# Supplementary material for: Genome-wide evolutionary dynamics of influenza B viruses on a global scale
Source: PubMed Central journal article supplement (PMC5790164; doi:10.1371/journal.ppat.1006749), 2017-12-28
Supplement: ppat.1006749.s004.pdf [file ppat.1006749.s004.pdf]

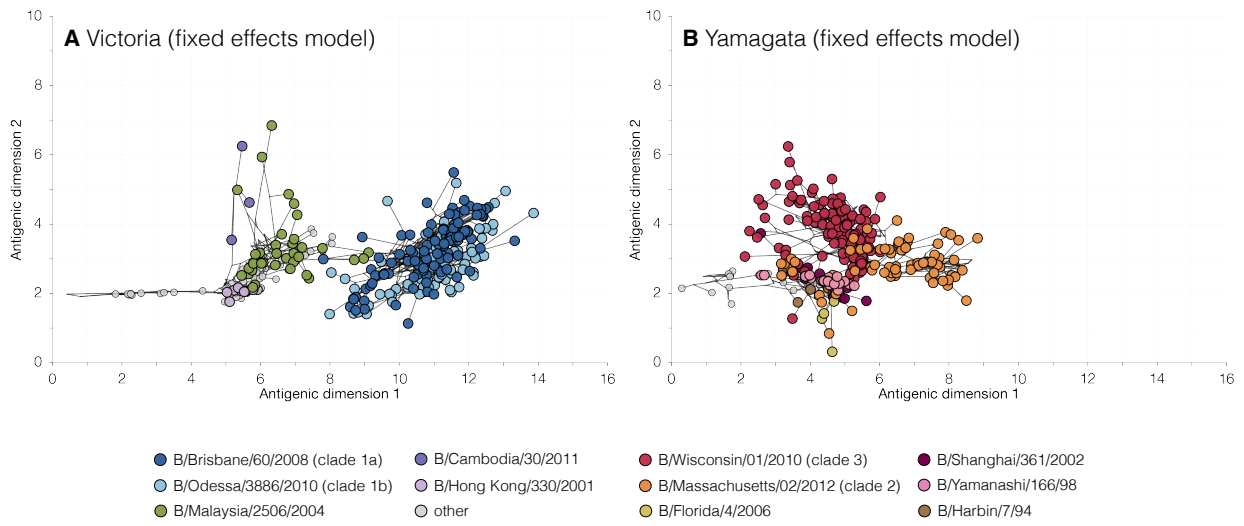

**S4 Fig. Antigenic and genetic evolutionary relationships of (A) Victoria-lineage and (B) Yamagata-lineage influenza B viruses inferred using a BMDS model with fixed serum potencies and virus avidities. See Fig 4 legend for further details.**
