# Supplementary material for: Genome-wide evolutionary dynamics of influenza B viruses on a global scale
Source: PLoS Pathog. 2017 Dec 28;13(12):e1006749. doi: 10.1371/journal.ppat.1006749 (PMC5790164; doi:10.1371/journal.ppat.1006749)
Supplement: S4 Table — (XLS) [file ppat.1006749.s017.xls]

## Sheet: HA
We acknowledge the authors, originating and submitting laboratories of the sequences from GISAID’s EpiFlu Database on which this research is based. The list is detailed below.
All submitters of data may be contacted directly via the GISAID website www.gisaid.org
Segment ID	Segment	Country	Collection date	Isolate name	Originating Lab	Submitting Lab	Authors
EPI573303	HA	Thailand	2013-Jan-01	B/Phuket/3073/2013 CDC-LV11B	Centers for Disease Control and Prevention	Centers for Disease Control and Prevention	Bousse, Tatiana; Shcherbik, Svetlana; Pearce, Nicolaus
EPI556422	HA	United States	2014-Jan-01	B/Utah/09/2014 BX-55A	New York Medical College	Centers for Disease Control and Prevention
EPI498340	HA	United States	2013-Jan-01	B/Texas/02/2013 BX-53C	New York Medical College	Centers for Disease Control and Prevention
EPI492574	HA	United States	2013-Jan-01	B/Texas/02/2013 BX-53B	New York Medical College	Centers for Disease Control and Prevention
EPI366691	HA	United States	2012-Jan-01	B/reassortant/NYMC BX-33D		Other Database Import	Wentworth,D.E.; Dugan,V.; Halpin,R.; Lin,X.; Bera,J.; Ghedin,E.; Fedorova,N.; Overton,L.; Tsitrin,T.; Stockwell,T.; Amedeo,P.; Bishop,B.; Chen,H.; Edworthy,P.; Gupta,N.; Katzel,D.; Li,K.; Schobel,S.; Shrivastava,S.; Thovarai,V.; Wang,S.; Ramanunninair,M.; Silverman,J.; Devis,R.; Phan,L.; Le,J.; Pokorny,B.A.; Onodera,S.; Fulvini,A.A.; He,Y.; Kilbourne,E.D.; Bucher,D.; Bao,Y.; Sanders,R.; Dernovoy,…
EPI366556	HA	United States	2012-Jan-01	B/reassortant/NYMC BX-25		Other Database Import	Wentworth,D.E.; Dugan,V.; Halpin,R.; Lin,X.; Bera,J.; Ghedin,E.; Fedorova,N.; Overton,L.; Tsitrin,T.; Stockwell,T.; Amedeo,P.; Bishop,B.; Chen,H.; Edworthy,P.; Gupta,N.; Katzel,D.; Li,K.; Schobel,S.; Shrivastava,S.; Thovarai,V.; Wang,S.; Ramanunninair,M.; Silverman,J.; Devis,R.; Phan,L.; Le,J.; Pokorny,B.A.; Onodera,S.; Fulvini,A.A.; He,Y.; Kilbourne,E.D.; Bucher,D.; Bao,Y.; Sanders,R.; Dernovoy,…
EPI294877	HA	China	2009-Jan-01	B/Hubei-Wujiagang/158/2009 BX-39A	New York Medical College	Centers for Disease Control and Prevention
EPI294874	HA	China	2009-Jan-01	B/Hubei-Wujiagang/158/2009 BX-39	New York Medical College	Centers for Disease Control and Prevention
EPI244702	HA	Australia	2009-Jan-01	B/Brisbane/60/2008 BX-33B	New York Medical College	Centers for Disease Control and Prevention
EPI233222	HA	United States	2009-Oct-24	B/Nebraska/02/2009	Nebraska Public Health Lab	Centers for Disease Control and Prevention
EPI630940	HA	United States	2015-May-02	B/Alaska/19/2015	Alaska State Virology Lab	Centers for Disease Control and Prevention
EPI630356	HA	Norway	2015-May-05	B/Norway/2354/2015	Health Forde, Department of Microbiology	Norwegian Institute of Public Health	Bragstad K, Dudman SG, Waalen K, Hungnes O
EPI630332	HA	Norway	2014-Dec-22	B/Norway/3215/2014	Aalesund sjukehus	Norwegian Institute of Public Health	Bragstad K, Dudman SG, Waalen K, Hungnes O
EPI630061	HA	Australia	2015-Jan-28	B/Sydney/2/2015	Clinical Virology Unit, CDIM	WHO Collaborating Centre for Reference and Research on Influenza	Deng, Y-M.; Iannello, P.; Spirason, N.; Jelly, L.; Lau, H.; Komadina, N.
EPI630022	HA	Australia	2015-Mar-20	B/Brisbane/19/2015	Queensland Health Scientific Services	WHO Collaborating Centre for Reference and Research on Influenza	Deng, Y-M.; Iannello, P.; Spirason, N.; Jelly, L.; Lau, H.; Komadina, N.
EPI628866	HA	Japan	2015-Apr-20	B/FUKUI/19/2015	Fukui Prefectural Institute of Public Health	National Institute of Infectious Diseases (NIID)	Takashita,Emi; Fujisaki,Seiichiro; Shirakura,Masayuki; Watanabe,Shinji; Odagiri,Takato
EPI628860	HA	Japan	2015-Apr-01	B/SHIMANE/7/2015	Shimane Prefectural Institute of Public Health and Environmental Science	National Institute of Infectious Diseases (NIID)	Takashita,Emi; Fujisaki,Seiichiro; Shirakura,Masayuki; Watanabe,Shinji; Odagiri,Takato
EPI625838	HA	Ukraine	2015-Mar-09	B/Zaporizza/331/2015	Institute of Epidemiology and Infectious Diseases AMS of Ukraine	Centers for Disease Control and Prevention
EPI625821	HA	Nigeria	2015-Mar-09	B/Nigeria/607/2015	National Influenza Reference Laboratory	Centers for Disease Control and Prevention
EPI625739	HA	Ukraine	2015-Mar-12	B/Ukraine/279/2015	Institute of Epidemiology and Infectious Diseases AMS of Ukraine	Centers for Disease Control and Prevention
EPI625724	HA	Ukraine	2015-Apr-01	B/Ukraine/401/2015	Institute of Epidemiology and Infectious Diseases AMS of Ukraine	Centers for Disease Control and Prevention
EPI624834	HA	Russian Federation	2015-Feb-05	B/Rostov-on-Don/4/2015	WHO National Influenza Centre Russian Federation	National Institute for Medical Research
EPI624832	HA	Russian Federation	2015-Mar-10	B/Orenburg/4/2015	Ivanovsky Research Institute of Virology RAMS	National Institute for Medical Research
EPI624812	HA	Moldova, Republic of	2015-Feb-18	B/Moldova/133.08/2015	National Centre for Preventive Medicine	National Institute for Medical Research
EPI624794	HA	Madagascar	2015-Jan-21	B/Mahajanga/271/2015	Institut Pasteur de Madagascar	National Institute for Medical Research
EPI624472	HA	Japan	2015-Mar-01	B/YOKOHAMA/9/2015	Yokohama City Institute of Health	National Institute of Infectious Diseases (NIID)	Takashita,Emi; Fujisaki,Seiichiro; Shirakura,Masayuki; Watanabe,Shinji; Odagiri,Takato
EPI624449	HA	France	2015-Mar-30	B/Paris/1632/2015	Institut Pasteur	Institut Pasteur
EPI622571	HA	France	2015-Apr-07	B/Nord Pas de Calais/1681/2015	Institut Pasteur	Institut Pasteur
EPI622432	HA	United States	2015-May-03	B/Washington/60/2015	Washington State Public Health Laboratory	Centers for Disease Control and Prevention
EPI621965	HA	Ukraine	2015-Feb-25	B/Ukraine/6452/2015	Ministry of Health of Ukraine	National Institute for Medical Research
EPI621943	HA	Ukraine	2015-Feb-06	B/Ukraine/6330/2015	Ministry of Health of Ukraine	National Institute for Medical Research
EPI621941	HA	Ukraine	2015-Jan-29	B/Ukraine/6295/2015	Ministry of Health of Ukraine	National Institute for Medical Research
EPI621925	HA	Spain	2015-Feb-16	B/Palencia/241/2015	Universidad de Valladolid	National Institute for Medical Research
EPI621911	HA	Norway	2015-Apr-20	B/Norway/2102/2015	WHO National Influenza Centre	National Institute for Medical Research
EPI621521	HA	Lao, People's Democratic Republic	2014-Dec-17	B/Laos/SA766/2014	Ministry of Health Laos	National Institute of Infectious Diseases (NIID)	Takashita,Emi; Fujisaki,Seiichiro; Shirakura,Masayuki; Watanabe,Shinji; Odagiri,Takato
EPI621501	HA	Japan	2015-Feb-21	B/YAMAGATA/53/2015	Yamagata Prefectural Institute of Public Health	National Institute of Infectious Diseases (NIID)	Takashita,Emi; Fujisaki,Seiichiro; Shirakura,Masayuki; Watanabe,Shinji; Odagiri,Takato
EPI620389	HA	United States	2015-Apr-02	B/Connecticut/56/2015	Connecticut Department. of Public Health	Centers for Disease Control and Prevention
EPI619082	HA	Japan	2015-Apr-11	B/KANAGAWA/10/2015	Kanagawa Prefectural Institute of Public Health	National Institute of Infectious Diseases (NIID)	Takashita,Emi; Fujisaki,Seiichiro; Shirakura,Masayuki; Watanabe,Shinji; Odagiri,Takato
EPI614741	HA	Kazakhstan	2015-Feb-17	B/Kazakhstan/360/2015	CSEE	Centers for Disease Control and Prevention
EPI614660	HA	United States	2015-May-07	B/Nevada/16/2015	Southern Nevada Public Health Lab	Centers for Disease Control and Prevention
EPI611193	HA	United States	2015-Mar-24	B/Kentucky/06/2015	Kentucky Division of Laboratory Services	Centers for Disease Control and Prevention
EPI603476	HA	United States	2015-Mar-12	B/Montana/10/2015	Montana Laboratory Services Bureau	Centers for Disease Control and Prevention
EPI603222	HA	United States	2015-Mar-25	B/Texas/48/2015	Texas Department of State Health Services-Laboratory Services	Centers for Disease Control and Prevention
EPI603166	HA	United States	2015-Mar-14	B/Vermont/16/2015	Vermont Department of Health Laboratory	Centers for Disease Control and Prevention
EPI603080	HA	United States	2015-Mar-01	B/New Jersey/07/2015	New Jersey Department of Health & Senior Services	Centers for Disease Control and Prevention
EPI603018	HA	United States	2015-Mar-28	B/Idaho/08/2015	State of Idaho Bureau of Laboratories	Centers for Disease Control and Prevention
EPI598787	HA	Finland	2015-Apr-02	B/Finland/530/2015	National Institute for Health and Welfare	National Institute for Health and Welfare	Ikonen, Niina; Haveri, Anu; Haanpää, Minna
EPI598375	HA	Italy	2015-Feb-02	B/Milano/12/2015	Istituto Superiore di Sanità	National Institute for Medical Research
EPI592871	HA	United States	2015-Apr-03	B/Vermont/15/2015	Vermont Department of Health Laboratory	Centers for Disease Control and Prevention
EPI621445	HA	United States	2015-Mar-11	B/North Dakota/22/2015	North Dakota Department of Health	Centers for Disease Control and Prevention
EPI592819	HA	United States	2015-Apr-01	B/North Dakota/17/2015	North Dakota Department of Health	Centers for Disease Control and Prevention
EPI590920	HA	Brazil	2015-Apr-21	B/Tocantins/43043/2015	Instituto Adolfo Lutz	Instituto Adolfo Lutz	Santos,Katia;Silva,Daniela;Benega,Margarete;Paulino,Renato;Santos,Cecilia;Paiva,Terezinha
EPI590319	HA	Netherlands	2015-Feb-25	B/Netherlands/1911/2015	National Institute for Public Health and the Environment (RIVM)	National Institute for Public Health and the Environment (RIVM)	A.Meijer, P.Overduin
EPI590317	HA	Netherlands	2015-Feb-23	B/Netherlands/1900/2015	National Institute for Public Health and the Environment (RIVM)	National Institute for Public Health and the Environment (RIVM)	A.Meijer, P.Overduin
EPI589430	HA	Georgia	2015-Feb-04	B/Georgia/162/2015	National Centre for Disease Control and Public Health	National Institute for Medical Research
EPI589428	HA	Spain	2015-Jan-28	B/Extremadura/740/2015	Instituto de Salud Carlos III	National Institute for Medical Research
EPI589406	HA	Bulgaria	2015-Feb-10	B/Bulgaria/317/2015	National Centre of Infectious and	National Institute for Medical Research
EPI589319	HA	Japan	2015-Feb-19	B/GUNMA/2/2015	Gunma Prefectural Institute of Public Health and Environmental Sciences	National Institute of Infectious Diseases (NIID)	Takashita,Emi; Fujisaki,Seiichiro; Shirakura,Masayuki; Watanabe,Shinji; Odagiri,Takato
EPI587251	HA	United States	2015-Mar-05	B/Texas/21/2015	Texas Department of State Health Services-Laboratory Services	Centers for Disease Control and Prevention
EPI587243	HA	United States	2015-Mar-03	B/Texas/22/2015	Texas Department of State Health Services-Laboratory Services	Centers for Disease Control and Prevention
EPI587114	HA	United States	2015-Feb-12	B/Oregon/01/2015	Oregon Public Health Laboratory	Centers for Disease Control and Prevention
EPI587042	HA	United States	2015-Jan-07	B/Washington/02/2015	Washington State Public Health Laboratory	Centers for Disease Control and Prevention
EPI587002	HA	United States	2015-Jan-26	B/Illinois/01/2015	Illinois Department of Public Health-Chicago	Centers for Disease Control and Prevention
EPI586986	HA	United States	2015-Jan-21	B/Michigan/02/2015	Michigan Department of Community Health	Centers for Disease Control and Prevention
EPI586889	HA	United States	2015-Feb-18	B/Georgia/03/2015	Georgia Public Health Laboratory	Centers for Disease Control and Prevention
EPI586881	HA	United States	2015-Feb-04	B/Georgia/02/2015	Georgia Public Health Laboratory	Centers for Disease Control and Prevention
EPI586785	HA	United States	2015-Jan-21	B/Wisconsin/04/2015	Wisconsin State Laboratory of Hygiene	Centers for Disease Control and Prevention
EPI586437	HA	China	2015-Jan-06	B/Hubei-Wujiagang/119/2015	WHO Chinese National Influenza Center	WHO Chinese National Influenza Center	Xiaoxu Zeng,Xiyan Li,Xiang Zhao,Yanhui Cheng,minju Tan,Weijuan Huang,Dayan Wang,Dexin Li,Yuelong Shu
EPI586419	HA	China	2015-Jan-20	B/Guangdong-Duanzhou/160/2015	WHO Chinese National Influenza Center	WHO Chinese National Influenza Center	Xiaoxu Zeng,Xiyan Li,Xiang Zhao,Yanhui Cheng,minju Tan,Weijuan Huang,Dayan Wang,Dexin Li,Yuelong Shu
EPI585363	HA	Sweden	2015-Mar-07	B/Stockholm/7/2015		Swedish Institute for Infectious Disease Control
EPI585355	HA	Sweden	2015-Mar-19	B/Stockholm/6/2015		Swedish Institute for Infectious Disease Control
EPI585070	HA	Japan	2015-Feb-23	B/OSAKA/7/2015	Osaka Prefectural Institute of Public Health	National Institute of Infectious Diseases (NIID)	Takashita,Emi; Fujisaki,Seiichiro; Shirakura,Masayuki; Watanabe,Shinji; Odagiri,Takato
EPI585052	HA	Japan	2015-Feb-05	B/OSAKA/4/2015	Osaka Prefectural Institute of Public Health	National Institute of Infectious Diseases (NIID)	Takashita,Emi; Fujisaki,Seiichiro; Shirakura,Masayuki; Watanabe,Shinji; Odagiri,Takato
EPI582886	HA	United States	2015-Mar-10	B/Colorado/04/2015	Colorado Department of Health Lab	Centers for Disease Control and Prevention
EPI582669	HA	United States	2015-Feb-20	B/New York/03/2015	New York State Department of Health	Centers for Disease Control and Prevention
EPI582657	HA	United States	2015-Jan-27	B/Hawaii/02/2015	State of Hawaii Department of Health	Centers for Disease Control and Prevention
EPI582567	HA	United States	2015-Mar-17	B/North Carolina/02/2015	North Carolina State Laboratory of Public Health	Centers for Disease Control and Prevention
EPI581824	HA	Japan	2015-Jan-16	B/FUKUSHIMA/3/2015	Fukushima Prefectural Institute of Public Health	National Institute of Infectious Diseases (NIID)	Takashita,Emi; Fujisaki,Seiichiro; Shirakura,Masayuki; Watanabe,Shinji; Odagiri,Takato
EPI581202	HA	Japan	2014-Feb-17	B/Niigata/13F180/2014		Other Database Import	Hibino,A.; Saito,R.; Shoubugawa,Y.; Kondo,H.; Saito,T.; Takemae,N.; Sato,I.
EPI580964	HA	Japan	2014-Feb-17	B/Nagasaki/13N052/2014		Other Database Import	Hibino,A.; Saito,R.; Shoubugawa,Y.; Kondo,H.; Saito,T.; Takemae,N.; Makiya,T.; Masaki,H.; Aso,N.; Kita,Y.; Kuroki,R.; Shirahige,Y.
EPI589028	HA	India	2011-Sep-02	B/Delhi/V06/2011		Other Database Import	Kumar,S.; Khare,S.; Saidullah,B.; Rai,A.
EPI580540	HA	Japan	2015-Jan-28	B/Niigata/14F259/2015		Niigata University	Saito, Reiko; Takemae, Nobuhiro; Saito, Takehiko; Shobugawa, Yugo; Kondo, Hiroki; Hibino, Akinobu; Sato, Isamu
EPI574844	HA	Ukraine	2014-Oct-31	B/Ukraine/426/2014	Institute of Epidemiology and Infectious Diseases AMS of Ukraine	National Institute for Medical Research
EPI574800	HA	Portugal	2014-Dec-23	B/Lisboa/23/2014	Instituto Nacional de Saude	National Institute for Medical Research
EPI574796	HA	Portugal	2014-Dec-23	B/Lisboa/20/2014	Instituto Nacional de Saude	National Institute for Medical Research
EPI574794	HA	Portugal	2015-Jan-06	B/Lisboa/17/2015	Instituto Nacional de Saude	National Institute for Medical Research
EPI573108	HA	Macao	2013-May-13	B/Macau/610712/2013	Laboratorio De Saude Publico	WHO Collaborating Centre for Reference and Research on Influenza	Leang,S-K; Tilmanis,D; Hurt,A; Komadina,N.
EPI569235	HA	United States	2014-Dec-24	B/Wisconsin/17/2014	Wisconsin State Laboratory of Hygiene	Centers for Disease Control and Prevention
EPI569162	HA	United States	2014-Dec-14	B/Texas/35/2014	Texas Department of State Health Services, South Texas Laboratory	Centers for Disease Control and Prevention
EPI569104	HA	Chile	2014-Nov-07	B/Punta Arenas/72547/2014	Instituto de Salud Publica de Chile	Centers for Disease Control and Prevention
EPI569036	HA	United States	2015-Jan-12	B/New Hampshire/02/2015	New Hampshire Public Health Laboratories	Centers for Disease Control and Prevention
EPI568887	HA	United States	2014-Sep-08	B/Florida/62/2014	Florida Department of Health-Tampa	Centers for Disease Control and Prevention
EPI568872	HA	United States	2014-Dec-28	B/California/34/2014	California Department of Health Services	Centers for Disease Control and Prevention
EPI568865	HA	United States	2014-Nov-03	B/California/29/2014	California Department of Health Services	Centers for Disease Control and Prevention
EPI568842	HA	United States	2015-Jan-02	B/Alaska/03/2015	Alaska State Virology Lab	Centers for Disease Control and Prevention
EPI568141	HA	Myanmar	2014-Aug-03	B/Myanmar/14M238/2014		Niigata University	Saito, Reiko; Takemae, Nobuhiro; Saito, Takehiko; Shobugawa, Yugo; Kondo, Hiroki; Hibino, Akinobu; Yadanar, Kyaw; Yi Yi, Myint; Khin Yi, Oo; Htay Htay, Tin
EPI566999	HA	Japan	2014-Mar-13	B/Kyoto/13SK045/2014		Niigata University	Saito, Reiko; Takemae, Nobuhiro; Saito, Takehiko; Shobugawa, Yugo; Kondo, Hiroki; Hibino, Akinobu; Kodo, Naoki
EPI566853	HA	Japan	2015-Jan-12	B/OITA/2/2015	Oita Prefectural Institute of Health and Environment	National Institute of Infectious Diseases (NIID)	Takashita,Emi; Fujisaki,Seiichiro; Shirakura,Masayuki; Watanabe,Shinji; Odagiri,Takato
EPI566801	HA	Vietnam	2013-Aug-13	B/Vietnam/13V B-6/2013		Niigata University	Saito, Reiko; Takemae, Nobuhiro; Saito, Takehiko; Shobugawa, Yugo; Kondo, Hiroki; Hibino, Akinobu
EPI566319	HA	Sweden	2014-Dec-10	B/Stockholm/9/2014		Swedish Institute for Infectious Disease Control
EPI566311	HA	Sweden	2014-Dec-15	B/Stockholm/8/2014		Swedish Institute for Infectious Disease Control
EPI565181	HA	Paraguay	2014-Dec-09	B/Paraguay/4674/2014	Central Laboratory of Public Health	Centers for Disease Control and Prevention
EPI565143	HA	Thailand	2014-Nov-25	B/Nonthaburi/373/2014	WHO National Influenza Centre, National Institute of Medical Research (NIMR)	Centers for Disease Control and Prevention
EPI564814	HA	Taiwan	2014-Oct-01	B/Taiwan/445/2014	Center for Disease Control	National Institute of Infectious Diseases (NIID)	Takashita,Emi; Fujisaki,Seiichiro; Shirakura,Masayuki; Watanabe,Shinji; Odagiri,Takato
EPI562688	HA	Korea, Republic of	2014-Dec-23	B/Gangwon/2004/2014	National Institute of Health	Centers for Disease Control and Prevention
EPI562665	HA	United States	2014-Dec-29	B/Wisconsin/18/2014	Wisconsin State Laboratory of Hygiene	Centers for Disease Control and Prevention
EPI562663	HA	Thailand	2014-Sep-17	B/Nonthaburi/359/2014	WHO National Influenza Centre, National Institute of Medical Research (NIMR)	Centers for Disease Control and Prevention
EPI562651	HA	United States	2015-Jan-05	B/Arkansas/01/2015	Arkansas Department of Health	Centers for Disease Control and Prevention
EPI562370	HA	Zambia	2014-Dec-11	B/Zambia/04-306/2014	University Teaching Hospital	National Institute for Medical Research
EPI562338	HA	Finland	2014-Dec-15	B/Finland/471/2014	National Institute for Health and Welfare	National Institute for Medical Research
EPI562328	HA	Cameroon	2014-Oct-30	B/Cameroon/14V-7839/2014	Centre Pasteur du Cameroun	National Institute for Medical Research
EPI562326	HA	Cameroon	2014-Oct-27	B/Cameroon/14V-7837/2014	Centre Pasteur du Cameroun	National Institute for Medical Research
EPI562033	HA	Sri Lanka	2014-Dec-01	B/Sri Lanka/7/2014	Medical Research Institute	WHO Collaborating Centre for Reference and Research on Influenza	Deng,Y-M.; Iannello,P.; Spirason,N; Jelley,L.;Lau,H.; Komadina,N.
EPI561921	HA	Australia	2014-Oct-30	B/Victoria/6/2014	Victorian Infectious Diseases Reference Laboratory	WHO Collaborating Centre for Reference and Research on Influenza	Deng,Y-M.; Iannello,P.; Spirason,N; Jelley,L.;Lau,H.; Komadina,N.
EPI561900	HA	New Caledonia	2014-Oct-13	B/New Caledonia/4/2014	Institut Pasteur New Caledonia	WHO Collaborating Centre for Reference and Research on Influenza	Deng,Y-M.; Iannello,P.; Spirason,N; Jelley,L.;Lau,H.; Komadina,N.
EPI561894	HA	New Caledonia	2014-Dec-04	B/New Caledonia/12/2014	Institut Pasteur New Caledonia	WHO Collaborating Centre for Reference and Research on Influenza	Deng,Y-M.; Iannello,P.; Spirason,N; Jelley,L.;Lau,H.; Komadina,N.
EPI561885	HA	Australia	2014-Nov-11	B/Brisbane/70/2014	Queensland Health Scientific Services	WHO Collaborating Centre for Reference and Research on Influenza	Deng,Y-M.; Iannello,P.; Spirason,N; Jelley,L.;Lau,H.; Komadina,N.
EPI561879	HA	Australia	2014-Oct-20	B/Brisbane/65/2014	Queensland Health Scientific Services	WHO Collaborating Centre for Reference and Research on Influenza	Deng,Y-M.; Iannello,P.; Spirason,N; Jelley,L.;Lau,H.; Komadina,N.
EPI557956	HA	Switzerland	2014-Dec-16	B/Switzerland/016/2014	Hopital Cantonal Universitaire de Geneves	National Institute for Medical Research
EPI557936	HA	Portugal	2014-Dec-18	B/Lisboa/10/2014	Instituto Nacional de Saude	National Institute for Medical Research
EPI556950	HA	France	2014-Dec-15	B/Lyon/2423/2014	CRR virus Influenza region Sud	National Institute for Medical Research
EPI556388	HA	United States	2014-Dec-11	B/Alabama/04/2014	ADPH Bureau of Clinical Laboratories	Centers for Disease Control and Prevention
EPI555215	HA	France	2014-Sep-25	B/Paris/2058/2014	Institut Pasteur	National Institute for Medical Research
EPI555203	HA	United Kingdom	2014-Nov-14	B/England/522/2014	Health Protection Agency	National Institute for Medical Research
EPI555201	HA	United Kingdom	2014-Oct-22	B/England/515/2014	Health Protection Agency	National Institute for Medical Research
EPI555199	HA	France	2014-Nov-25	B/Centre/2213/2014	Institut Pasteur	National Institute for Medical Research
EPI554853	HA	China	2014-Oct-20	B/Jiangsu-Jurong/1279/2014	WHO Chinese National Influenza Center	WHO Chinese National Influenza Center	Xiaoxu Zeng,Xiyan Li,Xiang Zhao,Yanhui Cheng,minju Tan,Weijuan Huang,Dayan Wang,Dexin Li,Yuelong Shu
EPI554826	HA	China	1999-Nov-17	B/hanfang/383/1999	WHO Chinese National Influenza Center	WHO Chinese National Influenza Center	Xiaoxu Zeng,Xiyan Li,Xiang Zhao,Yanhui Cheng,minju Tan,Weijuan Huang,Dayan Wang,Dexin Li,Yuelong Shu
EPI553991	HA	United States	2014-Nov-26	B/Wisconsin/12/2014	Wisconsin State Laboratory of Hygiene	Centers for Disease Control and Prevention
EPI552466	HA	United States	2014-Oct-20	B/Montana/03/2014	Montana Laboratory Services Bureau	Centers for Disease Control and Prevention
EPI551289	HA	Australia	2014-Aug-12	B/NEWCASTLE/25/2014	John Hunter Hospital	WHO Collaborating Centre for Reference and Research on Influenza	Deng,Y-M.; Iannello,P.; Spirason,N.; Jelley,L.; Lau,H.; Komadina,N.
EPI551113	HA	China	2014-Sep-05	B/Guangxi-Yuzhou/1683/2014	WHO Chinese National Influenza Center	WHO Chinese National Influenza Center	Xiaoxu Zeng, Xiyan Li
EPI550819	HA	China	2014-Apr-12	B/Shanghai-Hongkou/1286/2014	WHO Chinese National Influenza Center	Centers for Disease Control and Prevention
EPI550813	HA	United States	2014-Aug-18	B/Hawaii/25/2014	State of Hawaii Department of Health	Centers for Disease Control and Prevention
EPI549750	HA	China	2014-Apr-17	B/Shanghai-Chongming/1364/2014	WHO Chinese National Influenza Center	National Institute for Medical Research
EPI545298	HA	Russian Federation	2014-Mar-24	B/Kostroma/CRIE-19/2014	Central Research Institute for Epidemiology	Central Research Institute for Epidemiology	Svetlana,Yatsyshina; Anna,Renteeva; Anna,Valdokhina; German,Shipulin
EPI544655	HA	Sweden	2014-Oct-19	B/Gothenburg/1/2014		Swedish Institute for Infectious Disease Control
EPI544264	HA	Thailand	2013-Nov-21	B/Phuket/3073/2013	WHO Collaborating Centre for Reference and Research on Influenza	Centers for Disease Control and Prevention
EPI544259	HA	Australia	2014-Mar-24	B/Brisbane/09/2014	WHO Collaborating Centre for Reference and Research on Influenza	Centers for Disease Control and Prevention
EPI544243	HA	Bangladesh	2014-Jun-21	B/Bangladesh/2015/2014	Institute of Epidemiology Disease Control and Research (IEDCR) & Bangladesh National Influenza Centre (NIC)	Centers for Disease Control and Prevention
EPI544178	HA	Lao, People's Democratic Republic	2014-Mar-11	B/Laos/I278/2014	Ministry of Health Laos	National Institute of Infectious Diseases (NIID)	Takashita,Emi; Fujisaki,Seiichiro; Shirakura,Masayuki; Odagiri,Takato
EPI544156	HA	Japan	2014-Mar-13	B/KYOTO-C/15/2014	Kyoto City Institute of Health and Environmental Sciences	National Institute of Infectious Diseases (NIID)	Takashita,Emi; Fujisaki,Seiichiro; Shirakura,Masayuki; Odagiri,Takato
EPI543642	HA	United States	2014-Aug-27	B/Minnesota/06/2014	Minnesota Department of Health	Centers for Disease Control and Prevention
EPI543182	HA	Argentina	2014-Jul-02	B/Chaco/5277/2014	Instituto Nacional de Enfermedades Infecciosas	National Institute for Medical Research
EPI543180	HA	Cameroon	2014-Jan-29	B/Cameroon/598/2014	Centre Pasteur du Cameroun	National Institute for Medical Research
EPI541713	HA	Guatemala	2014-Jul-10	B/Guatemala/114/2014	Laboratorio Nacional De Salud Guatemala	Centers for Disease Control and Prevention
EPI541497	HA	Japan	2014-Apr-08	B/AKITA/5/2014	Akita Research Center for Public Health and Environment	National Institute of Infectious Diseases (NIID)	Takashita,Emi; Fujisaki,Seiichiro; Shirakura,Masayuki; Odagiri,Takato
EPI541491	HA	Japan	2014-May-30	B/NAGANO/2349/2014	Nagano Environmental Conservation Research Institute	National Institute of Infectious Diseases (NIID)	Takashita,Emi; Fujisaki,Seiichiro; Shirakura,Masayuki; Odagiri,Takato
EPI541372	HA	Macao	2014-Feb-07	B/MACAU/610357/2014	Laboratorio De Saude Publico	WHO Collaborating Centre for Reference and Research on Influenza	Deng,Y-M.; Iannello,P.; Spirason,N.; Jelley,L.; Lau,H.; Komadina,N.
EPI541304	HA	Malaysia	2014-Jan-30	B/MALAYSIA/2/2014	Institut Penyelidikan Perubatan	WHO Collaborating Centre for Reference and Research on Influenza	Deng,Y-M.; Iannello,P.; Spirason,N.; Jelley,L.; Lau,H.; Komadina,N.
EPI541302	HA	Mongolia	2014-Feb-10	B/ULAANBAATAR/1113/2014	National Influenza Center	WHO Collaborating Centre for Reference and Research on Influenza	Deng,Y-M.; Iannello,P.; Spirason,N.; Jelley,L.; Lau,H.; Komadina,N.
EPI541109	HA	Norway	2014-Feb-12	B/Norway/593/2014	Sorlandet Sykehus HF, Dept. of Medical Microbiology	Norwegian Institute of Public Health	Bragstad K, Dudman SG, Waalen K, Hungnes O
EPI540759	HA	Australia	2014-Mar-26	B/SYDNEY/5/2014	Prince of Wales Hospital	WHO Collaborating Centre for Reference and Research on Influenza	Deng,Y-M.; Iannello,P.; Spirason,N.; Jelley,L.; Lau,H.; Komadina,N.
EPI540744	HA	Australia	2014-Apr-08	B/DARWIN/35/2014	Royal Darwin Hospital	WHO Collaborating Centre for Reference and Research on Influenza	Deng,Y-M.; Iannello,P.; Spirason,N.; Jelley,L.; Lau,H.; Komadina,N.
EPI540633	HA	Cameroon	2014-Jun-25	B/Cameroon/4314/2014	Centre Pasteur du Cameroun	National Institute for Medical Research
EPI540584	HA	Hong Kong (SAR)	2014-May-26	B/Hong Kong/3343/2014	Government Virus Unit	Centers for Disease Control and Prevention
EPI540581	HA	Guatemala	2014-Apr-14	B/Guatemala/73/2014	Laboratorio Nacional De Salud Guatemala	Centers for Disease Control and Prevention
EPI539450	HA	Russian Federation	2014-Mar-24	B/Moscow/9/2014	Ivanovsky Research Institute of Virology RAMS	National Institute for Medical Research
EPI539436	HA	Portugal	2014-Feb-27	B/Lisboa/3/2014	Instituto Nacional de Saude	National Institute for Medical Research
EPI539398	HA	Brazil	2014-Jul-02	B/Goias/57970/2014	Instituto Adolfo Lutz	Instituto Adolfo Lutz	Santos,Katia;Silva,Daniela;Benega,Margarete;Paulino,Renato;Santos,Cecilia;Paiva,Terezinha
EPI538882	HA	Japan	2014-Feb-10	B/YOKOHAMA/71/2014	Yokohama City Institute of Health	National Institute of Infectious Diseases (NIID)	Takashita,Emi; Fujisaki,Seiichiro; Shirakura,Masayuki; Ejima,Miho; Tashiro,Masato; Odagiri,Takato
EPI538878	HA	Japan	2014-Jan-11	B/YOKOHAMA/2/2014	Yokohama City Institute of Health	National Institute of Infectious Diseases (NIID)	Takashita,Emi; Fujisaki,Seiichiro; Shirakura,Masayuki; Ejima,Miho; Tashiro,Masato; Odagiri,Takato
EPI538876	HA	Japan	2014-Apr-30	B/AICHI/49/2014	Aichi Prefectural Institute of Public Health	National Institute of Infectious Diseases (NIID)	Takashita,Emi; Fujisaki,Seiichiro; Shirakura,Masayuki; Ejima,Miho; Tashiro,Masato; Odagiri,Takato
EPI538191	HA	Panama	2014-May-13	B/Panama/314927/2014	Instituto Conmemorativo Gorgas de Estudios de la Salud	Centers for Disease Control and Prevention
EPI538188	HA	United States	2014-Jun-28	B/New York/13/2014	New York State Department of Health	Centers for Disease Control and Prevention
EPI538185	HA	United States	2014-Jun-18	B/Nevada/19/2014	Nevada State Health Laboratory	Centers for Disease Control and Prevention
EPI538179	HA	United States	2014-Jun-04	B/Hawaii/07/2014	State of Hawaii Department of Health	Centers for Disease Control and Prevention
EPI538125	HA	United States	2014-May-29	B/Utah/09/2014	Utah Department of Health	Centers for Disease Control and Prevention
EPI538116	HA	China	2014-May-17	B/Shanghai-Changning/1377/2014	WHO Chinese National Influenza Center	Centers for Disease Control and Prevention
EPI538107	HA	China	2014-May-12	B/Guangdong-Zhongshan/1465/2014	WHO Chinese National Influenza Center	Centers for Disease Control and Prevention
EPI538104	HA	China	2014-Apr-14	B/Sichuan-Gaoxin/183/2014	WHO Chinese National Influenza Center	Centers for Disease Control and Prevention
EPI536537	HA	United States	2014-May-07	B/California/18/2014	California Department of Health Services	Centers for Disease Control and Prevention
EPI536525	HA	United States	2014-Jun-05	B/North Carolina/05/2014	North Carolina State Laboratory of Public Health	Centers for Disease Control and Prevention
EPI536447	HA	Hong Kong (SAR)	2014-Jun-04	B/Hong Kong/3417/2014	Government Virus Unit	National Institute for Medical Research
EPI536443	HA	Hong Kong (SAR)	2014-May-09	B/Hong Kong/3224/2014	Government Virus Unit	National Institute for Medical Research
EPI536210	HA	Brazil	2014-Jun-22	B/Sao Paulo/57408/2014	Instituto Adolfo Lutz	Instituto Adolfo Lutz	Santos,Katia;Silva,Daniela;Benega,Margarete;Paulino,Renato;Santos,Cecilia;Paiva,Terezinha
EPI534702	HA	Japan	2014-Feb-03	B/CHIBA/9/2014	Chiba Prefectural Institute of Public Health	National Institute of Infectious Diseases (NIID)	Takashita,Emi; Fujisaki,Seiichiro; Shirakura,Masayuki; Ejima,Miho; Tashiro,Masato; Odagiri,Takato
EPI534684	HA	Taiwan	2014-May-16	B/Taiwan/190/2014	Center for Disease Control	National Institute of Infectious Diseases (NIID)	Takashita,Emi; Fujisaki,Seiichiro; Shirakura,Masayuki; Ejima,Miho; Tashiro,Masato; Odagiri,Takato
EPI534648	HA	Japan	2014-Jan-15	B/SHIMANE/1/2014	Shimane Prefectural Institute of Public Health and Environmental Science	National Institute of Infectious Diseases (NIID)	Takashita,Emi; Fujisaki,Seiichiro; Shirakura,Masayuki; Ejima,Miho; Tashiro,Masato; Odagiri,Takato
EPI533652	HA	United States	2014-May-04	B/New Mexico/02/2014	New Mexico Department of Health	Centers for Disease Control and Prevention
EPI533076	HA	Latvia	2014-Mar-11	A/Latvia/03-022701/2014	State Agency, Infectology Center of Latvia	National Institute for Medical Research
EPI533062	HA	Ukraine	2014-Mar-03	B/Dnipro/231/2014	Institute of Epidemiology and Infectious Diseases AMS of Ukraine	National Institute for Medical Research
EPI533002	HA	Japan	2014-Apr-14	B/GUNMA/80/2014	Gunma Prefectural Institute of Public Health and Environmental Sciences	National Institute of Infectious Diseases (NIID)	Takashita,Emi; Fujisaki,Seiichiro; Shirakura,Masayuki; Ejima,Miho; Tashiro,Masato; Odagiri,Takato
EPI532986	HA	Japan	2014-Mar-20	B/SAKAI/75/2014	Sakai City Institute of Public Health	National Institute of Infectious Diseases (NIID)	Takashita,Emi; Fujisaki,Seiichiro; Shirakura,Masayuki; Ejima,Miho; Tashiro,Masato; Odagiri,Takato
EPI532976	HA	Japan	2014-Feb-24	B/HIROSHIMA/12/2014	Center for Public Health and Environment, Hiroshima Prefectural Technology Research Institute	National Institute of Infectious Diseases (NIID)	Takashita,Emi; Fujisaki,Seiichiro; Shirakura,Masayuki; Ejima,Miho; Tashiro,Masato; Odagiri,Takato
EPI532974	HA	Japan	2014-Jan-31	B/AOMORI/6/2014	Aomori Prefectural Institute of Public Health and Environment	National Institute of Infectious Diseases (NIID)	Takashita,Emi; Fujisaki,Seiichiro; Shirakura,Masayuki; Ejima,Miho; Tashiro,Masato; Odagiri,Takato
EPI532895	HA	Brazil	2014-May-22	B/Sao Paulo/49235/2014	Instituto Adolfo Lutz	Instituto Adolfo Lutz	Santos,Katia;Silva,Daniela;Benega,Margarete;Paulino,Renato;Santos,Cecilia;Paiva,Terezinha
EPI532239	HA	United States	2014-Mar-28	B/New York/3868/2014		Other Database Import	Connors,B.C.; Jones,S.L.; Bisaha,S.A.; Canas,L.C.; Baker,J.A.; Couch,M.R.; Garrett,C.M.; Powell,M.L.; Hanson,J.F.; Yohannes,R.A.; DeMarcus,L.S.; Smith,J.P.; Fumia,K.F.; Zorich,S.C.; Macias,E.A.; Olsen,E.T.; Sjoberg,P.A.
EPI532234	HA	United States	2014-Mar-26	B/New Jersey/3863/2014		Other Database Import	Connors,B.C.; Jones,S.L.; Bisaha,S.A.; Canas,L.C.; Baker,J.A.; Couch,M.R.; Garrett,C.M.; Powell,M.L.; Hanson,J.F.; Yohannes,R.A.; DeMarcus,L.S.; Smith,J.P.; Fumia,K.F.; Zorich,S.C.; Macias,E.A.; Olsen,E.T.; Sjoberg,P.A.
EPI532226	HA	Korea, Republic of	2014-Jan-17	B/Korea/3855/2014		Other Database Import	Connors,B.C.; Jones,S.L.; Bisaha,S.A.; Canas,L.C.; Baker,J.A.; Couch,M.R.; Garrett,C.M.; Powell,M.L.; Hanson,J.F.; Yohannes,R.A.; DeMarcus,L.S.; Smith,J.P.; Fumia,K.F.; Zorich,S.C.; Macias,E.A.; Olsen,E.T.; Sjoberg,P.A.
EPI532207	HA	United States	2014-Feb-19	B/Nevada/3836/2014		Other Database Import	Connors,B.C.; Jones,S.L.; Bisaha,S.A.; Canas,L.C.; Baker,J.A.; Couch,M.R.; Garrett,C.M.; Powell,M.L.; Hanson,J.F.; Yohannes,R.A.; DeMarcus,L.S.; Smith,J.P.; Fumia,K.F.; Zorich,S.C.; Macias,E.A.; Olsen,E.T.; Sjoberg,P.A.
EPI532200	HA	Japan	2014-Feb-07	B/Japan/3829/2014		Other Database Import	Connors,B.C.; Jones,S.L.; Bisaha,S.A.; Canas,L.C.; Baker,J.A.; Couch,M.R.; Garrett,C.M.; Powell,M.L.; Hanson,J.F.; Yohannes,R.A.; DeMarcus,L.S.; Smith,J.P.; Fumia,K.F.; Zorich,S.C.; Macias,E.A.; Olsen,E.T.; Sjoberg,P.A.
EPI532192	HA	United States	2014-Apr-04	B/Illinois/3821/2014		Other Database Import	Connors,B.C.; Jones,S.L.; Bisaha,S.A.; Canas,L.C.; Baker,J.A.; Couch,M.R.; Garrett,C.M.; Powell,M.L.; Hanson,J.F.; Yohannes,R.A.; DeMarcus,L.S.; Smith,J.P.; Fumia,K.F.; Zorich,S.C.; Macias,E.A.; Olsen,E.T.; Sjoberg,P.A.
EPI531427	HA	Japan	2014-Jan-17	B/TOYAMA/4/2014	Toyama Institute of Health	National Institute of Infectious Diseases (NIID)	Takashita,Emi; Fujisaki,Seiichiro; Shirakura,Masayuki; Ejima,Miho; Tashiro,Masato; Odagiri,Takato
EPI531413	HA	Japan	2014-Jan-10	B/KOCHI/102/2014	Kochi Public Health and Sanitation Institute	National Institute of Infectious Diseases (NIID)	Takashita,Emi; Fujisaki,Seiichiro; Shirakura,Masayuki; Ejima,Miho; Tashiro,Masato; Odagiri,Takato
EPI529619	HA	Australia	2014-Jan-28	B/BRISBANE/4/2014	Queensland Health Scientific Services	WHO Collaborating Centre for Reference and Research on Influenza	Deng,Y-M.; Iannello,P.; Spirason,N.; Jelley,L.; Lau,H.; Komadina,N.
EPI529392	HA	Australia	2014-Jan-20	B/BRISBANE/3/2014	Queensland Health Scientific Services	WHO Collaborating Centre for Reference and Research on Influenza	Deng,Y-M.; Iannello,P.; Spirason,N.; Jelley,L.; Lau,H.; Komadina,N.
EPI529389	HA	Ghana	2013-Jan-01	B/GHANA/1118/2013	National Institute for Medical Research	WHO Collaborating Centre for Reference and Research on Influenza	Deng,Y-M.; Iannello,P.; Spirason,N.; Jelley,L.; Lau,H.; Komadina,N.
EPI529371	HA	Australia	2013-Dec-31	B/DARWIN/57/2013	Royal Darwin Hospital	WHO Collaborating Centre for Reference and Research on Influenza	Deng,Y-M.; Iannello,P.; Spirason,N.; Jelley,L.; Lau,H.; Komadina,N.
EPI529097	HA	Nicaragua	2012-Sep-02	B/Nicaragua/AGB2-09/2012		Other Database Import	Wentworth,D.E.; Halpin,R.A.; Lin,X.; Bera,J.; Akopov,A.; Ransier,A.; Mohan,M.; Fedorova,N.; Tsitrin,T.; Puri,V.; Stockwell,T.; Amedeo,P.; Appalla,L.; Bishop,B.; Edworthy,P.; Gupta,N.; Hoover,J.; Katzel,D.; Li,K.; Schobel,S.; Shrivastava,S.; Thovarai,V.; Wang,S.; Bao,Y.; Sanders,R.; Zhdanov,S.; Kiryutin,B.; Lipman,D.J.; Tatusova,T.; Gordon,A.
EPI528961	HA	Nicaragua	2012-Jun-26	B/Nicaragua/AGB2-33/2012		Other Database Import	Wentworth,D.E.; Halpin,R.A.; Lin,X.; Bera,J.; Akopov,A.; Ransier,A.; Mohan,M.; Fedorova,N.; Tsitrin,T.; Puri,V.; Stockwell,T.; Amedeo,P.; Appalla,L.; Bishop,B.; Edworthy,P.; Gupta,N.; Hoover,J.; Katzel,D.; Li,K.; Schobel,S.; Shrivastava,S.; Thovarai,V.; Wang,S.; Bao,Y.; Sanders,R.; Zhdanov,S.; Kiryutin,B.; Lipman,D.J.; Tatusova,T.; Gordon,A.
EPI528969	HA	Nicaragua	2012-Nov-10	B/Nicaragua/AGB2-34/2012		Other Database Import	Wentworth,D.E.; Halpin,R.A.; Lin,X.; Bera,J.; Akopov,A.; Ransier,A.; Mohan,M.; Fedorova,N.; Tsitrin,T.; Puri,V.; Stockwell,T.; Amedeo,P.; Appalla,L.; Bishop,B.; Edworthy,P.; Gupta,N.; Hoover,J.; Katzel,D.; Li,K.; Schobel,S.; Shrivastava,S.; Thovarai,V.; Wang,S.; Bao,Y.; Sanders,R.; Zhdanov,S.; Kiryutin,B.; Lipman,D.J.; Tatusova,T.; Gordon,A.
EPI528878	HA	Nicaragua	2012-Oct-24	B/Nicaragua/AGB2-41/2012		Other Database Import	Wentworth,D.E.; Halpin,R.A.; Lin,X.; Bera,J.; Akopov,A.; Ransier,A.; Mohan,M.; Fedorova,N.; Tsitrin,T.; Puri,V.; Stockwell,T.; Amedeo,P.; Appalla,L.; Bishop,B.; Edworthy,P.; Gupta,N.; Hoover,J.; Katzel,D.; Li,K.; Schobel,S.; Shrivastava,S.; Thovarai,V.; Wang,S.; Bao,Y.; Sanders,R.; Zhdanov,S.; Kiryutin,B.; Lipman,D.J.; Tatusova,T.; Gordon,A.
EPI528795	HA	United States	2014-Jan-21	B/California/NHRC417937/2014		Other Database Import	Thammavong,H.; Balansay-Ames,M.; Hawksworth,A.; Myers,C.A.; Connors,B.; de Mattos,C.; Brice,G.
EPI526825	HA	Australia	2013-Nov-09	B/DARWIN/24/2013	Royal Darwin Hospital	WHO Collaborating Centre for Reference and Research on Influenza	Deng,Y-D.; Iannello,P.; Spirason,N.; Jelley,L.; Lau,H.; Komadina,N.
EPI526719	HA	Australia	2013-Oct-12	B/CANBERRA/112/2013	Canberra Hospital	WHO Collaborating Centre for Reference and Research on Influenza	Deng,Y-D.; Iannello,P.; Spirason,N.; Jelley,L.; Lau,H.; Komadina,N.
EPI526053	HA	Canada	2014-Mar-12	B/Ontario/RV1322/2014	National Microbiology Laboratory, Health Canada	Centers for Disease Control and Prevention
EPI524271	HA	United States	2014-Mar-17	B/Connecticut/02/2014	Connecticut Department. of Public Health	Centers for Disease Control and Prevention
EPI520497	HA	Thailand	2014-Mar-01	B/Bangkok/132/2014	WHO National Influenza Centre, National Institute of Medical Research (NIMR)	Centers for Disease Control and Prevention
EPI520482	HA	United States	2014-Mar-05	B/Wisconsin/03/2014	Wisconsin State Laboratory of Hygiene	Centers for Disease Control and Prevention
EPI520203	HA	United States	2012-May-05	B/New York/1374/2012		Other Database Import	Wentworth,D.E.; Halpin,R.A.; Lin,X.; Bera,J.; Akopov,A.; Ransier,A.; Mohan,M.; Fedorova,N.; Tsitrin,T.; Stockwell,T.; Amedeo,P.; Appalla,L.; Bishop,B.; Edworthy,P.; Gupta,N.; Hoover,J.; Katzel,D.; Li,K.; Schobel,S.; Shrivastava,S.; Thovarai,V.; Wang,S.; Griesemer,S.B.; Bao,Y.; Sanders,R.; Zhdanov,S.; Kiryutin,B.; Lipman,D.J.; Tatusova,T.; St. George,K.
EPI520163	HA	United States	2012-Apr-26	B/New York/1367/2012		Other Database Import	Wentworth,D.E.; Halpin,R.A.; Lin,X.; Bera,J.; Akopov,A.; Ransier,A.; Mohan,M.; Fedorova,N.; Tsitrin,T.; Stockwell,T.; Amedeo,P.; Appalla,L.; Bishop,B.; Edworthy,P.; Gupta,N.; Hoover,J.; Katzel,D.; Li,K.; Schobel,S.; Shrivastava,S.; Thovarai,V.; Wang,S.; Griesemer,S.B.; Bao,Y.; Sanders,R.; Zhdanov,S.; Kiryutin,B.; Lipman,D.J.; Tatusova,T.; St. George,K.
EPI520099	HA	United States	2012-Apr-21	B/New York/1356/2012		Other Database Import	Wentworth,D.E.; Halpin,R.A.; Lin,X.; Bera,J.; Akopov,A.; Ransier,A.; Mohan,M.; Fedorova,N.; Tsitrin,T.; Stockwell,T.; Amedeo,P.; Appalla,L.; Bishop,B.; Edworthy,P.; Gupta,N.; Hoover,J.; Katzel,D.; Li,K.; Schobel,S.; Shrivastava,S.; Thovarai,V.; Wang,S.; Griesemer,S.B.; Bao,Y.; Sanders,R.; Zhdanov,S.; Kiryutin,B.; Lipman,D.J.; Tatusova,T.; St. George,K.
EPI520083	HA	United States	2012-Apr-11	B/New York/1354/2012		Other Database Import	Wentworth,D.E.; Halpin,R.A.; Lin,X.; Bera,J.; Akopov,A.; Ransier,A.; Mohan,M.; Fedorova,N.; Tsitrin,T.; Stockwell,T.; Amedeo,P.; Appalla,L.; Bishop,B.; Edworthy,P.; Gupta,N.; Hoover,J.; Katzel,D.; Li,K.; Schobel,S.; Shrivastava,S.; Thovarai,V.; Wang,S.; Griesemer,S.B.; Bao,Y.; Sanders,R.; Zhdanov,S.; Kiryutin,B.; Lipman,D.J.; Tatusova,T.; St. George,K.
EPI520035	HA	United States	2012-Apr-08	B/New York/1348/2012		Other Database Import	Wentworth,D.E.; Halpin,R.A.; Lin,X.; Bera,J.; Akopov,A.; Ransier,A.; Mohan,M.; Fedorova,N.; Tsitrin,T.; Stockwell,T.; Amedeo,P.; Appalla,L.; Bishop,B.; Edworthy,P.; Gupta,N.; Hoover,J.; Katzel,D.; Li,K.; Schobel,S.; Shrivastava,S.; Thovarai,V.; Wang,S.; Griesemer,S.B.; Bao,Y.; Sanders,R.; Zhdanov,S.; Kiryutin,B.; Lipman,D.J.; Tatusova,T.; St. George,K.
EPI519875	HA	United States	2011-Apr-14	B/New York/1304/2011		Other Database Import	Wentworth,D.E.; Halpin,R.A.; Lin,X.; Bera,J.; Akopov,A.; Ransier,A.; Mohan,M.; Fedorova,N.; Tsitrin,T.; Stockwell,T.; Amedeo,P.; Appalla,L.; Bishop,B.; Edworthy,P.; Gupta,N.; Hoover,J.; Katzel,D.; Li,K.; Schobel,S.; Shrivastava,S.; Thovarai,V.; Wang,S.; Griesemer,S.B.; Bao,Y.; Sanders,R.; Zhdanov,S.; Kiryutin,B.; Lipman,D.J.; Tatusova,T.; St. George,K.
EPI519787	HA	United States	2011-Mar-08	B/New York/1290/2011		Other Database Import	Wentworth,D.E.; Halpin,R.A.; Lin,X.; Bera,J.; Akopov,A.; Ransier,A.; Mohan,M.; Fedorova,N.; Tsitrin,T.; Stockwell,T.; Amedeo,P.; Appalla,L.; Bishop,B.; Edworthy,P.; Gupta,N.; Hoover,J.; Katzel,D.; Li,K.; Schobel,S.; Shrivastava,S.; Thovarai,V.; Wang,S.; Griesemer,S.B.; Bao,Y.; Sanders,R.; Zhdanov,S.; Kiryutin,B.; Lipman,D.J.; Tatusova,T.; St. George,K.
EPI519747	HA	United States	2011-Feb-24	B/New York/1285/2011		Other Database Import	Wentworth,D.E.; Halpin,R.A.; Lin,X.; Bera,J.; Akopov,A.; Ransier,A.; Mohan,M.; Fedorova,N.; Tsitrin,T.; Stockwell,T.; Amedeo,P.; Appalla,L.; Bishop,B.; Edworthy,P.; Gupta,N.; Hoover,J.; Katzel,D.; Li,K.; Schobel,S.; Shrivastava,S.; Thovarai,V.; Wang,S.; Griesemer,S.B.; Bao,Y.; Sanders,R.; Zhdanov,S.; Kiryutin,B.; Lipman,D.J.; Tatusova,T.; St. George,K.
EPI519723	HA	United States	2011-Feb-25	B/New York/1282/2011		Other Database Import	Wentworth,D.E.; Halpin,R.A.; Lin,X.; Bera,J.; Akopov,A.; Ransier,A.; Mohan,M.; Fedorova,N.; Tsitrin,T.; Stockwell,T.; Amedeo,P.; Appalla,L.; Bishop,B.; Edworthy,P.; Gupta,N.; Hoover,J.; Katzel,D.; Li,K.; Schobel,S.; Shrivastava,S.; Thovarai,V.; Wang,S.; Griesemer,S.B.; Bao,Y.; Sanders,R.; Zhdanov,S.; Kiryutin,B.; Lipman,D.J.; Tatusova,T.; St. George,K.
EPI519467	HA	United States	2011-Jan-25	B/New York/1247/2011		Other Database Import	Wentworth,D.E.; Halpin,R.A.; Lin,X.; Bera,J.; Akopov,A.; Ransier,A.; Mohan,M.; Fedorova,N.; Tsitrin,T.; Stockwell,T.; Amedeo,P.; Appalla,L.; Bishop,B.; Edworthy,P.; Gupta,N.; Hoover,J.; Katzel,D.; Li,K.; Schobel,S.; Shrivastava,S.; Thovarai,V.; Wang,S.; Griesemer,S.B.; Bao,Y.; Sanders,R.; Zhdanov,S.; Kiryutin,B.; Lipman,D.J.; Tatusova,T.; St. George,K.
EPI519443	HA	United States	2010-Dec-26	B/New York/1243/2010		Other Database Import	Wentworth,D.E.; Halpin,R.A.; Lin,X.; Bera,J.; Akopov,A.; Ransier,A.; Mohan,M.; Fedorova,N.; Tsitrin,T.; Stockwell,T.; Amedeo,P.; Appalla,L.; Bishop,B.; Edworthy,P.; Gupta,N.; Hoover,J.; Katzel,D.; Li,K.; Schobel,S.; Shrivastava,S.; Thovarai,V.; Wang,S.; Griesemer,S.B.; Bao,Y.; Sanders,R.; Zhdanov,S.; Kiryutin,B.; Lipman,D.J.; Tatusova,T.; St. George,K.
EPI519395	HA	United States	2010-Feb-06	B/New York/1235/2009		Other Database Import	Wentworth,D.E.; Halpin,R.A.; Lin,X.; Bera,J.; Akopov,A.; Ransier,A.; Mohan,M.; Fedorova,N.; Tsitrin,T.; Stockwell,T.; Amedeo,P.; Appalla,L.; Bishop,B.; Edworthy,P.; Gupta,N.; Hoover,J.; Katzel,D.; Li,K.; Schobel,S.; Shrivastava,S.; Thovarai,V.; Wang,S.; Griesemer,S.B.; Bao,Y.; Sanders,R.; Zhdanov,S.; Kiryutin,B.; Lipman,D.J.; Tatusova,T.; St. George,K.
EPI519307	HA	United States	2009-Mar-05	B/New York/1215/2009		Other Database Import	Wentworth,D.E.; Halpin,R.A.; Lin,X.; Bera,J.; Akopov,A.; Ransier,A.; Mohan,M.; Fedorova,N.; Tsitrin,T.; Stockwell,T.; Amedeo,P.; Appalla,L.; Bishop,B.; Edworthy,P.; Gupta,N.; Hoover,J.; Katzel,D.; Li,K.; Schobel,S.; Shrivastava,S.; Thovarai,V.; Wang,S.; Griesemer,S.B.; Bao,Y.; Sanders,R.; Zhdanov,S.; Kiryutin,B.; Lipman,D.J.; Tatusova,T.; St. George,K.
EPI519155	HA	United States	2008-Mar-18	B/New York/1190/2008		Other Database Import	Wentworth,D.E.; Halpin,R.A.; Lin,X.; Bera,J.; Akopov,A.; Ransier,A.; Mohan,M.; Fedorova,N.; Tsitrin,T.; Stockwell,T.; Amedeo,P.; Appalla,L.; Bishop,B.; Edworthy,P.; Gupta,N.; Hoover,J.; Katzel,D.; Li,K.; Schobel,S.; Shrivastava,S.; Thovarai,V.; Wang,S.; Griesemer,S.B.; Bao,Y.; Sanders,R.; Zhdanov,S.; Kiryutin,B.; Lipman,D.J.; Tatusova,T.; St. George,K.
EPI519147	HA	United States	2008-Mar-16	B/New York/1189/2008		Other Database Import	Wentworth,D.E.; Halpin,R.A.; Lin,X.; Bera,J.; Akopov,A.; Ransier,A.; Mohan,M.; Fedorova,N.; Tsitrin,T.; Stockwell,T.; Amedeo,P.; Appalla,L.; Bishop,B.; Edworthy,P.; Gupta,N.; Hoover,J.; Katzel,D.; Li,K.; Schobel,S.; Shrivastava,S.; Thovarai,V.; Wang,S.; Griesemer,S.B.; Bao,Y.; Sanders,R.; Zhdanov,S.; Kiryutin,B.; Lipman,D.J.; Tatusova,T.; St. George,K.
EPI519083	HA	United States	2007-Dec-19	B/New York/1133/2007		Other Database Import	Wentworth,D.E.; Halpin,R.A.; Lin,X.; Bera,J.; Akopov,A.; Ransier,A.; Mohan,M.; Fedorova,N.; Tsitrin,T.; Stockwell,T.; Amedeo,P.; Appalla,L.; Bishop,B.; Edworthy,P.; Gupta,N.; Hoover,J.; Katzel,D.; Li,K.; Schobel,S.; Shrivastava,S.; Thovarai,V.; Wang,S.; Griesemer,S.B.; Bao,Y.; Sanders,R.; Zhdanov,S.; Kiryutin,B.; Lipman,D.J.; Tatusova,T.; St. George,K.
EPI519075	HA	United States	2007-Feb-26	B/New York/1127/2007		Other Database Import	Wentworth,D.E.; Halpin,R.A.; Lin,X.; Bera,J.; Akopov,A.; Ransier,A.; Mohan,M.; Fedorova,N.; Tsitrin,T.; Stockwell,T.; Amedeo,P.; Appalla,L.; Bishop,B.; Edworthy,P.; Gupta,N.; Hoover,J.; Katzel,D.; Li,K.; Schobel,S.; Shrivastava,S.; Thovarai,V.; Wang,S.; Griesemer,S.B.; Bao,Y.; Sanders,R.; Zhdanov,S.; Kiryutin,B.; Lipman,D.J.; Tatusova,T.; St. George,K.
EPI519051	HA	United States	2006-May-06	B/New York/1098/2006		Other Database Import	Wentworth,D.E.; Halpin,R.A.; Lin,X.; Bera,J.; Akopov,A.; Ransier,A.; Mohan,M.; Fedorova,N.; Tsitrin,T.; Stockwell,T.; Amedeo,P.; Appalla,L.; Bishop,B.; Edworthy,P.; Gupta,N.; Hoover,J.; Katzel,D.; Li,K.; Schobel,S.; Shrivastava,S.; Thovarai,V.; Wang,S.; Griesemer,S.B.; Bao,Y.; Sanders,R.; Zhdanov,S.; Kiryutin,B.; Lipman,D.J.; Tatusova,T.; St. George,K.
EPI518979	HA	United States	2008-Mar-06	B/New York/1177/2008		Other Database Import	Wentworth,D.E.; Halpin,R.A.; Lin,X.; Bera,J.; Akopov,A.; Ransier,A.; Mohan,M.; Fedorova,N.; Tsitrin,T.; Stockwell,T.; Amedeo,P.; Appalla,L.; Bishop,B.; Edworthy,P.; Gupta,N.; Hoover,J.; Katzel,D.; Li,K.; Schobel,S.; Shrivastava,S.; Thovarai,V.; Wang,S.; Griesemer,S.B.; Bao,Y.; Sanders,R.; Zhdanov,S.; Kiryutin,B.; Lipman,D.J.; Tatusova,T.; St. George,K.
EPI518971	HA	United States	2008-Mar-06	B/New York/1176/2008		Other Database Import	Wentworth,D.E.; Halpin,R.A.; Lin,X.; Bera,J.; Akopov,A.; Ransier,A.; Mohan,M.; Fedorova,N.; Tsitrin,T.; Stockwell,T.; Amedeo,P.; Appalla,L.; Bishop,B.; Edworthy,P.; Gupta,N.; Hoover,J.; Katzel,D.; Li,K.; Schobel,S.; Shrivastava,S.; Thovarai,V.; Wang,S.; Griesemer,S.B.; Bao,Y.; Sanders,R.; Zhdanov,S.; Kiryutin,B.; Lipman,D.J.; Tatusova,T.; St. George,K.
EPI518851	HA	United States	2008-Jan-23	B/New York/1161/2008		Other Database Import	Wentworth,D.E.; Halpin,R.A.; Lin,X.; Bera,J.; Akopov,A.; Ransier,A.; Mohan,M.; Fedorova,N.; Tsitrin,T.; Stockwell,T.; Amedeo,P.; Appalla,L.; Bishop,B.; Edworthy,P.; Gupta,N.; Hoover,J.; Katzel,D.; Li,K.; Schobel,S.; Shrivastava,S.; Thovarai,V.; Wang,S.; Griesemer,S.B.; Bao,Y.; Sanders,R.; Zhdanov,S.; Kiryutin,B.; Lipman,D.J.; Tatusova,T.; St. George,K.
EPI518803	HA	United States	2008-Feb-05	B/New York/1155/2008		Other Database Import	Wentworth,D.E.; Halpin,R.A.; Lin,X.; Bera,J.; Akopov,A.; Ransier,A.; Mohan,M.; Fedorova,N.; Tsitrin,T.; Stockwell,T.; Amedeo,P.; Appalla,L.; Bishop,B.; Edworthy,P.; Gupta,N.; Hoover,J.; Katzel,D.; Li,K.; Schobel,S.; Shrivastava,S.; Thovarai,V.; Wang,S.; Griesemer,S.B.; Bao,Y.; Sanders,R.; Zhdanov,S.; Kiryutin,B.; Lipman,D.J.; Tatusova,T.; St. George,K.
EPI518755	HA	United States	2008-Jan-28	B/New York/1148/2008		Other Database Import	Wentworth,D.E.; Halpin,R.A.; Lin,X.; Bera,J.; Akopov,A.; Ransier,A.; Mohan,M.; Fedorova,N.; Tsitrin,T.; Stockwell,T.; Amedeo,P.; Appalla,L.; Bishop,B.; Edworthy,P.; Gupta,N.; Hoover,J.; Katzel,D.; Li,K.; Schobel,S.; Shrivastava,S.; Thovarai,V.; Wang,S.; Griesemer,S.B.; Bao,Y.; Sanders,R.; Zhdanov,S.; Kiryutin,B.; Lipman,D.J.; Tatusova,T.; St. George,K.
EPI518691	HA	United States	2008-Jan-14	B/New York/1139/2008		Other Database Import	Wentworth,D.E.; Halpin,R.A.; Lin,X.; Bera,J.; Akopov,A.; Ransier,A.; Mohan,M.; Fedorova,N.; Tsitrin,T.; Stockwell,T.; Amedeo,P.; Appalla,L.; Bishop,B.; Edworthy,P.; Gupta,N.; Hoover,J.; Katzel,D.; Li,K.; Schobel,S.; Shrivastava,S.; Thovarai,V.; Wang,S.; Griesemer,S.B.; Bao,Y.; Sanders,R.; Zhdanov,S.; Kiryutin,B.; Lipman,D.J.; Tatusova,T.; St. George,K.
EPI518675	HA	United States	2008-Jan-15	B/New York/1137/2008		Other Database Import	Wentworth,D.E.; Halpin,R.A.; Lin,X.; Bera,J.; Akopov,A.; Ransier,A.; Mohan,M.; Fedorova,N.; Tsitrin,T.; Stockwell,T.; Amedeo,P.; Appalla,L.; Bishop,B.; Edworthy,P.; Gupta,N.; Hoover,J.; Katzel,D.; Li,K.; Schobel,S.; Shrivastava,S.; Thovarai,V.; Wang,S.; Griesemer,S.B.; Bao,Y.; Sanders,R.; Zhdanov,S.; Kiryutin,B.; Lipman,D.J.; Tatusova,T.; St. George,K.
EPI518587	HA	United States	2007-Mar-30	B/New York/1121/2007		Other Database Import	Wentworth,D.E.; Halpin,R.A.; Lin,X.; Bera,J.; Akopov,A.; Ransier,A.; Mohan,M.; Fedorova,N.; Tsitrin,T.; Stockwell,T.; Amedeo,P.; Appalla,L.; Bishop,B.; Edworthy,P.; Gupta,N.; Hoover,J.; Katzel,D.; Li,K.; Schobel,S.; Shrivastava,S.; Thovarai,V.; Wang,S.; Griesemer,S.B.; Bao,Y.; Sanders,R.; Zhdanov,S.; Kiryutin,B.; Lipman,D.J.; Tatusova,T.; St. George,K.
EPI518402	HA	United States	2006-May-10	B/New York/1090/2006		Other Database Import	Wentworth,D.E.; Halpin,R.A.; Lin,X.; Bera,J.; Akopov,A.; Ransier,A.; Mohan,M.; Fedorova,N.; Tsitrin,T.; Stockwell,T.; Amedeo,P.; Appalla,L.; Bishop,B.; Edworthy,P.; Gupta,N.; Hoover,J.; Katzel,D.; Li,K.; Schobel,S.; Shrivastava,S.; Thovarai,V.; Wang,S.; Griesemer,S.B.; Bao,Y.; Sanders,R.; Zhdanov,S.; Kiryutin,B.; Lipman,D.J.; Tatusova,T.; St. George,K.
EPI518354	HA	United States	2005-Feb-22	B/New York/1072/2005		Other Database Import	Wentworth,D.E.; Halpin,R.A.; Lin,X.; Bera,J.; Akopov,A.; Ransier,A.; Mohan,M.; Fedorova,N.; Tsitrin,T.; Stockwell,T.; Amedeo,P.; Appalla,L.; Bishop,B.; Edworthy,P.; Gupta,N.; Hoover,J.; Katzel,D.; Li,K.; Schobel,S.; Shrivastava,S.; Thovarai,V.; Wang,S.; Griesemer,S.B.; Bao,Y.; Sanders,R.; Zhdanov,S.; Kiryutin,B.; Lipman,D.J.; Tatusova,T.; St. George,K.
EPI518073	HA	United States	2001-Jan-23	B/New York/1034/2001		Other Database Import	Wentworth,D.E.; Halpin,R.A.; Lin,X.; Bera,J.; Akopov,A.; Ransier,A.; Mohan,M.; Fedorova,N.; Tsitrin,T.; Stockwell,T.; Amedeo,P.; Appalla,L.; Bishop,B.; Edworthy,P.; Gupta,N.; Hoover,J.; Katzel,D.; Li,K.; Schobel,S.; Shrivastava,S.; Thovarai,V.; Wang,S.; Griesemer,S.B.; Bao,Y.; Sanders,R.; Zhdanov,S.; Kiryutin,B.; Lipman,D.J.; Tatusova,T.; St. George,K.
EPI517796	HA	United States	2011-Mar-06	B/New York/1310/2011		Other Database Import	Wentworth,D.E.; Halpin,R.A.; Lin,X.; Bera,J.; Akopov,A.; Ransier,A.; Mohan,M.; Fedorova,N.; Tsitrin,T.; Stockwell,T.; Amedeo,P.; Appalla,L.; Bishop,B.; Edworthy,P.; Gupta,N.; Hoover,J.; Katzel,D.; Li,K.; Schobel,S.; Shrivastava,S.; Thovarai,V.; Wang,S.; Griesemer,S.B.; Bao,Y.; Sanders,R.; Zhdanov,S.; Kiryutin,B.; Lipman,D.J.; Tatusova,T.; St. George,K.
EPI517784	HA	United States	2011-Jan-26	B/New York/1308/2011		Other Database Import	Wentworth,D.E.; Halpin,R.A.; Lin,X.; Bera,J.; Akopov,A.; Ransier,A.; Mohan,M.; Fedorova,N.; Tsitrin,T.; Stockwell,T.; Amedeo,P.; Appalla,L.; Bishop,B.; Edworthy,P.; Gupta,N.; Hoover,J.; Katzel,D.; Li,K.; Schobel,S.; Shrivastava,S.; Thovarai,V.; Wang,S.; Griesemer,S.B.; Bao,Y.; Sanders,R.; Zhdanov,S.; Kiryutin,B.; Lipman,D.J.; Tatusova,T.; St. George,K.
EPI517717	HA	United States	2012-May-04	B/New York/1375/2012		Other Database Import	Wentworth,D.E.; Halpin,R.A.; Lin,X.; Bera,J.; Akopov,A.; Ransier,A.; Mohan,M.; Fedorova,N.; Tsitrin,T.; Stockwell,T.; Amedeo,P.; Appalla,L.; Bishop,B.; Edworthy,P.; Gupta,N.; Hoover,J.; Katzel,D.; Li,K.; Schobel,S.; Shrivastava,S.; Thovarai,V.; Wang,S.; Griesemer,S.B.; Bao,Y.; Sanders,R.; Zhdanov,S.; Kiryutin,B.; Lipman,D.J.; Tatusova,T.; St. George,K.
EPI517471	HA	United States	2013-Apr-28	B/Boston/YGB_01056/2013		Other Database Import	Wentworth,D.E.; Halpin,R.A.; Lin,X.; Bera,J.; Akopov,A.; Ransier,A.; Mohan,M.; Fedorova,N.; Tsitrin,T.; Stockwell,T.; Amedeo,P.; Appalla,L.; Bishop,B.; Edworthy,P.; Gupta,N.; Hoover,J.; Katzel,D.; Li,K.; Schobel,S.; Shrivastava,S.; Thovarai,V.; Wang,S.; Wilson,H.; Braidt,J.; Rosenberg,E.; Bao,Y.; Sanders,R.; Zhdanov,S.; Kiryutin,B.; Lipman,D.J.; Tatusova,T.; Grad,Y.
EPI517431	HA	United States	2013-Apr-17	B/Boston/YGB_01049/2013		Other Database Import	Wentworth,D.E.; Halpin,R.A.; Lin,X.; Bera,J.; Akopov,A.; Ransier,A.; Mohan,M.; Fedorova,N.; Tsitrin,T.; Stockwell,T.; Amedeo,P.; Appalla,L.; Bishop,B.; Edworthy,P.; Gupta,N.; Hoover,J.; Katzel,D.; Li,K.; Schobel,S.; Shrivastava,S.; Thovarai,V.; Wang,S.; Wilson,H.; Braidt,J.; Rosenberg,E.; Bao,Y.; Sanders,R.; Zhdanov,S.; Kiryutin,B.; Lipman,D.J.; Tatusova,T.; Grad,Y.
EPI517311	HA	United States	2013-Mar-31	B/Boston/YGB_01031/2013		Other Database Import	Wentworth,D.E.; Halpin,R.A.; Lin,X.; Bera,J.; Akopov,A.; Ransier,A.; Mohan,M.; Fedorova,N.; Tsitrin,T.; Stockwell,T.; Amedeo,P.; Appalla,L.; Bishop,B.; Edworthy,P.; Gupta,N.; Hoover,J.; Katzel,D.; Li,K.; Schobel,S.; Shrivastava,S.; Thovarai,V.; Wang,S.; Wilson,H.; Braidt,J.; Rosenberg,E.; Bao,Y.; Sanders,R.; Zhdanov,S.; Kiryutin,B.; Lipman,D.J.; Tatusova,T.; Grad,Y.
EPI517288	HA	United States	2013-Mar-21	B/Boston/YGB_01023/2013		Other Database Import	Wentworth,D.E.; Halpin,R.A.; Lin,X.; Bera,J.; Akopov,A.; Ransier,A.; Mohan,M.; Fedorova,N.; Tsitrin,T.; Stockwell,T.; Amedeo,P.; Appalla,L.; Bishop,B.; Edworthy,P.; Gupta,N.; Hoover,J.; Katzel,D.; Li,K.; Schobel,S.; Shrivastava,S.; Thovarai,V.; Wang,S.; Wilson,H.; Braidt,J.; Rosenberg,E.; Bao,Y.; Sanders,R.; Zhdanov,S.; Kiryutin,B.; Lipman,D.J.; Tatusova,T.; Grad,Y.
EPI517232	HA	United States	2013-Feb-23	B/Boston/YGB_01010/2013		Other Database Import	Wentworth,D.E.; Halpin,R.A.; Lin,X.; Bera,J.; Akopov,A.; Ransier,A.; Mohan,M.; Fedorova,N.; Tsitrin,T.; Stockwell,T.; Amedeo,P.; Appalla,L.; Bishop,B.; Edworthy,P.; Gupta,N.; Hoover,J.; Katzel,D.; Li,K.; Schobel,S.; Shrivastava,S.; Thovarai,V.; Wang,S.; Wilson,H.; Braidt,J.; Rosenberg,E.; Bao,Y.; Sanders,R.; Zhdanov,S.; Kiryutin,B.; Lipman,D.J.; Tatusova,T.; Grad,Y.
EPI517181	HA	United States	2013-May-01	B/Boston/YGB_01057/2013		Other Database Import	Wentworth,D.E.; Halpin,R.A.; Lin,X.; Bera,J.; Akopov,A.; Ransier,A.; Mohan,M.; Fedorova,N.; Tsitrin,T.; Stockwell,T.; Amedeo,P.; Appalla,L.; Bishop,B.; Edworthy,P.; Gupta,N.; Hoover,J.; Katzel,D.; Li,K.; Schobel,S.; Shrivastava,S.; Thovarai,V.; Wang,S.; Wilson,H.; Braidt,J.; Rosenberg,E.; Bao,Y.; Sanders,R.; Zhdanov,S.; Kiryutin,B.; Lipman,D.J.; Tatusova,T.; Grad,Y.
EPI517123	HA	Cameroon	2013-Oct-09	B/Cameroon/5643/2013	Centre Pasteur du Cameroun	National Institute for Medical Research
EPI516760	HA	United States	2014-Mar-05	B/Colorado/01/2014	Colorado Department of Health Lab	Centers for Disease Control and Prevention
EPI516640	HA	United States	2014-Mar-17	B/South Dakota/01/2014	South Dakota Public Health Lab	Centers for Disease Control and Prevention
EPI516405	HA	Japan	2014-Jan-31	B/KUMAMOTO-C/3/2014	Kumamoto City Environmental Research Center	National Institute of Infectious Diseases (NIID)	Takashita,Emi; Fujisaki,Seiichiro; Ejima,Miho; Odagiri,Takato
EPI516401	HA	Japan	2014-Feb-12	B/HIROSHIMA/9/2014	Center for Public Health and Environment, Hiroshima Prefectural Technology Research Institute	National Institute of Infectious Diseases (NIID)	Takashita,Emi; Fujisaki,Seiichiro; Ejima,Miho; Odagiri,Takato
EPI516393	HA	Japan	2014-Feb-14	B/YAMAGUCHI/12/2014	Yamaguchi Prefectural Institute of Public Health and Environment	National Institute of Infectious Diseases (NIID)	Takashita,Emi; Fujisaki,Seiichiro; Ejima,Miho; Odagiri,Takato
EPI516381	HA	Japan	2014-Jan-22	B/WAKAYAMA/14/2014	Wakayama Prefectural Research Center of Environment and Public Health	National Institute of Infectious Diseases (NIID)	Takashita,Emi; Fujisaki,Seiichiro; Ejima,Miho; Odagiri,Takato
EPI515549	HA	El Salvador	2013-Oct-30	B/El Salvador/2256/2013	Contiguo a Hospital Rosales	Centers for Disease Control and Prevention
EPI515521	HA	United States	2014-Feb-11	B/Nevada/02/2014	Southern Nevada Public Health Lab	Centers for Disease Control and Prevention
EPI515281	HA	Germany	2014-Feb-03	B/Sachsen/1/2014	Robert-Koch-Institute	National Institute for Medical Research
EPI515247	HA	Cameroon	2013-Nov-28	B/Cameroon/6788/2013	Centre Pasteur du Cameroun	National Institute for Medical Research
EPI511867	HA	United States	2014-Jan-27	B/Delaware/01/2014	Delaware Public Health Lab	Centers for Disease Control and Prevention
EPI511855	HA	United States	2014-Jan-11	B/Oklahoma/01/2014	Oklahoma State Department of Health	Centers for Disease Control and Prevention
EPI511852	HA	United States	2014-Jan-30	B/Wisconsin/02/2014	Wisconsin State Laboratory of Hygiene	Centers for Disease Control and Prevention
EPI511849	HA	United States	2014-Feb-01	B/Idaho/01/2014	State of Idaho Bureau of Laboratories	Centers for Disease Control and Prevention
EPI511829	HA	United States	2014-Jan-30	B/Nebraska/01/2014	Nebraska Public Health Lab	Centers for Disease Control and Prevention
EPI509450	HA	Mexico	2013-Oct-09	B/Mexico/3158/2013	Laboratorio de Virus Respiratorio	Centers for Disease Control and Prevention
EPI509432	HA	Bangladesh	2013-Nov-21	B/Bangladesh/2012/2013	Institute of Epidemiology Disease Control and Research (IEDCR) & Bangladesh National Influenza Centre (NIC)	Centers for Disease Control and Prevention
EPI508873	HA	Brazil	2014-Jan-08	B/São Paulo/1318/2014	Instituto Adolfo Lutz	Instituto Adolfo Lutz	Santos,Katia;Silva,Daniela;Benega,Margarete;Paulino,Renato;Santos,Cecilia;Paiva,Terezinha
EPI508405	HA	Pakistan	2013-May-29	B/Pakistan/19/2013	National Institute of Health	Centers for Disease Control and Prevention
EPI508385	HA	United States	2014-Jan-14	B/Florida/02/2014	Florida Department of Health-Tampa	Centers for Disease Control and Prevention
EPI507325	HA	Nepal	2012-Jan-01	B/Nepal/261/2012	National Public Health Laboratory	National Institute of Infectious Diseases (NIID)	Takashita,Emi; Fujisaki,Seiichiro; Itoh,Reiko; Miura,Mai; Ejima,Miho; Tashiro,Masato; Odagiri,Takato
EPI507315	HA	Nepal	2012-Jan-01	B/Nepal/197/2012	National Public Health Laboratory	National Institute of Infectious Diseases (NIID)	Takashita,Emi; Fujisaki,Seiichiro; Itoh,Reiko; Miura,Mai; Ejima,Miho; Tashiro,Masato; Odagiri,Takato
EPI507158	HA	United States	2013-Jan-09	B/Texas/02/2013	Centers for Disease Control and Prevention	National Institute of Infectious Diseases (NIID)	Takashita,Emi; Fujisaki,Seiichiro; Itoh,Reiko; Miura,Mai; Ejima,Miho; Tashiro,Masato; Odagiri,Takato
EPI505333	HA	Norway	2013-Dec-19	B/Norway/3324/2013	WHO National Influenza Centre	National Institute for Medical Research
EPI504581	HA	Mexico	2013-Oct-09	B/Mexico/3141/2013	Laboratorio de Virus Respiratorio	Centers for Disease Control and Prevention
EPI503781	HA	Norway	2013-Dec-17	B/Norway/65/2014	Molde Hospital, Laboratory for Medical Microbiology	Norwegian Institute of Public Health	Dudman, SG; Waalen, K; Hungnes, O
EPI503762	HA	Norway	2013-Dec-30	B/Norway/26/2014	Mikrobiologisk laboratorium, Sykehuset i Vestfold	Norwegian Institute of Public Health	Dudman SG, Waalen K, Hungnes O
EPI503564	HA	Hong Kong (SAR)	2013-Dec-07	B/Hong Kong/413/2013	Government Virus Unit	Centers for Disease Control and Prevention
EPI503172	HA	Australia	2011-Oct-31	B/Brisbane/121/2011		Other Database Import	Wentworth,D.E.; Halpin,R.A.; Lin,X.; Zhou,B.; Bera,J.; Ransier,A.; Fedorova,N.; Tsitrin,T.; McLellan,M.; Stockwell,T.; Amedeo,P.; Appalla,L.; Bishop,B.; Edworthy,P.; Gupta,N.; Hoover,J.; Katzel,D.; Li,K.; Schobel,S.; Shrivastava,S.; Thovarai,V.; Wang,S.; Barr,I.; Dhanasekaran,V.; Deng,Y.M.; Hurt,A.; Komadina,N.; Smith,G.; Bao,Y.; Sanders,R.; Dernovoy,D.; Kiryutin,B.; Lipman,D.J.; Tatusova,T.
EPI503117	HA	Australia	2004-Jul-21	B/Victoria/101/2004		Other Database Import	Wentworth,D.E.; Halpin,R.A.; Lin,X.; Zhou,B.; Bera,J.; Ransier,A.; Fedorova,N.; Tsitrin,T.; McLellan,M.; Stockwell,T.; Amedeo,P.; Appalla,L.; Bishop,B.; Edworthy,P.; Gupta,N.; Hoover,J.; Katzel,D.; Li,K.; Schobel,S.; Shrivastava,S.; Thovarai,V.; Wang,S.; Barr,I.; Dhanasekaran,V.; Deng,Y.M.; Hurt,A.; Komadina,N.; Smith,G.; Bao,Y.; Sanders,R.; Dernovoy,D.; Kiryutin,B.; Lipman,D.J.; Tatusova,T.
EPI503021	HA	Australia	2011-Apr-11	B/Townsville/4/2011		Other Database Import	Wentworth,D.E.; Halpin,R.A.; Lin,X.; Zhou,B.; Bera,J.; Ransier,A.; Fedorova,N.; Tsitrin,T.; McLellan,M.; Stockwell,T.; Amedeo,P.; Appalla,L.; Bishop,B.; Edworthy,P.; Gupta,N.; Hoover,J.; Katzel,D.; Li,K.; Schobel,S.; Shrivastava,S.; Thovarai,V.; Wang,S.; Barr,I.; Dhanasekaran,V.; Deng,Y.M.; Hurt,A.; Komadina,N.; Smith,G.; Bao,Y.; Sanders,R.; Dernovoy,D.; Kiryutin,B.; Lipman,D.J.; Tatusova,T.
EPI503013	HA	Australia	2011-Mar-09	B/Brisbane/15/2011		Other Database Import	Wentworth,D.E.; Halpin,R.A.; Lin,X.; Zhou,B.; Bera,J.; Ransier,A.; Fedorova,N.; Tsitrin,T.; McLellan,M.; Stockwell,T.; Amedeo,P.; Appalla,L.; Bishop,B.; Edworthy,P.; Gupta,N.; Hoover,J.; Katzel,D.; Li,K.; Schobel,S.; Shrivastava,S.; Thovarai,V.; Wang,S.; Barr,I.; Dhanasekaran,V.; Deng,Y.M.; Hurt,A.; Komadina,N.; Smith,G.; Bao,Y.; Sanders,R.; Dernovoy,D.; Kiryutin,B.; Lipman,D.J.; Tatusova,T.
EPI502916	HA	Australia	2010-Sep-18	B/Townsville/1/2010		Other Database Import	Wentworth,D.E.; Halpin,R.A.; Lin,X.; Zhou,B.; Bera,J.; Ransier,A.; Fedorova,N.; Tsitrin,T.; McLellan,M.; Stockwell,T.; Amedeo,P.; Appalla,L.; Bishop,B.; Edworthy,P.; Gupta,N.; Hoover,J.; Katzel,D.; Li,K.; Schobel,S.; Shrivastava,S.; Thovarai,V.; Wang,S.; Barr,I.; Dhanasekaran,V.; Deng,Y.M.; Hurt,A.; Komadina,N.; Smith,G.; Bao,Y.; Sanders,R.; Dernovoy,D.; Kiryutin,B.; Lipman,D.J.; Tatusova,T.
EPI502908	HA	Australia	2010-Aug-30	B/Brisbane/4/2010		Other Database Import	Wentworth,D.E.; Halpin,R.A.; Lin,X.; Zhou,B.; Bera,J.; Ransier,A.; Fedorova,N.; Tsitrin,T.; McLellan,M.; Stockwell,T.; Amedeo,P.; Appalla,L.; Bishop,B.; Edworthy,P.; Gupta,N.; Hoover,J.; Katzel,D.; Li,K.; Schobel,S.; Shrivastava,S.; Thovarai,V.; Wang,S.; Barr,I.; Dhanasekaran,V.; Deng,Y.M.; Hurt,A.; Komadina,N.; Smith,G.; Bao,Y.; Sanders,R.; Dernovoy,D.; Kiryutin,B.; Lipman,D.J.; Tatusova,T.
EPI502583	HA	Norway	2013-Dec-19	B/Norway/3323/2013	WHO National Influenza Centre	National Institute for Medical Research
EPI500375	HA	Sweden	2013-Dec-02	B/Stockholm/14/2013	Swedish Institute for Infectious Disease Control	National Institute for Medical Research
EPI499526	HA	United States	2013-May-23	B/Hawaii/3462/2013		Other Database Import	Connors,B.C.; Jones,S.L.; Bisaha,S.A.; Canas,L.C.; Baker,J.A.; Cosme,K.W.; Couch,M.R.; Garrett,C.M.; Weghorst,K.L.; Davis,M.G.; Hanson,J.F.; Yohannes,R.A.; Abshire,J.P.; DeMarcus,L.S.; Smith,J.P.; Fumia,K.F.; Zorich,S.C.; Macias,E.A.; Noe,J.C.; Sjoberg,P.A.
EPI499518	HA	Guam	2013-Apr-30	B/Guam/3454/2013		Other Database Import	Connors,B.C.; Jones,S.L.; Bisaha,S.A.; Canas,L.C.; Baker,J.A.; Cosme,K.W.; Couch,M.R.; Garrett,C.M.; Weghorst,K.L.; Davis,M.G.; Hanson,J.F.; Yohannes,R.A.; Abshire,J.P.; DeMarcus,L.S.; Smith,J.P.; Fumia,K.F.; Zorich,S.C.; Macias,E.A.; Noe,J.C.; Sjoberg,P.A.
EPI499265	HA	Kenya	2013-Jan-01	B/Kenya/142/2013	CDC-Kenya	Centers for Disease Control and Prevention
EPI499236	HA	United States	2013-Dec-06	B/New Hampshire/06/2013	New Hampshire Public Health Laboratories	Centers for Disease Control and Prevention
EPI499228	HA	Canada	2013-Nov-16	B/Ontario/RV2366/2013	National Microbiology Laboratory, Health Canada	Centers for Disease Control and Prevention
EPI499212	HA	Vietnam	2013-Oct-02	B/Vietnam/448/2013	National Institute of Hygiene and Epidemiology	Centers for Disease Control and Prevention
EPI499210	HA	Vietnam	2013-Sep-30	B/Vietnam/425/2013	National Institute of Hygiene and Epidemiology	Centers for Disease Control and Prevention
EPI499059	HA	China	2013-Nov-14	B/Anhui-Qiaocheng/1465/2013	WHO Chinese National Influenza Center	WHO Chinese National Influenza Center	Yu,Lan;Xiyan,Li;Xiang,Zhao;Yanhui,Cheng;minju,Tan;Weijuan,Huang;Dayan,Wang;Dexin,Li;Yuelong,Shu
EPI498768	HA	China	2013-Nov-14	B/Jiangsu-Chongchuan/12314/2013	WHO Chinese National Influenza Center	WHO Chinese National Influenza Center	Yu Lan,Xiyan Li,Xiang Zhao,Yanhui Cheng,minju Tan,Weijuan Huang,Dayan Wang,Dexin Li,Yuelong Shu
EPI498447	HA	Australia	2012-May-25	B/Malaysia/412/2012	WHO Collaborating Centre for Reference and Research on Influenza	National Institute for Medical Research
EPI498344	HA	Denmark	2013-Dec-12	B/Denmark/42/2013		Statens Serum Institute
EPI498038	HA	France	2011-Mar-21	B/Lyon/CHU/12.88/2011	CRR virus Influenza region Sud	National Institute for Medical Research
EPI497807	HA	China	2011-Apr-24	B/Nanjing/1177/2011		Other Database Import	Li,W.; Qi,X.; Luo,P.; Deng,F.; Qin,Y.; Tang,F.; Zhou,M.
EPI493771	HA	United States	2013-Feb-10	B/California/NHRC392826/2013		Other Database Import	Thammavong,H.; Balansay-Ames,M.; Hawksworth,A.; Myers,C.A.; Connors,B.; de Mattos,C.; Brice,G.
EPI493752	HA	United States	2013-Feb-05	B/California/NHRC392647/2013		Other Database Import	Thammavong,H.; Balansay-Ames,M.; Hawksworth,A.; Myers,C.A.; Connors,B.; de Mattos,C.; Brice,G.
EPI492760	HA	Japan	2013-Oct-08	B/WAKAYAMA/150/2013	Wakayama Prefectural Research Center of Environment and Public Health	National Institute of Infectious Diseases (NIID)	Takashita,Emi; Fujisaki,Seiichiro; Itoh,Reiko; Miura,Mai; Ejima,Miho; Tashiro,Masato; Odagiri,Takato
EPI492586	HA	Hong Kong (SAR)	2013-Oct-11	B/Hong Kong/315/2013	Government Virus Unit	Centers for Disease Control and Prevention
EPI491350	HA	Singapore	2013-Jun-17	B/SINGAPORE/KK492/2013	National Public Health Laboratory	WHO Collaborating Centre for Reference and Research on Influenza	Deng,Y-M; Iannello,P; Spirason,N; Jelley,L; Lau,H; Komadina,N
EPI491336	HA	Australia	2013-Aug-21	B/VICTORIA/605/2013	Monash Medical Centre	WHO Collaborating Centre for Reference and Research on Influenza	Deng,Y-M; Iannello,P; Spirason,N; Jelley,L; Lau,H; Komadina,N
EPI491193	HA	Australia	2013-Aug-03	B/VICTORIA/804/2013	Austin Health	WHO Collaborating Centre for Reference and Research on Influenza	Deng,Y-M; Iannello,P; Spirason,N; Jelley,L; Lau,H; Komadina,N
EPI491187	HA	Australia	2013-Jul-29	B/NEWCASTLE/1000/2013	Institute of Medical and Veterinary Science (IMVS)	WHO Collaborating Centre for Reference and Research on Influenza	Deng,Y-M; Iannello,P; Spirason,N; Jelley,L; Lau,H; Komadina,N
EPI491106	HA	Bahrain	2012-Dec-03	B/Bahrain/203/2012	Ministry of Health Bahrain	Centers for Disease Control and Prevention
EPI487009	HA	United States	2009-Feb-05	B/Texas/22/2009		Other Database Import
EPI486458	HA	Costa Rica	2013-Jul-30	B/Costa Rica/4914/2013	Laboratorio Nacional de Influenza	Centers for Disease Control and Prevention
EPI484921	HA	New Zealand	2008-May-23	B/Waikato/2/2008		Other Database Import	Wentworth,D.E.; Halpin,R.A.; Lin,X.; Zhou,B.; Bera,J.; Ransier,A.; Fedorova,N.; Tsitrin,T.; McLellan,M.; Stockwell,T.; Amedeo,P.; Appalla,L.; Bishop,B.; Edworthy,P.; Gupta,N.; Hoover,J.; Katzel,D.; Li,K.; Schobel,S.; Shrivastava,S.; Thovarai,V.; Wang,S.; Barr,I.; Dhanasekaran,V.; Deng,Y.M.; Hurt,A.; Komadina,N.; Smith,G.; Bao,Y.; Sanders,R.; Dernovoy,D.; Kiryutin,B.; Lipman,D.J.; Tatusova,T.
EPI484882	HA	New Zealand	2005-Jun-05	B/Christchurch/38/2005		Other Database Import	Wentworth,D.E.; Halpin,R.A.; Lin,X.; Zhou,B.; Bera,J.; Ransier,A.; Fedorova,N.; Tsitrin,T.; McLellan,M.; Stockwell,T.; Amedeo,P.; Appalla,L.; Bishop,B.; Edworthy,P.; Gupta,N.; Hoover,J.; Katzel,D.; Li,K.; Schobel,S.; Shrivastava,S.; Thovarai,V.; Wang,S.; Barr,I.; Dhanasekaran,V.; Deng,Y.M.; Hurt,A.; Komadina,N.; Smith,G.; Bao,Y.; Sanders,R.; Dernovoy,D.; Kiryutin,B.; Lipman,D.J.; Tatusova,T.
EPI484752	HA	New Zealand	2002-Aug-12	B/Waikato/15/2002		Other Database Import	Wentworth,D.E.; Halpin,R.A.; Lin,X.; Zhou,B.; Bera,J.; Ransier,A.; Fedorova,N.; Tsitrin,T.; McLellan,M.; Stockwell,T.; Amedeo,P.; Appalla,L.; Bishop,B.; Edworthy,P.; Gupta,N.; Hoover,J.; Katzel,D.; Li,K.; Schobel,S.; Shrivastava,S.; Thovarai,V.; Wang,S.; Barr,I.; Dhanasekaran,V.; Deng,Y.M.; Hurt,A.; Komadina,N.; Smith,G.; Bao,Y.; Sanders,R.; Dernovoy,D.; Kiryutin,B.; Lipman,D.J.; Tatusova,T.
EPI484709	HA	Australia	2011-Feb-28	B/Townsville/2/2011		Other Database Import	Wentworth,D.E.; Halpin,R.A.; Lin,X.; Zhou,B.; Bera,J.; Ransier,A.; Fedorova,N.; Tsitrin,T.; McLellan,M.; Stockwell,T.; Amedeo,P.; Appalla,L.; Bishop,B.; Edworthy,P.; Gupta,N.; Hoover,J.; Katzel,D.; Li,K.; Schobel,S.; Shrivastava,S.; Thovarai,V.; Wang,S.; Barr,I.; Dhanasekaran,V.; Deng,Y.M.; Hurt,A.; Komadina,N.; Smith,G.; Bao,Y.; Sanders,R.; Dernovoy,D.; Kiryutin,B.; Lipman,D.J.; Tatusova,T.
EPI484124	HA	Australia	2008-Sep-30	B/Sydney/111/2008		Other Database Import	Wentworth,D.E.; Halpin,R.A.; Lin,X.; Zhou,B.; Bera,J.; Ransier,A.; Fedorova,N.; Tsitrin,T.; McLellan,M.; Stockwell,T.; Amedeo,P.; Appalla,L.; Bishop,B.; Edworthy,P.; Gupta,N.; Hoover,J.; Katzel,D.; Li,K.; Schobel,S.; Shrivastava,S.; Thovarai,V.; Wang,S.; Barr,I.; Dhanasekaran,V.; Deng,Y.M.; Hurt,A.; Komadina,N.; Smith,G.; Bao,Y.; Sanders,R.; Dernovoy,D.; Kiryutin,B.; Lipman,D.J.; Tatusova,T.
EPI483956	HA	New Zealand	2008-Aug-11	B/Wellington/31/2008		Other Database Import	Wentworth,D.E.; Halpin,R.A.; Lin,X.; Zhou,B.; Bera,J.; Ransier,A.; Fedorova,N.; Tsitrin,T.; McLellan,M.; Stockwell,T.; Amedeo,P.; Appalla,L.; Bishop,B.; Edworthy,P.; Gupta,N.; Hoover,J.; Katzel,D.; Li,K.; Schobel,S.; Shrivastava,S.; Thovarai,V.; Wang,S.; Barr,I.; Dhanasekaran,V.; Deng,Y.M.; Hurt,A.; Komadina,N.; Smith,G.; Bao,Y.; Sanders,R.; Dernovoy,D.; Kiryutin,B.; Lipman,D.J.; Tatusova,T.
EPI483940	HA	Australia	2008-Aug-07	B/Sydney/76/2008		Other Database Import	Wentworth,D.E.; Halpin,R.A.; Lin,X.; Zhou,B.; Bera,J.; Ransier,A.; Fedorova,N.; Tsitrin,T.; McLellan,M.; Stockwell,T.; Amedeo,P.; Appalla,L.; Bishop,B.; Edworthy,P.; Gupta,N.; Hoover,J.; Katzel,D.; Li,K.; Schobel,S.; Shrivastava,S.; Thovarai,V.; Wang,S.; Barr,I.; Dhanasekaran,V.; Deng,Y.M.; Hurt,A.; Komadina,N.; Smith,G.; Bao,Y.; Sanders,R.; Dernovoy,D.; Kiryutin,B.; Lipman,D.J.; Tatusova,T.
EPI483924	HA	Australia	2008-Aug-06	B/Sydney/522/2008		Other Database Import	Wentworth,D.E.; Halpin,R.A.; Lin,X.; Zhou,B.; Bera,J.; Ransier,A.; Fedorova,N.; Tsitrin,T.; McLellan,M.; Stockwell,T.; Amedeo,P.; Appalla,L.; Bishop,B.; Edworthy,P.; Gupta,N.; Hoover,J.; Katzel,D.; Li,K.; Schobel,S.; Shrivastava,S.; Thovarai,V.; Wang,S.; Barr,I.; Dhanasekaran,V.; Deng,Y.M.; Hurt,A.; Komadina,N.; Smith,G.; Bao,Y.; Sanders,R.; Dernovoy,D.; Kiryutin,B.; Lipman,D.J.; Tatusova,T.
EPI483820	HA	Australia	2008-Jul-11	B/Sydney/62/2008		Other Database Import	Wentworth,D.E.; Halpin,R.A.; Lin,X.; Zhou,B.; Bera,J.; Ransier,A.; Fedorova,N.; Tsitrin,T.; McLellan,M.; Stockwell,T.; Amedeo,P.; Appalla,L.; Bishop,B.; Edworthy,P.; Gupta,N.; Hoover,J.; Katzel,D.; Li,K.; Schobel,S.; Shrivastava,S.; Thovarai,V.; Wang,S.; Barr,I.; Dhanasekaran,V.; Deng,Y.M.; Hurt,A.; Komadina,N.; Smith,G.; Bao,Y.; Sanders,R.; Dernovoy,D.; Kiryutin,B.; Lipman,D.J.; Tatusova,T.
EPI483804	HA	Australia	2008-Jul-09	B/Brisbane/31/2008		Other Database Import	Wentworth,D.E.; Halpin,R.A.; Lin,X.; Zhou,B.; Bera,J.; Ransier,A.; Fedorova,N.; Tsitrin,T.; McLellan,M.; Stockwell,T.; Amedeo,P.; Appalla,L.; Bishop,B.; Edworthy,P.; Gupta,N.; Hoover,J.; Katzel,D.; Li,K.; Schobel,S.; Shrivastava,S.; Thovarai,V.; Wang,S.; Barr,I.; Dhanasekaran,V.; Deng,Y.M.; Hurt,A.; Komadina,N.; Smith,G.; Bao,Y.; Sanders,R.; Dernovoy,D.; Kiryutin,B.; Lipman,D.J.; Tatusova,T.
EPI483796	HA	New Zealand	2008-Jul-09	B/Wellington/9/2008		Other Database Import	Wentworth,D.E.; Halpin,R.A.; Lin,X.; Zhou,B.; Bera,J.; Ransier,A.; Fedorova,N.; Tsitrin,T.; McLellan,M.; Stockwell,T.; Amedeo,P.; Appalla,L.; Bishop,B.; Edworthy,P.; Gupta,N.; Hoover,J.; Katzel,D.; Li,K.; Schobel,S.; Shrivastava,S.; Thovarai,V.; Wang,S.; Barr,I.; Dhanasekaran,V.; Deng,Y.M.; Hurt,A.; Komadina,N.; Smith,G.; Bao,Y.; Sanders,R.; Dernovoy,D.; Kiryutin,B.; Lipman,D.J.; Tatusova,T.
EPI483692	HA	Australia	2008-May-01	B/Brisbane/13/2008		Other Database Import	Wentworth,D.E.; Halpin,R.A.; Lin,X.; Zhou,B.; Bera,J.; Ransier,A.; Fedorova,N.; Tsitrin,T.; McLellan,M.; Stockwell,T.; Amedeo,P.; Appalla,L.; Bishop,B.; Edworthy,P.; Gupta,N.; Hoover,J.; Katzel,D.; Li,K.; Schobel,S.; Shrivastava,S.; Thovarai,V.; Wang,S.; Barr,I.; Dhanasekaran,V.; Deng,Y.M.; Hurt,A.; Komadina,N.; Smith,G.; Bao,Y.; Sanders,R.; Dernovoy,D.; Kiryutin,B.; Lipman,D.J.; Tatusova,T.
EPI483564	HA	Australia	2007-Oct-24	B/Victoria/514/2007		Other Database Import	Wentworth,D.E.; Halpin,R.A.; Lin,X.; Zhou,B.; Bera,J.; Ransier,A.; Fedorova,N.; Tsitrin,T.; McLellan,M.; Stockwell,T.; Amedeo,P.; Appalla,L.; Bishop,B.; Edworthy,P.; Gupta,N.; Hoover,J.; Katzel,D.; Li,K.; Schobel,S.; Shrivastava,S.; Thovarai,V.; Wang,S.; Barr,I.; Dhanasekaran,V.; Deng,Y.M.; Hurt,A.; Komadina,N.; Smith,G.; Bao,Y.; Sanders,R.; Dernovoy,D.; Kiryutin,B.; Lipman,D.J.; Tatusova,T.
EPI483388	HA	Australia	2007-Sep-03	B/Victoria/215/2007		Other Database Import	Wentworth,D.E.; Halpin,R.A.; Lin,X.; Zhou,B.; Bera,J.; Ransier,A.; Fedorova,N.; Tsitrin,T.; McLellan,M.; Stockwell,T.; Amedeo,P.; Appalla,L.; Bishop,B.; Edworthy,P.; Gupta,N.; Hoover,J.; Katzel,D.; Li,K.; Schobel,S.; Shrivastava,S.; Thovarai,V.; Wang,S.; Barr,I.; Dhanasekaran,V.; Deng,Y.M.; Hurt,A.; Komadina,N.; Smith,G.; Bao,Y.; Sanders,R.; Dernovoy,D.; Kiryutin,B.; Lipman,D.J.; Tatusova,T.
EPI483324	HA	Australia	2007-Aug-16	B/Sydney/201/2007		Other Database Import	Wentworth,D.E.; Halpin,R.A.; Lin,X.; Zhou,B.; Bera,J.; Ransier,A.; Fedorova,N.; Tsitrin,T.; McLellan,M.; Stockwell,T.; Amedeo,P.; Appalla,L.; Bishop,B.; Edworthy,P.; Gupta,N.; Hoover,J.; Katzel,D.; Li,K.; Schobel,S.; Shrivastava,S.; Thovarai,V.; Wang,S.; Barr,I.; Dhanasekaran,V.; Deng,Y.M.; Hurt,A.; Komadina,N.; Smith,G.; Bao,Y.; Sanders,R.; Dernovoy,D.; Kiryutin,B.; Lipman,D.J.; Tatusova,T.
EPI483188	HA	Australia	2007-May-20	B/Sydney/3/2007		Other Database Import	Wentworth,D.E.; Halpin,R.A.; Lin,X.; Zhou,B.; Bera,J.; Ransier,A.; Fedorova,N.; Tsitrin,T.; McLellan,M.; Stockwell,T.; Amedeo,P.; Appalla,L.; Bishop,B.; Edworthy,P.; Gupta,N.; Hoover,J.; Katzel,D.; Li,K.; Schobel,S.; Shrivastava,S.; Thovarai,V.; Wang,S.; Barr,I.; Dhanasekaran,V.; Deng,Y.M.; Hurt,A.; Komadina,N.; Smith,G.; Bao,Y.; Sanders,R.; Dernovoy,D.; Kiryutin,B.; Lipman,D.J.; Tatusova,T.
EPI483156	HA	Australia	2007-Mar-09	B/Brisbane/3/2007		Other Database Import	Wentworth,D.E.; Halpin,R.A.; Lin,X.; Zhou,B.; Bera,J.; Ransier,A.; Fedorova,N.; Tsitrin,T.; McLellan,M.; Stockwell,T.; Amedeo,P.; Appalla,L.; Bishop,B.; Edworthy,P.; Gupta,N.; Hoover,J.; Katzel,D.; Li,K.; Schobel,S.; Shrivastava,S.; Thovarai,V.; Wang,S.; Barr,I.; Dhanasekaran,V.; Deng,Y.M.; Hurt,A.; Komadina,N.; Smith,G.; Bao,Y.; Sanders,R.; Dernovoy,D.; Kiryutin,B.; Lipman,D.J.; Tatusova,T.
EPI483140	HA	Australia	2007-Jan-25	B/Brisbane/1/2007		Other Database Import	Wentworth,D.E.; Halpin,R.A.; Lin,X.; Zhou,B.; Bera,J.; Ransier,A.; Fedorova,N.; Tsitrin,T.; McLellan,M.; Stockwell,T.; Amedeo,P.; Appalla,L.; Bishop,B.; Edworthy,P.; Gupta,N.; Hoover,J.; Katzel,D.; Li,K.; Schobel,S.; Shrivastava,S.; Thovarai,V.; Wang,S.; Barr,I.; Dhanasekaran,V.; Deng,Y.M.; Hurt,A.; Komadina,N.; Smith,G.; Bao,Y.; Sanders,R.; Dernovoy,D.; Kiryutin,B.; Lipman,D.J.; Tatusova,T.
EPI483020	HA	Australia	2005-Oct-31	B/Brisbane/104/2005		Other Database Import	Wentworth,D.E.; Halpin,R.A.; Lin,X.; Zhou,B.; Bera,J.; Ransier,A.; Fedorova,N.; Tsitrin,T.; McLellan,M.; Stockwell,T.; Amedeo,P.; Appalla,L.; Bishop,B.; Edworthy,P.; Gupta,N.; Hoover,J.; Katzel,D.; Li,K.; Schobel,S.; Shrivastava,S.; Thovarai,V.; Wang,S.; Barr,I.; Dhanasekaran,V.; Deng,Y.M.; Hurt,A.; Komadina,N.; Smith,G.; Bao,Y.; Sanders,R.; Dernovoy,D.; Kiryutin,B.; Lipman,D.J.; Tatusova,T.
EPI482868	HA	Australia	2005-Aug-22	B/Sydney/23/2005		Other Database Import	Wentworth,D.E.; Halpin,R.A.; Lin,X.; Zhou,B.; Bera,J.; Ransier,A.; Fedorova,N.; Tsitrin,T.; McLellan,M.; Stockwell,T.; Amedeo,P.; Appalla,L.; Bishop,B.; Edworthy,P.; Gupta,N.; Hoover,J.; Katzel,D.; Li,K.; Schobel,S.; Shrivastava,S.; Thovarai,V.; Wang,S.; Barr,I.; Dhanasekaran,V.; Deng,Y.M.; Hurt,A.; Komadina,N.; Smith,G.; Bao,Y.; Sanders,R.; Dernovoy,D.; Kiryutin,B.; Lipman,D.J.; Tatusova,T.
EPI482849	HA	Burkina Faso	2013-Mar-20	B/Burkina Faso/901/2013	IRSS	Centers for Disease Control and Prevention
EPI482828	HA	China	2013-May-05	B/Guangdong-Duanzhou/1160/2013	WHO Chinese National Influenza Center	Centers for Disease Control and Prevention
EPI482574	HA	New Zealand	2005-Jun-09	B/Waikato/49/2005		Other Database Import	Wentworth,D.E.; Halpin,R.A.; Lin,X.; Zhou,B.; Bera,J.; Ransier,A.; Fedorova,N.; Tsitrin,T.; McLellan,M.; Stockwell,T.; Amedeo,P.; Appalla,L.; Bishop,B.; Edworthy,P.; Gupta,N.; Hoover,J.; Katzel,D.; Li,K.; Schobel,S.; Shrivastava,S.; Thovarai,V.; Wang,S.; Barr,I.; Dhanasekaran,V.; Deng,Y.M.; Hurt,A.; Komadina,N.; Smith,G.; Bao,Y.; Sanders,R.; Dernovoy,D.; Kiryutin,B.; Lipman,D.J.; Tatusova,T.
EPI482431	HA	Australia	2005-Jan-05	B/Victoria/2/2005		Other Database Import	Wentworth,D.E.; Halpin,R.A.; Lin,X.; Zhou,B.; Bera,J.; Ransier,A.; Fedorova,N.; Tsitrin,T.; McLellan,M.; Stockwell,T.; Amedeo,P.; Appalla,L.; Bishop,B.; Edworthy,P.; Gupta,N.; Hoover,J.; Katzel,D.; Li,K.; Schobel,S.; Shrivastava,S.; Thovarai,V.; Wang,S.; Barr,I.; Dhanasekaran,V.; Deng,Y.M.; Hurt,A.; Komadina,N.; Smith,G.; Bao,Y.; Sanders,R.; Dernovoy,D.; Kiryutin,B.; Lipman,D.J.; Tatusova,T.
EPI482335	HA	New Zealand	2004-Oct-21	B/Christchurch/335/2004		Other Database Import	Wentworth,D.E.; Halpin,R.A.; Lin,X.; Zhou,B.; Bera,J.; Ransier,A.; Fedorova,N.; Tsitrin,T.; McLellan,M.; Stockwell,T.; Amedeo,P.; Appalla,L.; Bishop,B.; Edworthy,P.; Gupta,N.; Hoover,J.; Katzel,D.; Li,K.; Schobel,S.; Shrivastava,S.; Thovarai,V.; Wang,S.; Barr,I.; Dhanasekaran,V.; Deng,Y.M.; Hurt,A.; Komadina,N.; Smith,G.; Bao,Y.; Sanders,R.; Dernovoy,D.; Kiryutin,B.; Lipman,D.J.; Tatusova,T.
EPI482240	HA	New Zealand	2004-Sep-29	B/Wellington/02/2004		Other Database Import	Wentworth,D.E.; Halpin,R.A.; Lin,X.; Zhou,B.; Bera,J.; Ransier,A.; Fedorova,N.; Tsitrin,T.; McLellan,M.; Stockwell,T.; Amedeo,P.; Appalla,L.; Bishop,B.; Edworthy,P.; Gupta,N.; Hoover,J.; Katzel,D.; Li,K.; Schobel,S.; Shrivastava,S.; Thovarai,V.; Wang,S.; Barr,I.; Dhanasekaran,V.; Deng,Y.M.; Hurt,A.; Komadina,N.; Smith,G.; Bao,Y.; Sanders,R.; Dernovoy,D.; Kiryutin,B.; Lipman,D.J.; Tatusova,T.
EPI482232	HA	Australia	2004-Sep-28	B/Brisbane/13/2004		Other Database Import	Wentworth,D.E.; Halpin,R.A.; Lin,X.; Zhou,B.; Bera,J.; Ransier,A.; Fedorova,N.; Tsitrin,T.; McLellan,M.; Stockwell,T.; Amedeo,P.; Appalla,L.; Bishop,B.; Edworthy,P.; Gupta,N.; Hoover,J.; Katzel,D.; Li,K.; Schobel,S.; Shrivastava,S.; Thovarai,V.; Wang,S.; Barr,I.; Dhanasekaran,V.; Deng,Y.M.; Hurt,A.; Komadina,N.; Smith,G.; Bao,Y.; Sanders,R.; Dernovoy,D.; Kiryutin,B.; Lipman,D.J.; Tatusova,T.
EPI482224	HA	Australia	2004-Sep-23	B/Victoria/509/2004		Other Database Import	Wentworth,D.E.; Halpin,R.A.; Lin,X.; Zhou,B.; Bera,J.; Ransier,A.; Fedorova,N.; Tsitrin,T.; McLellan,M.; Stockwell,T.; Amedeo,P.; Appalla,L.; Bishop,B.; Edworthy,P.; Gupta,N.; Hoover,J.; Katzel,D.; Li,K.; Schobel,S.; Shrivastava,S.; Thovarai,V.; Wang,S.; Barr,I.; Dhanasekaran,V.; Deng,Y.M.; Hurt,A.; Komadina,N.; Smith,G.; Bao,Y.; Sanders,R.; Dernovoy,D.; Kiryutin,B.; Lipman,D.J.; Tatusova,T.
EPI482101	HA	Australia	2004-Sep-16	B/Brisbane/12/2004		Other Database Import	Wentworth,D.E.; Halpin,R.A.; Lin,X.; Zhou,B.; Bera,J.; Ransier,A.; Fedorova,N.; Tsitrin,T.; McLellan,M.; Stockwell,T.; Amedeo,P.; Appalla,L.; Bishop,B.; Edworthy,P.; Gupta,N.; Hoover,J.; Katzel,D.; Li,K.; Schobel,S.; Shrivastava,S.; Thovarai,V.; Wang,S.; Barr,I.; Dhanasekaran,V.; Deng,Y.M.; Hurt,A.; Komadina,N.; Smith,G.; Bao,Y.; Sanders,R.; Dernovoy,D.; Kiryutin,B.; Lipman,D.J.; Tatusova,T.
EPI482000	HA	New Zealand	2004-Aug-30	B/Christchurch/33/2004		Other Database Import	Wentworth,D.E.; Halpin,R.A.; Lin,X.; Zhou,B.; Bera,J.; Ransier,A.; Fedorova,N.; Tsitrin,T.; McLellan,M.; Stockwell,T.; Amedeo,P.; Appalla,L.; Bishop,B.; Edworthy,P.; Gupta,N.; Hoover,J.; Katzel,D.; Li,K.; Schobel,S.; Shrivastava,S.; Thovarai,V.; Wang,S.; Barr,I.; Dhanasekaran,V.; Deng,Y.M.; Hurt,A.; Komadina,N.; Smith,G.; Bao,Y.; Sanders,R.; Dernovoy,D.; Kiryutin,B.; Lipman,D.J.; Tatusova,T.
EPI481876	HA	Australia	2003-Mar-08	B/Victoria/500/2003		Other Database Import	Wentworth,D.E.; Halpin,R.A.; Lin,X.; Zhou,B.; Bera,J.; Ransier,A.; Fedorova,N.; Tsitrin,T.; McLellan,M.; Stockwell,T.; Amedeo,P.; Appalla,L.; Bishop,B.; Edworthy,P.; Gupta,N.; Hoover,J.; Katzel,D.; Li,K.; Schobel,S.; Shrivastava,S.; Thovarai,V.; Wang,S.; Barr,I.; Dhanasekaran,V.; Deng,Y.M.; Hurt,A.; Komadina,N.; Smith,G.; Bao,Y.; Sanders,R.; Dernovoy,D.; Kiryutin,B.; Lipman,D.J.; Tatusova,T.
EPI481768	HA	Australia	2011-Oct-04	B/Victoria/855/2011		Other Database Import	Wentworth,D.E.; Halpin,R.A.; Lin,X.; Zhou,B.; Bera,J.; Ransier,A.; Fedorova,N.; Tsitrin,T.; McLellan,M.; Stockwell,T.; Amedeo,P.; Appalla,L.; Bishop,B.; Edworthy,P.; Gupta,N.; Hoover,J.; Katzel,D.; Li,K.; Schobel,S.; Shrivastava,S.; Thovarai,V.; Wang,S.; Barr,I.; Dhanasekaran,V.; Deng,Y.M.; Hurt,A.; Komadina,N.; Smith,G.; Bao,Y.; Sanders,R.; Dernovoy,D.; Kiryutin,B.; Lipman,D.J.; Tatusova,T.
EPI481705	HA	New Zealand	2011-Sep-08	B/Christchurch/54/2011		Other Database Import	Wentworth,D.E.; Halpin,R.A.; Lin,X.; Zhou,B.; Bera,J.; Ransier,A.; Fedorova,N.; Tsitrin,T.; McLellan,M.; Stockwell,T.; Amedeo,P.; Appalla,L.; Bishop,B.; Edworthy,P.; Gupta,N.; Hoover,J.; Katzel,D.; Li,K.; Schobel,S.; Shrivastava,S.; Thovarai,V.; Wang,S.; Barr,I.; Dhanasekaran,V.; Deng,Y.M.; Hurt,A.; Komadina,N.; Smith,G.; Bao,Y.; Sanders,R.; Dernovoy,D.; Kiryutin,B.; Lipman,D.J.; Tatusova,T.
EPI481641	HA	Australia	2011-Aug-25	B/Victoria/38/2011		Other Database Import	Wentworth,D.E.; Halpin,R.A.; Lin,X.; Zhou,B.; Bera,J.; Ransier,A.; Fedorova,N.; Tsitrin,T.; McLellan,M.; Stockwell,T.; Amedeo,P.; Appalla,L.; Bishop,B.; Edworthy,P.; Gupta,N.; Hoover,J.; Katzel,D.; Li,K.; Schobel,S.; Shrivastava,S.; Thovarai,V.; Wang,S.; Barr,I.; Dhanasekaran,V.; Deng,Y.M.; Hurt,A.; Komadina,N.; Smith,G.; Bao,Y.; Sanders,R.; Dernovoy,D.; Kiryutin,B.; Lipman,D.J.; Tatusova,T.
EPI481585	HA	New Zealand	2011-Aug-10	B/Christchurch/33/2011		Other Database Import	Wentworth,D.E.; Halpin,R.A.; Lin,X.; Zhou,B.; Bera,J.; Ransier,A.; Fedorova,N.; Tsitrin,T.; McLellan,M.; Stockwell,T.; Amedeo,P.; Appalla,L.; Bishop,B.; Edworthy,P.; Gupta,N.; Hoover,J.; Katzel,D.; Li,K.; Schobel,S.; Shrivastava,S.; Thovarai,V.; Wang,S.; Barr,I.; Dhanasekaran,V.; Deng,Y.M.; Hurt,A.; Komadina,N.; Smith,G.; Bao,Y.; Sanders,R.; Dernovoy,D.; Kiryutin,B.; Lipman,D.J.; Tatusova,T.
EPI481513	HA	New Zealand	2011-Jul-26	B/Auckland/44/2011		Other Database Import	Wentworth,D.E.; Halpin,R.A.; Lin,X.; Zhou,B.; Bera,J.; Ransier,A.; Fedorova,N.; Tsitrin,T.; McLellan,M.; Stockwell,T.; Amedeo,P.; Appalla,L.; Bishop,B.; Edworthy,P.; Gupta,N.; Hoover,J.; Katzel,D.; Li,K.; Schobel,S.; Shrivastava,S.; Thovarai,V.; Wang,S.; Barr,I.; Dhanasekaran,V.; Deng,Y.M.; Hurt,A.; Komadina,N.; Smith,G.; Bao,Y.; Sanders,R.; Dernovoy,D.; Kiryutin,B.; Lipman,D.J.; Tatusova,T.
EPI481281	HA	Australia	2011-Jun-06	B/Brisbane/32/2011		Other Database Import	Wentworth,D.E.; Halpin,R.A.; Lin,X.; Zhou,B.; Bera,J.; Ransier,A.; Fedorova,N.; Tsitrin,T.; McLellan,M.; Stockwell,T.; Amedeo,P.; Appalla,L.; Bishop,B.; Edworthy,P.; Gupta,N.; Hoover,J.; Katzel,D.; Li,K.; Schobel,S.; Shrivastava,S.; Thovarai,V.; Wang,S.; Barr,I.; Dhanasekaran,V.; Deng,Y.M.; Hurt,A.; Komadina,N.; Smith,G.; Bao,Y.; Sanders,R.; Dernovoy,D.; Kiryutin,B.; Lipman,D.J.; Tatusova,T.
EPI481169	HA	Australia	2011-Feb-04	B/Victoria/501/2011		Other Database Import	Wentworth,D.E.; Halpin,R.A.; Lin,X.; Zhou,B.; Bera,J.; Ransier,A.; Fedorova,N.; Tsitrin,T.; McLellan,M.; Stockwell,T.; Amedeo,P.; Appalla,L.; Bishop,B.; Edworthy,P.; Gupta,N.; Hoover,J.; Katzel,D.; Li,K.; Schobel,S.; Shrivastava,S.; Thovarai,V.; Wang,S.; Barr,I.; Dhanasekaran,V.; Deng,Y.M.; Hurt,A.; Komadina,N.; Smith,G.; Bao,Y.; Sanders,R.; Dernovoy,D.; Kiryutin,B.; Lipman,D.J.; Tatusova,T.
EPI480930	HA	Australia	2010-Sep-21	B/Brisbane/11/2010		Other Database Import	Wentworth,D.E.; Halpin,R.A.; Lin,X.; Zhou,B.; Bera,J.; Ransier,A.; Fedorova,N.; Tsitrin,T.; McLellan,M.; Stockwell,T.; Amedeo,P.; Appalla,L.; Bishop,B.; Edworthy,P.; Gupta,N.; Hoover,J.; Katzel,D.; Li,K.; Schobel,S.; Shrivastava,S.; Thovarai,V.; Wang,S.; Barr,I.; Dhanasekaran,V.; Deng,Y.M.; Hurt,A.; Komadina,N.; Smith,G.; Bao,Y.; Sanders,R.; Dernovoy,D.; Kiryutin,B.; Lipman,D.J.; Tatusova,T.
EPI480770	HA	Australia	2008-Sep-26	B/Victoria/226/2008		Other Database Import	Wentworth,D.E.; Halpin,R.A.; Lin,X.; Zhou,B.; Bera,J.; Ransier,A.; Fedorova,N.; Tsitrin,T.; McLellan,M.; Stockwell,T.; Amedeo,P.; Appalla,L.; Bishop,B.; Edworthy,P.; Gupta,N.; Hoover,J.; Katzel,D.; Li,K.; Schobel,S.; Shrivastava,S.; Thovarai,V.; Wang,S.; Barr,I.; Dhanasekaran,V.; Deng,Y.M.; Hurt,A.; Komadina,N.; Smith,G.; Bao,Y.; Sanders,R.; Dernovoy,D.; Kiryutin,B.; Lipman,D.J.; Tatusova,T.
EPI480658	HA	Australia	2008-Aug-23	B/Victoria/517/2008		Other Database Import	Wentworth,D.E.; Halpin,R.A.; Lin,X.; Zhou,B.; Bera,J.; Ransier,A.; Fedorova,N.; Tsitrin,T.; McLellan,M.; Stockwell,T.; Amedeo,P.; Appalla,L.; Bishop,B.; Edworthy,P.; Gupta,N.; Hoover,J.; Katzel,D.; Li,K.; Schobel,S.; Shrivastava,S.; Thovarai,V.; Wang,S.; Barr,I.; Dhanasekaran,V.; Deng,Y.M.; Hurt,A.; Komadina,N.; Smith,G.; Bao,Y.; Sanders,R.; Dernovoy,D.; Kiryutin,B.; Lipman,D.J.; Tatusova,T.
EPI480433	HA	Australia	2008-Jul-25	B/Sydney/91/2008		Other Database Import	Wentworth,D.E.; Halpin,R.A.; Lin,X.; Zhou,B.; Bera,J.; Ransier,A.; Fedorova,N.; Tsitrin,T.; McLellan,M.; Stockwell,T.; Amedeo,P.; Appalla,L.; Bishop,B.; Edworthy,P.; Gupta,N.; Hoover,J.; Katzel,D.; Li,K.; Schobel,S.; Shrivastava,S.; Thovarai,V.; Wang,S.; Barr,I.; Dhanasekaran,V.; Deng,Y.M.; Hurt,A.; Komadina,N.; Smith,G.; Bao,Y.; Sanders,R.; Dernovoy,D.; Kiryutin,B.; Lipman,D.J.; Tatusova,T.
EPI480394	HA	Australia	2008-Jul-14	B/Sydney/89/2008		Other Database Import	Wentworth,D.E.; Halpin,R.A.; Lin,X.; Zhou,B.; Bera,J.; Ransier,A.; Fedorova,N.; Tsitrin,T.; McLellan,M.; Stockwell,T.; Amedeo,P.; Appalla,L.; Bishop,B.; Edworthy,P.; Gupta,N.; Hoover,J.; Katzel,D.; Li,K.; Schobel,S.; Shrivastava,S.; Thovarai,V.; Wang,S.; Barr,I.; Dhanasekaran,V.; Deng,Y.M.; Hurt,A.; Komadina,N.; Smith,G.; Bao,Y.; Sanders,R.; Dernovoy,D.; Kiryutin,B.; Lipman,D.J.; Tatusova,T.
EPI480354	HA	Australia	2007-Sep-05	B/Victoria/217/2007		Other Database Import	Wentworth,D.E.; Halpin,R.A.; Lin,X.; Zhou,B.; Bera,J.; Ransier,A.; Fedorova,N.; Tsitrin,T.; McLellan,M.; Stockwell,T.; Amedeo,P.; Appalla,L.; Bishop,B.; Edworthy,P.; Gupta,N.; Hoover,J.; Katzel,D.; Li,K.; Schobel,S.; Shrivastava,S.; Thovarai,V.; Wang,S.; Barr,I.; Dhanasekaran,V.; Deng,Y.M.; Hurt,A.; Komadina,N.; Smith,G.; Bao,Y.; Sanders,R.; Dernovoy,D.; Kiryutin,B.; Lipman,D.J.; Tatusova,T.
EPI480290	HA	Australia	2007-Jul-27	B/Victoria/207/2007		Other Database Import	Wentworth,D.E.; Halpin,R.A.; Lin,X.; Zhou,B.; Bera,J.; Ransier,A.; Fedorova,N.; Tsitrin,T.; McLellan,M.; Stockwell,T.; Amedeo,P.; Appalla,L.; Bishop,B.; Edworthy,P.; Gupta,N.; Hoover,J.; Katzel,D.; Li,K.; Schobel,S.; Shrivastava,S.; Thovarai,V.; Wang,S.; Barr,I.; Dhanasekaran,V.; Deng,Y.M.; Hurt,A.; Komadina,N.; Smith,G.; Bao,Y.; Sanders,R.; Dernovoy,D.; Kiryutin,B.; Lipman,D.J.; Tatusova,T.
EPI479978	HA	Australia	2006-Jul-14	B/Brisbane/9/2006		Other Database Import	Wentworth,D.E.; Halpin,R.A.; Lin,X.; Zhou,B.; Bera,J.; Ransier,A.; Fedorova,N.; Tsitrin,T.; McLellan,M.; Stockwell,T.; Amedeo,P.; Appalla,L.; Bishop,B.; Edworthy,P.; Gupta,N.; Hoover,J.; Katzel,D.; Li,K.; Schobel,S.; Shrivastava,S.; Thovarai,V.; Wang,S.; Barr,I.; Dhanasekaran,V.; Deng,Y.M.; Hurt,A.; Komadina,N.; Smith,G.; Bao,Y.; Sanders,R.; Dernovoy,D.; Kiryutin,B.; Lipman,D.J.; Tatusova,T.
EPI479785	HA	Australia	2006-Jun-05	B/Victoria/101/2006		Other Database Import	Wentworth,D.E.; Halpin,R.A.; Lin,X.; Zhou,B.; Bera,J.; Ransier,A.; Fedorova,N.; Tsitrin,T.; McLellan,M.; Stockwell,T.; Amedeo,P.; Appalla,L.; Bishop,B.; Edworthy,P.; Gupta,N.; Hoover,J.; Katzel,D.; Li,K.; Schobel,S.; Shrivastava,S.; Thovarai,V.; Wang,S.; Barr,I.; Dhanasekaran,V.; Deng,Y.M.; Hurt,A.; Komadina,N.; Smith,G.; Bao,Y.; Sanders,R.; Dernovoy,D.; Kiryutin,B.; Lipman,D.J.; Tatusova,T.
EPI479768	HA	Australia	2006-May-30	B/Victoria/504/2006		Other Database Import	Wentworth,D.E.; Halpin,R.A.; Lin,X.; Zhou,B.; Bera,J.; Ransier,A.; Fedorova,N.; Tsitrin,T.; McLellan,M.; Stockwell,T.; Amedeo,P.; Appalla,L.; Bishop,B.; Edworthy,P.; Gupta,N.; Hoover,J.; Katzel,D.; Li,K.; Schobel,S.; Shrivastava,S.; Thovarai,V.; Wang,S.; Barr,I.; Dhanasekaran,V.; Deng,Y.M.; Hurt,A.; Komadina,N.; Smith,G.; Bao,Y.; Sanders,R.; Dernovoy,D.; Kiryutin,B.; Lipman,D.J.; Tatusova,T.
EPI479632	HA	Australia	2005-Sep-06	B/Sydney/15/2005		Other Database Import	Wentworth,D.E.; Halpin,R.A.; Lin,X.; Zhou,B.; Bera,J.; Ransier,A.; Fedorova,N.; Tsitrin,T.; McLellan,M.; Stockwell,T.; Amedeo,P.; Appalla,L.; Bishop,B.; Edworthy,P.; Gupta,N.; Hoover,J.; Katzel,D.; Li,K.; Schobel,S.; Shrivastava,S.; Thovarai,V.; Wang,S.; Barr,I.; Dhanasekaran,V.; Deng,Y.M.; Hurt,A.; Komadina,N.; Smith,G.; Bao,Y.; Sanders,R.; Dernovoy,D.; Kiryutin,B.; Lipman,D.J.; Tatusova,T.
EPI479599	HA	Australia	2005-Aug-31	B/Brisbane/60/2005		Other Database Import	Wentworth,D.E.; Halpin,R.A.; Lin,X.; Zhou,B.; Bera,J.; Ransier,A.; Fedorova,N.; Tsitrin,T.; McLellan,M.; Stockwell,T.; Amedeo,P.; Appalla,L.; Bishop,B.; Edworthy,P.; Gupta,N.; Hoover,J.; Katzel,D.; Li,K.; Schobel,S.; Shrivastava,S.; Thovarai,V.; Wang,S.; Barr,I.; Dhanasekaran,V.; Deng,Y.M.; Hurt,A.; Komadina,N.; Smith,G.; Bao,Y.; Sanders,R.; Dernovoy,D.; Kiryutin,B.; Lipman,D.J.; Tatusova,T.
EPI479456	HA	Australia	2005-Aug-05	B/Brisbane/36/2005		Other Database Import	Wentworth,D.E.; Halpin,R.A.; Lin,X.; Zhou,B.; Bera,J.; Ransier,A.; Fedorova,N.; Tsitrin,T.; McLellan,M.; Stockwell,T.; Amedeo,P.; Appalla,L.; Bishop,B.; Edworthy,P.; Gupta,N.; Hoover,J.; Katzel,D.; Li,K.; Schobel,S.; Shrivastava,S.; Thovarai,V.; Wang,S.; Barr,I.; Dhanasekaran,V.; Deng,Y.M.; Hurt,A.; Komadina,N.; Smith,G.; Bao,Y.; Sanders,R.; Dernovoy,D.; Kiryutin,B.; Lipman,D.J.; Tatusova,T.
EPI479264	HA	New Zealand	2005-Jul-01	B/Christchurch/120/2005		Other Database Import	Wentworth,D.E.; Halpin,R.A.; Lin,X.; Zhou,B.; Bera,J.; Ransier,A.; Fedorova,N.; Tsitrin,T.; McLellan,M.; Stockwell,T.; Amedeo,P.; Appalla,L.; Bishop,B.; Edworthy,P.; Gupta,N.; Hoover,J.; Katzel,D.; Li,K.; Schobel,S.; Shrivastava,S.; Thovarai,V.; Wang,S.; Barr,I.; Dhanasekaran,V.; Deng,Y.M.; Hurt,A.; Komadina,N.; Smith,G.; Bao,Y.; Sanders,R.; Dernovoy,D.; Kiryutin,B.; Lipman,D.J.; Tatusova,T.
EPI479184	HA	Australia	2005-Jun-13	B/Victoria/510/2005		Other Database Import	Wentworth,D.E.; Halpin,R.A.; Lin,X.; Zhou,B.; Bera,J.; Ransier,A.; Fedorova,N.; Tsitrin,T.; McLellan,M.; Stockwell,T.; Amedeo,P.; Appalla,L.; Bishop,B.; Edworthy,P.; Gupta,N.; Hoover,J.; Katzel,D.; Li,K.; Schobel,S.; Shrivastava,S.; Thovarai,V.; Wang,S.; Barr,I.; Dhanasekaran,V.; Deng,Y.M.; Hurt,A.; Komadina,N.; Smith,G.; Bao,Y.; Sanders,R.; Dernovoy,D.; Kiryutin,B.; Lipman,D.J.; Tatusova,T.
EPI478696	HA	Australia	2002-Jun-26	B/Victoria/506/2002		Other Database Import	Wentworth,D.E.; Halpin,R.A.; Lin,X.; Zhou,B.; Bera,J.; Ransier,A.; Fedorova,N.; Tsitrin,T.; McLellan,M.; Stockwell,T.; Amedeo,P.; Appalla,L.; Bishop,B.; Edworthy,P.; Gupta,N.; Hoover,J.; Katzel,D.; Li,K.; Schobel,S.; Shrivastava,S.; Thovarai,V.; Wang,S.; Barr,I.; Dhanasekaran,V.; Deng,Y.M.; Hurt,A.; Komadina,N.; Smith,G.; Bao,Y.; Sanders,R.; Dernovoy,D.; Kiryutin,B.; Lipman,D.J.; Tatusova,T.
EPI478552	HA	Australia	2002-Jun-13	B/Brisbane/8/2002		Other Database Import	Wentworth,D.E.; Halpin,R.A.; Lin,X.; Zhou,B.; Bera,J.; Ransier,A.; Fedorova,N.; Tsitrin,T.; McLellan,M.; Stockwell,T.; Amedeo,P.; Appalla,L.; Bishop,B.; Edworthy,P.; Gupta,N.; Hoover,J.; Katzel,D.; Li,K.; Schobel,S.; Shrivastava,S.; Thovarai,V.; Wang,S.; Barr,I.; Dhanasekaran,V.; Deng,Y.M.; Hurt,A.; Komadina,N.; Smith,G.; Bao,Y.; Sanders,R.; Dernovoy,D.; Kiryutin,B.; Lipman,D.J.; Tatusova,T.
EPI478504	HA	Australia	2002-Jun-06	B/Sydney/24/2002		Other Database Import	Wentworth,D.E.; Halpin,R.A.; Lin,X.; Zhou,B.; Bera,J.; Ransier,A.; Fedorova,N.; Tsitrin,T.; McLellan,M.; Stockwell,T.; Amedeo,P.; Appalla,L.; Bishop,B.; Edworthy,P.; Gupta,N.; Hoover,J.; Katzel,D.; Li,K.; Schobel,S.; Shrivastava,S.; Thovarai,V.; Wang,S.; Barr,I.; Dhanasekaran,V.; Deng,Y.M.; Hurt,A.; Komadina,N.; Smith,G.; Bao,Y.; Sanders,R.; Dernovoy,D.; Kiryutin,B.; Lipman,D.J.; Tatusova,T.
EPI478456	HA	Australia	2002-May-29	B/Victoria/127/2002		Other Database Import	Wentworth,D.E.; Halpin,R.A.; Lin,X.; Zhou,B.; Bera,J.; Ransier,A.; Fedorova,N.; Tsitrin,T.; McLellan,M.; Stockwell,T.; Amedeo,P.; Appalla,L.; Bishop,B.; Edworthy,P.; Gupta,N.; Hoover,J.; Katzel,D.; Li,K.; Schobel,S.; Shrivastava,S.; Thovarai,V.; Wang,S.; Barr,I.; Dhanasekaran,V.; Deng,Y.M.; Hurt,A.; Komadina,N.; Smith,G.; Bao,Y.; Sanders,R.; Dernovoy,D.; Kiryutin,B.; Lipman,D.J.; Tatusova,T.
EPI478408	HA	Australia	2002-May-21	B/Sydney/211/2002		Other Database Import	Wentworth,D.E.; Halpin,R.A.; Lin,X.; Zhou,B.; Bera,J.; Ransier,A.; Fedorova,N.; Tsitrin,T.; McLellan,M.; Stockwell,T.; Amedeo,P.; Appalla,L.; Bishop,B.; Edworthy,P.; Gupta,N.; Hoover,J.; Katzel,D.; Li,K.; Schobel,S.; Shrivastava,S.; Thovarai,V.; Wang,S.; Barr,I.; Dhanasekaran,V.; Deng,Y.M.; Hurt,A.; Komadina,N.; Smith,G.; Bao,Y.; Sanders,R.; Dernovoy,D.; Kiryutin,B.; Lipman,D.J.; Tatusova,T.
EPI478185	HA	Australia	2007-Aug-10	B/Sydney/5/2007		Other Database Import	Wentworth,D.E.; Halpin,R.A.; Lin,X.; Zhou,B.; Bera,J.; Ransier,A.; Fedorova,N.; Tsitrin,T.; McLellan,M.; Stockwell,T.; Amedeo,P.; Appalla,L.; Bishop,B.; Edworthy,P.; Gupta,N.; Hoover,J.; Katzel,D.; Li,K.; Schobel,S.; Shrivastava,S.; Thovarai,V.; Wang,S.; Barr,I.; Dhanasekaran,V.; Deng,Y.M.; Hurt,A.; Komadina,N.; Smith,G.; Bao,Y.; Sanders,R.; Dernovoy,D.; Kiryutin,B.; Lipman,D.J.; Tatusova,T.
EPI478026	HA	Australia	2004-Aug-27	B/Victoria/301/2004		Other Database Import	Wentworth,D.E.; Halpin,R.A.; Lin,X.; Zhou,B.; Bera,J.; Ransier,A.; Fedorova,N.; Tsitrin,T.; McLellan,M.; Stockwell,T.; Amedeo,P.; Appalla,L.; Bishop,B.; Edworthy,P.; Gupta,N.; Hoover,J.; Katzel,D.; Li,K.; Schobel,S.; Shrivastava,S.; Thovarai,V.; Wang,S.; Barr,I.; Dhanasekaran,V.; Deng,Y.M.; Hurt,A.; Komadina,N.; Smith,G.; Bao,Y.; Sanders,R.; Dernovoy,D.; Kiryutin,B.; Lipman,D.J.; Tatusova,T.
EPI478004	HA	Australia	2004-Jun-08	B/Sydney/1/2004		Other Database Import	Wentworth,D.E.; Halpin,R.A.; Lin,X.; Zhou,B.; Bera,J.; Ransier,A.; Fedorova,N.; Tsitrin,T.; McLellan,M.; Stockwell,T.; Amedeo,P.; Appalla,L.; Bishop,B.; Edworthy,P.; Gupta,N.; Hoover,J.; Katzel,D.; Li,K.; Schobel,S.; Shrivastava,S.; Thovarai,V.; Wang,S.; Barr,I.; Dhanasekaran,V.; Deng,Y.M.; Hurt,A.; Komadina,N.; Smith,G.; Bao,Y.; Sanders,R.; Dernovoy,D.; Kiryutin,B.; Lipman,D.J.; Tatusova,T.
EPI477949	HA	Australia	2011-Mar-02	B/Sydney/47/2011		Other Database Import	Wentworth,D.E.; Halpin,R.A.; Lin,X.; Zhou,B.; Bera,J.; Ransier,A.; Fedorova,N.; Tsitrin,T.; McLellan,M.; Stockwell,T.; Amedeo,P.; Appalla,L.; Bishop,B.; Edworthy,P.; Gupta,N.; Hoover,J.; Katzel,D.; Li,K.; Schobel,S.; Shrivastava,S.; Thovarai,V.; Wang,S.; Barr,I.; Dhanasekaran,V.; Deng,Y.M.; Hurt,A.; Komadina,N.; Smith,G.; Bao,Y.; Sanders,R.; Dernovoy,D.; Kiryutin,B.; Lipman,D.J.; Tatusova,T.
EPI477881	HA	New Zealand	2010-Aug-05	B/Christchurch/2/2010		Other Database Import	Wentworth,D.E.; Halpin,R.A.; Lin,X.; Zhou,B.; Bera,J.; Ransier,A.; Fedorova,N.; Tsitrin,T.; McLellan,M.; Stockwell,T.; Amedeo,P.; Appalla,L.; Bishop,B.; Edworthy,P.; Gupta,N.; Hoover,J.; Katzel,D.; Li,K.; Schobel,S.; Shrivastava,S.; Thovarai,V.; Wang,S.; Barr,I.; Dhanasekaran,V.; Deng,Y.M.; Hurt,A.; Komadina,N.; Smith,G.; Bao,Y.; Sanders,R.; Dernovoy,D.; Kiryutin,B.; Lipman,D.J.; Tatusova,T.
EPI477793	HA	New Zealand	2008-Jul-18	B/Auckland/48/2008		Other Database Import	Wentworth,D.E.; Halpin,R.A.; Lin,X.; Zhou,B.; Bera,J.; Ransier,A.; Fedorova,N.; Tsitrin,T.; McLellan,M.; Stockwell,T.; Amedeo,P.; Appalla,L.; Bishop,B.; Edworthy,P.; Gupta,N.; Hoover,J.; Katzel,D.; Li,K.; Schobel,S.; Shrivastava,S.; Thovarai,V.; Wang,S.; Barr,I.; Dhanasekaran,V.; Deng,Y.M.; Hurt,A.; Komadina,N.; Smith,G.; Bao,Y.; Sanders,R.; Dernovoy,D.; Kiryutin,B.; Lipman,D.J.; Tatusova,T.
EPI477704	HA	New Zealand	2005-Aug-26	B/Christchurch/263/2005		Other Database Import	Wentworth,D.E.; Halpin,R.A.; Lin,X.; Zhou,B.; Bera,J.; Ransier,A.; Fedorova,N.; Tsitrin,T.; McLellan,M.; Stockwell,T.; Amedeo,P.; Appalla,L.; Bishop,B.; Edworthy,P.; Gupta,N.; Hoover,J.; Katzel,D.; Li,K.; Schobel,S.; Shrivastava,S.; Thovarai,V.; Wang,S.; Barr,I.; Dhanasekaran,V.; Deng,Y.M.; Hurt,A.; Komadina,N.; Smith,G.; Bao,Y.; Sanders,R.; Dernovoy,D.; Kiryutin,B.; Lipman,D.J.; Tatusova,T.
EPI477530	HA	Australia	2013-Apr-20	B/TASMANIA/1/2013	Royal Hobart Hospital	WHO Collaborating Centre for Reference and Research on Influenza	Deng,Y-M.; Iannello,P.;Caldwell,N.;Jelley,L.;Komadina,N.
EPI477511	HA	Sri Lanka	2013-Jan-15	B/SRI LANKA/2/2013	Medical Research Institute	WHO Collaborating Centre for Reference and Research on Influenza	Deng,Y-M., Iannello,P., Caldwell,N., Lau, H.,Komadina,N.
EPI477379	HA	Lithuania	2013-Mar-12	B/Lithuania/7848/2013	Lithuanian AIDS Center Laboratory	National Institute for Medical Research
EPI477373	HA	Lithuania	2013-Mar-05	B/Lithuania/6931/2013	Lithuanian AIDS Center Laboratory	National Institute for Medical Research
EPI476993	HA	Brazil	2013-Apr-11	B/São Paulo/27818/2013	Instituto Adolfo Lutz	Instituto Adolfo Lutz	Santos,Katia;Silva,Daniela;Benega,Margarete;Paulino,Renato;Santos,Cecilia;Paiva,Terezinha
EPI476989	HA	Brazil	2013-Apr-24	B/Mato Grosso/31935/2013	Instituto Adolfo Lutz	Instituto Adolfo Lutz	Santos,Katia;Silva,Daniela;Benega,Margarete;Paulino,Renato;Santos,Cecilia;Paiva,Terezinha
EPI473771	HA	Russian Federation	2013-Apr-16	B/Novgorod/92/2013	Ivanovsky Research Institute of Virology RAMS	Centers for Disease Control and Prevention
EPI468522	HA	Taiwan	2013-May-10	B/Taiwan/13/2013	Center for Disease Control	National Institute of Infectious Diseases (NIID)	Fujisaki,Seiichiro; Itoh,Reiko; Miura,Mai; Tashiro,Masato; Odagiri,Takato
EPI468325	HA	Norway	2013-Apr-12	B/Norway/2163/2013	St. Olavs Hospital HF, Dept. of Medical Microbiology	Norwegian Institute of Public Health	Dudman, SG; Waalen, K; Hungnes, O
EPI468104	HA	Uruguay	2013-Jun-10	B/Uruguay/177/2013	Departamento de Laboratorio de Salud Publica	Centers for Disease Control and Prevention
EPI468090	HA	Brazil	2013-Jun-25	B/Brazil/6004/2013	Instituto Adolfo Lutz	Centers for Disease Control and Prevention
EPI468147	HA	Bolivia, Plurinationial State of	2013-May-07	B/Bolivia/522/2013	CENETROP	Centers for Disease Control and Prevention
EPI468024	HA	Senegal	2013-Apr-03	B/Dakar/13/2013	Institut Pasteur de Dakar	National Institute for Medical Research
EPI467175	HA	South Africa	2013-Jun-03	B/South Africa/3786/2013	Sandringham, National Institute for Communicable D	National Institute for Medical Research
EPI467136	HA	Madagascar	2013-Apr-22	B/Madagascar/01481/2013	Institut Pasteur de Madagascar	National Institute for Medical Research
EPI467132	HA	Jordan	2013-Feb-28	B/Jordan/30169/2013	Laboratory Directorate	National Institute for Medical Research
EPI466148	HA	New Zealand	2013-May-14	B/CHRISTCHURCH/503/2013	Canterbury Health Services	WHO Collaborating Centre for Reference and Research on Influenza	Deng,Y-M., Iannello,P., Caldwell,N., Lau, H.,Komadina,N.
EPI466136	HA	Australia	2013-Jun-05	B/CANBERRA/5/2013	Canberra Hospital	WHO Collaborating Centre for Reference and Research on Influenza	Deng,Y-M., Iannello,P., Caldwell,N., Lau, H.,Komadina,N.
EPI465974	HA	France	2013-Mar-26	B/Paris/1451/2013	Institut Pasteur	Institut Pasteur	D,BRIAND;V,ENOUF
EPI465935	HA	Brazil	2013-May-17	B/Brazil/325/2013	Oswaldo Cruz Institute - FIOCRUZ - Laboratory of Respiratory Viruses and Measles (LVRS)	Centers for Disease Control and Prevention
EPI465877	HA	France	2013-Mar-23	B/Haute Normandie/1452/2013	Institut Pasteur	Institut Pasteur	D,BRIAND;V,ENOUF
EPI465225	HA	Japan	2013-May-01	B/TOKYO/30018/2013	Tokyo Metropolitan Institute of Public Health	National Institute of Infectious Diseases (NIID)	Fujisaki,Seiichiro; Itoh,Reiko; Miura,Mai; Tashiro,Masato; Odagiri,Takato
EPI464960	HA	Romania	2013-Mar-22	B/Iasi/138230/2013		Cantacuzino Institute	Necula, G.; Ustea, L.; Oprea, M.; Dinu, S.; Lupulescu, E.
EPI464775	HA	Sweden	2013-Feb-16	B/Stockholm/12/2013	Swedish Institute for Infectious Disease Control	National Institute for Medical Research
EPI464757	HA	Italy	2013-Feb-19	B/Milano/101/2013	Istituto Superiore di Sanità	National Institute for Medical Research
EPI464753	HA	Portugal	2013-Feb-13	B/Lisboa_PT/72/2013	Instituto Nacional de Saude	National Institute for Medical Research
EPI464410	HA	Lao, People's Democratic Republic	2013-Jan-11	B/Laos/011/2013	National Center for Laboratory and Epidemiology	Centers for Disease Control and Prevention
EPI463629	HA	Vietnam	2012-Oct-30	B/Vietnam/VP12-98/2012	Pasteur Institute, Influenza Laboratory	National Institute of Infectious Diseases (NIID)	Fujisaki,Seiichiro; Itoh,Reiko; Miura,Mai; Tashiro,Masato; Odagiri,Takato
EPI462457	HA	Tanzania, United Republic of	2013-Feb-28	B/Tanzania/404/2013	National Influenza Lab	Centers for Disease Control and Prevention
EPI462184	HA	United States	2013-Apr-11	B/New York/3392/2013		Other Database Import	Connors,B.C.; Jones,S.L.; Sanow,A.D.; Bisaha,S.A.; Canas,L.C.; Baker,J.A.; Cosme,K.W.; Couch,M.R.; Garrett,C.M.; Weghorst,K.L.; Davis,M.G.; Hanson,J.F.; Yohannes,R.A.; Abshire,J.P.; DeMarcus,L.S.; LLoyd,L.V.; Seidel,A.K.; Smith,J.P.; Fumia,K.F.; Zorich,S.C.; Macias,E.A.; Noe,J.C.; Sjoberg,P.A.
EPI462127	HA	United States	2013-Mar-13	B/Alaska/3335/2013		Other Database Import	Connors,B.C.; Jones,S.L.; Sanow,A.D.; Bisaha,S.A.; Canas,L.C.; Baker,J.A.; Cosme,K.W.; Couch,M.R.; Garrett,C.M.; Weghorst,K.L.; Davis,M.G.; Hanson,J.F.; Yohannes,R.A.; Abshire,J.P.; DeMarcus,L.S.; LLoyd,L.V.; Seidel,A.K.; Smith,J.P.; Fumia,K.F.; Zorich,S.C.; Macias,E.A.; Noe,J.C.; Sjoberg,P.A.
EPI462124	HA	United States	2013-Mar-11	B/Kentucky/3332/2013		Other Database Import	Connors,B.C.; Jones,S.L.; Sanow,A.D.; Bisaha,S.A.; Canas,L.C.; Baker,J.A.; Cosme,K.W.; Couch,M.R.; Garrett,C.M.; Weghorst,K.L.; Davis,M.G.; Hanson,J.F.; Yohannes,R.A.; Abshire,J.P.; DeMarcus,L.S.; LLoyd,L.V.; Seidel,A.K.; Smith,J.P.; Fumia,K.F.; Zorich,S.C.; Macias,E.A.; Noe,J.C.; Sjoberg,P.A.
EPI462113	HA	United States	2013-Feb-15	B/Dictrict of Columbia/3321/2013		Other Database Import	Connors,B.C.; Jones,S.L.; Sanow,A.D.; Bisaha,S.A.; Canas,L.C.; Baker,J.A.; Cosme,K.W.; Couch,M.R.; Garrett,C.M.; Weghorst,K.L.; Davis,M.G.; Hanson,J.F.; Yohannes,R.A.; Abshire,J.P.; DeMarcus,L.S.; LLoyd,L.V.; Seidel,A.K.; Smith,J.P.; Fumia,K.F.; Zorich,S.C.; Macias,E.A.; Noe,J.C.; Sjoberg,P.A.
EPI461942	HA	Ukraine	2013-Mar-04	B/Ukraine/5897/2013	Ministry of Health of Ukraine	National Institute for Medical Research
EPI461284	HA	Thailand	2010-Apr-29	B/Thailand/CU-H1896/2010		Other Database Import	Suwannakarn,K.; Vichaiwattana,P.; Korkong,S.; Theamboonlers,A.; Poovorawan,Y.
EPI460916	HA	Japan	2013-May-02	B/TOCHIGI/3/2013	Tochigi Prefectural Institute of Public Health and Environmental Science	National Institute of Infectious Diseases (NIID)	Fujisaki,Seiichiro; Itoh,Reiko; Miura,Mai; Tashiro,Masato; Odagiri,Takato
EPI460849	HA	Japan	2013-Apr-03	B/SHIZUOKA/111/2013	Shizuoka Institute of Environment and Hygiene	National Institute of Infectious Diseases (NIID)	Fujisaki,Seiichiro; Itoh,Reiko; Miura,Mai; Tashiro,Masato; Odagiri,Takato
EPI460638	HA	Spain	2013-Mar-13	B/Valladolid/93/2013	Universidad de Valladolid	National Institute for Medical Research
EPI459744	HA	United States	2013-Apr-18	B/New Jersey/08/2013	New Jersey Department of Health & Senior Services	Centers for Disease Control and Prevention
EPI457589	HA	United States	2013-Mar-01	B/Michigan/01/2013	Michigan Department of Community Health	Centers for Disease Control and Prevention
EPI456630	HA	Japan	2013-Apr-30	B/YAMAGUCHI/17/2013	Yamaguchi Prefectural Institute of Public Health and Environment	National Institute of Infectious Diseases (NIID)	Fujisaki,Seiichiro; Itoh,Reiko; Miura,Mai; Tashiro,Masato; Odagiri,Takato
EPI453250	HA	Spain	2013-Mar-18	B/Catalonia/6263S/2013	Hospital Clínic	Hospital Clínic de Barcelona	Mosquera, MM.; Isanta, R.; Marcos, MA.; Vila, J.
EPI452241	HA	United States	2013-Apr-04	B/North Carolina/06/2013	North Carolina State Laboratory of Public Health	Centers for Disease Control and Prevention
EPI450699	HA	Bulgaria	2013-Feb-23	B/Bulgaria/505/2013	National Centre of Infectious and	National Institute for Medical Research
EPI450374	HA	Australia	2013-Jan-01	B/SOUTH AUSTRALIA/9/2013	Institute of Medical and Veterinary Science (IMVS)	WHO Collaborating Centre for Reference and Research on Influenza	Deng,Y-M., Iannello,P.,Caldwell,N., Jelley,L.,Komadina,N.
EPI450359	HA	Singapore	2012-Nov-16	B/SINGAPORE/41/2012	National Public Health Laboratory	WHO Collaborating Centre for Reference and Research on Influenza	Deng,Y-M., Iannello,P.,Caldwell,N., Jelley,L.,Komadina,N.
EPI450320	HA	Australia	2013-Jan-07	B/BRISBANE/1/2013	Queensland Health Scientific Services	WHO Collaborating Centre for Reference and Research on Influenza	Deng,Y-M; Iannello,P;Caldwell,N; Jelley,L;Komadina,N.
EPI446640	HA	United States	2013-Jan-17	B/Nevada/3289/2013		Other Database Import	Connors,B.C.; Jones,S.L.; Sanow,A.D.; Bisaha,S.A.; Canas,L.C.; Baker,J.A.; Cosme,K.W.; Couch,M.R.; Garrett,C.M.; Weghorst,K.L.; Davis,M.G.; Hanson,J.F.; Yohannes,R.A.; Abshire,J.P.; DeMarcus,L.S.; LLoyd,L.V.; Seidel,A.K.; Smith,J.P.; Macintosh,V.H.; Fumia,K.F.; Zorich,S.C.; Macias,E.A.; Noe,J.C.; Sjoberg,P.A.
EPI446629	HA	United States	2013-Jan-17	B/Louisiana/3284/2013		Other Database Import	Connors,B.C.; Jones,S.L.; Sanow,A.D.; Bisaha,S.A.; Canas,L.C.; Baker,J.A.; Cosme,K.W.; Couch,M.R.; Garrett,C.M.; Weghorst,K.L.; Davis,M.G.; Hanson,J.F.; Yohannes,R.A.; Abshire,J.P.; DeMarcus,L.S.; LLoyd,L.V.; Seidel,A.K.; Smith,J.P.; Macintosh,V.H.; Fumia,K.F.; Zorich,S.C.; Macias,E.A.; Noe,J.C.; Sjoberg,P.A.
EPI446619	HA	United States	2012-Dec-20	B/Florida/3274/2012		Other Database Import	Connors,B.C.; Jones,S.L.; Sanow,A.D.; Bisaha,S.A.; Canas,L.C.; Baker,J.A.; Cosme,K.W.; Couch,M.R.; Garrett,C.M.; Weghorst,K.L.; Davis,M.G.; Hanson,J.F.; Yohannes,R.A.; Abshire,J.P.; DeMarcus,L.S.; LLoyd,L.V.; Seidel,A.K.; Smith,J.P.; Macintosh,V.H.; Fumia,K.F.; Zorich,S.C.; Macias,E.A.; Noe,J.C.; Sjoberg,P.A.
EPI445973	HA	Ukraine	2012-Dec-12	B/Ukraine/5621/2012	Ministry of Health of Ukraine	National Institute for Medical Research
EPI445943	HA	Iran, Islamic Republic of	2012-Dec-26	B/Ghom/26191/2012	Tehran University of Medical Sciences	National Institute for Medical Research
EPI445933	HA	United Kingdom	2013-Feb-04	B/England/213/2013	Health Protection Agency	National Institute for Medical Research
EPI445917	HA	Madagascar	2012-Jul-31	B/Antsirabe/4171/2012	Institut Pasteur de Madagascar	National Institute for Medical Research
EPI443755	HA	United States	2013-Mar-03	B/North Dakota/02/2013	North Dakota Department of Health	Centers for Disease Control and Prevention
EPI443736	HA	United States	2013-Mar-02	B/North Carolina/02/2013	North Carolina State Laboratory of Public Health	Centers for Disease Control and Prevention
EPI442991	HA	Sweden	2013-Feb-21	B/Stockholm/9/2013		Swedish Institute for Infectious Disease Control
EPI442704	HA	United States	2013-Jan-09	B/Texas/02/2013	Texas Department of State Health Services-Laboratory Services	Centers for Disease Control and Prevention
EPI440055	HA	United States	2013-Feb-07	B/Ohio/02/2013	Ohio Department of Health Laboratories	Centers for Disease Control and Prevention
EPI440025	HA	Kenya	2012-Aug-02	B/Kenya/1577/2012	CDC-Kenya	Centers for Disease Control and Prevention
EPI440022	HA	United States	2013-Feb-18	B/Pennsylvania/02/2013	Pennsylvania Department of Health	Centers for Disease Control and Prevention
EPI440017	HA	United States	2013-Feb-05	B/Nevada/06/2013	Southern Nevada Public Health Lab	Centers for Disease Control and Prevention
EPI439299	HA	Romania	2013-Jan-16	B/Iasi/131732/2013	Cantacuzino Institute	Cantacuzino Institute	Necula, G.; Ivanciuc, A.; Ustea, L.; Straut, M.; Oprea, M.; Dinu, S.; Lupulescu, E.
EPI438972	HA	United States	2013-Feb-04	B/Massachusetts/01/2013	Massachusetts Department of Public Health	Centers for Disease Control and Prevention
EPI438969	HA	United States	2013-Feb-06	B/Iowa/03/2013	Iowa State Hygienic Laboratory	Centers for Disease Control and Prevention
EPI438963	HA	United States	2013-Jan-15	B/New Hampshire/02/2013	New Hampshire Public Health Laboratories	Centers for Disease Control and Prevention
EPI438946	HA	United States	2013-Feb-04	B/South Dakota/01/2013	South Dakota Public Health Lab	Centers for Disease Control and Prevention
EPI438776	HA	Malta	2013-Jan-15	B/Malta/MV14443/2013	Mater Dei Hospital	National Institute for Medical Research
EPI438737	HA	Belgium	2012-Dec-12	B/Belgium/G947/2012	Scientific Institute of Public Health	National Institute for Medical Research
EPI438641	HA	Sweden	2013-Jan-02	B/Stockholm/1/2013		Swedish Institute for Infectious Disease Control
EPI435653	HA	Spain	2012-Dec-17	B/Catalonia/5564S/2012	Hospital Clínic	Hospital Clínic de Barcelona	Mosquera, MM.; Isanta, R.; Marcos, MA.; Vila, J.
EPI433149	HA	United States	2013-Jan-14	B/Vermont/01/2013	Vermont Department of Health Laboratory	Centers for Disease Control and Prevention
EPI433146	HA	United States	2013-Jan-22	B/Oklahoma/02/2013	U.S. Air Force School of Aerospace Medicine	Centers for Disease Control and Prevention
EPI433124	HA	United States	2013-Jan-14	B/Arizona/01/2013	U.S. Air Force School of Aerospace Medicine	Centers for Disease Control and Prevention
EPI431493	HA	Japan	2013-Jan-17	B/NAGANO/2029/2013	Nagano Environmental Conservation Research Institute	National Institute of Infectious Diseases (NIID)	Fujisaki,Seiichiro; Kim,Namhee; Itoh,Reiko; Tashiro,Masato; Odagiri,Takato
EPI431384	HA	Spain	2012-Nov-07	B/PaisVasco/284/2012	Instituto de Salud Carlos III	National Institute for Medical Research
EPI431378	HA	Norway	2012-Nov-26	B/Norway/2349/2012	WHO National Influenza Centre	National Institute for Medical Research
EPI431374	HA	Norway	2012-Nov-01	B/Norway/2256/2012	WHO National Influenza Centre	National Institute for Medical Research
EPI431372	HA	Germany	2012-Dec-20	B/Nordrhein-Westfalen/5/2012	Robert-Koch-Institute	National Institute for Medical Research
EPI431338	HA	Hong Kong (SAR)	2013-Jan-07	B/Hong Kong/6/2013	Government Virus Unit	National Institute for Medical Research
EPI431332	HA	Hong Kong (SAR)	2013-Jan-19	B/Hong Kong/12/2013	Government Virus Unit	National Institute for Medical Research
EPI431326	HA	France	2012-Nov-16	B/Caen/1808/2012	Institut Pasteur	National Institute for Medical Research
EPI426467	HA	United States	2012-Dec-28	B/North Dakota/04/2012	North Dakota Department of Health	Centers for Disease Control and Prevention
EPI424235	HA	United States	2012-Dec-10	B/Texas/3072/2012		Other Database Import	Connors,B.C.; Jones,S.L.; Sanow,A.D.; Bisaha,S.A.; Canas,L.C.; Cosme,K.W.; Davis,M.G.; Yohannes,R.A.; Abshire,J.P.; DeMarcus,L.S.; LLoyd,L.V.; Seidel,A.K.; Smith,J.P.; Macintosh,V.H.; Fumia,K.F.; Macias,E.A.; Noe,J.C.; Sjoberg,P.A.; Zorich,S.C.
EPI424227	HA	United States	2012-Dec-05	B/Alabama/3064/2012		Other Database Import	Connors,B.C.; Jones,S.L.; Sanow,A.D.; Bisaha,S.A.; Canas,L.C.; Cosme,K.W.; Davis,M.G.; Yohannes,R.A.; Abshire,J.P.; DeMarcus,L.S.; LLoyd,L.V.; Seidel,A.K.; Smith,J.P.; Macintosh,V.H.; Fumia,K.F.; Macias,E.A.; Noe,J.C.; Sjoberg,P.A.; Zorich,S.C.
EPI422681	HA	United States	2013-Jan-15	B/Georgia/04/2013	Georgia Public Health Laboratory	Centers for Disease Control and Prevention
EPI419017	HA	Sweden	2012-Dec-20	B/Stockholm/19/2012		Swedish Institute for Infectious Disease Control
EPI418225	HA	Oman	2013-Jan-02	B/Oman/14/2013	Central Public Health Laboratory, Ministry of Health	Centers for Disease Control and Prevention
EPI417441	HA	Australia	2012-Sep-02	B/VICTORIA/325/2012	Disease Investigation Centre Wates (BBVW)	WHO Collaborating Centre for Reference and Research on Influenza	Deng,Y-M., Iannello,P.,Caldwell,N., Jelley,L.,Komadina,N.
EPI417417	HA	Australia	2012-Aug-23	B/SYDNEY/20/2012	Westmead Hospital	WHO Collaborating Centre for Reference and Research on Influenza	Deng,Y-M., Iannello,P.,Caldwell,N., Jelley,L.,Komadina,N.
EPI417412	HA	Sri Lanka	2006-Jan-01	B/SRI LANKA/4/2006	Medical Research Institute	WHO Collaborating Centre for Reference and Research on Influenza	Deng,Y-M., Iannello,P.,Caldwell,N., Jelley,L.,Komadina,N.
EPI417398	HA	Australia	2012-Oct-03	B/SOUTH AUSTRALIA/45/2012	Institute of Medical and Veterinary Science (IMVS)	WHO Collaborating Centre for Reference and Research on Influenza	Deng,Y-M., Iannello,P.,Caldwell,N., Jelley,L.,Komadina,N.
EPI416474	HA	Germany	2013-Jan-07	B/Thuringen/1/2013	Robert-Koch-Institute	National Institute for Medical Research
EPI416459	HA	France	2012-Dec-17	B/Lyon/2760/2012	CRR virus Influenza region Sud	National Institute for Medical Research
EPI416092	HA	United States	2012-Oct-20	B/South Dakota/07/2012	South Dakota Public Health Lab	Centers for Disease Control and Prevention
EPI408284	HA	United States	2012-Dec-08	B/Utah/13/2012	Utah Department of Health	Centers for Disease Control and Prevention
EPI408079	HA	Norway	2012-Nov-04	B/Norway/2157/2012	WHO National Influenza Centre	National Institute for Medical Research
EPI408049	HA	Denmark	2012-Nov-15	B/Denmark/24/2012	Statens Serum Institute	National Institute for Medical Research
EPI407069	HA	Argentina	2012-Jul-09	B/Buenos Aires/1002077/2012	Servicio de Virosis Respiratorias INEI ANLIS Carlos G. Malbran	Malbran
EPI406977	HA	Bangladesh	2012-Oct-14	B/Bangladesh/5025/2012	Institute of Epidemiology Disease Control and Research (IEDCR) & Bangladesh National Influenza Centre (NIC)	Centers for Disease Control and Prevention
EPI406303	HA	Norway	2012-Mar-16	B/Norway/1071/2012	WHO National Influenza Centre	National Institute for Medical Research
EPI406287	HA	United States	2012-Mar-13	B/Massachusetts/02/2012	Centers for Disease Control and Prevention	National Institute for Medical Research
EPI406283	HA	Zambia	2011-Jun-18	B/Lusaka/63/2011		National Institute for Medical Research
EPI406266	HA	South Africa	2012-Jun-22	B/Johannesburg/3559/2012	Sandringham, National Institute for Communicable D	National Institute for Medical Research
EPI406264	HA	South Africa	2012-Jun-22	B/Johannesburg/3559/2012	Sandringham, National Institute for Communicable D	National Institute for Medical Research
EPI406240	HA	Argentina	2012-Jan-01	B/Buenos Aires/R146/2012	Instituto Nacional de Enfermedades Infecciosas	National Institute for Medical Research
EPI405014	HA	United States	2012-Nov-03	B/New Mexico/03/2012	New Mexico Department of Health	Centers for Disease Control and Prevention
EPI401038	HA	Taiwan	2012-Jan-05	B/Taiwan/94712/2012		Other Database Import	Yang,J.R.; Huang,Y.P.; Chang,F.Y.; Hsu,L.C.; Lin,Y.C.; Huang,H.Y.; Wu,F.T.; Wu,H.S.; Liu,M.T.; Yang,J.-R.; Wu,H.-S.; Liu,M.-T.
EPI401036	HA	Taiwan	2012-Jan-13	B/Taiwan/94743/2012		Other Database Import	Yang,J.R.; Huang,Y.P.; Chang,F.Y.; Hsu,L.C.; Lin,Y.C.; Huang,H.Y.; Wu,F.T.; Wu,H.S.; Liu,M.T.; Yang,J.-R.; Wu,H.-S.; Liu,M.-T.
EPI401033	HA	Taiwan	2012-Jan-21	B/Taiwan/94775/2012		Other Database Import	Yang,J.R.; Huang,Y.P.; Chang,F.Y.; Hsu,L.C.; Lin,Y.C.; Huang,H.Y.; Wu,F.T.; Wu,H.S.; Liu,M.T.; Yang,J.-R.; Wu,H.-S.; Liu,M.-T.
EPI401032	HA	Taiwan	2011-Dec-31	B/Taiwan/94683/2011		Other Database Import	Yang,J.R.; Huang,Y.P.; Chang,F.Y.; Hsu,L.C.; Lin,Y.C.; Huang,H.Y.; Wu,F.T.; Wu,H.S.; Liu,M.T.; Yang,J.-R.; Wu,H.-S.; Liu,M.-T.
EPI401013	HA	Taiwan	2012-Feb-14	B/Taiwan/94786/2012		Other Database Import	Yang,J.R.; Huang,Y.P.; Chang,F.Y.; Hsu,L.C.; Lin,Y.C.; Huang,H.Y.; Wu,F.T.; Wu,H.S.; Liu,M.T.; Yang,J.-R.; Wu,H.-S.; Liu,M.-T.
EPI401009	HA	Taiwan	2008-Apr-07	B/Taiwan/2563/2008		Other Database Import	Yang,J.R.; Huang,Y.P.; Chang,F.Y.; Hsu,L.C.; Lin,Y.C.; Huang,H.Y.; Wu,F.T.; Wu,H.S.; Liu,M.T.; Yang,J.-R.; Wu,H.-S.; Liu,M.-T.
EPI399792	HA	Brazil	2011-Jun-13	B/Sao Paulo/11-14086/2011		Other Database Import	Santos,C.L.S.; Borborema,S.E.T.; Correa,K.O.; Silva,D.B.B.; Oliveira,M.I.; Paiva,T.M.
EPI399790	HA	Brazil	2011-May-20	B/Sao Paulo/11-12319/2011		Other Database Import	Santos,C.L.S.; Borborema,S.E.T.; Correa,K.O.; Silva,D.B.B.; Oliveira,M.I.; Paiva,T.M.
EPI399772	HA	Brazil	2010-Jul-14	B/Sao Paulo/60284/2010		Other Database Import	Santos,C.L.S.; Borborema,S.E.T.; Correa,K.O.; Silva,D.B.B.; Oliveira,M.I.; Paiva,T.M.
EPI399771	HA	Brazil	2010-May-24	B/Sao Paulo/11-10294/2010		Other Database Import	Santos,C.L.S.; Borborema,S.E.T.; Correa,K.O.; Silva,D.B.B.; Oliveira,M.I.; Paiva,T.M.
EPI399770	HA	Brazil	2010-May-12	B/Sao Paulo/11-9461/2010		Other Database Import	Santos,C.L.S.; Borborema,S.E.T.; Correa,K.O.; Silva,D.B.B.; Oliveira,M.I.; Paiva,T.M.
EPI399715	HA	United States	2011-Dec-17	B/Utah/06/2011		Other Database Import	Cox,N.; Shaw,M.; Barnes,J.; Garten,R.; Klimov,A.; Xu,X.
EPI399685	HA	United States	2012-Oct-20	B/Washington/14/2012	Washington State Public Health Laboratory	Centers for Disease Control and Prevention
EPI399662	HA	United States	2012-Oct-20	B/Maryland/07/2012	Maryland Department of Health and Mental Hygiene	Centers for Disease Control and Prevention
EPI398088	HA	United States	2012-Sep-25	B/Michigan/25/2012	Michigan Department of Community Health	Centers for Disease Control and Prevention
EPI398082	HA	United States	2012-Oct-13	B/Utah/08/2012	Utah Department of Health	Centers for Disease Control and Prevention
EPI398057	HA	United States	2012-Oct-07	B/Mississippi/02/2012	Mississippi Public Health Laboratory	Centers for Disease Control and Prevention
EPI397787	HA	United States	2012-Sep-07	B/Pennsylvania/06/2012	Pennsylvania Department of Health	Centers for Disease Control and Prevention
EPI397583	HA	Bangladesh	2012-Aug-12	B/Bangladesh/1005/2012	Institute of Epidemiology Disease Control and Research (IEDCR) & Bangladesh National Influenza Centre (NIC)	Centers for Disease Control and Prevention
EPI397493	HA	United States	2012-Sep-02	B/Florida/33/2012	Florida Department of Health-Jacksonville	Centers for Disease Control and Prevention
EPI397490	HA	United States	2012-Aug-30	B/Pennsylvania/05/2012	Pennsylvania Department of Health	Centers for Disease Control and Prevention
EPI397173	HA	United States	2012-Jul-25	B/Hawaii/10/2012	State of Hawaii Department of Health	Centers for Disease Control and Prevention
EPI395213	HA	Chile	2012-Jul-10	B/Santiago/49303/2012	Instituto de Salud Publica de Chile	Centers for Disease Control and Prevention
EPI395184	HA	Chile	2012-Jun-29	B/Santiago/47508/2012	Instituto de Salud Publica de Chile	Centers for Disease Control and Prevention
EPI394959	HA	Japan	2012-Feb-24	B/Taiwan/1219/2012	Center for Disease Control	National Institute of Infectious Diseases (NIID)	Fujisaki,Seiichiro; Kim,Namhee; Aya,Sato; Tashiro,Masato; Odagiri,Takato'
EPI394958	HA	Japan	2012-Apr-20	B/KANAGAWA/73/2012	Kanagawa Prefectural Institute of Public Health	National Institute of Infectious Diseases (NIID)	Fujisaki,Seiichiro; Kim,Namhee; Aya,Sato; Tashiro,Masato; Odagiri,Takato'
EPI394950	HA	Japan	2012-Mar-19	B/KYOTO/10/2012	Kyoto Prefectural Institute of Public Health and Environment	National Institute of Infectious Diseases (NIID)	Fujisaki,Seiichiro; Kim,Namhee; Aya,Sato; Tashiro,Masato; Odagiri,Takato'
EPI394718	HA	United States	2012-Jul-03	B/Hawaii/01/2012	State of Hawaii Department of Health	Centers for Disease Control and Prevention
EPI394712	HA	United States	2012-Aug-08	B/Hawaii/06/2012	State of Hawaii Department of Health	Centers for Disease Control and Prevention
EPI394419	HA	Australia	2012-Jun-06	B/PERTH/88/2012	Pathwest QE II Medical Centre	WHO Collaborating Centre for Reference and Research on Influenza	Deng,Y-M; Iannello,P; Caldwell,N; Jelley,L; Komadina,N
EPI394365	HA	Malaysia	2012-Jan-15	B/MALAYSIA/283/2012	Institut Penyelidikan Perubatan	WHO Collaborating Centre for Reference and Research on Influenza	Deng,Y-M; Iannello,P; Caldwell,N; Jelley,L; Komadina,N
EPI393637	HA	Korea, Republic of	2012-Apr-02	B/Gyeonggi/3008/2012	National Institute of Health	Centers for Disease Control and Prevention
EPI393612	HA	Hong Kong (SAR)	2012-Jun-11	B/Hong Kong/3576/2012	Government Virus Unit	Centers for Disease Control and Prevention
EPI393597	HA	United States	2012-Jul-17	B/Alaska/14/2012	Alaska State Virology Lab	Centers for Disease Control and Prevention
EPI393582	HA	China	2012-Jun-07	B/Jiangsu-Danyang/1138/2012	WHO Chinese National Influenza Center	Centers for Disease Control and Prevention
EPI393566	HA	Senegal	2012-Apr-14	B/Dakar/05/2012	Institut Pasteur de Dakar	National Institute for Medical Research
EPI393560	HA	Senegal	2012-Apr-12	B/Dakar/01/2012	Institut Pasteur de Dakar	National Institute for Medical Research
EPI393489	HA	Japan	2012-Jun-18	B/GUNMA/59/2012	Gunma Prefectural Institute of Public Health and Environmental Sciences	National Institute of Infectious Diseases (NIID)	Fujisaki,Seiichiro; Kim,Namhee; Aya,Sato; Tahiro,Masato; Odagiri,Takato'
EPI393485	HA	Japan	2012-Jun-05	B/KOBE/63/2012	Kobe Institute of Health	National Institute of Infectious Diseases (NIID)	Fujisaki,Seiichiro; Kim,Namhee; Aya,Sato; Tahiro,Masato; Odagiri,Takato'
EPI392610	HA	Madagascar	2012-Mar-28	B/Madagascar/02853/2012	Institut Pasteur de Madagascar	National Institute for Medical Research
EPI387445	HA	Finland	2012-May-14	B/Finland/292/2012	National Institute for Health and Welfare	National Institute for Medical Research
EPI386073	HA	Ethiopia	2012-May-02	B/Ethiopia/116/2012	Ethiopian Health and Nutrition Research Institute (EHNRI)	Centers for Disease Control and Prevention
EPI386054	HA	Ethiopia	2012-Apr-02	B/Ethiopia/65/2012	Ethiopian Health and Nutrition Research Institute (EHNRI)	Centers for Disease Control and Prevention
EPI382052	HA	Japan	2012-Apr-02	B/OSAKA/14/2012	Osaka Prefectural Institute of Public Health	National Institute of Infectious Diseases (NIID)	Fujisaki,Seiichiro; Kim,Namhee; Aya,Sato; Tashiro,Masato; Odagiri,Takato'
EPI382044	HA	Taiwan	2012-Feb-23	B/Taiwan/1088/2012	Center for Disease Control	National Institute of Infectious Diseases (NIID)	Fujisaki,Seiichiro; Kim,Namhee; Aya,Sato; Tashiro,Masato; Odagiri,Takato'
EPI382035	HA	Taiwan	2012-Jan-15	B/Taiwan/434/2012	Center for Disease Control	National Institute of Infectious Diseases (NIID)	Fujisaki,Seiichiro; Kim,Namhee; Aya,Sato; Tashiro,Masato; Odagiri,Takato'
EPI381521	HA	Nicaragua	2008-Jun-20	B/Managua/274.02/2008		Other Database Import	Wentworth,D.E.; Dugan,V.; Halpin,R.; Lin,X.; Bera,J.; Ghedin,E.; Hostetler,J.; Fedorova,N.; Overton,L.; Tsitrin,T.; Stockwell,T.; Katzel,D.; Li,K.; Amedeo,P.; Schobel,S.; Shrivastava,S.; Wang,S.; Thovarai,V.; Bishop,B.; Edworthy,P.; Kim,M.; Gordon,A.; Harris,E.; Balmaseda,A.; Saborio,S.; Guillermina,K.; Bao,Y.; Sanders,R.; Dernovoy,D.; Kiryutin,B.; Lipman,D.J.; Tatusova,T.
EPI380008	HA	Taiwan	2012-Feb-18	B/Taiwan/1116/2012	ADImmune Corporation	Centers for Disease Control and Prevention
EPI379571	HA	Australia	2012-Mar-02	B/PERTH/502/2012	Princess Margaret Hospital for Children	WHO Collaborating Centre for Reference and Research on Influenza	Deng,Y-M; Iannello,P; Caldwell,N; Jelley,L; Komadina,N
EPI379548	HA	Malaysia	2012-Feb-21	B/MALAYSIA/269/2012	Institut Penyelidikan Perubatan	WHO Collaborating Centre for Reference and Research on Influenza	Deng,Y-M; Iannello,P; Caldwell,N; Jelley,L; Komadina,N
EPI379519	HA	Thailand	2012-Mar-13	B/CHIANG RAI/50/2012	WHO National Influenza Centre, National Institute of Medical Research (NIMR)	WHO Collaborating Centre for Reference and Research on Influenza	Deng,Y-M; Iannello,P; Caldwell,N; Jelley,L; Komadina,N
EPI379427	HA	Australia	2012-May-02	B/TOWNSVILLE/5/2012	Queensland Health Scientific Services	WHO Collaborating Centre for Reference and Research on Influenza	Deng,Y-M; Iannello,P; Caldwell,N; Jelley,L; Komadina,N
EPI379376	HA	Australia	2012-Apr-29	B/DARWIN/19/2012	Royal Darwin Hospital	WHO Collaborating Centre for Reference and Research on Influenza	Deng,Y-M; Iannello,P; Caldwell,N; Jelley,L; Komadina,N
EPI378475	HA	Japan	2012-Apr-13	B/YAMAGATA/256/2012	Yamagata Prefectural Institute of Public Health	National Institute of Infectious Diseases (NIID)	Fujisaki,Seiichiro; Kim,Namhee; Aya,Sato; Tahiro,Masato; Odagiri,Takato'
EPI378246	HA	Lao, People's Democratic Republic	2012-Jan-09	B/Laos/I030/2012	Ministry of Health Laos	National Institute of Infectious Diseases (NIID)	Fujisaki,Seiichiro; Kim,Namhee; Aya,Sato; Tahiro,Masato; Odagiri,Takato'
EPI378157	HA	United States	2012-Jun-10	B/Utah/06/2012	Utah Department of Health	Centers for Disease Control and Prevention
EPI378129	HA	Bahrain	2012-Feb-01	B/Bahrain/15/2012	Ministry of Health Bahrain	Centers for Disease Control and Prevention
EPI378123	HA	United States	2012-May-24	B/Wisconsin/06/2012	Wisconsin State Laboratory of Hygiene	Centers for Disease Control and Prevention
EPI378117	HA	Bahrain	2012-Jan-30	B/Bahrain/10/2012	Ministry of Health Bahrain	Centers for Disease Control and Prevention
EPI377728	HA	Czech Republic	2012-Jan-01	B/Hradec Kralove/29/2012	National Institute of Public Health	National Institute for Medical Research
EPI377690	HA	Norway	2012-Feb-20	B/Norway/777/2012	WHO National Influenza Centre	National Institute for Medical Research
EPI377252	HA	Japan	2012-Feb-09	B/HIROSHIMA/6/2012	Center for Public Health and Environment, Hiroshima Prefectural Technology Research Institute	National Institute of Infectious Diseases (NIID)	Fujisaki,Seiichiro; Kim,Namhee; Aya,Sato; Tahiro,Masato; Odagiri,Takato'
EPI376976	HA	Macao	2012-Jan-13	B/MACAU/200075/2012	Laboratorio De Saude Publico	WHO Collaborating Centre for Reference and Research on Influenza	Deng,Y-M; Iannello,P; Caldwell,N; Komadina,N
EPI376898	HA	Australia	2012-Jan-23	B/BRISBANE/2/2012	Queensland Health Scientific Services	WHO Collaborating Centre for Reference and Research on Influenza	Deng,Y-M; Iannello,P; Caldwell,N; Komadina,N
EPI376344	HA	United States	2012-Mar-13	B/Massachusetts/02/2012	Massachusetts Department of Public Health	Centers for Disease Control and Prevention
EPI376330	HA	United States	2012-May-03	B/California/05/2012	California Department of Health Services	Centers for Disease Control and Prevention
EPI376327	HA	United States	2012-May-07	B/Rhode Island/03/2012	Rhode Island Department of Health	Centers for Disease Control and Prevention
EPI376309	HA	United States	2012-May-04	B/Wisconsin/05/2012	Wisconsin State Laboratory of Hygiene	Centers for Disease Control and Prevention
EPI374607	HA	Malaysia	2007-Nov-07	B/Malaysia/1887865/2007		Other Database Import	Wentworth,D.E.; Dugan,V.; Halpin,R.; Lin,X.; Bera,J.; Ghedin,E.; Fedorova,N.; Overton,L.; Tsitrin,T.; Stockwell,T.; Katzel,D.; Li,K.; Amedeo,P.; Schobel,S.; Shrivastava,S.; Wang,S.; Thovarai,V.; Bishop,B.; Edworthy,P.; Kim,M.; Chan,Y.F.; Sam,I.C.; AbuBakar,S.; Chang,L.Y.; Nor&apos;e,S.S.; Jafar,F.L.; Hassan,A.; Ahmad-Nasrah,S.N.; Bao,Y.; Sanders,R.; Dernovoy,D.; Kiryutin,B.; Lipman,D.J.; Tatusova…
EPI374487	HA	Malaysia	2006-Mar-23	B/Malaysia/34079/2006		Other Database Import	Wentworth,D.E.; Dugan,V.; Halpin,R.; Lin,X.; Bera,J.; Ghedin,E.; Fedorova,N.; Overton,L.; Tsitrin,T.; Stockwell,T.; Katzel,D.; Li,K.; Amedeo,P.; Schobel,S.; Shrivastava,S.; Wang,S.; Thovarai,V.; Bishop,B.; Edworthy,P.; Kim,M.; Chan,Y.F.; Sam,I.C.; AbuBakar,S.; Chang,L.Y.; Nor&apos;e,S.S.; Jafar,F.L.; Hassan,A.; Ahmad-Nasrah,S.N.; Bao,Y.; Sanders,R.; Dernovoy,D.; Kiryutin,B.; Lipman,D.J.; Tatusova…
EPI374463	HA	Malaysia	2006-Feb-08	B/Malaysia/33922/2006		Other Database Import	Wentworth,D.E.; Dugan,V.; Halpin,R.; Lin,X.; Bera,J.; Ghedin,E.; Fedorova,N.; Overton,L.; Tsitrin,T.; Stockwell,T.; Katzel,D.; Li,K.; Amedeo,P.; Schobel,S.; Shrivastava,S.; Wang,S.; Thovarai,V.; Bishop,B.; Edworthy,P.; Kim,M.; Chan,Y.F.; Sam,I.C.; AbuBakar,S.; Chang,L.Y.; Nor&apos;e,S.S.; Jafar,F.L.; Hassan,A.; Ahmad-Nasrah,S.N.; Bao,Y.; Sanders,R.; Dernovoy,D.; Kiryutin,B.; Lipman,D.J.; Tatusova…
EPI374295	HA	Malaysia	1997-Jan-25	B/Malaysia/11721/1997		Other Database Import	Wentworth,D.E.; Dugan,V.; Halpin,R.; Lin,X.; Bera,J.; Ghedin,E.; Fedorova,N.; Overton,L.; Tsitrin,T.; Stockwell,T.; Katzel,D.; Li,K.; Amedeo,P.; Schobel,S.; Shrivastava,S.; Wang,S.; Thovarai,V.; Bishop,B.; Edworthy,P.; Kim,M.; Chan,Y.F.; Sam,I.C.; AbuBakar,S.; Chang,L.Y.; Nor&apos;e,S.S.; Jafar,F.L.; Hassan,A.; Ahmad-Nasrah,S.N.; Bao,Y.; Sanders,R.; Dernovoy,D.; Kiryutin,B.; Lipman,D.J.; Tatusova…
EPI374279	HA	Malaysia	1997-Nov-10	B/Malaysia/13696/1997		Other Database Import	Wentworth,D.E.; Dugan,V.; Halpin,R.; Lin,X.; Bera,J.; Ghedin,E.; Fedorova,N.; Overton,L.; Tsitrin,T.; Stockwell,T.; Katzel,D.; Li,K.; Amedeo,P.; Schobel,S.; Shrivastava,S.; Wang,S.; Thovarai,V.; Bishop,B.; Edworthy,P.; Kim,M.; Chan,Y.F.; Sam,I.C.; AbuBakar,S.; Chang,L.Y.; Nor&apos;e,S.S.; Jafar,F.L.; Hassan,A.; Ahmad-Nasrah,S.N.; Bao,Y.; Sanders,R.; Dernovoy,D.; Kiryutin,B.; Lipman,D.J.; Tatusova…
EPI374223	HA	Malaysia	1996-Oct-05	B/Malaysia/10928/1996		Other Database Import	Wentworth,D.E.; Dugan,V.; Halpin,R.; Lin,X.; Bera,J.; Ghedin,E.; Fedorova,N.; Overton,L.; Tsitrin,T.; Stockwell,T.; Katzel,D.; Li,K.; Amedeo,P.; Schobel,S.; Shrivastava,S.; Wang,S.; Thovarai,V.; Bishop,B.; Edworthy,P.; Kim,M.; Chan,Y.F.; Sam,I.C.; AbuBakar,S.; Chang,L.Y.; Nor&apos;e,S.S.; Jafar,F.L.; Hassan,A.; Ahmad-Nasrah,S.N.; Bao,Y.; Sanders,R.; Dernovoy,D.; Kiryutin,B.; Lipman,D.J.; Tatusova…
EPI372563	HA	Sweden	2012-Apr-03	B/Stockholm/10/2012		Swedish Institute for Infectious Disease Control
EPI370717	HA	Japan	2012-Jan-25	B/OSAKA/1/2012	Osaka Prefectural Institute of Public Health	National Institute of Infectious Diseases (NIID)	Fujisaki,Seiichiro; Kim,Namhee; Aya,Sato; Tahiro,Masato; Odagiri,Takato'
EPI372234	HA	United States	2012-Apr-04	B/Rhode Island/01/2012	Rhode Island Department of Health	Centers for Disease Control and Prevention
EPI370117	HA	Singapore	2011-Oct-14	B/SINGAPORE/20/2011	National Public Health Laboratory	WHO Collaborating Centre for Reference and Research on Influenza	Deng,Y-M; Iannello,P; Caldwell,N; Komadina,N.
EPI370086	HA	Fiji	2011-Jun-02	B/FIJI/16/2011	National Centre for Scientific Services for Virology and Vector Borne Diseases	WHO Collaborating Centre for Reference and Research on Influenza	Deng,Y-M; Iannello,P; Caldwell,N; Komadina,N.
EPI370080	HA	Philippines	2011-Nov-23	B/PHILIPPINES/4290/2011	Research Institute of Tropical Medicine	WHO Collaborating Centre for Reference and Research on Influenza	Deng,Y-M; Iannello,P; Caldwell,N; Komadina,N.
EPI370063	HA	Sri Lanka	2011-Dec-01	B/SRI LANKA/15/2011	Medical Research Institute	WHO Collaborating Centre for Reference and Research on Influenza	Deng,Y-M; Iannello,P; Caldwell,N; Komadina,N.
EPI369142	HA	Sweden	2012-Feb-18	B/Stockholm/7/2012		Swedish Institute for Infectious Disease Control
EPI368945	HA	Greece	2012-Feb-01	B/Athens GR/123/2012	Hellenic Pasteur Institute	National Institute for Medical Research
EPI368627	HA	Japan	2012-Jan-17	B/SHIMANE/7/2012	Shimane Prefectural Institute of Public Health and Environmental Science	National Institute of Infectious Diseases (NIID)	Fujisaki,Seiichiro; Kim,Namhee; Aya,Sato; Tahiro,Masato; Odagiri,Takato'
EPI368410	HA	United States	2012-Feb-22	B/Alabama/01/2012	ADPH Bureau of Clinical Laboratories	Centers for Disease Control and Prevention
EPI368386	HA	United States	2012-Mar-06	B/Oregon/02/2012	Oregon Public Health Laboratory	Centers for Disease Control and Prevention
EPI366548	HA	Bangladesh	2007-Jan-01	B/Bangladesh/3333/2007		Other Database Import	Wentworth,D.E.; Dugan,V.; Halpin,R.; Lin,X.; Bera,J.; Ghedin,E.; Fedorova,N.; Overton,L.; Tsitrin,T.; Stockwell,T.; Amedeo,P.; Bishop,B.; Chen,H.; Edworthy,P.; Gupta,N.; Katzel,D.; Li,K.; Schobel,S.; Shrivastava,S.; Thovarai,V.; Wang,S.; Ramanunninair,M.; Silverman,J.; Devis,R.; Phan,L.; Le,J.; Pokorny,B.A.; Onodera,S.; Fulvini,A.A.; He,Y.; Kilbourne,E.D.; Bucher,D.; Bao,Y.; Sanders,R.; Dernovoy,…
EPI366233	HA	Kenya	2011-Mar-08	B/Kenya/525/2011	CDC-Kenya	Centers for Disease Control and Prevention
EPI363093	HA	Japan	2012-Jan-02	B/NIIGATA-C/1/2012	Niigata City Institute of Public Health and Environment	National Institute of Infectious Diseases (NIID)	Fujisaki,Seiichiro; Kim,Namhee; Aya,Sato; Tahiro,Masato; Odagiri,Takato'
EPI363091	HA	Korea, Republic of	2011-Nov-21	B/Gwangju/649/2011	National Institute of Health	National Institute of Infectious Diseases (NIID)	Fujisaki,Seiichiro; Kim,Namhee; Aya,Sato; Tahiro,Masato; Odagiri,Takato'
EPI362371	HA	Mongolia	2008-Mar-31	B/Ulaanbaatar/3695/2008		Other Database Import	Naranzul,T.; Enkhsaikhan,D.; Nymaa,G.; Nymadawa,P.
EPI358209	HA	United States	2012-Feb-09	B/Virginia/01/2012	Virginia Division of Consolidated Laboratories	Centers for Disease Control and Prevention
EPI358177	HA	United States	2012-Jan-25	B/Texas/02/2012	Texas Childrens Hospital	Centers for Disease Control and Prevention
EPI358162	HA	United States	2012-Feb-13	B/Minnesota/01/2012	Minnesota Department of Health	Centers for Disease Control and Prevention
EPI357766	HA	Latvia	2012-Jan-27	B/Latvia/1-48266/2012	State Agency, Infectology Center of Latvia	National Institute for Medical Research
EPI357740	HA	Qatar	2011-Jan-18	B/Qatar/2311001017/2011	Supreme Health Council	National Institute for Medical Research
EPI357722	HA	Senegal	2011-Sep-16	B/Dakar/08/2011	Institut Pasteur de Dakar	National Institute for Medical Research
EPI357718	HA	Spain	2011-Dec-27	B/LaRioja/RR8959/2011	Instituto de Salud Carlos III	National Institute for Medical Research
EPI357714	HA	United Kingdom	2012-Jan-05	B/England/9/2012	Health Protection Agency	National Institute for Medical Research
EPI357704	HA	Denmark	2011-Feb-26	B/Denmark/21/2011	Statens Serum Institute	National Institute for Medical Research
EPI357594	HA	Australia	2011-Nov-09	B/BRISBANE/124/2011	Queensland Health Scientific Services	WHO Collaborating Centre for Reference and Research on Influenza
EPI357554	HA	Australia	2011-Sep-22	B/TASMANIA/16/2011	Royal Hobart Hospital	WHO Collaborating Centre for Reference and Research on Influenza	Deng,Y-M; Iannello,P; Caldwell,N; Komadina,N.
EPI356982	HA	Japan	2012-Jan-30	B/YOKOHAMA/4/2012	Yokohama City Institute of Health	National Institute of Infectious Diseases (NIID)	Fujisaki,Seiichiro; Kim,Namhee; Aya,Sato; Tahiro,Masato; Odagiri,Takato'
EPI356975	HA	Japan	2012-Jan-16	B/NIIGATA/41/2012	Niigata Prefectural Institute of Public Health and Environmental Sciences	National Institute of Infectious Diseases (NIID)	Fujisaki,Seiichiro; Kim,Namhee; Aya,Sato; Tahiro,Masato; Odagiri,Takato'
EPI356963	HA	Japan	2011-Nov-12	B/TOKYO/98724/2011	Tokyo Metropolitan Institute of Public Health	National Institute of Infectious Diseases (NIID)	Fujisaki,Seiichiro; Kim,Namhee; Aya,Sato; Tahiro,Masato; Odagiri,Takato'
EPI356006	HA	United States	2012-Jan-09	B/New Hampshire/02/2012	New Hampshire Public Health Laboratories	Centers for Disease Control and Prevention
EPI353976	HA	China	2011-Nov-01	B/Hunan-Yuhua/1555/2011	WHO Chinese National Influenza Center	Centers for Disease Control and Prevention
EPI348464	HA	Korea, Republic of	2011-Nov-21	B/Gwangju/649/2011	National Institute of Health	Centers for Disease Control and Prevention
EPI348444	HA	United States	2011-Dec-16	B/Wisconsin/06/2011	Wisconsin State Laboratory of Hygiene	Centers for Disease Control and Prevention
EPI348417	HA	Japan	2011-Oct-04	B/IBARAKI/18/2011	Ibaraki Prefectural Institute of Public Health	National Institute of Infectious Diseases (NIID)	Fujisaki,Seiichiro; Kim,Namhee; Tahiro,Masato; Odagiri,Takato'
EPI347828	HA	China	2011-Sep-01	B/Jiangsu-Jurong/1505/2011	WHO Chinese National Influenza Center	WHO Chinese National Influenza Center	Yu Lan,Xiyan Li,Xiang Zhao,Yanhui Cheng,minju Tan,Yaoyao Chen,Bin Liu,Dayan Wang,Dexin Li,Yuelong Shu
EPI346990	HA	United States	2011-Oct-25	B/New Mexico/06/2011	New Mexico Department of Health	Centers for Disease Control and Prevention
EPI346981	HA	Bangladesh	2011-Sep-11	B/Bangladesh/5004/2011	Institute of Epidemiology Disease Control and Research (IEDCR) & Bangladesh National Influenza Centre (NIC)	Centers for Disease Control and Prevention
EPI346945	HA	Taiwan	2011-Jul-28	B/Taiwan/532/2011	Center for Disease Control	National Institute of Infectious Diseases (NIID)	Fujisaki,Seiichiro; Kim,Namhee; Sato,Aya; Tahiro,Masato; Odagiri,Takato'
EPI346799	HA	Madagascar	2011-Mar-25	B/Madagascar/1191/2011	Institut Pasteur de Madagascar	National Institute for Medical Research
EPI346768	HA	Iceland	2011-Feb-08	B/Iceland/33/2011	Landspitali - University Hospital	National Institute for Medical Research
EPI346144	HA	Australia	2011-Sep-22	B/VICTORIA/845/2011	Austin Health	WHO Collaborating Centre for Reference and Research on Influenza	Deng,Y-M.; Iannello,P.; Caldwell,N.; Leang,S-K; Komadina,N.
EPI346138	HA	Australia	2011-Jun-10	B/SOUTH AUSTRALIA/23/2011	Institute of Medical and Veterinary Science (IMVS)	WHO Collaborating Centre for Reference and Research on Influenza	Deng,Y-M.; Iannello,P.; Caldwell,N.; Leang,S-K; Komadina,N.
EPI346117	HA	Philippines	2011-Jul-27	B/PHILIPPINES/2519/2011	Research Institute of Tropical Medicine	WHO Collaborating Centre for Reference and Research on Influenza	Deng,Y-M.; Iannello,P.; Caldwell,N.; Leang,S-K; Komadina,N.
EPI346108	HA	Thailand	2011-Jul-19	B/NONTHABURI/1766/2011	WHO National Influenza Centre, National Institute of Medical Research (NIMR)	WHO Collaborating Centre for Reference and Research on Influenza	Deng,Y-M.; Iannello,P.; Caldwell,N.; Leang,S-K; Komadina,N.
EPI346084	HA	Australia	2011-Aug-16	B/VICTORIA/543/2011	Monash Medical Centre	WHO Collaborating Centre for Reference and Research on Influenza	Deng,Y-M.; Iannello,P.; Caldwell,N.; Leang,S-K; Komadina,N.
EPI346036	HA	Malaysia	2010-Jul-27	B/MALAYSIA/194/2010	Institut Penyelidikan Perubatan	WHO Collaborating Centre for Reference and Research on Influenza	Deng,Y-M.; Iannello,P.; Caldwell,N.; Leang,S-K; Komadina,N.
EPI346027	HA	New Zealand	2011-Jun-29	B/WELLINGTON/16/2011	Institute of Environmental Science and Research	WHO Collaborating Centre for Reference and Research on Influenza	Deng,Y-M.; Iannello,P.; Caldwell,N.; Leang,S-K; Komadina,N.
EPI345917	HA	Nicaragua	2010-Jul-15	B/Managua/2090.02/2010		Other Database Import	The NIAID Influenza Genome Sequencing Consortium
EPI345901	HA	Nicaragua	2010-Oct-11	B/Managua/4468.03/2010		Other Database Import	The NIAID Influenza Genome Sequencing Consortium
EPI345869	HA	Nicaragua	2010-Jul-04	B/Managua/5454.02/2010		Other Database Import	The NIAID Influenza Genome Sequencing Consortium
EPI341988	HA	United Kingdom	2010-Nov-11	B/England/110/2010	National Institute for Medical Research	Centers for Disease Control and Prevention
EPI340970	HA	Cambodia	2011-Jan-04	B/Cambodia/30/2011	WHO Collaborating Centre for Reference and Research on Influenza	Centers for Disease Control and Prevention
EPI340831	HA	Brazil	2011-May-27	B/Brazil/405/2011	Oswaldo Cruz Institute - FIOCRUZ - Laboratory of Respiratory Viruses and Measles (LVRS)	Centers for Disease Control and Prevention
EPI339123	HA	India	2007-Jul-27	B/Kol/1013/2007		Other Database Import	Roy,T.; Chawla-Sarkar,M.
EPI338250	HA	United States	2007-Feb-27	B/Tennessee/UR06-0458/2007		Other Database Import	The NIAID Influenza Genome Sequencing Consortium
EPI338220	HA	United States	2003-Jan-19	B/Hawaii/NHRC0001/2003		Other Database Import	The NIAID Influenza Genome Sequencing Consortium
EPI338215	HA	United States	2005-Mar-01	B/Missouri/NHRC0001/2005		Other Database Import	The NIAID Influenza Genome Sequencing Consortium
EPI338194	HA	Australia	2010-Oct-28	B/Brisbane/60-9/2010		Other Database Import	The NIAID Influenza Genome Sequencing Consortium
EPI338113	HA	United States	2006-Feb-21	B/California/NHRC0006/2006		Other Database Import	The NIAID Influenza Genome Sequencing Consortium
EPI334668	HA	France	2011-Apr-12	B/Lyon/CHU/15.216/2011	CRR virus Influenza region Sud	National Institute for Medical Research
EPI331691	HA	Australia	2011-Jan-01	B/DARWIN/26/2011	Royal Darwin Hospital	WHO Collaborating Centre for Reference and Research on Influenza	Deng,Y-M.; Iannello,P.; Caldwell,N.; Leang,S-K; Komadina,N.
EPI331688	HA	Australia	2010-Oct-11	B/SYDNEY/508/2010	Childrens Hospital Westmead	WHO Collaborating Centre for Reference and Research on Influenza	Deng,Y-M.; Iannello,P.; Caldwell,N.; Leang,S-K; Komadina,N.
EPI331379	HA	Cambodia	2011-Jan-03	B/CAMBODIA/7/2011	Institute Pasteur du Cambodia	WHO Collaborating Centre for Reference and Research on Influenza	Deng,Y-M.; Iannello,P.; Caldwell,N.; Leang,S-K; Komadina,N.
EPI331157	HA	Canada	2011-May-02	B/New Brunswick/1214/2011	National Microbiology Laboratory, Health Canada	Centers for Disease Control and Prevention
EPI331121	HA	China	2011-Jun-28	B/Hong Kong/781/2011	Government Virus Unit	Centers for Disease Control and Prevention
EPI331115	HA	Thailand	2011-May-20	B/Chanthaburi/73/2011	WHO National Influenza Centre, National Institute of Medical Research (NIMR)	Centers for Disease Control and Prevention
EPI330913	HA	China	2011-May-13	B/Shanghai-Pudongxin/1238/2011	WHO Chinese National Influenza Center	WHO Chinese National Influenza Center	Lan,Yu;Wang,Dayan;Li,Xiyan;Huang,Weijuan;Zhao,Xiang;Chen,Yaoyao;Yang,Lei;Shu,Yuelong
EPI330841	HA	China	2011-May-10	B/Anhui-Huashan/1216/2011	WHO Chinese National Influenza Center	WHO Chinese National Influenza Center	Lan,Yu;Wang,Dayan;Li,Xiyan;Huang,Weijuan;Zhao,Xiang;Chen,Yaoyao;Yang,Lei;Shu,Yuelong
EPI330737	HA	China	2011-May-11	B/Hunan-Lusong/1325/2011	WHO Chinese National Influenza Center	WHO Chinese National Influenza Center	Lan,Yu;Wang,Dayan;Li,Xiyan;Huang,Weijuan;Zhao,Xiang;Chen,Yaoyao;Yang,Lei;Shu,Yuelong
EPI330504	HA	China	2011-Mar-08	B/Shanghai-Songhui/1104/2011	WHO Chinese National Influenza Center	WHO Chinese National Influenza Center	Lan,Yu;Wang,Dayan;Li,Xiyan;Huang,Weijuan;Zhao,Xiang;Chen,Yaoyao;Yang,Lei;Shu,Yuelong
EPI330501	HA	China	2011-Feb-23	B/Shanghai-Songjiang/1100/2011	WHO Chinese National Influenza Center	WHO Chinese National Influenza Center	Lan,Yu;Wang,Dayan;Li,Xiyan;Huang,Weijuan;Zhao,Xiang;Chen,Yaoyao;Yang,Lei;Shu,Yuelong
EPI330092	HA	China	2011-Feb-09	B/Shanghai-Baoshan/152/2011	WHO Chinese National Influenza Center	WHO Chinese National Influenza Center	Lan,Yu;Wang,Dayan;Li,Xiyan;Huang,Weijuan;Zhao,Xiang;Chen,Yaoyao;Yang,Lei;Shu,Yuelong
EPI334423	HA	Ukraine	2011-Mar-02	B/Zaporizza/87/2011	Institute of Epidemiology and Infectious Diseases AMS of Ukraine	Centers for Disease Control and Prevention
EPI325289	HA	United States	2011-Mar-29	B/Tennessee/02/2011	Tennessee Department of Health Laboratory-Nashville	Centers for Disease Control and Prevention
EPI325270	HA	United States	2011-Feb-22	B/North Dakota/02/2011	North Dakota Department of Health	Centers for Disease Control and Prevention
EPI325191	HA	United States	2011-Apr-02	B/Nebraska/06/2011	Nebraska Public Health Lab	Centers for Disease Control and Prevention
EPI325094	HA	Finland	2010-Dec-30	B/Finland/39/2010	National Institute for Health and Welfare	Centers for Disease Control and Prevention
EPI325083	HA	United States	2011-Mar-30	B/Connecticut/03/2011	Connecticut Department. of Public Health	Centers for Disease Control and Prevention
EPI325061	HA	United States	2011-Apr-05	B/Alaska/08/2011	Alaska State Virology Lab	Centers for Disease Control and Prevention
EPI319562	HA	Sweden	2011-Mar-02	B/Stockholm/5/2011		Swedish Institute for Infectious Disease Control
EPI319421	HA	Cameroon	2010-Dec-01	A/Cameroon/10v-4600 GVFI/2010	Centre Pasteur du Cameroun	National Institute for Medical Research
EPI312951	HA	United States	2011-Jan-31	B/Vermont/02/2011	Vermont Department of Health Laboratory	Centers for Disease Control and Prevention
EPI312888	HA	United States	2011-Jan-31	B/North Carolina/15/2011	North Carolina State Laboratory of Public Health	Centers for Disease Control and Prevention
EPI312886	HA	United States	2011-Jan-29	B/North Carolina/14/2011	North Carolina State Laboratory of Public Health	Centers for Disease Control and Prevention
EPI312863	HA	United States	2010-Nov-22	B/North Carolina/03/2010	North Carolina State Laboratory of Public Health	Centers for Disease Control and Prevention
EPI312853	HA	United States	2011-Mar-01	B/Nevada/09/2011	Nevada State Health Laboratory	Centers for Disease Control and Prevention
EPI312847	HA	United States	2011-Feb-10	B/Nevada/07/2011	Nevada State Health Laboratory	Centers for Disease Control and Prevention
EPI312809	HA	United States	2011-Feb-09	B/Louisiana/09/2011	Louisiana Department of Health and Hospitals	Centers for Disease Control and Prevention
EPI312787	HA	China	2011-Jan-29	B/Hunan-Suxian/134/2011	WHO Chinese National Influenza Center	Centers for Disease Control and Prevention
EPI312784	HA	United States	2011-Feb-09	B/Florida/05/2011	Florida Department of Health-Jacksonville	Centers for Disease Control and Prevention
EPI312773	HA	Finland	2010-Dec-20	B/Finland/35/2010	National Institute for Health and Welfare	Centers for Disease Control and Prevention
EPI310240	HA	Denmark	2011-Jan-17	B/Denmark/11/2011		Other Database Import	Andresen,B.S.; Nielsen,L.P.
EPI309289	HA	United States	2010-Oct-29	B/Washington/02/2010	Washington State Public Health Laboratory	Centers for Disease Control and Prevention
EPI309257	HA	Oman	2010-Oct-26	B/Oman/3047/2010	Central Public Health Laboratory, Ministry of Health	Centers for Disease Control and Prevention
EPI309221	HA	Mexico	2010-Nov-22	B/Mexico/7443/2010	Laboratorio de Virus Respiratorio	Centers for Disease Control and Prevention
EPI309197	HA	Lao, People's Democratic Republic	2010-Oct-14	B/Laos/021/2010	National Center for Laboratory and Epidemiology	Centers for Disease Control and Prevention
EPI307173	HA	United States	2011-Feb-01	B/North Carolina/02/2011	North Carolina State Laboratory of Public Health	Centers for Disease Control and Prevention
EPI305413	HA	France	2010-Nov-29	B/Paris/1850/2010	Institut Pasteur	National Institute for Medical Research
EPI305407	HA	Portugal	2010-Dec-08	B/Lisboa/21/2010	Instituto Nacional de Saude	National Institute for Medical Research
EPI305375	HA	Germany	2010-Dec-28	B/Berlin/2/2010	Robert-Koch-Institute	National Institute for Medical Research
EPI302547	HA	Norway	2011-Jan-04	B/Norway/24/2011	WHO National Influenza Centre	Norwegian Institute of Public Health	Hungnes,O; Kilander,A
EPI302520	HA	Taiwan	2010-Sep-02	B/Taiwan/717/2010	ADImmune Corporation	Centers for Disease Control and Prevention
EPI302505	HA	United States	2010-Nov-06	B/Louisiana/01/2010	Louisiana Department of Health and Hospitals	Centers for Disease Control and Prevention
EPI302073	HA	Ukraine	2010-Dec-15	B/Zaporizzya/210/2010	Institute of Epidemiology and Infectious Diseases AMS of Ukraine	Centers for Disease Control and Prevention
EPI302070	HA	United States	2011-Jan-18	B/Wisconsin/01/2011	Wisconsin State Laboratory of Hygiene	Centers for Disease Control and Prevention
EPI302037	HA	United States	2010-Dec-20	B/Montana/01/2010	Montana Public Health Laboratory	Centers for Disease Control and Prevention
EPI301993	HA	United States	2010-Dec-14	B/Georgia/42/2010	Georgia Public Health Laboratory	Centers for Disease Control and Prevention
EPI301964	HA	United States	2010-Dec-01	B/California/08/2010	California Department of Health Services	Centers for Disease Control and Prevention
EPI301961	HA	United States	2011-Jan-04	B/California/02/2011	Naval Health Research Center	Centers for Disease Control and Prevention
EPI301326	HA	Iran, Islamic Republic of	2010-Nov-01	B/Tehran/5246/2010	Tehran University of Medical Sciences	National Institute for Medical Research
EPI301324	HA	Switzerland	2010-Oct-06	B/Switzerland/3822511/2010	Hopital Cantonal Universitaire de Geneves	National Institute for Medical Research
EPI301310	HA	France	2010-Oct-26	B/Marseille/889/2010	CRR virus Influenza region Sud	National Institute for Medical Research
EPI301300	HA	Portugal	2010-Dec-07	B/Lisboa/13/2010	Instituto Nacional de Saude	National Institute for Medical Research
EPI301298	HA	Ghana	2010-Dec-02	B/Ghana/FS/10-4716/2010	University of Ghana	National Institute for Medical Research
EPI301296	HA	Italy	2010-Dec-01	B/Genova/2/2010	Istituto Superiore di Sanità	National Institute for Medical Research
EPI301217	HA	United States	2010-Nov-21	B/Washington/01/2010	Washington State Public Health Laboratory	Centers for Disease Control and Prevention
EPI294836	HA	Puerto Rico	2010-Sep-16	B/Puerto Rico/01/2010	Puerto Rico Department of Health	Centers for Disease Control and Prevention
EPI294738	HA	United States	2010-Oct-18	B/Florida/02/2010	Florida Department of Health-Jacksonville	Centers for Disease Control and Prevention
EPI294256	HA	Papua New Guinea	2010-Aug-23	B/VANIMO/1/2010	Papua New Guinea Institute of Medical Research	WHO Collaborating Centre for Reference and Research on Influenza	Deng,Y-M; Iannello,P; Caldwell,N; Leang,S-K; Komadina,N.
EPI294073	HA	Micronesia, Federated States of	2010-Jul-18	B/YAP/2/2010	Yap State Hospital	WHO Collaborating Centre for Reference and Research on Influenza	Deng,Y-M; Iannello,P; Caldwell,N; Leang,S-K; Komadina,N.
EPI293728	HA	China	2010-Aug-27	B/Hubei-Wujiagang/1112/2010	WHO Chinese National Influenza Center	WHO Chinese National Influenza Center	Yu Lan,Xiyan Li,Xiang Zhao,Yanhui Cheng,minju Tan,Bin Liu,Yaoyao Chen,Lei Yang,Dayan Wang,Dexin Li,Yuelong Shu
EPI293720	HA	China	2010-Aug-19	B/Fujian-Meilie/1440/2010	WHO Chinese National Influenza Center	WHO Chinese National Influenza Center	Yu Lan,Xiyan Li,Xiang Zhao,Yanhui Cheng,minju Tan,Bin Liu,Yaoyao Chen,Lei Yang,Dayan Wang,Dexin Li,Yuelong Shu
EPI293640	HA	China	2010-Jul-09	B/Fujian-Licheng/118/2010	WHO Chinese National Influenza Center	WHO Chinese National Influenza Center	Yu Lan,Xiyan Li,Xiang Zhao,Yanhui Cheng,minju Tan,Bin Liu,Yaoyao Chen,Lei Yang,Dayan Wang,Dexin Li,Yuelong Shu
EPI291645	HA	United States	2010-Sep-02	B/Massachusetts/03/2010	Massachusetts Department of Public Health	Centers for Disease Control and Prevention
EPI302087	HA	India	2010-Sep-07	B/India/2019/2010	National Institute of Virology	Centers for Disease Control and Prevention
EPI291640	HA	Hong Kong (SAR)	2010-Sep-03	B/Hong Kong/2064/2010	Government Virus Unit	Centers for Disease Control and Prevention
EPI291623	HA	China	2010-Jul-10	B/Chongqing-Banan/1296/2010	WHO Chinese National Influenza Center	Centers for Disease Control and Prevention
EPI287070	HA	Spain	2010-Jun-21	B/Canarias/RR6754/2010	Instituto de Salud Carlos III	National Institute for Medical Research
EPI279203	HA	Cambodia	2010-Jul-13	B/CAMBODIA/5/2010	Institute Pasteur du Cambodia	WHO Collaborating Centre for Reference and Research on Influenza	Deng,Y-M; Iannello,P; Caldwell,N; Leang,S-K; Komadina,N
EPI278996	HA	Japan	2010-Apr-21	B/Yamaguchi/1/2010	National Institute of Infectious Diseases (NIID)	Centers for Disease Control and Prevention
EPI278938	HA	Dominican Republic	2010-Jun-25	B/Dominican Republic/4249/2010	Laboratorio de Investigacion / Centro de Educacion Medica y Amistad Dominico Japones (CEMADOJA)	Centers for Disease Control and Prevention
EPI279225	HA	Kenya	2010-May-03	B/Kenya/1/2010	Kenya Medical Research Institute (KEMRI)	WHO Collaborating Centre for Reference and Research on Influenza	Deng,Y-M; Iannello,P; Caldwell,N; Leang,S-Y; Komadina,N
EPI275337	HA	Guatemala	2010-Feb-17	B/Guatemala/61/2010	Laboratorio Nacional De Salud Guatemala	Centers for Disease Control and Prevention
EPI275315	HA	Bolivia, Plurinationial State of	2010-Mar-10	B/Bolivia/71/2010	Instituto Nacional de Laboratoriosde Salud (INLASA)	Centers for Disease Control and Prevention
EPI271921	HA	Russian Federation	2010-May-24	B/Moscow/18/2010	Russian Academy of Medical Sciences	National Institute for Medical Research
EPI271591	HA	Russian Federation	2010-Mar-19	B/Moscow/04/2010	Ivanovsky Research Institute of Virology RAMS	Centers for Disease Control and Prevention
EPI271588	HA	Russian Federation	2010-Mar-09	B/Moscow/02/2010	Ivanovsky Research Institute of Virology RAMS	Centers for Disease Control and Prevention
EPI271539	HA	Brazil	2010-Apr-22	B/Sao Paulo/22608/2010		Other Database Import	Oliveira,M.I.; Santos,C.L.S.; Ferreira,J.L.P.; Borborema,S.E.T.
EPI249550	HA	Bangladesh	2010-Feb-03	B/Bangladesh/9628/2010	Institute of Epidemiology Disease Control and Research (IEDCR) & Bangladesh National Influenza Centre (NIC)	Centers for Disease Control and Prevention
EPI247563	HA	Bangladesh	2010-Jan-20	B/Bangladesh/1994/2010	Institute of Epidemiology Disease Control and Research (IEDCR) & Bangladesh National Influenza Centre (NIC)	Centers for Disease Control and Prevention
EPI247516	HA	Bangladesh	2009-Nov-14	B/Bangladesh/4091/2009	Institute of Epidemiology Disease Control and Research (IEDCR) & Bangladesh National Influenza Centre (NIC)	Centers for Disease Control and Prevention
EPI247513	HA	Japan	2009-Nov-02	B/Japan/3280/2009	U.S. Air Force School of Aerospace Medicine	Centers for Disease Control and Prevention
EPI243627	HA	Hong Kong (SAR)	2009-Oct-11	B/Hong Kong/514/2009	Government Virus Unit	National Institute for Medical Research
EPI242844	HA	Russian Federation	1969-Jan-01	B/Russia/69		Other Database Import	Katinger,D.; Romanova,J.; Egorov,A.
EPI241214	HA	Bangladesh	2008-Aug-21	B/Bangladesh/3720/2008		Centers for Disease Control and Prevention
EPI241208	HA	China	2009-Dec-09	B/Shanghai-Fengxian/1255/2009	WHO Chinese National Influenza Center	Centers for Disease Control and Prevention
EPI233224	HA	Nigeria	2009-Nov-05	B/Nigeria/0958/2009	CDC GAP Nigeria	Centers for Disease Control and Prevention
EPI234508	HA	Kenya	2008-Jun-09	B/Nairobi/15/2008		Other Database Import	Symekher,S.M.L.; Magana,J.; Simwa,J.; Gachara,G.; Ochieng,W.; Komadina,N.
EPI215504	HA	Cambodia	2009-Jul-13	B/Cambodia/6877/2009	NAMRU-2, Cambodia	Centers for Disease Control and Prevention
EPI211755	HA	Cambodia	2009-Apr-02	B/CAMBODIA/3/2009	Institute Pasteur du Cambodia	WHO Collaborating Centre for Reference and Research on Influenza	Deng.Y; Iannello,P.; Ernest,J.; Caldwell,N.; Komadina,N.
EPI211387	HA	Haiti	2009-Jun-11	B/Haiti/40/2009	Laboratoire National de Sante Publique	Centers for Disease Control and Prevention
EPI193084	HA	Guatemala	2009-Jun-08	B/Guatemala/1317/2009	Laboratorio Nacional De Salud Guatemala	Centers for Disease Control and Prevention
EPI187633	HA	United States	2009-Mar-23	B/West Virginia/01/2009	West Virginia Office of Laboratory Services	Centers for Disease Control and Prevention
EPI187623	HA	United States	2009-Mar-04	B/Washington/02/2009	Washington State Public Health Laboratory	Centers for Disease Control and Prevention
EPI187619	HA	United States	2009-Mar-17	B/Virginia/03/2009	Virginia Division of Consolidated Laboratories	Centers for Disease Control and Prevention
EPI187600	HA	Russian Federation	2009-Mar-16	B/St. Petersburg/54/2009	Russian Academy of Medical Sciences	Centers for Disease Control and Prevention
EPI187581	HA	United States	2009-Apr-03	B/Nevada/02/2009	Nevada State Health Laboratory	Centers for Disease Control and Prevention
EPI187563	HA	United States	2009-Mar-12	B/Minnesota/02/2009	Minnesota Department of Health	Centers for Disease Control and Prevention
EPI187523	HA	China	2009-Mar-06	B/Hubei-Xiling/35/2009	WHO Chinese National Influenza Center	Centers for Disease Control and Prevention
EPI187507	HA	United States	2009-Mar-03	B/Florida/04/2009	Florida Department of Health-Jacksonville	Centers for Disease Control and Prevention
EPI179989	HA	Nicaragua	2008-Jun-02	B/Managua/4577.01/2008		Other Database Import
EPI179925	HA	Taiwan	2006-Nov-11	B/Taiwan/2755/2006		Other Database Import
EPI176439	HA	United States	2008-Sep-29	B/Washington/12/2008		Centers for Disease Control and Prevention
EPI176396	HA	United States	2009-Jan-16	B/New Jersey/01/2009	Hackensack University Medical Center	Centers for Disease Control and Prevention
EPI176375	HA	United States	2008-Dec-10	B/New Hampshire/02/2008		Centers for Disease Control and Prevention
EPI176373	HA	United States	2009-Jan-01	B/Texas/01/2009	Texas Childrens Hospital	Centers for Disease Control and Prevention
EPI175803	HA	Nicaragua	2008-Jun-04	B/Managua/3759.01/2008		Other Database Import
EPI174795	HA	Singapore	2008-Nov-18	B/Singapore/617/2008	Singapore General Hospital	WHO Collaborating Centre for Reference and Research on Influenza
EPI173881	HA	United States	2007-Mar-06	B/Texas/UR06-0541/2007		Other Database Import
EPI172561	HA	New Zealand	2008-Sep-08	B/Christchurch/133/2008		Centers for Disease Control and Prevention
EPI172559	HA	Kenya	2008-Jul-23	B/Kenya/1413/2008		Centers for Disease Control and Prevention
EPI172527	HA	Bangladesh	2008-Jun-15	B/Bangladesh/8023/2008		Centers for Disease Control and Prevention
EPI172498	HA	Mexico	2008-Oct-21	B/Mexico/4388/2008		Centers for Disease Control and Prevention
EPI172496	HA	Mexico	2008-Sep-09	B/Mexico/3821/2008		Centers for Disease Control and Prevention
EPI172334	HA	Thailand	2008-Aug-18	B/Thailand/723/2008	WHO National Influenza Centre, National Institute of Medical Research (NIMR)	WHO Collaborating Centre for Reference and Research on Influenza
EPI172189	HA	New Zealand	2008-Mar-27	B/Auckland/1/2008	Auckland Hospital	WHO Collaborating Centre for Reference and Research on Influenza
EPI172188	HA	Australia	2008-Jul-28	B/Brisbane/46/2008	Queensland Health Scientific Services	WHO Collaborating Centre for Reference and Research on Influenza
EPI171428	HA	United States	2008-Nov-24	B/Texas/27/2008		Centers for Disease Control and Prevention
EPI171425	HA	United States	2008-Nov-05	B/Michigan/11/2008		Centers for Disease Control and Prevention
EPI171417	HA	Kenya	2008-Jun-09	B/Kenya/1252/2008		Centers for Disease Control and Prevention
EPI171414	HA	India	2008-Aug-13	B/India/1491/2008		Centers for Disease Control and Prevention
EPI171407	HA	Bolivia, Plurinationial State of	2008-Nov-05	B/Bolivia/488/2008		Centers for Disease Control and Prevention
EPI168186	HA	United States	2008-Oct-06	B/Alaska/03/2008		Centers for Disease Control and Prevention
EPI168183	HA	Saint Lucia	2008-Aug-18	B/St. Lucia/8109/2008		Centers for Disease Control and Prevention
EPI168181	HA	Paraguay	2008-Jul-04	B/Paraguay/435/2008		Centers for Disease Control and Prevention
EPI168174	HA	United States	2008-Aug-27	B/Wisconsin/24/2008		Centers for Disease Control and Prevention
EPI168166	HA	Brazil	2008-Jul-28	B/Brazil/4659/2008		Centers for Disease Control and Prevention
EPI168156	HA	Uruguay	2008-Jun-09	B/Uruguay/06/2008		Centers for Disease Control and Prevention
EPI168154	HA	Uruguay	2008-Jun-01	B/Uruguay/02/2008		Centers for Disease Control and Prevention
EPI168146	HA	United States	2008-Mar-13	B/New Jersey/05/2008		Centers for Disease Control and Prevention
EPI172482	HA	China	2008-Feb-09	B/Hong Kong/125/2008		Centers for Disease Control and Prevention
EPI163183	HA	Guatemala	2008-Jun-05	B/Guatemala/558/2008		Centers for Disease Control and Prevention
EPI163156	HA	Singapore	2008-Apr-08	B/Singapore/07/2008		Centers for Disease Control and Prevention
EPI162965	HA	Australia	2008-Jan-01	B/Brisbane/9/2008	Queensland Health Scientific Services	WHO Collaborating Centre for Reference and Research on Influenza
EPI162947	HA	New Zealand	2008-Jun-27	B/Christchurch/1/2008	Institute of Environmental Science & Research	WHO Collaborating Centre for Reference and Research on Influenza
EPI161812	HA	Afghanistan	2008-Jan-10	B/Afghanistan/345/2008		Centers for Disease Control and Prevention
EPI161786	HA	China	2008-Mar-31	B/Hubei/Jiangan1105/2008		Centers for Disease Control and Prevention
EPI161724	HA	United States	2008-Mar-18	B/Florida/02/2008		Centers for Disease Control and Prevention
EPI160642	HA	United States	2008-Apr-11	B/New York/21/2008		Centers for Disease Control and Prevention
EPI160636	HA	United States	2008-Apr-26	B/Florida/09/2008		Centers for Disease Control and Prevention
EPI160572	HA	Thailand	2008-Mar-24	B/Thailand/425/2008	WHO National Influenza Centre, National Institute of Medical Research (NIMR)	WHO Collaborating Centre for Reference and Research on Influenza
EPI159930	HA	China	2003-Jan-01	B/Jilin/20/2003		Other Database Import
EPI157238	HA	Thailand	2007-Nov-23	B/Thailand/869/2007		Centers for Disease Control and Prevention
EPI157234	HA	Thailand	2007-Sep-21	B/Thailand/81/2007		Centers for Disease Control and Prevention
EPI157135	HA	Nepal	2007-Sep-30	B/Nepal/173/2007		Centers for Disease Control and Prevention
EPI157000	HA	Hong Kong (SAR)	2007-Dec-07	B/Hong Kong/1327/2007		Centers for Disease Control and Prevention
EPI156977	HA	French Guiana	2007-Feb-05	B/Guyane/06/2007		Centers for Disease Control and Prevention
EPI156863	HA	Australia	2008-Jun-05	B/Perth/14/2008	Pathwest QE II Medical Centre	WHO Collaborating Centre for Reference and Research on Influenza
EPI56106	HA	Taiwan	2001-May-25	B/Taiwan/1484/2001		Other Database Import
EPI55973	HA	Japan	2001-Jan-01	B/Shizuoka/15/2001		Other Database Import
EPI51023	HA	Japan	1999-Feb-02	B/Kouchi/193/99		Other Database Import
EPI156156	HA	United States	2008-Mar-19	B/Minnesota/02/2008		Centers for Disease Control and Prevention
EPI156146	HA	United States	2008-Jan-09	B/California/01/2008		Centers for Disease Control and Prevention
EPI156078	HA	Macao	2008-Jan-15	B/Macau/62/2008	Laboratorio De Saude Publico	WHO Collaborating Centre for Reference and Research on Influenza
EPI155719	HA	Thailand	2007-Mar-16	B/Thailand/416/2007		Centers for Disease Control and Prevention
EPI155717	HA	Thailand	2007-Mar-05	B/Thailand/400/2007		Centers for Disease Control and Prevention
EPI155510	HA	Russian Federation	2007-Feb-19	B/Moscow/14/2007		Centers for Disease Control and Prevention
EPI154277	HA	United States	2008-Mar-14	B/Illinois/01/2008		Centers for Disease Control and Prevention
EPI154275	HA	United States	2008-Feb-01	B/Texas/04/2008		Centers for Disease Control and Prevention
EPI154249	HA	United States	2008-Jan-01	B/Arkansas/01/2008		Centers for Disease Control and Prevention
EPI154207	HA	United States	2007-Nov-03	B/Hawaii/03/2007		Centers for Disease Control and Prevention
EPI153009	HA	Taiwan	2004-Feb-10	B/Taiwan/125/2004		Other Database Import
EPI137004	HA	United States	2007-Feb-15	B/Tennessee/UR06-0310/2007		Other Database Import
EPI134322	HA	United States	2007-May-01	B/Massachusetts/01/2007		Centers for Disease Control and Prevention
EPI133780	HA	United States	2007-Dec-10	B/Pennsylvania/13/2007		Centers for Disease Control and Prevention
EPI134302	HA	United States	2007-Oct-27	B/California/16/2007		Centers for Disease Control and Prevention
EPI134300	HA	United States	2007-Oct-29	B/California/19/2007		Centers for Disease Control and Prevention
EPI133720	HA	United States	2007-Nov-03	B/Pennsylvania/11/2007		Centers for Disease Control and Prevention
EPI105144	HA	United States	1986-Jan-01	B/Ann Arbor/1/1986		Other Database Import
EPI131052	HA	United States	1986-Jan-01	B/Ann Arbor/1/1986		Other Database Import
EPI129648	HA	United States	1986-Jan-01	B/Ann Arbor/1/1986		Other Database Import
EPI62238	HA	United States	2001-Jan-01	B/Temple/B1190/2001		Other Database Import
EPI56182	HA	United States	1988-Jan-01	B/Texas/37/1988		Other Database Import
EPI55876	HA	United States	2001-Jan-01	B/Temple/B1182/2001		Other Database Import
EPI51858	HA	Singapore	1991-Jul-10	B/Singapore/04/1991		Other Database Import
EPI50928	HA	Egypt	2004-Apr-27	B/Egypt/2040/2004		Other Database Import
EPI50776	HA	United States	2005-Jan-06	B/Houston/B787/2005		Other Database Import
EPI50339	HA	United States	2001-Jan-01	B/Temple/B1193/2001		Other Database Import
EPI50320	HA	United States	2001-Jan-01	B/Temple/B1181/2001		Other Database Import
EPI20748	HA	United States	1999-Jan-01	B/Memphis/8/99		Other Database Import
EPI20084	HA	Australia	2000-Aug-03	B/Victoria/504/2000		Other Database Import
EPI20135	HA	Australia	2000-Aug-03	B/Victoria/504/2000		Other Database Import
EPI20137	HA	Australia	2000-Aug-03	B/Victoria/504/2000		Other Database Import
EPI9034	HA	Switzerland	1997-Jan-01	B/Switzerland/4291/97		Other Database Import
EPI9036	HA	Switzerland	1997-Jan-01	B/Switzerland/4291/97		Other Database Import
EPI9010	HA	Austria	1999-Dec-02	B/Vienna/1/99		Other Database Import	Ferko,B.; Egorov,A.; Romanova,J.; Katinger,D.; Katinger,H.
EPI9012	HA	Austria	1999-Dec-02	B/Vienna/1/99		Other Database Import	Ferko,B.; Egorov,A.; Romanova,J.; Katinger,D.; Katinger,H.
EPI9014	HA	Austria	1999-Dec-02	B/Vienna/1/99		Other Database Import	Ferko,B.; Egorov,A.; Romanova,J.; Katinger,D.; Katinger,H.
EPI9016	HA	Austria	1999-Dec-02	B/Vienna/1/99		Other Database Import	Ferko,B.; Egorov,A.; Romanova,J.; Katinger,D.; Katinger,H.
EPI238679	HA	Austria	1999-Dec-02	B/Vienna/1/99		Other Database Import	Ferko,B.; Egorov,A.; Romanova,J.; Katinger,D.; Katinger,H.
EPI5577	HA	United States	1995-Jan-01	B/Memphis/18/95		Other Database Import
EPI4413	HA	United States	1992-Jan-01	B/Hawaii/1/92		Other Database Import
EPI5593	HA	United States	1992-Jan-01	B/Hawaii/1/92		Other Database Import
EPI614610	HA	United States	2014-Jan-01	B/Utah/09/2014 BX-55C	New York Medical College	Centers for Disease Control and Prevention
EPI438414	HA	United States	2012-Jan-01	B/Massachusetts/02/2012 BX-51B	New York Medical College	Centers for Disease Control and Prevention
EPI438412	HA	United States	2011-Jan-01	B/Nevada/03/2011 BX-47	New York Medical College	Centers for Disease Control and Prevention
EPI436299	HA	United States	2012-Jan-01	B/Massachusetts/02/2012 BX-51C	New York Medical College	Centers for Disease Control and Prevention
EPI366732	HA	United States	2012-Jan-01	B/reassortant/NYMC BX-42		Other Database Import	Wentworth,D.E.; Dugan,V.; Halpin,R.; Lin,X.; Bera,J.; Ghedin,E.; Fedorova,N.; Overton,L.; Tsitrin,T.; Stockwell,T.; Amedeo,P.; Bishop,B.; Chen,H.; Edworthy,P.; Gupta,N.; Katzel,D.; Li,K.; Schobel,S.; Shrivastava,S.; Thovarai,V.; Wang,S.; Ramanunninair,M.; Silverman,J.; Devis,R.; Phan,L.; Le,J.; Pokorny,B.A.; Onodera,S.; Fulvini,A.A.; He,Y.; Kilbourne,E.D.; Bucher,D.; Bao,Y.; Sanders,R.; Dernovoy,…
EPI366682	HA	United States	2012-Jan-01	B/reassortant/NYMC BX-41		Other Database Import	Wentworth,D.E.; Dugan,V.; Halpin,R.; Lin,X.; Bera,J.; Ghedin,E.; Fedorova,N.; Overton,L.; Tsitrin,T.; Stockwell,T.; Amedeo,P.; Bishop,B.; Chen,H.; Edworthy,P.; Gupta,N.; Katzel,D.; Li,K.; Schobel,S.; Shrivastava,S.; Thovarai,V.; Wang,S.; Ramanunninair,M.; Silverman,J.; Devis,R.; Phan,L.; Le,J.; Pokorny,B.A.; Onodera,S.; Fulvini,A.A.; He,Y.; Kilbourne,E.D.; Bucher,D.; Bao,Y.; Sanders,R.; Dernovoy,…
EPI366628	HA	United States	2012-Jan-01	B/reassortant/NYMC BX-33		Other Database Import	Wentworth,D.E.; Dugan,V.; Halpin,R.; Lin,X.; Bera,J.; Ghedin,E.; Fedorova,N.; Overton,L.; Tsitrin,T.; Stockwell,T.; Amedeo,P.; Bishop,B.; Chen,H.; Edworthy,P.; Gupta,N.; Katzel,D.; Li,K.; Schobel,S.; Shrivastava,S.; Thovarai,V.; Wang,S.; Ramanunninair,M.; Silverman,J.; Devis,R.; Phan,L.; Le,J.; Pokorny,B.A.; Onodera,S.; Fulvini,A.A.; He,Y.; Kilbourne,E.D.; Bucher,D.; Bao,Y.; Sanders,R.; Dernovoy,…
EPI366474	HA	United States	2012-Jan-01	B/reassortant/NYMC BX-39A		Other Database Import	Wentworth,D.E.; Dugan,V.; Halpin,R.; Lin,X.; Bera,J.; Ghedin,E.; Fedorova,N.; Overton,L.; Tsitrin,T.; Stockwell,T.; Amedeo,P.; Bishop,B.; Chen,H.; Edworthy,P.; Gupta,N.; Katzel,D.; Li,K.; Schobel,S.; Shrivastava,S.; Thovarai,V.; Wang,S.; Ramanunninair,M.; Silverman,J.; Devis,R.; Phan,L.; Le,J.; Pokorny,B.A.; Onodera,S.; Fulvini,A.A.; He,Y.; Kilbourne,E.D.; Bucher,D.; Bao,Y.; Sanders,R.; Dernovoy,…
EPI359500	HA	United States	2010-Jan-01	B/Finland/39/2010 BX-45A	New York Medical College	Centers for Disease Control and Prevention
EPI356777	HA	United States	2011-Jan-01	B/Nevada/03/2011 BX-47	New York Medical College	Centers for Disease Control and Prevention
EPI242836	HA	United States	2008-Jan-01	B/NYMC BX-7(Lee/1940-Jiangsu/10/2003)		Other Database Import	The NIAID Influenza Genome Sequencing Consortium
EPI630872	HA	United States	2015-May-20	B/Hawaii/11/2015	State of Hawaii Department of Health	Centers for Disease Control and Prevention
EPI630505	HA	Taiwan	2015-May-11	B/Taiwan/187/2015	Center for Disease Control	National Institute of Infectious Diseases (NIID)	Takashita,Emi; Fujisaki,Seiichiro; Shirakura,Masayuki; Watanabe,Shinji; Odagiri,Takato
EPI630503	HA	Taiwan	2015-Apr-13	B/Taiwan/118/2015	Center for Disease Control	National Institute of Infectious Diseases (NIID)	Takashita,Emi; Fujisaki,Seiichiro; Shirakura,Masayuki; Watanabe,Shinji; Odagiri,Takato
EPI630487	HA	Japan	2015-Mar-08	B/IWATE/1/2015	Research Institute for Environmental Sciences and Public Health of Iwate Prefecture	National Institute of Infectious Diseases (NIID)	Takashita,Emi; Fujisaki,Seiichiro; Shirakura,Masayuki; Watanabe,Shinji; Odagiri,Takato
EPI630053	HA	Australia	2015-Feb-21	B/South Australia/4/2015	Institute of Medical and Veterinary Science (IMVS)	WHO Collaborating Centre for Reference and Research on Influenza	Deng, Y-M.; Iannello, P.; Spirason, N.; Jelly, L.; Lau, H.; Komadina, N.
EPI630050	HA	Australia	2015-Feb-12	B/South Australia/3/2015	Institute of Medical and Veterinary Science (IMVS)	WHO Collaborating Centre for Reference and Research on Influenza	Deng, Y-M.; Iannello, P.; Spirason, N.; Jelly, L.; Lau, H.; Komadina, N.
EPI629361	HA	United States	2015-Jun-02	B/Alaska/25/2015	Alaska State Virology Lab	Centers for Disease Control and Prevention
EPI629051	HA	United States	2015-Apr-27	B/Indiana/25/2015	Indiana State Department of Health Laboratories	Centers for Disease Control and Prevention
EPI628910	HA	Japan	2015-May-03	B/AICHI/23/2015	Aichi Prefectural Institute of Public Health	National Institute of Infectious Diseases (NIID)	Takashita,Emi; Fujisaki,Seiichiro; Shirakura,Masayuki; Watanabe,Shinji; Odagiri,Takato
EPI628870	HA	Japan	2015-Apr-10	B/WAKAYAMA/70/2015	Wakayama Prefectural Research Center of Environment and Public Health	National Institute of Infectious Diseases (NIID)	Takashita,Emi; Fujisaki,Seiichiro; Shirakura,Masayuki; Watanabe,Shinji; Odagiri,Takato
EPI628856	HA	Japan	2015-Mar-10	B/KANAGAWA/5/2015	Kanagawa Prefectural Institute of Public Health	National Institute of Infectious Diseases (NIID)	Takashita,Emi; Fujisaki,Seiichiro; Shirakura,Masayuki; Watanabe,Shinji; Odagiri,Takato
EPI625880	HA	Ukraine	2015-Feb-04	B/Odessa/385/2015	Institute of Epidemiology and Infectious Diseases AMS of Ukraine	Centers for Disease Control and Prevention
EPI625746	HA	Ukraine	2015-Mar-07	B/Zaporizza/326/2015	Institute of Epidemiology and Infectious Diseases AMS of Ukraine	Centers for Disease Control and Prevention
EPI624862	HA	Ukraine	2015-Mar-03	B/Zaporizza/338/2015	Institute of Epidemiology and Infectious Diseases AMS of Ukraine	National Institute for Medical Research
EPI624850	HA	Slovakia	2015-Mar-31	B/Trencin/927/2015	National Public Health Institute of Slovakia	National Institute for Medical Research
EPI624808	HA	Moldova, Republic of	2015-Feb-11	B/Moldova/105.07/2015	National Centre for Preventive Medicine	National Institute for Medical Research
EPI624774	HA	Ghana	2015-Apr-01	B/Ghana/DILI-15-0295/2015	University of Ghana	National Institute for Medical Research
EPI622575	HA	France	2015-Apr-04	B/Bretagne/1668/2015	Institut Pasteur	Institut Pasteur
EPI622566	HA	France	2015-Apr-09	B/Pays de Loire/1692/2015	Institut Pasteur	Institut Pasteur
EPI622445	HA	China	2014-Sep-02	B/Anhui-Baohe/1680/2014	WHO Chinese National Influenza Center	WHO Chinese National Influenza Center	Yu Lan,Xiyan Li,Xiang Zhao,Yanhui Cheng,minju Tan,Weijuan Huang,Dayan Wang,Dexin Li,Yuelong Shu
EPI621921	HA	Ukraine	2015-Mar-05	B/Odessa/393/2015	Institute of Epidemiology and Infectious Diseases AMS of Ukraine	National Institute for Medical Research
EPI621541	HA	Japan	2015-Apr-14	B/KANAGAWA/14/2015	Kanagawa Prefectural Institute of Public Health	National Institute of Infectious Diseases (NIID)	Takashita,Emi; Fujisaki,Seiichiro; Shirakura,Masayuki; Watanabe,Shinji; Odagiri,Takato
EPI621507	HA	Lao, People's Democratic Republic	2014-Dec-11	B/Laos/I1242/2014	Ministry of Health Laos	National Institute of Infectious Diseases (NIID)	Takashita,Emi; Fujisaki,Seiichiro; Shirakura,Masayuki; Watanabe,Shinji; Odagiri,Takato
EPI621405	HA	Brazil	2015-May-13	B/Sao Paulo/10-19744/2015	Instituto Adolfo Lutz	Instituto Adolfo Lutz	Santos,Katia; Silva,Daniela; Benega,Margarete; Paulino,Renato; Santos,Cecilia; Paiva,Terezinha
EPI621182	HA	China	2015-Feb-05	B/Jiangsu/01/2015		Other Database Import	Guo,X.; Ge,Y.; Zhao,K.; Shi,Z.; Qi,X.; Cui,L.
EPI619054	HA	Japan	2015-Feb-16	B/MIE/3/2015	Mie Prefecture Health and Environment Research Institute	National Institute of Infectious Diseases (NIID)	Takashita,Emi; Fujisaki,Seiichiro; Shirakura,Masayuki; Watanabe,Shinji; Odagiri,Takato
EPI611242	HA	United States	2015-Mar-19	B/Florida/28/2015	Florida Department of Health-Tampa	Centers for Disease Control and Prevention
EPI611234	HA	United States	2015-Mar-09	B/Illinois/13/2015	Illinois Department of Public Health-Chicago	Centers for Disease Control and Prevention
EPI608962	HA	Japan	2015-Mar-16	B/YAMAGUCHI/4/2015	Yamaguchi Prefectural Institute of Public Health and Environment	National Institute of Infectious Diseases (NIID)	Takashita,Emi; Fujisaki,Seiichiro; Shirakura,Masayuki; Watanabe,Shinji; Odagiri,Takato
EPI603460	HA	United States	2015-Apr-12	B/Wisconsin/23/2015	Wisconsin State Laboratory of Hygiene	Centers for Disease Control and Prevention
EPI603421	HA	United States	2015-Apr-15	B/New Hampshire/05/2015	New Hampshire Public Health Laboratories	Centers for Disease Control and Prevention
EPI603334	HA	United States	2015-Apr-03	B/Maine/05/2015	Maine Health and Environmental Testing Laboratory	Centers for Disease Control and Prevention
EPI603310	HA	United States	2015-Mar-25	B/Washington/14/2015	Marshfield Clinic Research Foundation	Centers for Disease Control and Prevention
EPI603142	HA	United States	2015-Mar-05	B/Washington/11/2015	Marshfield Clinic Research Foundation	Centers for Disease Control and Prevention
EPI603134	HA	United States	2015-Mar-19	B/Wisconsin/20/2015	Marshfield Clinic Research Foundation	Centers for Disease Control and Prevention
EPI603011	HA	United States	2015-Mar-20	B/Iowa/12/2015	Iowa State Hygienic Laboratory	Centers for Disease Control and Prevention
EPI601565	HA	Romania	2015-Mar-09	B/Galati/179025/2015	Cantacuzino Institute	Cantacuzino Institute
EPI598797	HA	Finland	2014-Dec-10	B/Finland/470/2014	National Institute for Health and Welfare	National Institute for Health and Welfare	Ikonen, Niina; Haveri, Anu; Haanpää, Minna
EPI598383	HA	Italy	2015-Feb-23	B/Perugia/22/2015	Istituto Superiore di Sanità	National Institute for Medical Research
EPI598381	HA	Italy	2015-Feb-03	B/Parma/4/2015	Istituto Superiore di Sanità	National Institute for Medical Research
EPI592889	HA	United States	2015-Apr-03	B/Wyoming/20/2015	Wyoming Public Health Laboratory	Centers for Disease Control and Prevention
EPI592815	HA	United States	2015-Apr-08	B/New York/18/2015	New York State Department of Health	Centers for Disease Control and Prevention
EPI591032	HA	Romania	2015-Feb-04	B/Gorj/177092/2015		Cantacuzino Institute
EPI590958	HA	Pakistan	2014-Mar-22	B/Pakistan/44/2014	National Institute of Health	Centers for Disease Control and Prevention
EPI590919	HA	Brazil	2015-Apr-06	B/Sao Paulo/3-23079/2015	Instituto Adolfo Lutz	Instituto Adolfo Lutz	Santos,Katia;Silva,Daniela;Benega,Margarete;Paulino,Renato;Santos,Cecilia;Paiva,Terezinha
EPI589466	HA	Jordan	2015-Feb-24	B/Jordan/30059/2015	Laboratory Directorate	National Institute for Medical Research
EPI589321	HA	Japan	2015-Feb-24	B/SAITAMA/7/2015	Saitama Institute of Public Health	National Institute of Infectious Diseases (NIID)	Takashita,Emi; Fujisaki,Seiichiro; Shirakura,Masayuki; Watanabe,Shinji; Odagiri,Takato
EPI587399	HA	United States	2015-Mar-03	B/North Carolina/05/2015	North Carolina State Laboratory of Public Health	Centers for Disease Control and Prevention
EPI587339	HA	United States	2015-Mar-04	B/Ohio/05/2015	Ohio Department of Health Laboratories	Centers for Disease Control and Prevention
EPI587228	HA	United States	2015-Mar-03	B/Massachusetts/02/2015	Massachusetts Department of Public Health	Centers for Disease Control and Prevention
EPI587106	HA	United States	2015-Feb-04	B/Iowa/02/2015	Iowa State Hygienic Laboratory	Centers for Disease Control and Prevention
EPI587090	HA	United States	2015-Feb-04	B/Pennsylvania/03/2015	UPMC-CLB Dept of Microbiology	Centers for Disease Control and Prevention
EPI586924	HA	United States	2015-Jan-01	B/Georgia/04/2015	Georgia Public Health Laboratory	Centers for Disease Control and Prevention
EPI586817	HA	United States	2015-Feb-15	B/Wisconsin/05/2015	Marshfield Clinic Research Foundation	Centers for Disease Control and Prevention
EPI586801	HA	United States	2015-Feb-12	B/Texas/05/2015	Texas Department of State Health Services-Laboratory Services	Centers for Disease Control and Prevention
EPI586724	HA	United States	2015-Mar-04	B/California/08/2015	California Department of Health Services	Centers for Disease Control and Prevention
EPI586477	HA	Brazil	2015-Mar-24	B/Goias/32283/2015	Instituto Adolfo Lutz	Instituto Adolfo Lutz	Santos,Katia;Silva,Daniela;Benega,Margarete;Paulino,Renato;Santos,Cecilia;Paiva,Terezinha
EPI586474	HA	Brazil	2015-Mar-23	B/Tocantins/29515/2015	Instituto Adolfo Lutz	Instituto Adolfo Lutz	Santos,Katia;Silva,Daniela;Benega,Margarete;Paulino,Renato;Santos,Cecilia;Paiva,Terezinha
EPI586461	HA	China	2015-Feb-03	B/Shanghai-Songjiang/1100/2015	WHO Chinese National Influenza Center	WHO Chinese National Influenza Center	Xiaoxu Zeng,Xiyan Li,Xiang Zhao,Yanhui Cheng,minju Tan,Weijuan Huang,Dayan Wang,Dexin Li,Yuelong Shu
EPI586428	HA	China	2015-Feb-03	B/Hebei-Changan/1102/2015	WHO Chinese National Influenza Center	WHO Chinese National Influenza Center	Xiaoxu Zeng,Xiyan Li,Xiang Zhao,Yanhui Cheng,minju Tan,Weijuan Huang,Dayan Wang,Dexin Li,Yuelong Shu
EPI586398	HA	China	2015-Feb-02	B/Anhui-Jinan/184/2015	WHO Chinese National Influenza Center	WHO Chinese National Influenza Center	Xiaoxu Zeng,Xiyan Li,Xiang Zhao,Yanhui Cheng,minju Tan,Weijuan Huang,Dayan Wang,Dexin Li,Yuelong Shu
EPI586386	HA	China	2014-Dec-29	B/HK/5/2015	WHO Chinese National Influenza Center	WHO Chinese National Influenza Center	Xiaoxu Zeng,Xiyan Li,Xiang Zhao,Yanhui Cheng,minju Tan,Weijuan Huang,Dayan Wang,Dexin Li,Yuelong Shu
EPI585060	HA	Japan	2015-Jan-30	B/FUKUOKA-C/1/2015	Fukuoka City Institute for Hygiene and the Environment	National Institute of Infectious Diseases (NIID)	Takashita,Emi; Fujisaki,Seiichiro; Shirakura,Masayuki; Watanabe,Shinji; Odagiri,Takato
EPI585048	HA	Japan	2015-Jan-26	B/KOCHI/103/2015	Kochi Public Health and Sanitation Institute	National Institute of Infectious Diseases (NIID)	Takashita,Emi; Fujisaki,Seiichiro; Shirakura,Masayuki; Watanabe,Shinji; Odagiri,Takato
EPI582852	HA	United States	2015-Mar-04	B/Massachusetts/01/2015	Massachusetts Department of Public Health	Centers for Disease Control and Prevention
EPI582845	HA	United States	2015-Feb-23	B/Minnesota/01/2015	Minnesota Department of Health	Centers for Disease Control and Prevention
EPI582713	HA	United States	2015-Mar-16	B/Utah/12/2015	Utah Department of Health	Centers for Disease Control and Prevention
EPI582685	HA	United States	2015-Feb-09	B/Alaska/04/2015	Alaska State Virology Lab	Centers for Disease Control and Prevention
EPI620355	HA	Cambodia	2014-Nov-13	B/Cambodia/1253/2014	National Public Health Laboratory	Centers for Disease Control and Prevention
EPI581010	HA	Japan	2014-Jan-29	B/Nagasaki/13N035/2014		Other Database Import	Hibino,A.; Saito,R.; Shoubugawa,Y.; Kondo,H.; Saito,T.; Takemae,N.; Makiya,T.; Masaki,H.; Aso,N.; Kita,Y.; Kuroki,R.; Shirahige,Y.
EPI589029	HA	India	2011-Sep-02	B/Delhi/V07/2011		Other Database Import	Kumar,S.; Khare,S.; Saidullah,B.; Rai,A.
EPI574854	HA	Zambia	2014-Sep-22	B/Zambia/04-241/2014	University Teaching Hospital	National Institute for Medical Research
EPI574808	HA	Portugal	2014-Dec-18	B/Lisboa/29/2014	Instituto Nacional de Saude	National Institute for Medical Research
EPI574806	HA	Portugal	2014-Dec-31	B/Lisboa/26/2014	Instituto Nacional de Saude	National Institute for Medical Research
EPI574798	HA	Portugal	2015-Jan-12	B/Lisboa/21/2015	Instituto Nacional de Saude	National Institute for Medical Research
EPI574770	HA	Ghana	2015-Jan-06	B/Ghana/DILI-15-0011/2015	University of Ghana	National Institute for Medical Research
EPI574732	HA	Cameroon	2014-Jul-11	B/Cameroon/14V-5323 GVFI/2014	Centre Pasteur du Cameroun	National Institute for Medical Research
EPI573626	HA	Brazil	2015-Jan-20	B/Goias/6393/2015	Instituto Adolfo Lutz	Instituto Adolfo Lutz	Santos,Katia;Silva,Daniela;Benega,Margarete;Paulino,Renato;Santos,Cecilia;Paiva,Terezinha
EPI570061	HA	Sweden	2015-Feb-11	B/Stockholm/3/2015		Swedish Institute for Infectious Disease Control
EPI569994	HA	Sweden	2015-Feb-03	B/Trollhattan/3/2015		Swedish Institute for Infectious Disease Control
EPI569785	HA	Lao, People's Democratic Republic	2014-Nov-27	B/Laos/O570/2014	Ministry of Health Laos	National Institute of Infectious Diseases (NIID)	Takashita,Emi; Fujisaki,Seiichiro; Shirakura,Masayuki; Watanabe,Shinji; Odagiri,Takato
EPI569783	HA	Lao, People's Democratic Republic	2014-Nov-27	B/Laos/O566/2014	Ministry of Health Laos	National Institute of Infectious Diseases (NIID)	Takashita,Emi; Fujisaki,Seiichiro; Shirakura,Masayuki; Watanabe,Shinji; Odagiri,Takato
EPI569769	HA	Nepal	2014-Apr-06	B/Nepal/561A/2014	National Public Health Laboratory	National Institute of Infectious Diseases (NIID)	Takashita,Emi; Fujisaki,Seiichiro; Shirakura,Masayuki; Watanabe,Shinji; Odagiri,Takato
EPI569188	HA	United States	2015-Jan-19	B/Vermont/01/2015	Vermont Department of Health Laboratory	Centers for Disease Control and Prevention
EPI569135	HA	Chile	2014-Nov-20	B/Santiago/75720/2014	Instituto de Salud Publica de Chile	Centers for Disease Control and Prevention
EPI569090	HA	Paraguay	2014-Nov-08	B/Paraguay/9900/2014	Central Laboratory of Public Health	Centers for Disease Control and Prevention
EPI569052	HA	United States	2015-Feb-02	B/North Carolina/01/2015	North Carolina State Laboratory of Public Health	Centers for Disease Control and Prevention
EPI569045	HA	United States	2015-Jan-07	B/New Mexico/01/2015	New Mexico Department of Health	Centers for Disease Control and Prevention
EPI568976	HA	Mexico	2014-Nov-09	B/Mexico/2573/2014	Laboratorio de Virus Respiratorio	Centers for Disease Control and Prevention
EPI568882	HA	United States	2014-Dec-16	B/Florida/60/2014	Florida Department of Health-Jacksonville	Centers for Disease Control and Prevention
EPI568869	HA	United States	2014-Nov-13	B/California/31/2014	California Department of Health Services	Centers for Disease Control and Prevention
EPI568861	HA	Bahrain	2014-Dec-03	B/Bahrain/626/2014	Ministry of Health Bahrain	Centers for Disease Control and Prevention
EPI568823	HA	United States	2014-Dec-29	B/Alabama/06/2014	ADPH Bureau of Clinical Laboratories	Centers for Disease Control and Prevention
EPI566857	HA	Japan	2015-Jan-09	B/SAPPORO/1/2015	Sapporo City Institute of Public Health	National Institute of Infectious Diseases (NIID)	Takashita,Emi; Fujisaki,Seiichiro; Shirakura,Masayuki; Watanabe,Shinji; Odagiri,Takato
EPI566821	HA	Vietnam	2013-Nov-06	B/Vietnam/13V B-9/2013		Niigata University	Saito, Reiko; Takemae, Nobuhiro; Saito, Takehiko; Shobugawa, Yugo; Kondo, Hiroki; Hibino, Akinobu
EPI566783	HA	Vietnam	2013-Mar-01	B/Vietnam/13V B-3/2013		Niigata University	Saito, Reiko; Takemae, Nobuhiro; Saito, Takehiko; Shobugawa, Yugo; Kondo, Hiroki; Hibino, Akinobu
EPI566526	HA	Australia	2012-Nov-27	B/South Australia/90/2012	Institute of Medical and Veterinary Science (IMVS)	WHO Collaborating Centre for Reference and Research on Influenza	Deng,Y-M.; Iannello,P.; Erenest,J.; Spirason, N.; Komadina,N.
EPI566237	HA	Australia	2012-Nov-30	B/South Australia/73/2012	Institute of Medical and Veterinary Science (IMVS)	WHO Collaborating Centre for Reference and Research on Influenza	Deng,Y-M.; Iannello,P.; Erenest,J.; Spirason, N.; Komadina,N.
EPI565243	HA	Hong Kong (SAR)	2014-Nov-16	B/Hong Kong/3785/2014	Government Virus Unit	Centers for Disease Control and Prevention
EPI565220	HA	United States	2014-Dec-18	B/Texas/41/2014	Baylor College of Medicine	Centers for Disease Control and Prevention
EPI565132	HA	United States	2014-Dec-08	B/Maryland/18/2014	Maryland Department of Health and Mental Hygiene	Centers for Disease Control and Prevention
EPI562799	HA	Brazil	2015-Jan-05	B/Goias/3013/2015	Instituto Adolfo Lutz	Instituto Adolfo Lutz	Santos,Katia;Silva,Daniela;Benega,Margarete;Paulino,Renato;Santos,Cecilia;Paiva,Terezinha
EPI562698	HA	Hong Kong (SAR)	2014-Nov-27	B/Hong Kong/3789/2014	Government Virus Unit	Centers for Disease Control and Prevention
EPI562694	HA	United States	2014-Dec-24	B/Ohio/06/2014	Ohio Department of Health Laboratories	Centers for Disease Control and Prevention
EPI562343	HA	Jordan	2014-Dec-17	B/Jordan/20555/2014	Laboratory Directorate	National Institute for Medical Research
EPI562341	HA	Ghana	2014-Nov-10	B/Ghana/DILI-14-1032/2014	University of Ghana	National Institute for Medical Research
EPI562339	HA	Ghana	2014-Nov-04	B/Ghana/DILI-14-0878/2014	University of Ghana	National Institute for Medical Research
EPI562322	HA	Algeria	2014-Oct-12	B/Algiers/09/2014	Institut Pasteur d'Algerie	National Institute for Medical Research
EPI562209	HA	China	2015-Jan-05	B/Beijing-Chaoyang/113/2015	WHO Chinese National Influenza Center	WHO Chinese National Influenza Center	Xiaoxu Zeng,Xiyan Li,Xiang Zhao,Yanhui Cheng,minju Tan,Weijuan Huang,Dayan Wang,Dexin Li,Yuelong Shu
EPI562030	HA	Australia	2014-Dec-03	B/Perth/579/2014	Pathwest QE II Medical Centre	WHO Collaborating Centre for Reference and Research on Influenza	Deng,Y-M.; Iannello,P.; Spirason,N; Jelley,L.;Lau,H.; Komadina,N.
EPI558942	HA	Sweden	2014-Dec-11	B/Stockholm/7/2014		Swedish Institute for Infectious Disease Control
EPI557960	HA	Ukraine	2015-Jan-03	B/Ukraine/1/2015	Institute of Epidemiology and Infectious Diseases AMS of Ukraine	National Institute for Medical Research
EPI557926	HA	Ukraine	2014-Dec-16	B/Khmelnitsky/14/2014	Institute of Epidemiology and Infectious Diseases AMS of Ukraine	National Institute for Medical Research
EPI556420	HA	United States	2014-Dec-01	B/Massachusetts/06/2014	Massachusetts Department of Public Health	Centers for Disease Control and Prevention
EPI556400	HA	Chile	2014-Nov-03	B/Coyhaique/71008/2014	Instituto de Salud Publica de Chile	Centers for Disease Control and Prevention
EPI556398	HA	United States	2014-Dec-12	B/Montana/06/2014	Montana Laboratory Services Bureau	Centers for Disease Control and Prevention
EPI556396	HA	United States	2014-Dec-03	B/Washington/12/2014	Marshfield Clinic Research Foundation	Centers for Disease Control and Prevention
EPI556384	HA	United States	2014-Nov-11	B/California/30/2014	California Department of Health Services	Centers for Disease Control and Prevention
EPI555219	HA	Germany	2014-Dec-16	B/Rheinland-Pfalz/1/2014	Robert-Koch-Institute	National Institute for Medical Research
EPI555205	HA	Spain	2014-Dec-05	B/Madrid/SO12928/2014	Instituto de Salud Carlos III	National Institute for Medical Research
EPI554829	HA	China	2005-Apr-19	B/Jiangxi/568/2004	WHO Chinese National Influenza Center	WHO Chinese National Influenza Center	Xiaoxu Zeng,Xiyan Li,Xiang Zhao,Yanhui Cheng,minju Tan,Weijuan Huang,Dayan Wang,Dexin Li,Yuelong Shu
EPI554811	HA	China	1996-Apr-30	B/shenfang/102/1996	WHO Chinese National Influenza Center	WHO Chinese National Influenza Center	Xiaoxu Zeng,Xiyan Li,Xiang Zhao,Yanhui Cheng,minju Tan,Weijuan Huang,Dayan Wang,Dexin Li,Yuelong Shu
EPI554808	HA	China	1996-Jan-23	B/jingfang/39/1996	WHO Chinese National Influenza Center	WHO Chinese National Influenza Center	Xiaoxu Zeng,Xiyan Li,Xiang Zhao,Yanhui Cheng,minju Tan,Weijuan Huang,Dayan Wang,Dexin Li,Yuelong Shu
EPI554784	HA	China	2014-Aug-24	B/Shanghai-Pudongxin/11331/2014	WHO Chinese National Influenza Center	WHO Chinese National Influenza Center	Xiaoxu Zeng,Xiyan Li,Xiang Zhao,Yanhui Cheng,minju Tan,Weijuan Huang,Dayan Wang,Dexin Li,Yuelong Shu
EPI554745	HA	China	2014-Jul-13	B/Fujian-Gulou/11550/2014	WHO Chinese National Influenza Center	WHO Chinese National Influenza Center	Xiaoxu Zeng,Xiyan Li,Xiang Zhao,Yanhui Cheng,minju Tan,Weijuan Huang,Dayan Wang,Dexin Li,Yuelong Shu
EPI554621	HA	Lao, People's Democratic Republic	2014-Sep-08	B/Laos/911/2014	National Center for Laboratory and Epidemiology	Centers for Disease Control and Prevention
EPI554596	HA	Brazil	2014-Dec-17	B/Sao Paulo/97623/2014	Instituto Adolfo Lutz	Instituto Adolfo Lutz	Santos,Katia;Silva,Daniela;Benega,Margarete;Paulino,Renato;Santos,Cecilia;Paiva,Terezinha
EPI554593	HA	Brazil	2014-Dec-09	B/Sao Paulo/96303/2014	Instituto Adolfo Lutz	Instituto Adolfo Lutz	Santos,Katia;Silva,Daniela;Benega,Margarete;Paulino,Renato;Santos,Cecilia;Paiva,Terezinha
EPI554550	HA	Lao, People's Democratic Republic	2014-Aug-11	B/Laos/I796/2014	Ministry of Health Laos	National Institute of Infectious Diseases (NIID)	Takashita,Emi; Fujisaki,Seiichiro; Shirakura,Masayuki; Watanabe,Shinji; Odagiri,Takato
EPI553163	HA	Norway	2014-Nov-17	B/Norway/3053/2015	St. Olavs Hospital HF, Dept. of Medical Microbiology	Norwegian Institute of Public Health	Bragstad K, Dudman SG, Waalen K, Hungnes O
EPI552475	HA	United States	2014-Oct-17	B/Maryland/15/2014	Maryland Department of Health and Mental Hygiene	Centers for Disease Control and Prevention
EPI552472	HA	Lao, People's Democratic Republic	2014-Jun-02	B/Laos/545/2014	National Center for Laboratory and Epidemiology	Centers for Disease Control and Prevention
EPI552460	HA	United States	2014-Sep-24	B/Florida/48/2014	Florida Department of Health-Jacksonville	Centers for Disease Control and Prevention
EPI552049	HA	Jordan	2014-May-14	B/Jordan/30244/2014	Laboratory Directorate	National Institute for Medical Research
EPI552047	HA	Jordan	2014-May-22	B/Jordan/20358/2014	Laboratory Directorate	National Institute for Medical Research
EPI551342	HA	New Zealand	2014-Jul-20	B/WELLINGTON/010/2014	Institute of Environmental Science & Research	WHO Collaborating Centre for Reference and Research on Influenza	Deng,Y-M.; Iannello,P.; Spirason,N.; Jelley,L.; Lau,H.; Komadina,N.
EPI551283	HA	Australia	2014-Aug-11	B/NEWCASTLE/21/2014	John Hunter Hospital	WHO Collaborating Centre for Reference and Research on Influenza	Deng,Y-M.; Iannello,P.; Spirason,N.; Jelley,L.; Lau,H.; Komadina,N.
EPI551122	HA	China	2014-Sep-02	B/Fujian-Gulou/11947/2014	WHO Chinese National Influenza Center	WHO Chinese National Influenza Center	Xiaoxu Zeng, Xiyan Li
EPI550809	HA	United States	2014-Oct-21	B/Pennsylvania/04/2014	Pennsylvania Department of Health	Centers for Disease Control and Prevention
EPI550797	HA	United States	2014-Oct-22	B/Utah/20/2014	Utah Department of Health	Centers for Disease Control and Prevention
EPI549758	HA	Egypt	2014-Jan-01	B/Egypt/ALX6641/2014	Ministry of Health and Population	National Institute for Medical Research
EPI548556	HA	Lao, People's Democratic Republic	2014-Feb-24	B/Laos/I206/2014	Ministry of Health Laos	National Institute of Infectious Diseases (NIID)	Takashita,Emi; Fujisaki,Seiichiro; Shirakura,Masayuki; Watanabe,Shinji; Odagiri,Takato
EPI548548	HA	Lao, People's Democratic Republic	2014-Feb-03	B/Laos/I129/2014	Ministry of Health Laos	National Institute of Infectious Diseases (NIID)	Takashita,Emi; Fujisaki,Seiichiro; Shirakura,Masayuki; Watanabe,Shinji; Odagiri,Takato
EPI548546	HA	Lao, People's Democratic Republic	2014-Jan-13	B/Laos/I070/2014	Ministry of Health Laos	National Institute of Infectious Diseases (NIID)	Takashita,Emi; Fujisaki,Seiichiro; Shirakura,Masayuki; Watanabe,Shinji; Odagiri,Takato
EPI544385	HA	Costa Rica	2014-Jul-15	B/Costa Rica/2777/2014	Laboratorio Nacional de Influenza	Centers for Disease Control and Prevention
EPI544267	HA	Thailand	2013-Nov-21	B/Phuket/3073/2013	WHO Collaborating Centre for Reference and Research on Influenza	Centers for Disease Control and Prevention
EPI544252	HA	United States	2014-Aug-23	B/California/26/2014	California Department of Health Services	Centers for Disease Control and Prevention
EPI544232	HA	Indonesia	2014-Feb-11	B/Indonesia/Nihrdi-Plk 198/2014	Ministry of Health, NIHRD	Centers for Disease Control and Prevention
EPI543657	HA	Paraguay	2014-Jul-01	B/Paraguay/57/2014	Central Laboratory of Public Health	Centers for Disease Control and Prevention
EPI543636	HA	Uruguay	2014-Jun-02	B/Uruguay/143/2014	Departamento de Laboratorio de Salud Publica	Centers for Disease Control and Prevention
EPI543243	HA	United States	2014-Jul-27	B/Florida/27/2014	Florida Department of Health-Tampa	Centers for Disease Control and Prevention
EPI543176	HA	Cameroon	2014-Feb-19	B/Cameroon/1044/2014	Centre Pasteur du Cameroun	National Institute for Medical Research
EPI543170	HA	Argentina	2014-Jun-19	B/Santa Fe/1211/2014	Instituto Nacional de Enfermedades Infecciosas	National Institute for Medical Research
EPI543161	HA	Argentina	2014-Jun-03	B/Buenos Aires/10986152/2014	Instituto Nacional de Enfermedades Infecciosas	National Institute for Medical Research
EPI541716	HA	Brazil	2014-May-27	B/Acre/130605-IEC/2014	National Influenza Center	Centers for Disease Control and Prevention
EPI541510	HA	Thailand	2013-Nov-21	B/PHUKET/3073/2013	WHO Collaborating Centre for Reference and Research on Influenza	National Institute of Infectious Diseases (NIID)	Takashita,Emi; Fujisaki,Seiichiro; Shirakura,Masayuki; Odagiri,Takato
EPI541345	HA	Thailand	2014-Apr-17	B/PRACHUAP KHIRI KHAN/233/2014	WHO National Influenza Centre, National Institute of Medical Research (NIMR)	WHO Collaborating Centre for Reference and Research on Influenza	Deng,Y-M.; Iannello,P.; Spirason,N.; Jelley,L.; Lau,H.; Komadina,N.
EPI541334	HA	Mongolia	2014-Feb-25	B/ULAANBAATAR/1604/2014	National Influenza Center	WHO Collaborating Centre for Reference and Research on Influenza	Deng,Y-M.; Iannello,P.; Spirason,N.; Jelley,L.; Lau,H.; Komadina,N.
EPI541306	HA	Australia	2013-Sep-24	B/TASMANIA/10/2013	Royal Hobart Hospital	WHO Collaborating Centre for Reference and Research on Influenza	Deng,Y-M.; Iannello,P.; Spirason,N.; Jelley,L.; Lau,H.; Komadina,N.
EPI541241	HA	Australia	2014-Mar-07	B/BRISBANE/8/2014	Queensland Health Scientific Services	WHO Collaborating Centre for Reference and Research on Influenza	Deng,Y-M.; Iannello,P.; Spirason,N.; Jelley,L.; Lau,H.; Komadina,N.
EPI541120	HA	Brazil	2014-Aug-13	B/Sao Paulo/69693/2014	Instituto Adolfo Lutz	Instituto Adolfo Lutz	Santos,Katia;Silva,Daniela;Benega,Margarete;Paulino,Renato;Santos,Cecilia;Paiva,Terezinha
EPI540782	HA	Australia	2014-Apr-04	B/NEWCASTLE/3/2014	John Hunter Hospital, Virology Unit, Clinical Microbiology	WHO Collaborating Centre for Reference and Research on Influenza	Deng,Y-M.; Iannello,P.; Spirason,N.; Jelley,L.; Lau,H.; Komadina,N.
EPI540756	HA	Australia	2014-May-17	B/SOUTH AUSTRALIA/7/2014	Institute of Medical and Veterinary Science (IMVS)	WHO Collaborating Centre for Reference and Research on Influenza	Deng,Y-M.; Iannello,P.; Spirason,N.; Jelley,L.; Lau,H.; Komadina,N.
EPI540663	HA	Norway	2014-May-21	B/Norway/1877/2014	WHO National Influenza Centre	National Institute for Medical Research
EPI540627	HA	Cameroon	2014-Mar-10	B/Cameroon/1640/2014	Centre Pasteur du Cameroun	National Institute for Medical Research
EPI540610	HA	United States	2014-Jul-03	B/Florida/26/2014	Florida Department of Health-Jacksonville	Centers for Disease Control and Prevention
EPI540603	HA	United States	2014-May-18	B/Michigan/02/2014	Michigan Department of Community Health	Centers for Disease Control and Prevention
EPI540578	HA	Bangladesh	2014-Jun-28	B/Bangladesh/4961/2014	Institute of Epidemiology Disease Control and Research (IEDCR) & Bangladesh National Influenza Centre (NIC)	Centers for Disease Control and Prevention
EPI539432	HA	Israel	2014-Mar-07	B/Israel/Z-1510/2014	Central Virology Laboratory Israel (NIC)	National Institute for Medical Research
EPI539380	HA	Japan	2014-May-10	B/NAGANO/2310/2014	Nagano Environmental Conservation Research Institute	National Institute of Infectious Diseases (NIID)	Takashita,Emi; Fujisaki,Seiichiro; Shirakura,Masayuki; Ejima,Miho; Tashiro,Masato; Odagiri,Takato
EPI538201	HA	United States	2014-Jun-18	B/Vermont/01/2014	Vermont Department of Health Laboratory	Centers for Disease Control and Prevention
EPI538155	HA	Sweden	2013-Feb-04	B/Stockholm/03/2013	National Institute for Medical Research	Centers for Disease Control and Prevention
EPI538113	HA	China	2014-Apr-06	B/Shanghai-Xuhui/1325/2014	WHO Chinese National Influenza Center	Centers for Disease Control and Prevention
EPI536581	HA	United States	2014-Jun-04	B/Utah/08/2014	Utah Department of Health	Centers for Disease Control and Prevention
EPI536555	HA	Puerto Rico	2014-Apr-15	B/Puerto Rico/01/2014	Puerto Rico Department of Health	Centers for Disease Control and Prevention
EPI536552	HA	Brazil	2014-Feb-27	B/Brazil/2920/2014	Instituto Adolfo Lutz	Centers for Disease Control and Prevention
EPI536531	HA	United States	2014-Jun-09	B/Alaska/03/2014	Alaska State Virology Lab	Centers for Disease Control and Prevention
EPI536461	HA	Russian Federation	2014-Apr-25	B/Khabarovsk/14/2014	WHO National Influenza Centre Russian Federation	National Institute for Medical Research
EPI536439	HA	Gambia	2013-Oct-19	B/Gambia/G0141836/2013		National Institute for Medical Research
EPI536425	HA	Austria	2014-Mar-10	B/Austria/783231/2014	University of Vienna	National Institute for Medical Research
EPI534718	HA	Japan	2014-Jan-21	B/YOKOHAMA/27/2014	Yokohama City Institute of Health	National Institute of Infectious Diseases (NIID)	Takashita,Emi; Fujisaki,Seiichiro; Shirakura,Masayuki; Ejima,Miho; Tashiro,Masato; Odagiri,Takato
EPI534706	HA	Japan	2014-Mar-08	B/HAMAMATU-C/14151/2014	Hamamatsu City Health Environment Research Center	National Institute of Infectious Diseases (NIID)	Takashita,Emi; Fujisaki,Seiichiro; Shirakura,Masayuki; Ejima,Miho; Tashiro,Masato; Odagiri,Takato
EPI534682	HA	Taiwan	2014-Apr-01	B/Taiwan/132/2014	Center for Disease Control	National Institute of Infectious Diseases (NIID)	Takashita,Emi; Fujisaki,Seiichiro; Shirakura,Masayuki; Ejima,Miho; Tashiro,Masato; Odagiri,Takato
EPI534676	HA	Taiwan	2014-Mar-20	B/Taiwan/63/2014	Center for Disease Control	National Institute of Infectious Diseases (NIID)	Takashita,Emi; Fujisaki,Seiichiro; Shirakura,Masayuki; Ejima,Miho; Tashiro,Masato; Odagiri,Takato
EPI534674	HA	Japan	2014-Feb-21	B/TOCHIGI/14215/2014	Tochigi Prefectural Institute of Public Health and Environmental Science	National Institute of Infectious Diseases (NIID)	Takashita,Emi; Fujisaki,Seiichiro; Shirakura,Masayuki; Ejima,Miho; Tashiro,Masato; Odagiri,Takato
EPI533649	HA	United States	2014-Apr-11	B/California/16/2014	California Department of Health Services	Centers for Disease Control and Prevention
EPI533366	HA	Netherlands	2014-Mar-26	B/Bilthoven/4311400416/2014	National Institute for Public Health and the Environment (RIVM)	National Institute for Public Health and the Environment (RIVM)	Meijer, A.;Overduin, P.
EPI533285	HA	Netherlands	2013-Mar-12	B/Bilthoven/4311300591/2013	National Institute for Public Health and the Environment (RIVM)	National Institute for Public Health and the Environment (RIVM)	Meijer, A.;Overduin, P.
EPI533279	HA	Netherlands	2013-Feb-07	B/Bilthoven/4311300311/2013	National Institute for Public Health and the Environment (RIVM)	National Institute for Public Health and the Environment (RIVM)	Meijer, A.;Overduin, P.
EPI533074	HA	Ukraine	2014-Mar-12	B/Kharkov/210/2014	Institute of Epidemiology and Infectious Diseases AMS of Ukraine	National Institute for Medical Research
EPI532990	HA	Japan	2014-Mar-15	B/FUKUOKA-C/1/2014	Fukuoka City Institute for Hygiene and the Environment	National Institute of Infectious Diseases (NIID)	Takashita,Emi; Fujisaki,Seiichiro; Shirakura,Masayuki; Ejima,Miho; Tashiro,Masato; Odagiri,Takato
EPI532945	HA	United States	2014-Apr-02	B/Texas/08/2014	Texas Department of State Health Services-Laboratory Services	Centers for Disease Control and Prevention
EPI532942	HA	United States	2014-Mar-05	B/Washington/03/2014	Washington State Public Health Laboratory	Centers for Disease Control and Prevention
EPI532914	HA	Guadeloupe	2014-Feb-17	B/Guadeloupe/8256/2014	National Influenza Center French Guiana and French Indies	Centers for Disease Control and Prevention
EPI532265	HA	United States	2014-Apr-21	B/Wyoming/3894/2014		Other Database Import	Connors,B.C.; Jones,S.L.; Bisaha,S.A.; Canas,L.C.; Baker,J.A.; Couch,M.R.; Garrett,C.M.; Powell,M.L.; Hanson,J.F.; Yohannes,R.A.; DeMarcus,L.S.; Smith,J.P.; Fumia,K.F.; Zorich,S.C.; Macias,E.A.; Olsen,E.T.; Sjoberg,P.A.
EPI532253	HA	United States	2014-Feb-20	B/North Carolina/3882/2014		Other Database Import	Connors,B.C.; Jones,S.L.; Bisaha,S.A.; Canas,L.C.; Baker,J.A.; Couch,M.R.; Garrett,C.M.; Powell,M.L.; Hanson,J.F.; Yohannes,R.A.; DeMarcus,L.S.; Smith,J.P.; Fumia,K.F.; Zorich,S.C.; Macias,E.A.; Olsen,E.T.; Sjoberg,P.A.
EPI532244	HA	United States	2014-Apr-09	B/New York/3873/2014		Other Database Import	Connors,B.C.; Jones,S.L.; Bisaha,S.A.; Canas,L.C.; Baker,J.A.; Couch,M.R.; Garrett,C.M.; Powell,M.L.; Hanson,J.F.; Yohannes,R.A.; DeMarcus,L.S.; Smith,J.P.; Fumia,K.F.; Zorich,S.C.; Macias,E.A.; Olsen,E.T.; Sjoberg,P.A.
EPI532233	HA	United States	2014-Mar-25	B/New Jersey/3862/2014		Other Database Import	Connors,B.C.; Jones,S.L.; Bisaha,S.A.; Canas,L.C.; Baker,J.A.; Couch,M.R.; Garrett,C.M.; Powell,M.L.; Hanson,J.F.; Yohannes,R.A.; DeMarcus,L.S.; Smith,J.P.; Fumia,K.F.; Zorich,S.C.; Macias,E.A.; Olsen,E.T.; Sjoberg,P.A.
EPI532224	HA	United States	2014-Mar-31	B/Kansas/3853/2014		Other Database Import	Connors,B.C.; Jones,S.L.; Bisaha,S.A.; Canas,L.C.; Baker,J.A.; Couch,M.R.; Garrett,C.M.; Powell,M.L.; Hanson,J.F.; Yohannes,R.A.; DeMarcus,L.S.; Smith,J.P.; Fumia,K.F.; Zorich,S.C.; Macias,E.A.; Olsen,E.T.; Sjoberg,P.A.
EPI531447	HA	Sweden	2014-Apr-12	B/Malmoe/2/2014		Swedish Institute for Infectious Disease Control
EPI531144	HA	United States	2014-Apr-29	B/Florida/06/2014	Florida Department of Health-Jacksonville	Centers for Disease Control and Prevention
EPI529386	HA	Cambodia	2013-Nov-25	B/CAMBODIA/X1126384/2013	Institute Pasteur du Cambodia	WHO Collaborating Centre for Reference and Research on Influenza	Deng,Y-M.; Iannello,P.; Spirason,N.; Jelley,L.; Lau,H.; Komadina,N.
EPI529357	HA	Australia	2013-Dec-14	B/DARWIN/46/2013	Royal Darwin Hospital	WHO Collaborating Centre for Reference and Research on Influenza	Deng,Y-M.; Iannello,P.; Spirason,N.; Jelley,L.; Lau,H.; Komadina,N.
EPI529043	HA	Nicaragua	2012-Oct-10	B/Nicaragua/AGB2-17/2012		Other Database Import	Wentworth,D.E.; Halpin,R.A.; Lin,X.; Bera,J.; Akopov,A.; Ransier,A.; Mohan,M.; Fedorova,N.; Tsitrin,T.; Puri,V.; Stockwell,T.; Amedeo,P.; Appalla,L.; Bishop,B.; Edworthy,P.; Gupta,N.; Hoover,J.; Katzel,D.; Li,K.; Schobel,S.; Shrivastava,S.; Thovarai,V.; Wang,S.; Bao,Y.; Sanders,R.; Zhdanov,S.; Kiryutin,B.; Lipman,D.J.; Tatusova,T.; Gordon,A.
EPI529028	HA	Nicaragua	2012-Jul-28	B/Nicaragua/AGB2-25/2012		Other Database Import	Wentworth,D.E.; Halpin,R.A.; Lin,X.; Bera,J.; Akopov,A.; Ransier,A.; Mohan,M.; Fedorova,N.; Tsitrin,T.; Puri,V.; Stockwell,T.; Amedeo,P.; Appalla,L.; Bishop,B.; Edworthy,P.; Gupta,N.; Hoover,J.; Katzel,D.; Li,K.; Schobel,S.; Shrivastava,S.; Thovarai,V.; Wang,S.; Bao,Y.; Sanders,R.; Zhdanov,S.; Kiryutin,B.; Lipman,D.J.; Tatusova,T.; Gordon,A.
EPI528789	HA	United States	2014-Jan-27	B/California/NHRC419334/2014		Other Database Import	Thammavong,H.; Balansay-Ames,M.; Hawksworth,A.; Myers,C.A.; Connors,B.; de Mattos,C.; Brice,G.
EPI520219	HA	United States	2012-Jun-25	B/New York/1384/2012		Other Database Import	Wentworth,D.E.; Halpin,R.A.; Lin,X.; Bera,J.; Akopov,A.; Ransier,A.; Mohan,M.; Fedorova,N.; Tsitrin,T.; Stockwell,T.; Amedeo,P.; Appalla,L.; Bishop,B.; Edworthy,P.; Gupta,N.; Hoover,J.; Katzel,D.; Li,K.; Schobel,S.; Shrivastava,S.; Thovarai,V.; Wang,S.; Griesemer,S.B.; Bao,Y.; Sanders,R.; Zhdanov,S.; Kiryutin,B.; Lipman,D.J.; Tatusova,T.; St. George,K.
EPI520043	HA	United States	2012-Apr-08	B/New York/1349/2012		Other Database Import	Wentworth,D.E.; Halpin,R.A.; Lin,X.; Bera,J.; Akopov,A.; Ransier,A.; Mohan,M.; Fedorova,N.; Tsitrin,T.; Stockwell,T.; Amedeo,P.; Appalla,L.; Bishop,B.; Edworthy,P.; Gupta,N.; Hoover,J.; Katzel,D.; Li,K.; Schobel,S.; Shrivastava,S.; Thovarai,V.; Wang,S.; Griesemer,S.B.; Bao,Y.; Sanders,R.; Zhdanov,S.; Kiryutin,B.; Lipman,D.J.; Tatusova,T.; St. George,K.
EPI520011	HA	United States	2012-Mar-29	B/New York/1345/2012		Other Database Import	Wentworth,D.E.; Halpin,R.A.; Lin,X.; Bera,J.; Akopov,A.; Ransier,A.; Mohan,M.; Fedorova,N.; Tsitrin,T.; Stockwell,T.; Amedeo,P.; Appalla,L.; Bishop,B.; Edworthy,P.; Gupta,N.; Hoover,J.; Katzel,D.; Li,K.; Schobel,S.; Shrivastava,S.; Thovarai,V.; Wang,S.; Griesemer,S.B.; Bao,Y.; Sanders,R.; Zhdanov,S.; Kiryutin,B.; Lipman,D.J.; Tatusova,T.; St. George,K.
EPI519915	HA	United States	2012-Feb-28	B/New York/1333/2012		Other Database Import	Wentworth,D.E.; Halpin,R.A.; Lin,X.; Bera,J.; Akopov,A.; Ransier,A.; Mohan,M.; Fedorova,N.; Tsitrin,T.; Stockwell,T.; Amedeo,P.; Appalla,L.; Bishop,B.; Edworthy,P.; Gupta,N.; Hoover,J.; Katzel,D.; Li,K.; Schobel,S.; Shrivastava,S.; Thovarai,V.; Wang,S.; Griesemer,S.B.; Bao,Y.; Sanders,R.; Zhdanov,S.; Kiryutin,B.; Lipman,D.J.; Tatusova,T.; St. George,K.
EPI519811	HA	United States	2011-Mar-15	B/New York/1295/2011		Other Database Import	Wentworth,D.E.; Halpin,R.A.; Lin,X.; Bera,J.; Akopov,A.; Ransier,A.; Mohan,M.; Fedorova,N.; Tsitrin,T.; Stockwell,T.; Amedeo,P.; Appalla,L.; Bishop,B.; Edworthy,P.; Gupta,N.; Hoover,J.; Katzel,D.; Li,K.; Schobel,S.; Shrivastava,S.; Thovarai,V.; Wang,S.; Griesemer,S.B.; Bao,Y.; Sanders,R.; Zhdanov,S.; Kiryutin,B.; Lipman,D.J.; Tatusova,T.; St. George,K.
EPI519643	HA	United States	2011-Feb-08	B/New York/1271/2011		Other Database Import	Wentworth,D.E.; Halpin,R.A.; Lin,X.; Bera,J.; Akopov,A.; Ransier,A.; Mohan,M.; Fedorova,N.; Tsitrin,T.; Stockwell,T.; Amedeo,P.; Appalla,L.; Bishop,B.; Edworthy,P.; Gupta,N.; Hoover,J.; Katzel,D.; Li,K.; Schobel,S.; Shrivastava,S.; Thovarai,V.; Wang,S.; Griesemer,S.B.; Bao,Y.; Sanders,R.; Zhdanov,S.; Kiryutin,B.; Lipman,D.J.; Tatusova,T.; St. George,K.
EPI519627	HA	United States	2011-Feb-07	B/New York/1269/2011		Other Database Import	Wentworth,D.E.; Halpin,R.A.; Lin,X.; Bera,J.; Akopov,A.; Ransier,A.; Mohan,M.; Fedorova,N.; Tsitrin,T.; Stockwell,T.; Amedeo,P.; Appalla,L.; Bishop,B.; Edworthy,P.; Gupta,N.; Hoover,J.; Katzel,D.; Li,K.; Schobel,S.; Shrivastava,S.; Thovarai,V.; Wang,S.; Griesemer,S.B.; Bao,Y.; Sanders,R.; Zhdanov,S.; Kiryutin,B.; Lipman,D.J.; Tatusova,T.; St. George,K.
EPI519523	HA	United States	2011-Jan-31	B/New York/1254/2011		Other Database Import	Wentworth,D.E.; Halpin,R.A.; Lin,X.; Bera,J.; Akopov,A.; Ransier,A.; Mohan,M.; Fedorova,N.; Tsitrin,T.; Stockwell,T.; Amedeo,P.; Appalla,L.; Bishop,B.; Edworthy,P.; Gupta,N.; Hoover,J.; Katzel,D.; Li,K.; Schobel,S.; Shrivastava,S.; Thovarai,V.; Wang,S.; Griesemer,S.B.; Bao,Y.; Sanders,R.; Zhdanov,S.; Kiryutin,B.; Lipman,D.J.; Tatusova,T.; St. George,K.
EPI519451	HA	United States	2011-Jan-10	B/New York/1245/2011		Other Database Import	Wentworth,D.E.; Halpin,R.A.; Lin,X.; Bera,J.; Akopov,A.; Ransier,A.; Mohan,M.; Fedorova,N.; Tsitrin,T.; Stockwell,T.; Amedeo,P.; Appalla,L.; Bishop,B.; Edworthy,P.; Gupta,N.; Hoover,J.; Katzel,D.; Li,K.; Schobel,S.; Shrivastava,S.; Thovarai,V.; Wang,S.; Griesemer,S.B.; Bao,Y.; Sanders,R.; Zhdanov,S.; Kiryutin,B.; Lipman,D.J.; Tatusova,T.; St. George,K.
EPI519355	HA	United States	2009-Feb-26	B/New York/1221/2009		Other Database Import	Wentworth,D.E.; Halpin,R.A.; Lin,X.; Bera,J.; Akopov,A.; Ransier,A.; Mohan,M.; Fedorova,N.; Tsitrin,T.; Stockwell,T.; Amedeo,P.; Appalla,L.; Bishop,B.; Edworthy,P.; Gupta,N.; Hoover,J.; Katzel,D.; Li,K.; Schobel,S.; Shrivastava,S.; Thovarai,V.; Wang,S.; Griesemer,S.B.; Bao,Y.; Sanders,R.; Zhdanov,S.; Kiryutin,B.; Lipman,D.J.; Tatusova,T.; St. George,K.
EPI519227	HA	United States	2009-Feb-09	B/New York/1205/2009		Other Database Import	Wentworth,D.E.; Halpin,R.A.; Lin,X.; Bera,J.; Akopov,A.; Ransier,A.; Mohan,M.; Fedorova,N.; Tsitrin,T.; Stockwell,T.; Amedeo,P.; Appalla,L.; Bishop,B.; Edworthy,P.; Gupta,N.; Hoover,J.; Katzel,D.; Li,K.; Schobel,S.; Shrivastava,S.; Thovarai,V.; Wang,S.; Griesemer,S.B.; Bao,Y.; Sanders,R.; Zhdanov,S.; Kiryutin,B.; Lipman,D.J.; Tatusova,T.; St. George,K.
EPI518146	HA	United States	2001-Feb-27	B/New York/1044/2001		Other Database Import	Wentworth,D.E.; Halpin,R.A.; Lin,X.; Bera,J.; Akopov,A.; Ransier,A.; Mohan,M.; Fedorova,N.; Tsitrin,T.; Stockwell,T.; Amedeo,P.; Appalla,L.; Bishop,B.; Edworthy,P.; Gupta,N.; Hoover,J.; Katzel,D.; Li,K.; Schobel,S.; Shrivastava,S.; Thovarai,V.; Wang,S.; Griesemer,S.B.; Bao,Y.; Sanders,R.; Zhdanov,S.; Kiryutin,B.; Lipman,D.J.; Tatusova,T.; St. George,K.
EPI518082	HA	United States	2001-Feb-05	B/New York/1035/2001		Other Database Import	Wentworth,D.E.; Halpin,R.A.; Lin,X.; Bera,J.; Akopov,A.; Ransier,A.; Mohan,M.; Fedorova,N.; Tsitrin,T.; Stockwell,T.; Amedeo,P.; Appalla,L.; Bishop,B.; Edworthy,P.; Gupta,N.; Hoover,J.; Katzel,D.; Li,K.; Schobel,S.; Shrivastava,S.; Thovarai,V.; Wang,S.; Griesemer,S.B.; Bao,Y.; Sanders,R.; Zhdanov,S.; Kiryutin,B.; Lipman,D.J.; Tatusova,T.; St. George,K.
EPI517962	HA	United States	1999-May-01	B/New York/1020/1999		Other Database Import	Wentworth,D.E.; Halpin,R.A.; Lin,X.; Bera,J.; Akopov,A.; Ransier,A.; Mohan,M.; Fedorova,N.; Tsitrin,T.; Stockwell,T.; Amedeo,P.; Appalla,L.; Bishop,B.; Edworthy,P.; Gupta,N.; Hoover,J.; Katzel,D.; Li,K.; Schobel,S.; Shrivastava,S.; Thovarai,V.; Wang,S.; Griesemer,S.B.; Bao,Y.; Sanders,R.; Zhdanov,S.; Kiryutin,B.; Lipman,D.J.; Tatusova,T.; St. George,K.
EPI517802	HA	United States	1993-Feb-02	B/New York/1000/1993		Other Database Import	Wentworth,D.E.; Halpin,R.A.; Lin,X.; Bera,J.; Akopov,A.; Ransier,A.; Mohan,M.; Fedorova,N.; Tsitrin,T.; Stockwell,T.; Amedeo,P.; Appalla,L.; Bishop,B.; Edworthy,P.; Gupta,N.; Hoover,J.; Katzel,D.; Li,K.; Schobel,S.; Shrivastava,S.; Thovarai,V.; Wang,S.; Griesemer,S.B.; Bao,Y.; Sanders,R.; Zhdanov,S.; Kiryutin,B.; Lipman,D.J.; Tatusova,T.; St. George,K.
EPI517756	HA	United States	2012-May-25	B/New York/1383/2012		Other Database Import	Wentworth,D.E.; Halpin,R.A.; Lin,X.; Bera,J.; Akopov,A.; Ransier,A.; Mohan,M.; Fedorova,N.; Tsitrin,T.; Stockwell,T.; Amedeo,P.; Appalla,L.; Bishop,B.; Edworthy,P.; Gupta,N.; Hoover,J.; Katzel,D.; Li,K.; Schobel,S.; Shrivastava,S.; Thovarai,V.; Wang,S.; Griesemer,S.B.; Bao,Y.; Sanders,R.; Zhdanov,S.; Kiryutin,B.; Lipman,D.J.; Tatusova,T.; St. George,K.
EPI517706	HA	United States	2012-Apr-30	B/New York/1368/2012		Other Database Import	Wentworth,D.E.; Halpin,R.A.; Lin,X.; Bera,J.; Akopov,A.; Ransier,A.; Mohan,M.; Fedorova,N.; Tsitrin,T.; Stockwell,T.; Amedeo,P.; Appalla,L.; Bishop,B.; Edworthy,P.; Gupta,N.; Hoover,J.; Katzel,D.; Li,K.; Schobel,S.; Shrivastava,S.; Thovarai,V.; Wang,S.; Griesemer,S.B.; Bao,Y.; Sanders,R.; Zhdanov,S.; Kiryutin,B.; Lipman,D.J.; Tatusova,T.; St. George,K.
EPI517602	HA	United States	2005-Apr-04	B/New York/1084/2005		Other Database Import	Wentworth,D.E.; Halpin,R.A.; Lin,X.; Bera,J.; Akopov,A.; Ransier,A.; Mohan,M.; Fedorova,N.; Tsitrin,T.; Stockwell,T.; Amedeo,P.; Appalla,L.; Bishop,B.; Edworthy,P.; Gupta,N.; Hoover,J.; Katzel,D.; Li,K.; Schobel,S.; Shrivastava,S.; Thovarai,V.; Wang,S.; Griesemer,S.B.; Bao,Y.; Sanders,R.; Zhdanov,S.; Kiryutin,B.; Lipman,D.J.; Tatusova,T.; St. George,K.
EPI517590	HA	United States	2008-Jan-15	B/New York/1141/2008		Other Database Import	Wentworth,D.E.; Halpin,R.A.; Lin,X.; Bera,J.; Akopov,A.; Ransier,A.; Mohan,M.; Fedorova,N.; Tsitrin,T.; Stockwell,T.; Amedeo,P.; Appalla,L.; Bishop,B.; Edworthy,P.; Gupta,N.; Hoover,J.; Katzel,D.; Li,K.; Schobel,S.; Shrivastava,S.; Thovarai,V.; Wang,S.; Griesemer,S.B.; Bao,Y.; Sanders,R.; Zhdanov,S.; Kiryutin,B.; Lipman,D.J.; Tatusova,T.; St. George,K.
EPI517527	HA	United States	2012-Dec-31	B/Chicago/YGB_04004/2012		Other Database Import	Wentworth,D.E.; Halpin,R.A.; Lin,X.; Bera,J.; Akopov,A.; Ransier,A.; Mohan,M.; Fedorova,N.; Tsitrin,T.; Stockwell,T.; Amedeo,P.; Appalla,L.; Bishop,B.; Edworthy,P.; Gupta,N.; Hoover,J.; Katzel,D.; Li,K.; Schobel,S.; Shrivastava,S.; Thovarai,V.; Wang,S.; Landon,E.; Tesic,V.; Nash,C.; Bao,Y.; Sanders,R.; Zhdanov,S.; Kiryutin,B.; Lipman,D.J.; Tatusova,T.; Grad,Y.
EPI517503	HA	United States	2013-Apr-08	B/Boston/YGB_02022/2013		Other Database Import	Wentworth,D.E.; Halpin,R.A.; Lin,X.; Bera,J.; Akopov,A.; Ransier,A.; Mohan,M.; Fedorova,N.; Tsitrin,T.; Stockwell,T.; Amedeo,P.; Appalla,L.; Bishop,B.; Edworthy,P.; Gupta,N.; Hoover,J.; Katzel,D.; Li,K.; Schobel,S.; Shrivastava,S.; Thovarai,V.; Wang,S.; Bao,Y.; Sanders,R.; Zhdanov,S.; Kiryutin,B.; Lipman,D.J.; Tatusova,T.; Grad,Y.
EPI517495	HA	United States	2013-Apr-05	B/Boston/YGB_02021/2013		Other Database Import	Wentworth,D.E.; Halpin,R.A.; Lin,X.; Bera,J.; Akopov,A.; Ransier,A.; Mohan,M.; Fedorova,N.; Tsitrin,T.; Stockwell,T.; Amedeo,P.; Appalla,L.; Bishop,B.; Edworthy,P.; Gupta,N.; Hoover,J.; Katzel,D.; Li,K.; Schobel,S.; Shrivastava,S.; Thovarai,V.; Wang,S.; Bao,Y.; Sanders,R.; Zhdanov,S.; Kiryutin,B.; Lipman,D.J.; Tatusova,T.; Grad,Y.
EPI517399	HA	United States	2013-Apr-09	B/Boston/YGB_01045/2013		Other Database Import	Wentworth,D.E.; Halpin,R.A.; Lin,X.; Bera,J.; Akopov,A.; Ransier,A.; Mohan,M.; Fedorova,N.; Tsitrin,T.; Stockwell,T.; Amedeo,P.; Appalla,L.; Bishop,B.; Edworthy,P.; Gupta,N.; Hoover,J.; Katzel,D.; Li,K.; Schobel,S.; Shrivastava,S.; Thovarai,V.; Wang,S.; Wilson,H.; Braidt,J.; Rosenberg,E.; Bao,Y.; Sanders,R.; Zhdanov,S.; Kiryutin,B.; Lipman,D.J.; Tatusova,T.; Grad,Y.
EPI517304	HA	United States	2013-Mar-29	B/Boston/YGB_01030/2013		Other Database Import	Wentworth,D.E.; Halpin,R.A.; Lin,X.; Bera,J.; Akopov,A.; Ransier,A.; Mohan,M.; Fedorova,N.; Tsitrin,T.; Stockwell,T.; Amedeo,P.; Appalla,L.; Bishop,B.; Edworthy,P.; Gupta,N.; Hoover,J.; Katzel,D.; Li,K.; Schobel,S.; Shrivastava,S.; Thovarai,V.; Wang,S.; Wilson,H.; Braidt,J.; Rosenberg,E.; Bao,Y.; Sanders,R.; Zhdanov,S.; Kiryutin,B.; Lipman,D.J.; Tatusova,T.; Grad,Y.
EPI517296	HA	United States	2013-Mar-25	B/Boston/YGB_01025/2013		Other Database Import	Wentworth,D.E.; Halpin,R.A.; Lin,X.; Bera,J.; Akopov,A.; Ransier,A.; Mohan,M.; Fedorova,N.; Tsitrin,T.; Stockwell,T.; Amedeo,P.; Appalla,L.; Bishop,B.; Edworthy,P.; Gupta,N.; Hoover,J.; Katzel,D.; Li,K.; Schobel,S.; Shrivastava,S.; Thovarai,V.; Wang,S.; Wilson,H.; Braidt,J.; Rosenberg,E.; Bao,Y.; Sanders,R.; Zhdanov,S.; Kiryutin,B.; Lipman,D.J.; Tatusova,T.; Grad,Y.
EPI516868	HA	United States	2014-Feb-06	B/Hawaii/03/2014	State of Hawaii Department of Health	Centers for Disease Control and Prevention
EPI516654	HA	United States	2014-Feb-28	B/Ohio/01/2014	Ohio Department of Health Laboratories	Centers for Disease Control and Prevention
EPI516651	HA	United States	2014-Feb-24	B/Indiana/01/2014	Indiana State Department of Health Laboratories	Centers for Disease Control and Prevention
EPI516383	HA	Japan	2014-Jan-23	B/SHIZUOKA-C/7/2014	Shizuoka City Institute of Environmental Sciences and Public Health	National Institute of Infectious Diseases (NIID)	Takashita,Emi; Fujisaki,Seiichiro; Ejima,Miho; Odagiri,Takato
EPI516070	HA	Sweden	2014-Feb-26	B/Uppsala/4/2014		Swedish Institute for Infectious Disease Control
EPI515761	HA	United States	2014-Feb-05	B/Nebraska/03/2014	Nebraska Public Health Lab	Centers for Disease Control and Prevention
EPI515265	HA	Cote d'Ivoire	2013-Dec-03	B/Cote d'Ivoire/2091/2013	Pasteur Institut of Côte d'Ivoire	National Institute for Medical Research
EPI515259	HA	Spain	2014-Jan-21	B/Catalonia/2151450NS/2014	Barcelona, Facultad de Medicina	National Institute for Medical Research
EPI515237	HA	Germany	2014-Feb-10	B/Bayern/1/2014	Robert-Koch-Institute	National Institute for Medical Research
EPI509434	HA	Bangladesh	2013-Nov-10	B/Bangladesh/3008/2013	Institute of Epidemiology Disease Control and Research (IEDCR) & Bangladesh National Influenza Centre (NIC)	Centers for Disease Control and Prevention
EPI508425	HA	Senegal	2013-Nov-04	B/Niakhar/1790/2013	Institut Pasteur de Dakar	Centers for Disease Control and Prevention
EPI508387	HA	Senegal	2013-Oct-23	B/Niakhar/1733/2013	Institut Pasteur de Dakar	Centers for Disease Control and Prevention
EPI507157	HA	United States	2013-Jan-09	B/Texas/02/2013	Centers for Disease Control and Prevention	National Institute of Infectious Diseases (NIID)	Takashita,Emi; Fujisaki,Seiichiro; Itoh,Reiko; Miura,Mai; Ejima,Miho; Tashiro,Masato; Odagiri,Takato
EPI507143	HA	Nepal	2012-Jan-01	B/Nepal/183/2012	National Public Health Laboratory	National Institute of Infectious Diseases (NIID)	Takashita,Emi; Fujisaki,Seiichiro; Itoh,Reiko; Miura,Mai; Ejima,Miho; Tashiro,Masato; Odagiri,Takato
EPI504823	HA	United States	2013-Dec-29	B/Arkansas/01/2013	Arkansas Department of Health	Centers for Disease Control and Prevention
EPI504650	HA	Japan	2013-Dec-27	B/SAPPORO/33/2013	Sapporo City Institute of Public Health	National Institute of Infectious Diseases (NIID)	Takashita,Emi; Fujisaki,Seiichiro; Itoh,Reiko; Miura,Mai; Ejima,Miho; Tashiro,Masato; Odagiri,Takato
EPI504636	HA	Japan	2013-Dec-22	B/SAKAI/32/2013	Sakai City Institute of Public Health	National Institute of Infectious Diseases (NIID)	Takashita,Emi; Fujisaki,Seiichiro; Itoh,Reiko; Miura,Mai; Ejima,Miho; Tashiro,Masato; Odagiri,Takato
EPI504555	HA	Chile	2013-Dec-06	B/Santiago/80686/2013	Instituto de Salud Publica de Chile	Centers for Disease Control and Prevention
EPI503746	HA	Norway	2013-Dec-24	B/Norway/3309/2013		Norwegian Institute of Public Health	Dudman SG, Waalen K, Hungnes O
EPI503552	HA	United States	2013-Dec-22	B/Nevada/12/2013	Nevada State Health Laboratory	Centers for Disease Control and Prevention
EPI503029	HA	Australia	2011-May-14	B/Sydney/501/2011		Other Database Import	Wentworth,D.E.; Halpin,R.A.; Lin,X.; Zhou,B.; Bera,J.; Ransier,A.; Fedorova,N.; Tsitrin,T.; McLellan,M.; Stockwell,T.; Amedeo,P.; Appalla,L.; Bishop,B.; Edworthy,P.; Gupta,N.; Hoover,J.; Katzel,D.; Li,K.; Schobel,S.; Shrivastava,S.; Thovarai,V.; Wang,S.; Barr,I.; Dhanasekaran,V.; Deng,Y.M.; Hurt,A.; Komadina,N.; Smith,G.; Bao,Y.; Sanders,R.; Dernovoy,D.; Kiryutin,B.; Lipman,D.J.; Tatusova,T.
EPI502900	HA	Australia	2010-Aug-26	B/Sydney/202/2010		Other Database Import	Wentworth,D.E.; Halpin,R.A.; Lin,X.; Zhou,B.; Bera,J.; Ransier,A.; Fedorova,N.; Tsitrin,T.; McLellan,M.; Stockwell,T.; Amedeo,P.; Appalla,L.; Bishop,B.; Edworthy,P.; Gupta,N.; Hoover,J.; Katzel,D.; Li,K.; Schobel,S.; Shrivastava,S.; Thovarai,V.; Wang,S.; Barr,I.; Dhanasekaran,V.; Deng,Y.M.; Hurt,A.; Komadina,N.; Smith,G.; Bao,Y.; Sanders,R.; Dernovoy,D.; Kiryutin,B.; Lipman,D.J.; Tatusova,T.
EPI502860	HA	Australia	2008-Aug-06	B/Townsville/2/2008		Other Database Import	Wentworth,D.E.; Halpin,R.A.; Lin,X.; Zhou,B.; Bera,J.; Ransier,A.; Fedorova,N.; Tsitrin,T.; McLellan,M.; Stockwell,T.; Amedeo,P.; Appalla,L.; Bishop,B.; Edworthy,P.; Gupta,N.; Hoover,J.; Katzel,D.; Li,K.; Schobel,S.; Shrivastava,S.; Thovarai,V.; Wang,S.; Barr,I.; Dhanasekaran,V.; Deng,Y.M.; Hurt,A.; Komadina,N.; Smith,G.; Bao,Y.; Sanders,R.; Dernovoy,D.; Kiryutin,B.; Lipman,D.J.; Tatusova,T.
EPI502844	HA	Australia	2008-Jun-27	B/Sydney/57/2008		Other Database Import	Wentworth,D.E.; Halpin,R.A.; Lin,X.; Zhou,B.; Bera,J.; Ransier,A.; Fedorova,N.; Tsitrin,T.; McLellan,M.; Stockwell,T.; Amedeo,P.; Appalla,L.; Bishop,B.; Edworthy,P.; Gupta,N.; Hoover,J.; Katzel,D.; Li,K.; Schobel,S.; Shrivastava,S.; Thovarai,V.; Wang,S.; Barr,I.; Dhanasekaran,V.; Deng,Y.M.; Hurt,A.; Komadina,N.; Smith,G.; Bao,Y.; Sanders,R.; Dernovoy,D.; Kiryutin,B.; Lipman,D.J.; Tatusova,T.
EPI502811	HA	Australia	2006-Jun-06	B/Victoria/304/2006		Other Database Import	Wentworth,D.E.; Halpin,R.A.; Lin,X.; Zhou,B.; Bera,J.; Ransier,A.; Fedorova,N.; Tsitrin,T.; McLellan,M.; Stockwell,T.; Amedeo,P.; Appalla,L.; Bishop,B.; Edworthy,P.; Gupta,N.; Hoover,J.; Katzel,D.; Li,K.; Schobel,S.; Shrivastava,S.; Thovarai,V.; Wang,S.; Barr,I.; Dhanasekaran,V.; Deng,Y.M.; Hurt,A.; Komadina,N.; Smith,G.; Bao,Y.; Sanders,R.; Dernovoy,D.; Kiryutin,B.; Lipman,D.J.; Tatusova,T.
EPI500369	HA	Ireland	2013-Dec-04	B/Ireland/13M98449/2013	National Virus Reference Laboratory	National Institute for Medical Research
EPI499525	HA	United States	2013-May-23	B/Hawaii/3461/2013		Other Database Import	Connors,B.C.; Jones,S.L.; Bisaha,S.A.; Canas,L.C.; Baker,J.A.; Cosme,K.W.; Couch,M.R.; Garrett,C.M.; Weghorst,K.L.; Davis,M.G.; Hanson,J.F.; Yohannes,R.A.; Abshire,J.P.; DeMarcus,L.S.; Smith,J.P.; Fumia,K.F.; Zorich,S.C.; Macias,E.A.; Noe,J.C.; Sjoberg,P.A.
EPI499523	HA	United States	2013-May-23	B/Hawaii/3459/2013		Other Database Import	Connors,B.C.; Jones,S.L.; Bisaha,S.A.; Canas,L.C.; Baker,J.A.; Cosme,K.W.; Couch,M.R.; Garrett,C.M.; Weghorst,K.L.; Davis,M.G.; Hanson,J.F.; Yohannes,R.A.; Abshire,J.P.; DeMarcus,L.S.; Smith,J.P.; Fumia,K.F.; Zorich,S.C.; Macias,E.A.; Noe,J.C.; Sjoberg,P.A.
EPI499517	HA	United States	2013-Apr-29	B/New York/3453/2013		Other Database Import	Connors,B.C.; Jones,S.L.; Bisaha,S.A.; Canas,L.C.; Baker,J.A.; Cosme,K.W.; Couch,M.R.; Garrett,C.M.; Weghorst,K.L.; Davis,M.G.; Hanson,J.F.; Yohannes,R.A.; Abshire,J.P.; DeMarcus,L.S.; Smith,J.P.; Fumia,K.F.; Zorich,S.C.; Macias,E.A.; Noe,J.C.; Sjoberg,P.A.
EPI499255	HA	Canada	2013-Nov-28	B/Quebec/RV2389/2013	National Microbiology Laboratory, Health Canada	Centers for Disease Control and Prevention
EPI499217	HA	United States	2013-Dec-02	B/New Hampshire/05/2013	New Hampshire Public Health Laboratories	Centers for Disease Control and Prevention
EPI499080	HA	China	2013-Oct-17	B/Jiangxi-Xiji-Jizhou/1663/2013	WHO Chinese National Influenza Center	WHO Chinese National Influenza Center	Yu,Lan;Xiyan,Li;Xiang,Zhao;Yanhui,Cheng;minju,Tan;Weijuan,Huang;Dayan,Wang;Dexin,Li;Yuelong,Shu
EPI498741	HA	China	2013-Sep-02	B/Guangdong-Xiangzhou/11050/2013	WHO Chinese National Influenza Center	WHO Chinese National Influenza Center	Yu Lan,Xiyan Li,Xiang Zhao,Yanhui Cheng,minju Tan,Weijuan Huang,Dayan Wang,Dexin Li,Yuelong Shu
EPI498319	HA	Canada	2013-Oct-17	B/Ontario/RV2311/2013	National Microbiology Laboratory, Health Canada	Centers for Disease Control and Prevention
EPI498311	HA	Canada	2013-Oct-27	B/Manitoba/RV2317/2013	National Microbiology Laboratory, Health Canada	Centers for Disease Control and Prevention
EPI498307	HA	Canada	2013-Oct-15	B/Ontario/RV2310/2013	National Microbiology Laboratory, Health Canada	Centers for Disease Control and Prevention
EPI497547	HA	Japan	2013-Oct-15	B/AICHI/62/2013	Aichi Prefectural Institute of Public Health	National Institute of Infectious Diseases (NIID)	Takashita,Emi; Fujisaki,Seiichiro; Itoh,Reiko; Miura,Mai; Ejima,Miho; Tashiro,Masato; Odagiri,Takato
EPI493778	HA	United States	2013-Feb-13	B/Illinois/NHRC394050/2013		Other Database Import	Thammavong,H.; Balansay-Ames,M.; Hawksworth,A.; Myers,C.A.; Connors,B.; de Mattos,C.; Brice,G.
EPI493757	HA	United States	2013-Mar-12	B/Illinois/NHRC395531/2013		Other Database Import	Thammavong,H.; Balansay-Ames,M.; Hawksworth,A.; Myers,C.A.; Connors,B.; de Mattos,C.; Brice,G.
EPI491515	HA	New Zealand	2013-Sep-16	B/CHRISTCHURCH/517/2013	Canterbury Health Services	WHO Collaborating Centre for Reference and Research on Influenza	Deng,Y-M; Iannello,P; Spirason,N; Jelley,L; Lau,H; Komadina,N
EPI491488	HA	Australia	2013-Sep-23	B/SOUTH AUSTRALIA/79/2013	Institute of Medical and Veterinary Science (IMVS)	WHO Collaborating Centre for Reference and Research on Influenza	Deng,Y-M; Iannello,P; Spirason,N; Jelley,L; Lau,H; Komadina,N
EPI491455	HA	Australia	2013-Sep-11	B/TASMANIA/4/2013	Royal Hobart Hospital	WHO Collaborating Centre for Reference and Research on Influenza	Deng,Y-M; Iannello,P; Spirason,N; Jelley,L; Lau,H; Komadina,N
EPI491383	HA	New Zealand	2013-Jun-19	B/CHRISTCHURCH/3/2013	Institute of Environmental Science and Research	WHO Collaborating Centre for Reference and Research on Influenza	Deng,Y-M; Iannello,P; Spirason,N; Jelley,L; Lau,H; Komadina,N
EPI491181	HA	Australia	2013-Jul-29	B/SOUTH AUSTRALIA/20/2013	Institute of Medical and Veterinary Science (IMVS)	WHO Collaborating Centre for Reference and Research on Influenza	Deng,Y-M; Iannello,P; Spirason,N; Jelley,L; Lau,H; Komadina,N
EPI487402	HA	Sri Lanka	2013-Mar-28	B/Sri Lanka/9/2013	Medical Research Institute	WHO Collaborating Centre for Reference and Research on Influenza	Deng,Y-M; Iannello, P; Caldwell,N; Jelley,L; Lau,H; Komadina,N.
EPI487013	HA	Finland	2009-Jan-01	B/Finland/504/2009		Other Database Import
EPI484939	HA	New Zealand	2008-Jul-23	B/Christchurch/13/2008		Other Database Import	Wentworth,D.E.; Halpin,R.A.; Lin,X.; Zhou,B.; Bera,J.; Ransier,A.; Fedorova,N.; Tsitrin,T.; McLellan,M.; Stockwell,T.; Amedeo,P.; Appalla,L.; Bishop,B.; Edworthy,P.; Gupta,N.; Hoover,J.; Katzel,D.; Li,K.; Schobel,S.; Shrivastava,S.; Thovarai,V.; Wang,S.; Barr,I.; Dhanasekaran,V.; Deng,Y.M.; Hurt,A.; Komadina,N.; Smith,G.; Bao,Y.; Sanders,R.; Dernovoy,D.; Kiryutin,B.; Lipman,D.J.; Tatusova,T.
EPI484905	HA	Australia	2007-Aug-04	B/Victoria/801/2007		Other Database Import	Wentworth,D.E.; Halpin,R.A.; Lin,X.; Zhou,B.; Bera,J.; Ransier,A.; Fedorova,N.; Tsitrin,T.; McLellan,M.; Stockwell,T.; Amedeo,P.; Appalla,L.; Bishop,B.; Edworthy,P.; Gupta,N.; Hoover,J.; Katzel,D.; Li,K.; Schobel,S.; Shrivastava,S.; Thovarai,V.; Wang,S.; Barr,I.; Dhanasekaran,V.; Deng,Y.M.; Hurt,A.; Komadina,N.; Smith,G.; Bao,Y.; Sanders,R.; Dernovoy,D.; Kiryutin,B.; Lipman,D.J.; Tatusova,T.
EPI484875	HA	New Zealand	2004-Oct-12	B/Otago/03/2004		Other Database Import	Wentworth,D.E.; Halpin,R.A.; Lin,X.; Zhou,B.; Bera,J.; Ransier,A.; Fedorova,N.; Tsitrin,T.; McLellan,M.; Stockwell,T.; Amedeo,P.; Appalla,L.; Bishop,B.; Edworthy,P.; Gupta,N.; Hoover,J.; Katzel,D.; Li,K.; Schobel,S.; Shrivastava,S.; Thovarai,V.; Wang,S.; Barr,I.; Dhanasekaran,V.; Deng,Y.M.; Hurt,A.; Komadina,N.; Smith,G.; Bao,Y.; Sanders,R.; Dernovoy,D.; Kiryutin,B.; Lipman,D.J.; Tatusova,T.
EPI484869	HA	Australia	2004-Sep-10	B/Victoria/508/2004		Other Database Import	Wentworth,D.E.; Halpin,R.A.; Lin,X.; Zhou,B.; Bera,J.; Ransier,A.; Fedorova,N.; Tsitrin,T.; McLellan,M.; Stockwell,T.; Amedeo,P.; Appalla,L.; Bishop,B.; Edworthy,P.; Gupta,N.; Hoover,J.; Katzel,D.; Li,K.; Schobel,S.; Shrivastava,S.; Thovarai,V.; Wang,S.; Barr,I.; Dhanasekaran,V.; Deng,Y.M.; Hurt,A.; Komadina,N.; Smith,G.; Bao,Y.; Sanders,R.; Dernovoy,D.; Kiryutin,B.; Lipman,D.J.; Tatusova,T.
EPI484809	HA	New Zealand	2008-Aug-19	B/Auckland/131/2008		Other Database Import	Wentworth,D.E.; Halpin,R.A.; Lin,X.; Zhou,B.; Bera,J.; Ransier,A.; Fedorova,N.; Tsitrin,T.; McLellan,M.; Stockwell,T.; Amedeo,P.; Appalla,L.; Bishop,B.; Edworthy,P.; Gupta,N.; Hoover,J.; Katzel,D.; Li,K.; Schobel,S.; Shrivastava,S.; Thovarai,V.; Wang,S.; Barr,I.; Dhanasekaran,V.; Deng,Y.M.; Hurt,A.; Komadina,N.; Smith,G.; Bao,Y.; Sanders,R.; Dernovoy,D.; Kiryutin,B.; Lipman,D.J.; Tatusova,T.
EPI484052	HA	Australia	2008-Sep-08	B/Sydney/106/2008		Other Database Import	Wentworth,D.E.; Halpin,R.A.; Lin,X.; Zhou,B.; Bera,J.; Ransier,A.; Fedorova,N.; Tsitrin,T.; McLellan,M.; Stockwell,T.; Amedeo,P.; Appalla,L.; Bishop,B.; Edworthy,P.; Gupta,N.; Hoover,J.; Katzel,D.; Li,K.; Schobel,S.; Shrivastava,S.; Thovarai,V.; Wang,S.; Barr,I.; Dhanasekaran,V.; Deng,Y.M.; Hurt,A.; Komadina,N.; Smith,G.; Bao,Y.; Sanders,R.; Dernovoy,D.; Kiryutin,B.; Lipman,D.J.; Tatusova,T.
EPI484004	HA	New Zealand	2008-Aug-21	B/Auckland/136/2008		Other Database Import	Wentworth,D.E.; Halpin,R.A.; Lin,X.; Zhou,B.; Bera,J.; Ransier,A.; Fedorova,N.; Tsitrin,T.; McLellan,M.; Stockwell,T.; Amedeo,P.; Appalla,L.; Bishop,B.; Edworthy,P.; Gupta,N.; Hoover,J.; Katzel,D.; Li,K.; Schobel,S.; Shrivastava,S.; Thovarai,V.; Wang,S.; Barr,I.; Dhanasekaran,V.; Deng,Y.M.; Hurt,A.; Komadina,N.; Smith,G.; Bao,Y.; Sanders,R.; Dernovoy,D.; Kiryutin,B.; Lipman,D.J.; Tatusova,T.
EPI483868	HA	Australia	2008-Jul-23	B/Sydney/24/2008		Other Database Import	Wentworth,D.E.; Halpin,R.A.; Lin,X.; Zhou,B.; Bera,J.; Ransier,A.; Fedorova,N.; Tsitrin,T.; McLellan,M.; Stockwell,T.; Amedeo,P.; Appalla,L.; Bishop,B.; Edworthy,P.; Gupta,N.; Hoover,J.; Katzel,D.; Li,K.; Schobel,S.; Shrivastava,S.; Thovarai,V.; Wang,S.; Barr,I.; Dhanasekaran,V.; Deng,Y.M.; Hurt,A.; Komadina,N.; Smith,G.; Bao,Y.; Sanders,R.; Dernovoy,D.; Kiryutin,B.; Lipman,D.J.; Tatusova,T.
EPI483788	HA	Australia	2008-Jul-07	B/Sydney/61/2008		Other Database Import	Wentworth,D.E.; Halpin,R.A.; Lin,X.; Zhou,B.; Bera,J.; Ransier,A.; Fedorova,N.; Tsitrin,T.; McLellan,M.; Stockwell,T.; Amedeo,P.; Appalla,L.; Bishop,B.; Edworthy,P.; Gupta,N.; Hoover,J.; Katzel,D.; Li,K.; Schobel,S.; Shrivastava,S.; Thovarai,V.; Wang,S.; Barr,I.; Dhanasekaran,V.; Deng,Y.M.; Hurt,A.; Komadina,N.; Smith,G.; Bao,Y.; Sanders,R.; Dernovoy,D.; Kiryutin,B.; Lipman,D.J.; Tatusova,T.
EPI483780	HA	Australia	2008-Jul-02	B/Brisbane/22/2008		Other Database Import	Wentworth,D.E.; Halpin,R.A.; Lin,X.; Zhou,B.; Bera,J.; Ransier,A.; Fedorova,N.; Tsitrin,T.; McLellan,M.; Stockwell,T.; Amedeo,P.; Appalla,L.; Bishop,B.; Edworthy,P.; Gupta,N.; Hoover,J.; Katzel,D.; Li,K.; Schobel,S.; Shrivastava,S.; Thovarai,V.; Wang,S.; Barr,I.; Dhanasekaran,V.; Deng,Y.M.; Hurt,A.; Komadina,N.; Smith,G.; Bao,Y.; Sanders,R.; Dernovoy,D.; Kiryutin,B.; Lipman,D.J.; Tatusova,T.
EPI483708	HA	New Zealand	2008-May-13	B/Auckland/3/2008		Other Database Import	Wentworth,D.E.; Halpin,R.A.; Lin,X.; Zhou,B.; Bera,J.; Ransier,A.; Fedorova,N.; Tsitrin,T.; McLellan,M.; Stockwell,T.; Amedeo,P.; Appalla,L.; Bishop,B.; Edworthy,P.; Gupta,N.; Hoover,J.; Katzel,D.; Li,K.; Schobel,S.; Shrivastava,S.; Thovarai,V.; Wang,S.; Barr,I.; Dhanasekaran,V.; Deng,Y.M.; Hurt,A.; Komadina,N.; Smith,G.; Bao,Y.; Sanders,R.; Dernovoy,D.; Kiryutin,B.; Lipman,D.J.; Tatusova,T.
EPI483620	HA	New Zealand	2007-Dec-14	B/Waikato/1/2008		Other Database Import	Wentworth,D.E.; Halpin,R.A.; Lin,X.; Zhou,B.; Bera,J.; Ransier,A.; Fedorova,N.; Tsitrin,T.; McLellan,M.; Stockwell,T.; Amedeo,P.; Appalla,L.; Bishop,B.; Edworthy,P.; Gupta,N.; Hoover,J.; Katzel,D.; Li,K.; Schobel,S.; Shrivastava,S.; Thovarai,V.; Wang,S.; Barr,I.; Dhanasekaran,V.; Deng,Y.M.; Hurt,A.; Komadina,N.; Smith,G.; Bao,Y.; Sanders,R.; Dernovoy,D.; Kiryutin,B.; Lipman,D.J.; Tatusova,T.
EPI483588	HA	Australia	2007-Oct-29	B/Brisbane/25/2007		Other Database Import	Wentworth,D.E.; Halpin,R.A.; Lin,X.; Zhou,B.; Bera,J.; Ransier,A.; Fedorova,N.; Tsitrin,T.; McLellan,M.; Stockwell,T.; Amedeo,P.; Appalla,L.; Bishop,B.; Edworthy,P.; Gupta,N.; Hoover,J.; Katzel,D.; Li,K.; Schobel,S.; Shrivastava,S.; Thovarai,V.; Wang,S.; Barr,I.; Dhanasekaran,V.; Deng,Y.M.; Hurt,A.; Komadina,N.; Smith,G.; Bao,Y.; Sanders,R.; Dernovoy,D.; Kiryutin,B.; Lipman,D.J.; Tatusova,T.
EPI483508	HA	Australia	2007-Oct-01	B/Brisbane/23/2007		Other Database Import	Wentworth,D.E.; Halpin,R.A.; Lin,X.; Zhou,B.; Bera,J.; Ransier,A.; Fedorova,N.; Tsitrin,T.; McLellan,M.; Stockwell,T.; Amedeo,P.; Appalla,L.; Bishop,B.; Edworthy,P.; Gupta,N.; Hoover,J.; Katzel,D.; Li,K.; Schobel,S.; Shrivastava,S.; Thovarai,V.; Wang,S.; Barr,I.; Dhanasekaran,V.; Deng,Y.M.; Hurt,A.; Komadina,N.; Smith,G.; Bao,Y.; Sanders,R.; Dernovoy,D.; Kiryutin,B.; Lipman,D.J.; Tatusova,T.
EPI483428	HA	New Zealand	2007-Sep-10	B/Wellington/12/2007		Other Database Import	Wentworth,D.E.; Halpin,R.A.; Lin,X.; Zhou,B.; Bera,J.; Ransier,A.; Fedorova,N.; Tsitrin,T.; McLellan,M.; Stockwell,T.; Amedeo,P.; Appalla,L.; Bishop,B.; Edworthy,P.; Gupta,N.; Hoover,J.; Katzel,D.; Li,K.; Schobel,S.; Shrivastava,S.; Thovarai,V.; Wang,S.; Barr,I.; Dhanasekaran,V.; Deng,Y.M.; Hurt,A.; Komadina,N.; Smith,G.; Bao,Y.; Sanders,R.; Dernovoy,D.; Kiryutin,B.; Lipman,D.J.; Tatusova,T.
EPI483364	HA	New Zealand	2007-Aug-27	B/Wellington/10/2007		Other Database Import	Wentworth,D.E.; Halpin,R.A.; Lin,X.; Zhou,B.; Bera,J.; Ransier,A.; Fedorova,N.; Tsitrin,T.; McLellan,M.; Stockwell,T.; Amedeo,P.; Appalla,L.; Bishop,B.; Edworthy,P.; Gupta,N.; Hoover,J.; Katzel,D.; Li,K.; Schobel,S.; Shrivastava,S.; Thovarai,V.; Wang,S.; Barr,I.; Dhanasekaran,V.; Deng,Y.M.; Hurt,A.; Komadina,N.; Smith,G.; Bao,Y.; Sanders,R.; Dernovoy,D.; Kiryutin,B.; Lipman,D.J.; Tatusova,T.
EPI483300	HA	Australia	2007-Aug-13	B/Victoria/805/2007		Other Database Import	Wentworth,D.E.; Halpin,R.A.; Lin,X.; Zhou,B.; Bera,J.; Ransier,A.; Fedorova,N.; Tsitrin,T.; McLellan,M.; Stockwell,T.; Amedeo,P.; Appalla,L.; Bishop,B.; Edworthy,P.; Gupta,N.; Hoover,J.; Katzel,D.; Li,K.; Schobel,S.; Shrivastava,S.; Thovarai,V.; Wang,S.; Barr,I.; Dhanasekaran,V.; Deng,Y.M.; Hurt,A.; Komadina,N.; Smith,G.; Bao,Y.; Sanders,R.; Dernovoy,D.; Kiryutin,B.; Lipman,D.J.; Tatusova,T.
EPI483196	HA	Australia	2007-May-23	B/Sydney/500/2007		Other Database Import	Wentworth,D.E.; Halpin,R.A.; Lin,X.; Zhou,B.; Bera,J.; Ransier,A.; Fedorova,N.; Tsitrin,T.; McLellan,M.; Stockwell,T.; Amedeo,P.; Appalla,L.; Bishop,B.; Edworthy,P.; Gupta,N.; Hoover,J.; Katzel,D.; Li,K.; Schobel,S.; Shrivastava,S.; Thovarai,V.; Wang,S.; Barr,I.; Dhanasekaran,V.; Deng,Y.M.; Hurt,A.; Komadina,N.; Smith,G.; Bao,Y.; Sanders,R.; Dernovoy,D.; Kiryutin,B.; Lipman,D.J.; Tatusova,T.
EPI482996	HA	Australia	2005-Sep-30	B/Brisbane/100/2005		Other Database Import	Wentworth,D.E.; Halpin,R.A.; Lin,X.; Zhou,B.; Bera,J.; Ransier,A.; Fedorova,N.; Tsitrin,T.; McLellan,M.; Stockwell,T.; Amedeo,P.; Appalla,L.; Bishop,B.; Edworthy,P.; Gupta,N.; Hoover,J.; Katzel,D.; Li,K.; Schobel,S.; Shrivastava,S.; Thovarai,V.; Wang,S.; Barr,I.; Dhanasekaran,V.; Deng,Y.M.; Hurt,A.; Komadina,N.; Smith,G.; Bao,Y.; Sanders,R.; Dernovoy,D.; Kiryutin,B.; Lipman,D.J.; Tatusova,T.
EPI482924	HA	Australia	2005-Aug-29	B/Victoria/125/2005		Other Database Import	Wentworth,D.E.; Halpin,R.A.; Lin,X.; Zhou,B.; Bera,J.; Ransier,A.; Fedorova,N.; Tsitrin,T.; McLellan,M.; Stockwell,T.; Amedeo,P.; Appalla,L.; Bishop,B.; Edworthy,P.; Gupta,N.; Hoover,J.; Katzel,D.; Li,K.; Schobel,S.; Shrivastava,S.; Thovarai,V.; Wang,S.; Barr,I.; Dhanasekaran,V.; Deng,Y.M.; Hurt,A.; Komadina,N.; Smith,G.; Bao,Y.; Sanders,R.; Dernovoy,D.; Kiryutin,B.; Lipman,D.J.; Tatusova,T.
EPI482831	HA	Burkina Faso	2013-Jul-16	B/Burkina Faso/1080/2013	IRSS	Centers for Disease Control and Prevention
EPI482686	HA	Australia	2005-Jul-27	B/Brisbane/17/2005		Other Database Import	Wentworth,D.E.; Halpin,R.A.; Lin,X.; Zhou,B.; Bera,J.; Ransier,A.; Fedorova,N.; Tsitrin,T.; McLellan,M.; Stockwell,T.; Amedeo,P.; Appalla,L.; Bishop,B.; Edworthy,P.; Gupta,N.; Hoover,J.; Katzel,D.; Li,K.; Schobel,S.; Shrivastava,S.; Thovarai,V.; Wang,S.; Barr,I.; Dhanasekaran,V.; Deng,Y.M.; Hurt,A.; Komadina,N.; Smith,G.; Bao,Y.; Sanders,R.; Dernovoy,D.; Kiryutin,B.; Lipman,D.J.; Tatusova,T.
EPI482614	HA	New Zealand	2005-Jun-23	B/Auckland/107/2005		Other Database Import	Wentworth,D.E.; Halpin,R.A.; Lin,X.; Zhou,B.; Bera,J.; Ransier,A.; Fedorova,N.; Tsitrin,T.; McLellan,M.; Stockwell,T.; Amedeo,P.; Appalla,L.; Bishop,B.; Edworthy,P.; Gupta,N.; Hoover,J.; Katzel,D.; Li,K.; Schobel,S.; Shrivastava,S.; Thovarai,V.; Wang,S.; Barr,I.; Dhanasekaran,V.; Deng,Y.M.; Hurt,A.; Komadina,N.; Smith,G.; Bao,Y.; Sanders,R.; Dernovoy,D.; Kiryutin,B.; Lipman,D.J.; Tatusova,T.
EPI482567	HA	Australia	2005-Jun-03	B/Victoria/507/2005		Other Database Import	Wentworth,D.E.; Halpin,R.A.; Lin,X.; Zhou,B.; Bera,J.; Ransier,A.; Fedorova,N.; Tsitrin,T.; McLellan,M.; Stockwell,T.; Amedeo,P.; Appalla,L.; Bishop,B.; Edworthy,P.; Gupta,N.; Hoover,J.; Katzel,D.; Li,K.; Schobel,S.; Shrivastava,S.; Thovarai,V.; Wang,S.; Barr,I.; Dhanasekaran,V.; Deng,Y.M.; Hurt,A.; Komadina,N.; Smith,G.; Bao,Y.; Sanders,R.; Dernovoy,D.; Kiryutin,B.; Lipman,D.J.; Tatusova,T.
EPI482047	HA	Australia	2004-Sep-11	B/Brisbane/4/2004		Other Database Import	Wentworth,D.E.; Halpin,R.A.; Lin,X.; Zhou,B.; Bera,J.; Ransier,A.; Fedorova,N.; Tsitrin,T.; McLellan,M.; Stockwell,T.; Amedeo,P.; Appalla,L.; Bishop,B.; Edworthy,P.; Gupta,N.; Hoover,J.; Katzel,D.; Li,K.; Schobel,S.; Shrivastava,S.; Thovarai,V.; Wang,S.; Barr,I.; Dhanasekaran,V.; Deng,Y.M.; Hurt,A.; Komadina,N.; Smith,G.; Bao,Y.; Sanders,R.; Dernovoy,D.; Kiryutin,B.; Lipman,D.J.; Tatusova,T.
EPI481960	HA	New Zealand	2004-Aug-19	B/Waikato/01/2004		Other Database Import	Wentworth,D.E.; Halpin,R.A.; Lin,X.; Zhou,B.; Bera,J.; Ransier,A.; Fedorova,N.; Tsitrin,T.; McLellan,M.; Stockwell,T.; Amedeo,P.; Appalla,L.; Bishop,B.; Edworthy,P.; Gupta,N.; Hoover,J.; Katzel,D.; Li,K.; Schobel,S.; Shrivastava,S.; Thovarai,V.; Wang,S.; Barr,I.; Dhanasekaran,V.; Deng,Y.M.; Hurt,A.; Komadina,N.; Smith,G.; Bao,Y.; Sanders,R.; Dernovoy,D.; Kiryutin,B.; Lipman,D.J.; Tatusova,T.
EPI481736	HA	New Zealand	2011-Sep-22	B/Auckland/71/2011		Other Database Import	Wentworth,D.E.; Halpin,R.A.; Lin,X.; Zhou,B.; Bera,J.; Ransier,A.; Fedorova,N.; Tsitrin,T.; McLellan,M.; Stockwell,T.; Amedeo,P.; Appalla,L.; Bishop,B.; Edworthy,P.; Gupta,N.; Hoover,J.; Katzel,D.; Li,K.; Schobel,S.; Shrivastava,S.; Thovarai,V.; Wang,S.; Barr,I.; Dhanasekaran,V.; Deng,Y.M.; Hurt,A.; Komadina,N.; Smith,G.; Bao,Y.; Sanders,R.; Dernovoy,D.; Kiryutin,B.; Lipman,D.J.; Tatusova,T.
EPI481713	HA	Australia	2011-Sep-11	B/Sydney/515/2011		Other Database Import	Wentworth,D.E.; Halpin,R.A.; Lin,X.; Zhou,B.; Bera,J.; Ransier,A.; Fedorova,N.; Tsitrin,T.; McLellan,M.; Stockwell,T.; Amedeo,P.; Appalla,L.; Bishop,B.; Edworthy,P.; Gupta,N.; Hoover,J.; Katzel,D.; Li,K.; Schobel,S.; Shrivastava,S.; Thovarai,V.; Wang,S.; Barr,I.; Dhanasekaran,V.; Deng,Y.M.; Hurt,A.; Komadina,N.; Smith,G.; Bao,Y.; Sanders,R.; Dernovoy,D.; Kiryutin,B.; Lipman,D.J.; Tatusova,T.
EPI481545	HA	Australia	2011-Aug-01	B/Victoria/531/2011		Other Database Import	Wentworth,D.E.; Halpin,R.A.; Lin,X.; Zhou,B.; Bera,J.; Ransier,A.; Fedorova,N.; Tsitrin,T.; McLellan,M.; Stockwell,T.; Amedeo,P.; Appalla,L.; Bishop,B.; Edworthy,P.; Gupta,N.; Hoover,J.; Katzel,D.; Li,K.; Schobel,S.; Shrivastava,S.; Thovarai,V.; Wang,S.; Barr,I.; Dhanasekaran,V.; Deng,Y.M.; Hurt,A.; Komadina,N.; Smith,G.; Bao,Y.; Sanders,R.; Dernovoy,D.; Kiryutin,B.; Lipman,D.J.; Tatusova,T.
EPI481441	HA	Australia	2011-Jul-16	B/Sydney/201/2011		Other Database Import	Wentworth,D.E.; Halpin,R.A.; Lin,X.; Zhou,B.; Bera,J.; Ransier,A.; Fedorova,N.; Tsitrin,T.; McLellan,M.; Stockwell,T.; Amedeo,P.; Appalla,L.; Bishop,B.; Edworthy,P.; Gupta,N.; Hoover,J.; Katzel,D.; Li,K.; Schobel,S.; Shrivastava,S.; Thovarai,V.; Wang,S.; Barr,I.; Dhanasekaran,V.; Deng,Y.M.; Hurt,A.; Komadina,N.; Smith,G.; Bao,Y.; Sanders,R.; Dernovoy,D.; Kiryutin,B.; Lipman,D.J.; Tatusova,T.
EPI481409	HA	Australia	2011-Jul-09	B/Townsville/8/2011		Other Database Import	Wentworth,D.E.; Halpin,R.A.; Lin,X.; Zhou,B.; Bera,J.; Ransier,A.; Fedorova,N.; Tsitrin,T.; McLellan,M.; Stockwell,T.; Amedeo,P.; Appalla,L.; Bishop,B.; Edworthy,P.; Gupta,N.; Hoover,J.; Katzel,D.; Li,K.; Schobel,S.; Shrivastava,S.; Thovarai,V.; Wang,S.; Barr,I.; Dhanasekaran,V.; Deng,Y.M.; Hurt,A.; Komadina,N.; Smith,G.; Bao,Y.; Sanders,R.; Dernovoy,D.; Kiryutin,B.; Lipman,D.J.; Tatusova,T.
EPI481386	HA	New Zealand	2011-Jul-06	B/Auckland/27/2011		Other Database Import	Wentworth,D.E.; Halpin,R.A.; Lin,X.; Zhou,B.; Bera,J.; Ransier,A.; Fedorova,N.; Tsitrin,T.; McLellan,M.; Stockwell,T.; Amedeo,P.; Appalla,L.; Bishop,B.; Edworthy,P.; Gupta,N.; Hoover,J.; Katzel,D.; Li,K.; Schobel,S.; Shrivastava,S.; Thovarai,V.; Wang,S.; Barr,I.; Dhanasekaran,V.; Deng,Y.M.; Hurt,A.; Komadina,N.; Smith,G.; Bao,Y.; Sanders,R.; Dernovoy,D.; Kiryutin,B.; Lipman,D.J.; Tatusova,T.
EPI481033	HA	Australia	2010-Oct-15	B/Sydney/6/2010		Other Database Import	Wentworth,D.E.; Halpin,R.A.; Lin,X.; Zhou,B.; Bera,J.; Ransier,A.; Fedorova,N.; Tsitrin,T.; McLellan,M.; Stockwell,T.; Amedeo,P.; Appalla,L.; Bishop,B.; Edworthy,P.; Gupta,N.; Hoover,J.; Katzel,D.; Li,K.; Schobel,S.; Shrivastava,S.; Thovarai,V.; Wang,S.; Barr,I.; Dhanasekaran,V.; Deng,Y.M.; Hurt,A.; Komadina,N.; Smith,G.; Bao,Y.; Sanders,R.; Dernovoy,D.; Kiryutin,B.; Lipman,D.J.; Tatusova,T.
EPI480946	HA	Australia	2010-Sep-27	B/Brisbane/16/2010		Other Database Import	Wentworth,D.E.; Halpin,R.A.; Lin,X.; Zhou,B.; Bera,J.; Ransier,A.; Fedorova,N.; Tsitrin,T.; McLellan,M.; Stockwell,T.; Amedeo,P.; Appalla,L.; Bishop,B.; Edworthy,P.; Gupta,N.; Hoover,J.; Katzel,D.; Li,K.; Schobel,S.; Shrivastava,S.; Thovarai,V.; Wang,S.; Barr,I.; Dhanasekaran,V.; Deng,Y.M.; Hurt,A.; Komadina,N.; Smith,G.; Bao,Y.; Sanders,R.; Dernovoy,D.; Kiryutin,B.; Lipman,D.J.; Tatusova,T.
EPI480874	HA	Australia	2010-Sep-08	B/Brisbane/9/2010		Other Database Import	Wentworth,D.E.; Halpin,R.A.; Lin,X.; Zhou,B.; Bera,J.; Ransier,A.; Fedorova,N.; Tsitrin,T.; McLellan,M.; Stockwell,T.; Amedeo,P.; Appalla,L.; Bishop,B.; Edworthy,P.; Gupta,N.; Hoover,J.; Katzel,D.; Li,K.; Schobel,S.; Shrivastava,S.; Thovarai,V.; Wang,S.; Barr,I.; Dhanasekaran,V.; Deng,Y.M.; Hurt,A.; Komadina,N.; Smith,G.; Bao,Y.; Sanders,R.; Dernovoy,D.; Kiryutin,B.; Lipman,D.J.; Tatusova,T.
EPI480826	HA	Australia	2010-Aug-11	B/Brisbane/2/2010		Other Database Import	Wentworth,D.E.; Halpin,R.A.; Lin,X.; Zhou,B.; Bera,J.; Ransier,A.; Fedorova,N.; Tsitrin,T.; McLellan,M.; Stockwell,T.; Amedeo,P.; Appalla,L.; Bishop,B.; Edworthy,P.; Gupta,N.; Hoover,J.; Katzel,D.; Li,K.; Schobel,S.; Shrivastava,S.; Thovarai,V.; Wang,S.; Barr,I.; Dhanasekaran,V.; Deng,Y.M.; Hurt,A.; Komadina,N.; Smith,G.; Bao,Y.; Sanders,R.; Dernovoy,D.; Kiryutin,B.; Lipman,D.J.; Tatusova,T.
EPI480818	HA	Australia	2010-Aug-11	B/Brisbane/1/2010		Other Database Import	Wentworth,D.E.; Halpin,R.A.; Lin,X.; Zhou,B.; Bera,J.; Ransier,A.; Fedorova,N.; Tsitrin,T.; McLellan,M.; Stockwell,T.; Amedeo,P.; Appalla,L.; Bishop,B.; Edworthy,P.; Gupta,N.; Hoover,J.; Katzel,D.; Li,K.; Schobel,S.; Shrivastava,S.; Thovarai,V.; Wang,S.; Barr,I.; Dhanasekaran,V.; Deng,Y.M.; Hurt,A.; Komadina,N.; Smith,G.; Bao,Y.; Sanders,R.; Dernovoy,D.; Kiryutin,B.; Lipman,D.J.; Tatusova,T.
EPI480810	HA	New Zealand	2010-Jul-31	B/Christchurch/1001/2010		Other Database Import	Wentworth,D.E.; Halpin,R.A.; Lin,X.; Zhou,B.; Bera,J.; Ransier,A.; Fedorova,N.; Tsitrin,T.; McLellan,M.; Stockwell,T.; Amedeo,P.; Appalla,L.; Bishop,B.; Edworthy,P.; Gupta,N.; Hoover,J.; Katzel,D.; Li,K.; Schobel,S.; Shrivastava,S.; Thovarai,V.; Wang,S.; Barr,I.; Dhanasekaran,V.; Deng,Y.M.; Hurt,A.; Komadina,N.; Smith,G.; Bao,Y.; Sanders,R.; Dernovoy,D.; Kiryutin,B.; Lipman,D.J.; Tatusova,T.
EPI480802	HA	Australia	2009-Mar-31	B/Sydney/2/2009		Other Database Import	Wentworth,D.E.; Halpin,R.A.; Lin,X.; Zhou,B.; Bera,J.; Ransier,A.; Fedorova,N.; Tsitrin,T.; McLellan,M.; Stockwell,T.; Amedeo,P.; Appalla,L.; Bishop,B.; Edworthy,P.; Gupta,N.; Hoover,J.; Katzel,D.; Li,K.; Schobel,S.; Shrivastava,S.; Thovarai,V.; Wang,S.; Barr,I.; Dhanasekaran,V.; Deng,Y.M.; Hurt,A.; Komadina,N.; Smith,G.; Bao,Y.; Sanders,R.; Dernovoy,D.; Kiryutin,B.; Lipman,D.J.; Tatusova,T.
EPI480706	HA	New Zealand	2008-Aug-31	B/Auckland/84/2008		Other Database Import	Wentworth,D.E.; Halpin,R.A.; Lin,X.; Zhou,B.; Bera,J.; Ransier,A.; Fedorova,N.; Tsitrin,T.; McLellan,M.; Stockwell,T.; Amedeo,P.; Appalla,L.; Bishop,B.; Edworthy,P.; Gupta,N.; Hoover,J.; Katzel,D.; Li,K.; Schobel,S.; Shrivastava,S.; Thovarai,V.; Wang,S.; Barr,I.; Dhanasekaran,V.; Deng,Y.M.; Hurt,A.; Komadina,N.; Smith,G.; Bao,Y.; Sanders,R.; Dernovoy,D.; Kiryutin,B.; Lipman,D.J.; Tatusova,T.
EPI480666	HA	Australia	2008-Aug-25	B/Sydney/538/2008		Other Database Import	Wentworth,D.E.; Halpin,R.A.; Lin,X.; Zhou,B.; Bera,J.; Ransier,A.; Fedorova,N.; Tsitrin,T.; McLellan,M.; Stockwell,T.; Amedeo,P.; Appalla,L.; Bishop,B.; Edworthy,P.; Gupta,N.; Hoover,J.; Katzel,D.; Li,K.; Schobel,S.; Shrivastava,S.; Thovarai,V.; Wang,S.; Barr,I.; Dhanasekaran,V.; Deng,Y.M.; Hurt,A.; Komadina,N.; Smith,G.; Bao,Y.; Sanders,R.; Dernovoy,D.; Kiryutin,B.; Lipman,D.J.; Tatusova,T.
EPI480530	HA	Australia	2008-Aug-06	B/Sydney/521/2008		Other Database Import	Wentworth,D.E.; Halpin,R.A.; Lin,X.; Zhou,B.; Bera,J.; Ransier,A.; Fedorova,N.; Tsitrin,T.; McLellan,M.; Stockwell,T.; Amedeo,P.; Appalla,L.; Bishop,B.; Edworthy,P.; Gupta,N.; Hoover,J.; Katzel,D.; Li,K.; Schobel,S.; Shrivastava,S.; Thovarai,V.; Wang,S.; Barr,I.; Dhanasekaran,V.; Deng,Y.M.; Hurt,A.; Komadina,N.; Smith,G.; Bao,Y.; Sanders,R.; Dernovoy,D.; Kiryutin,B.; Lipman,D.J.; Tatusova,T.
EPI480441	HA	Australia	2008-Jul-25	B/Brisbane/54/2008		Other Database Import	Wentworth,D.E.; Halpin,R.A.; Lin,X.; Zhou,B.; Bera,J.; Ransier,A.; Fedorova,N.; Tsitrin,T.; McLellan,M.; Stockwell,T.; Amedeo,P.; Appalla,L.; Bishop,B.; Edworthy,P.; Gupta,N.; Hoover,J.; Katzel,D.; Li,K.; Schobel,S.; Shrivastava,S.; Thovarai,V.; Wang,S.; Barr,I.; Dhanasekaran,V.; Deng,Y.M.; Hurt,A.; Komadina,N.; Smith,G.; Bao,Y.; Sanders,R.; Dernovoy,D.; Kiryutin,B.; Lipman,D.J.; Tatusova,T.
EPI480338	HA	Australia	2007-Aug-30	B/Sydney/505/2007		Other Database Import	Wentworth,D.E.; Halpin,R.A.; Lin,X.; Zhou,B.; Bera,J.; Ransier,A.; Fedorova,N.; Tsitrin,T.; McLellan,M.; Stockwell,T.; Amedeo,P.; Appalla,L.; Bishop,B.; Edworthy,P.; Gupta,N.; Hoover,J.; Katzel,D.; Li,K.; Schobel,S.; Shrivastava,S.; Thovarai,V.; Wang,S.; Barr,I.; Dhanasekaran,V.; Deng,Y.M.; Hurt,A.; Komadina,N.; Smith,G.; Bao,Y.; Sanders,R.; Dernovoy,D.; Kiryutin,B.; Lipman,D.J.; Tatusova,T.
EPI480258	HA	Australia	2007-Jun-30	B/Brisbane/7/2006		Other Database Import	Wentworth,D.E.; Halpin,R.A.; Lin,X.; Zhou,B.; Bera,J.; Ransier,A.; Fedorova,N.; Tsitrin,T.; McLellan,M.; Stockwell,T.; Amedeo,P.; Appalla,L.; Bishop,B.; Edworthy,P.; Gupta,N.; Hoover,J.; Katzel,D.; Li,K.; Schobel,S.; Shrivastava,S.; Thovarai,V.; Wang,S.; Barr,I.; Dhanasekaran,V.; Deng,Y.M.; Hurt,A.; Komadina,N.; Smith,G.; Bao,Y.; Sanders,R.; Dernovoy,D.; Kiryutin,B.; Lipman,D.J.; Tatusova,T.
EPI480199	HA	Australia	2006-Sep-26	B/Brisbane/90/2006		Other Database Import	Wentworth,D.E.; Halpin,R.A.; Lin,X.; Zhou,B.; Bera,J.; Ransier,A.; Fedorova,N.; Tsitrin,T.; McLellan,M.; Stockwell,T.; Amedeo,P.; Appalla,L.; Bishop,B.; Edworthy,P.; Gupta,N.; Hoover,J.; Katzel,D.; Li,K.; Schobel,S.; Shrivastava,S.; Thovarai,V.; Wang,S.; Barr,I.; Dhanasekaran,V.; Deng,Y.M.; Hurt,A.; Komadina,N.; Smith,G.; Bao,Y.; Sanders,R.; Dernovoy,D.; Kiryutin,B.; Lipman,D.J.; Tatusova,T.
EPI480112	HA	Australia	2006-Aug-22	B/Sydney/205/2006		Other Database Import	Wentworth,D.E.; Halpin,R.A.; Lin,X.; Zhou,B.; Bera,J.; Ransier,A.; Fedorova,N.; Tsitrin,T.; McLellan,M.; Stockwell,T.; Amedeo,P.; Appalla,L.; Bishop,B.; Edworthy,P.; Gupta,N.; Hoover,J.; Katzel,D.; Li,K.; Schobel,S.; Shrivastava,S.; Thovarai,V.; Wang,S.; Barr,I.; Dhanasekaran,V.; Deng,Y.M.; Hurt,A.; Komadina,N.; Smith,G.; Bao,Y.; Sanders,R.; Dernovoy,D.; Kiryutin,B.; Lipman,D.J.; Tatusova,T.
EPI479970	HA	Australia	2006-Jul-12	B/Victoria/330/2006		Other Database Import	Wentworth,D.E.; Halpin,R.A.; Lin,X.; Zhou,B.; Bera,J.; Ransier,A.; Fedorova,N.; Tsitrin,T.; McLellan,M.; Stockwell,T.; Amedeo,P.; Appalla,L.; Bishop,B.; Edworthy,P.; Gupta,N.; Hoover,J.; Katzel,D.; Li,K.; Schobel,S.; Shrivastava,S.; Thovarai,V.; Wang,S.; Barr,I.; Dhanasekaran,V.; Deng,Y.M.; Hurt,A.; Komadina,N.; Smith,G.; Bao,Y.; Sanders,R.; Dernovoy,D.; Kiryutin,B.; Lipman,D.J.; Tatusova,T.
EPI479850	HA	Australia	2006-Jun-15	B/Victoria/104/2006		Other Database Import	Wentworth,D.E.; Halpin,R.A.; Lin,X.; Zhou,B.; Bera,J.; Ransier,A.; Fedorova,N.; Tsitrin,T.; McLellan,M.; Stockwell,T.; Amedeo,P.; Appalla,L.; Bishop,B.; Edworthy,P.; Gupta,N.; Hoover,J.; Katzel,D.; Li,K.; Schobel,S.; Shrivastava,S.; Thovarai,V.; Wang,S.; Barr,I.; Dhanasekaran,V.; Deng,Y.M.; Hurt,A.; Komadina,N.; Smith,G.; Bao,Y.; Sanders,R.; Dernovoy,D.; Kiryutin,B.; Lipman,D.J.; Tatusova,T.
EPI479826	HA	Australia	2006-Jun-13	B/Victoria/307/2006		Other Database Import	Wentworth,D.E.; Halpin,R.A.; Lin,X.; Zhou,B.; Bera,J.; Ransier,A.; Fedorova,N.; Tsitrin,T.; McLellan,M.; Stockwell,T.; Amedeo,P.; Appalla,L.; Bishop,B.; Edworthy,P.; Gupta,N.; Hoover,J.; Katzel,D.; Li,K.; Schobel,S.; Shrivastava,S.; Thovarai,V.; Wang,S.; Barr,I.; Dhanasekaran,V.; Deng,Y.M.; Hurt,A.; Komadina,N.; Smith,G.; Bao,Y.; Sanders,R.; Dernovoy,D.; Kiryutin,B.; Lipman,D.J.; Tatusova,T.
EPI479760	HA	Australia	2006-May-07	B/Victoria/501/2006		Other Database Import	Wentworth,D.E.; Halpin,R.A.; Lin,X.; Zhou,B.; Bera,J.; Ransier,A.; Fedorova,N.; Tsitrin,T.; McLellan,M.; Stockwell,T.; Amedeo,P.; Appalla,L.; Bishop,B.; Edworthy,P.; Gupta,N.; Hoover,J.; Katzel,D.; Li,K.; Schobel,S.; Shrivastava,S.; Thovarai,V.; Wang,S.; Barr,I.; Dhanasekaran,V.; Deng,Y.M.; Hurt,A.; Komadina,N.; Smith,G.; Bao,Y.; Sanders,R.; Dernovoy,D.; Kiryutin,B.; Lipman,D.J.; Tatusova,T.
EPI479752	HA	New Zealand	2006-Mar-08	B/Christchurch/4/2006		Other Database Import	Wentworth,D.E.; Halpin,R.A.; Lin,X.; Zhou,B.; Bera,J.; Ransier,A.; Fedorova,N.; Tsitrin,T.; McLellan,M.; Stockwell,T.; Amedeo,P.; Appalla,L.; Bishop,B.; Edworthy,P.; Gupta,N.; Hoover,J.; Katzel,D.; Li,K.; Schobel,S.; Shrivastava,S.; Thovarai,V.; Wang,S.; Barr,I.; Dhanasekaran,V.; Deng,Y.M.; Hurt,A.; Komadina,N.; Smith,G.; Bao,Y.; Sanders,R.; Dernovoy,D.; Kiryutin,B.; Lipman,D.J.; Tatusova,T.
EPI479744	HA	Australia	2006-Feb-27	B/Brisbane/1/2006		Other Database Import	Wentworth,D.E.; Halpin,R.A.; Lin,X.; Zhou,B.; Bera,J.; Ransier,A.; Fedorova,N.; Tsitrin,T.; McLellan,M.; Stockwell,T.; Amedeo,P.; Appalla,L.; Bishop,B.; Edworthy,P.; Gupta,N.; Hoover,J.; Katzel,D.; Li,K.; Schobel,S.; Shrivastava,S.; Thovarai,V.; Wang,S.; Barr,I.; Dhanasekaran,V.; Deng,Y.M.; Hurt,A.; Komadina,N.; Smith,G.; Bao,Y.; Sanders,R.; Dernovoy,D.; Kiryutin,B.; Lipman,D.J.; Tatusova,T.
EPI479656	HA	Australia	2005-Sep-12	B/Brisbane/97/2005		Other Database Import	Wentworth,D.E.; Halpin,R.A.; Lin,X.; Zhou,B.; Bera,J.; Ransier,A.; Fedorova,N.; Tsitrin,T.; McLellan,M.; Stockwell,T.; Amedeo,P.; Appalla,L.; Bishop,B.; Edworthy,P.; Gupta,N.; Hoover,J.; Katzel,D.; Li,K.; Schobel,S.; Shrivastava,S.; Thovarai,V.; Wang,S.; Barr,I.; Dhanasekaran,V.; Deng,Y.M.; Hurt,A.; Komadina,N.; Smith,G.; Bao,Y.; Sanders,R.; Dernovoy,D.; Kiryutin,B.; Lipman,D.J.; Tatusova,T.
EPI479608	HA	Australia	2005-Sep-03	B/Victoria/527/2005		Other Database Import	Wentworth,D.E.; Halpin,R.A.; Lin,X.; Zhou,B.; Bera,J.; Ransier,A.; Fedorova,N.; Tsitrin,T.; McLellan,M.; Stockwell,T.; Amedeo,P.; Appalla,L.; Bishop,B.; Edworthy,P.; Gupta,N.; Hoover,J.; Katzel,D.; Li,K.; Schobel,S.; Shrivastava,S.; Thovarai,V.; Wang,S.; Barr,I.; Dhanasekaran,V.; Deng,Y.M.; Hurt,A.; Komadina,N.; Smith,G.; Bao,Y.; Sanders,R.; Dernovoy,D.; Kiryutin,B.; Lipman,D.J.; Tatusova,T.
EPI479352	HA	Australia	2005-Jul-14	B/Sydney/25/2005		Other Database Import	Wentworth,D.E.; Halpin,R.A.; Lin,X.; Zhou,B.; Bera,J.; Ransier,A.; Fedorova,N.; Tsitrin,T.; McLellan,M.; Stockwell,T.; Amedeo,P.; Appalla,L.; Bishop,B.; Edworthy,P.; Gupta,N.; Hoover,J.; Katzel,D.; Li,K.; Schobel,S.; Shrivastava,S.; Thovarai,V.; Wang,S.; Barr,I.; Dhanasekaran,V.; Deng,Y.M.; Hurt,A.; Komadina,N.; Smith,G.; Bao,Y.; Sanders,R.; Dernovoy,D.; Kiryutin,B.; Lipman,D.J.; Tatusova,T.
EPI479312	HA	Australia	2005-Jul-08	B/Victoria/518/2005		Other Database Import	Wentworth,D.E.; Halpin,R.A.; Lin,X.; Zhou,B.; Bera,J.; Ransier,A.; Fedorova,N.; Tsitrin,T.; McLellan,M.; Stockwell,T.; Amedeo,P.; Appalla,L.; Bishop,B.; Edworthy,P.; Gupta,N.; Hoover,J.; Katzel,D.; Li,K.; Schobel,S.; Shrivastava,S.; Thovarai,V.; Wang,S.; Barr,I.; Dhanasekaran,V.; Deng,Y.M.; Hurt,A.; Komadina,N.; Smith,G.; Bao,Y.; Sanders,R.; Dernovoy,D.; Kiryutin,B.; Lipman,D.J.; Tatusova,T.
EPI479256	HA	Australia	2005-Jun-29	B/Victoria/515/2005		Other Database Import	Wentworth,D.E.; Halpin,R.A.; Lin,X.; Zhou,B.; Bera,J.; Ransier,A.; Fedorova,N.; Tsitrin,T.; McLellan,M.; Stockwell,T.; Amedeo,P.; Appalla,L.; Bishop,B.; Edworthy,P.; Gupta,N.; Hoover,J.; Katzel,D.; Li,K.; Schobel,S.; Shrivastava,S.; Thovarai,V.; Wang,S.; Barr,I.; Dhanasekaran,V.; Deng,Y.M.; Hurt,A.; Komadina,N.; Smith,G.; Bao,Y.; Sanders,R.; Dernovoy,D.; Kiryutin,B.; Lipman,D.J.; Tatusova,T.
EPI479224	HA	New Zealand	2005-Jun-24	B/Waikato/105/2005		Other Database Import	Wentworth,D.E.; Halpin,R.A.; Lin,X.; Zhou,B.; Bera,J.; Ransier,A.; Fedorova,N.; Tsitrin,T.; McLellan,M.; Stockwell,T.; Amedeo,P.; Appalla,L.; Bishop,B.; Edworthy,P.; Gupta,N.; Hoover,J.; Katzel,D.; Li,K.; Schobel,S.; Shrivastava,S.; Thovarai,V.; Wang,S.; Barr,I.; Dhanasekaran,V.; Deng,Y.M.; Hurt,A.; Komadina,N.; Smith,G.; Bao,Y.; Sanders,R.; Dernovoy,D.; Kiryutin,B.; Lipman,D.J.; Tatusova,T.
EPI479040	HA	New Zealand	2002-Oct-02	B/Auckland/36/2002		Other Database Import	Wentworth,D.E.; Halpin,R.A.; Lin,X.; Zhou,B.; Bera,J.; Ransier,A.; Fedorova,N.; Tsitrin,T.; McLellan,M.; Stockwell,T.; Amedeo,P.; Appalla,L.; Bishop,B.; Edworthy,P.; Gupta,N.; Hoover,J.; Katzel,D.; Li,K.; Schobel,S.; Shrivastava,S.; Thovarai,V.; Wang,S.; Barr,I.; Dhanasekaran,V.; Deng,Y.M.; Hurt,A.; Komadina,N.; Smith,G.; Bao,Y.; Sanders,R.; Dernovoy,D.; Kiryutin,B.; Lipman,D.J.; Tatusova,T.
EPI479000	HA	New Zealand	2002-Aug-28	B/Christchurch/119/2002		Other Database Import	Wentworth,D.E.; Halpin,R.A.; Lin,X.; Zhou,B.; Bera,J.; Ransier,A.; Fedorova,N.; Tsitrin,T.; McLellan,M.; Stockwell,T.; Amedeo,P.; Appalla,L.; Bishop,B.; Edworthy,P.; Gupta,N.; Hoover,J.; Katzel,D.; Li,K.; Schobel,S.; Shrivastava,S.; Thovarai,V.; Wang,S.; Barr,I.; Dhanasekaran,V.; Deng,Y.M.; Hurt,A.; Komadina,N.; Smith,G.; Bao,Y.; Sanders,R.; Dernovoy,D.; Kiryutin,B.; Lipman,D.J.; Tatusova,T.
EPI478864	HA	Australia	2002-Jul-19	B/Townsville/5/2002		Other Database Import	Wentworth,D.E.; Halpin,R.A.; Lin,X.; Zhou,B.; Bera,J.; Ransier,A.; Fedorova,N.; Tsitrin,T.; McLellan,M.; Stockwell,T.; Amedeo,P.; Appalla,L.; Bishop,B.; Edworthy,P.; Gupta,N.; Hoover,J.; Katzel,D.; Li,K.; Schobel,S.; Shrivastava,S.; Thovarai,V.; Wang,S.; Barr,I.; Dhanasekaran,V.; Deng,Y.M.; Hurt,A.; Komadina,N.; Smith,G.; Bao,Y.; Sanders,R.; Dernovoy,D.; Kiryutin,B.; Lipman,D.J.; Tatusova,T.
EPI478816	HA	Australia	2002-Jul-15	B/Victoria/160/2002		Other Database Import	Wentworth,D.E.; Halpin,R.A.; Lin,X.; Zhou,B.; Bera,J.; Ransier,A.; Fedorova,N.; Tsitrin,T.; McLellan,M.; Stockwell,T.; Amedeo,P.; Appalla,L.; Bishop,B.; Edworthy,P.; Gupta,N.; Hoover,J.; Katzel,D.; Li,K.; Schobel,S.; Shrivastava,S.; Thovarai,V.; Wang,S.; Barr,I.; Dhanasekaran,V.; Deng,Y.M.; Hurt,A.; Komadina,N.; Smith,G.; Bao,Y.; Sanders,R.; Dernovoy,D.; Kiryutin,B.; Lipman,D.J.; Tatusova,T.
EPI478784	HA	Australia	2002-Jul-10	B/Victoria/159/2002		Other Database Import	Wentworth,D.E.; Halpin,R.A.; Lin,X.; Zhou,B.; Bera,J.; Ransier,A.; Fedorova,N.; Tsitrin,T.; McLellan,M.; Stockwell,T.; Amedeo,P.; Appalla,L.; Bishop,B.; Edworthy,P.; Gupta,N.; Hoover,J.; Katzel,D.; Li,K.; Schobel,S.; Shrivastava,S.; Thovarai,V.; Wang,S.; Barr,I.; Dhanasekaran,V.; Deng,Y.M.; Hurt,A.; Komadina,N.; Smith,G.; Bao,Y.; Sanders,R.; Dernovoy,D.; Kiryutin,B.; Lipman,D.J.; Tatusova,T.
EPI478768	HA	Australia	2002-Jul-09	B/Victoria/158/2002		Other Database Import	Wentworth,D.E.; Halpin,R.A.; Lin,X.; Zhou,B.; Bera,J.; Ransier,A.; Fedorova,N.; Tsitrin,T.; McLellan,M.; Stockwell,T.; Amedeo,P.; Appalla,L.; Bishop,B.; Edworthy,P.; Gupta,N.; Hoover,J.; Katzel,D.; Li,K.; Schobel,S.; Shrivastava,S.; Thovarai,V.; Wang,S.; Barr,I.; Dhanasekaran,V.; Deng,Y.M.; Hurt,A.; Komadina,N.; Smith,G.; Bao,Y.; Sanders,R.; Dernovoy,D.; Kiryutin,B.; Lipman,D.J.; Tatusova,T.
EPI478352	HA	Australia	2002-May-16	B/Sydney/203/2002		Other Database Import	Wentworth,D.E.; Halpin,R.A.; Lin,X.; Zhou,B.; Bera,J.; Ransier,A.; Fedorova,N.; Tsitrin,T.; McLellan,M.; Stockwell,T.; Amedeo,P.; Appalla,L.; Bishop,B.; Edworthy,P.; Gupta,N.; Hoover,J.; Katzel,D.; Li,K.; Schobel,S.; Shrivastava,S.; Thovarai,V.; Wang,S.; Barr,I.; Dhanasekaran,V.; Deng,Y.M.; Hurt,A.; Komadina,N.; Smith,G.; Bao,Y.; Sanders,R.; Dernovoy,D.; Kiryutin,B.; Lipman,D.J.; Tatusova,T.
EPI478285	HA	Australia	2002-Feb-19	B/Sydney/1/2002		Other Database Import	Wentworth,D.E.; Halpin,R.A.; Lin,X.; Zhou,B.; Bera,J.; Ransier,A.; Fedorova,N.; Tsitrin,T.; McLellan,M.; Stockwell,T.; Amedeo,P.; Appalla,L.; Bishop,B.; Edworthy,P.; Gupta,N.; Hoover,J.; Katzel,D.; Li,K.; Schobel,S.; Shrivastava,S.; Thovarai,V.; Wang,S.; Barr,I.; Dhanasekaran,V.; Deng,Y.M.; Hurt,A.; Komadina,N.; Smith,G.; Bao,Y.; Sanders,R.; Dernovoy,D.; Kiryutin,B.; Lipman,D.J.; Tatusova,T.
EPI478192	HA	Australia	2007-Aug-14	B/Brisbane/12/2007		Other Database Import	Wentworth,D.E.; Halpin,R.A.; Lin,X.; Zhou,B.; Bera,J.; Ransier,A.; Fedorova,N.; Tsitrin,T.; McLellan,M.; Stockwell,T.; Amedeo,P.; Appalla,L.; Bishop,B.; Edworthy,P.; Gupta,N.; Hoover,J.; Katzel,D.; Li,K.; Schobel,S.; Shrivastava,S.; Thovarai,V.; Wang,S.; Barr,I.; Dhanasekaran,V.; Deng,Y.M.; Hurt,A.; Komadina,N.; Smith,G.; Bao,Y.; Sanders,R.; Dernovoy,D.; Kiryutin,B.; Lipman,D.J.; Tatusova,T.
EPI478009	HA	Australia	2004-Jun-24	B/Victoria/501/2004		Other Database Import	Wentworth,D.E.; Halpin,R.A.; Lin,X.; Zhou,B.; Bera,J.; Ransier,A.; Fedorova,N.; Tsitrin,T.; McLellan,M.; Stockwell,T.; Amedeo,P.; Appalla,L.; Bishop,B.; Edworthy,P.; Gupta,N.; Hoover,J.; Katzel,D.; Li,K.; Schobel,S.; Shrivastava,S.; Thovarai,V.; Wang,S.; Barr,I.; Dhanasekaran,V.; Deng,Y.M.; Hurt,A.; Komadina,N.; Smith,G.; Bao,Y.; Sanders,R.; Dernovoy,D.; Kiryutin,B.; Lipman,D.J.; Tatusova,T.
EPI477997	HA	Australia	2011-Oct-02	B/Brisbane/111/2011		Other Database Import	Wentworth,D.E.; Halpin,R.A.; Lin,X.; Zhou,B.; Bera,J.; Ransier,A.; Fedorova,N.; Tsitrin,T.; McLellan,M.; Stockwell,T.; Amedeo,P.; Appalla,L.; Bishop,B.; Edworthy,P.; Gupta,N.; Hoover,J.; Katzel,D.; Li,K.; Schobel,S.; Shrivastava,S.; Thovarai,V.; Wang,S.; Barr,I.; Dhanasekaran,V.; Deng,Y.M.; Hurt,A.; Komadina,N.; Smith,G.; Bao,Y.; Sanders,R.; Dernovoy,D.; Kiryutin,B.; Lipman,D.J.; Tatusova,T.
EPI477962	HA	Australia	2011-Jun-20	B/Sydney/22/2011		Other Database Import	Wentworth,D.E.; Halpin,R.A.; Lin,X.; Zhou,B.; Bera,J.; Ransier,A.; Fedorova,N.; Tsitrin,T.; McLellan,M.; Stockwell,T.; Amedeo,P.; Appalla,L.; Bishop,B.; Edworthy,P.; Gupta,N.; Hoover,J.; Katzel,D.; Li,K.; Schobel,S.; Shrivastava,S.; Thovarai,V.; Wang,S.; Barr,I.; Dhanasekaran,V.; Deng,Y.M.; Hurt,A.; Komadina,N.; Smith,G.; Bao,Y.; Sanders,R.; Dernovoy,D.; Kiryutin,B.; Lipman,D.J.; Tatusova,T.
EPI477840	HA	Australia	2008-Aug-18	B/Victoria/509/2008		Other Database Import	Wentworth,D.E.; Halpin,R.A.; Lin,X.; Zhou,B.; Bera,J.; Ransier,A.; Fedorova,N.; Tsitrin,T.; McLellan,M.; Stockwell,T.; Amedeo,P.; Appalla,L.; Bishop,B.; Edworthy,P.; Gupta,N.; Hoover,J.; Katzel,D.; Li,K.; Schobel,S.; Shrivastava,S.; Thovarai,V.; Wang,S.; Barr,I.; Dhanasekaran,V.; Deng,Y.M.; Hurt,A.; Komadina,N.; Smith,G.; Bao,Y.; Sanders,R.; Dernovoy,D.; Kiryutin,B.; Lipman,D.J.; Tatusova,T.
EPI477710	HA	Australia	2005-Aug-30	B/Sydney/29/2005		Other Database Import	Wentworth,D.E.; Halpin,R.A.; Lin,X.; Zhou,B.; Bera,J.; Ransier,A.; Fedorova,N.; Tsitrin,T.; McLellan,M.; Stockwell,T.; Amedeo,P.; Appalla,L.; Bishop,B.; Edworthy,P.; Gupta,N.; Hoover,J.; Katzel,D.; Li,K.; Schobel,S.; Shrivastava,S.; Thovarai,V.; Wang,S.; Barr,I.; Dhanasekaran,V.; Deng,Y.M.; Hurt,A.; Komadina,N.; Smith,G.; Bao,Y.; Sanders,R.; Dernovoy,D.; Kiryutin,B.; Lipman,D.J.; Tatusova,T.
EPI477654	HA	Australia	2013-Jan-25	B/NEWCASTLE/5/2013		WHO Collaborating Centre for Reference and Research on Influenza
EPI477389	HA	France	2013-Mar-05	B/Pays de Loire/1222/2013	Institut Pasteur	National Institute for Medical Research
EPI477369	HA	Lithuania	2013-Feb-25	B/Lithuania/6530/2013	Lithuanian AIDS Center Laboratory	National Institute for Medical Research
EPI477351	HA	Cameroon	2013-Jun-12	B/Cameroon/13V-3209/2013	Centre Pasteur du Cameroun	National Institute for Medical Research
EPI473780	HA	Brazil	2013-Aug-16	B/Brazil/4861/2013	Instituto Adolfo Lutz	Centers for Disease Control and Prevention
EPI468512	HA	Lao, People's Democratic Republic	2013-Apr-29	B/Laos/I341/2013	Ministry of Health Laos	National Institute of Infectious Diseases (NIID)	Fujisaki,Seiichiro; Itoh,Reiko; Miura,Mai; Tashiro,Masato; Odagiri,Takato
EPI468095	HA	Chile	2013-Jul-15	B/Castro/50476/2013	Instituto de Salud Publica de Chile	Centers for Disease Control and Prevention
EPI468072	HA	Poland	2013-Mar-12	B/Poland/6/2013	National Institute of Public Health - National Institute of Hygiene	National Institute for Medical Research
EPI468048	HA	Jordan	2013-Apr-01	B/Jordan/30244/2013	Laboratory Directorate	National Institute for Medical Research
EPI468042	HA	Jordan	2013-Mar-11	B/Jordan/30186/2013	Laboratory Directorate	National Institute for Medical Research
EPI468038	HA	Jordan	2013-Mar-16	B/Jordan/20308/2013	Laboratory Directorate	National Institute for Medical Research
EPI467183	HA	Russian Federation	2013-Mar-22	B/Tomsk/36/2013	Ivanovsky Research Institute of Virology RAMS	National Institute for Medical Research
EPI467159	HA	Norway	2013-Apr-08	B/Norway/2161/2013	WHO National Influenza Centre	National Institute for Medical Research
EPI467108	HA	Austria	2013-May-13	B/Austria/735346/2013	University of Vienna	National Institute for Medical Research
EPI467104	HA	Austria	2013-Mar-21	B/Austria/726751/2013	University of Vienna	National Institute for Medical Research
EPI466189	HA	Australia	2013-Jul-07	B/VICTORIA/522/2013	Monash Medical Centre	WHO Collaborating Centre for Reference and Research on Influenza	Deng,Y-M., Iannello,P., Caldwell,N., Lau, H.,Komadina,N.
EPI465918	HA	Hong Kong (SAR)	2013-Apr-05	B/Hong Kong/74/2013	Government Virus Unit	Centers for Disease Control and Prevention
EPI465915	HA	Thailand	2013-Jun-18	B/Song Khla/1598/2013	WHO National Influenza Centre, National Institute of Medical Research (NIMR)	Centers for Disease Control and Prevention
EPI465912	HA	Vietnam	2013-May-01	B/Vietnam/3071/2013	National Institute of Hygiene and Epidemiology	Centers for Disease Control and Prevention
EPI465886	HA	France	2013-Feb-21	B/Paris/1168/2013	Institut Pasteur	Institut Pasteur	D,BRIAND;V,ENOUF;E,GAULT
EPI465354	HA	Japan	1973-Jan-01	B/Yamagata/1/73		National Institute of Infectious Diseases (NIID)
EPI465224	HA	Japan	2013-May-08	B/SAPPORO/24/2013	Sapporo City Institute of Public Health	National Institute of Infectious Diseases (NIID)	Fujisaki,Seiichiro; Itoh,Reiko; Miura,Mai; Tashiro,Masato; Odagiri,Takato
EPI464968	HA	Romania	2013-Mar-26	B/Iasi/138319/2013		Cantacuzino Institute	Necula, G.; Ustea, L.; Oprea, M.; Dinu, S.; Lupulescu, E.
EPI464783	HA	Slovakia	2013-Feb-25	B/Trnava/636/2013	National Public Health Institute of Slovakia	National Institute for Medical Research
EPI464777	HA	Sweden	2013-Jan-06	B/Stockholm/2/2013	Swedish Institute for Infectious Disease Control	National Institute for Medical Research
EPI464737	HA	Hong Kong (SAR)	2013-Jan-24	B/Hong Kong/20/2013	Government Virus Unit	National Institute for Medical Research
EPI464723	HA	Slovakia	2013-Mar-20	B/Bratislava/911/2013	National Public Health Institute of Slovakia	National Institute for Medical Research
EPI464392	HA	Indonesia	2013-Mar-11	B/Indonesia/Nihrd-Buas704/2013	Ministry of Health, NIHRD	Centers for Disease Control and Prevention
EPI463628	HA	Vietnam	2012-Apr-19	B/Vietnam/VP12-48/2012	Pasteur Institute, Influenza Laboratory	National Institute of Infectious Diseases (NIID)	Fujisaki,Seiichiro; Itoh,Reiko; Miura,Mai; Tashiro,Masato; Odagiri,Takato
EPI462186	HA	United States	2013-Apr-12	B/Texas/3394/2013		Other Database Import	Connors,B.C.; Jones,S.L.; Sanow,A.D.; Bisaha,S.A.; Canas,L.C.; Baker,J.A.; Cosme,K.W.; Couch,M.R.; Garrett,C.M.; Weghorst,K.L.; Davis,M.G.; Hanson,J.F.; Yohannes,R.A.; Abshire,J.P.; DeMarcus,L.S.; LLoyd,L.V.; Seidel,A.K.; Smith,J.P.; Fumia,K.F.; Zorich,S.C.; Macias,E.A.; Noe,J.C.; Sjoberg,P.A.
EPI462177	HA	Japan	2013-Apr-02	B/Japan/3385/2013		Other Database Import	Connors,B.C.; Jones,S.L.; Sanow,A.D.; Bisaha,S.A.; Canas,L.C.; Baker,J.A.; Cosme,K.W.; Couch,M.R.; Garrett,C.M.; Weghorst,K.L.; Davis,M.G.; Hanson,J.F.; Yohannes,R.A.; Abshire,J.P.; DeMarcus,L.S.; LLoyd,L.V.; Seidel,A.K.; Smith,J.P.; Fumia,K.F.; Zorich,S.C.; Macias,E.A.; Noe,J.C.; Sjoberg,P.A.
EPI462159	HA	United States	2013-Mar-19	B/District of Columbia/3367/2013		Other Database Import	Connors,B.C.; Jones,S.L.; Sanow,A.D.; Bisaha,S.A.; Canas,L.C.; Baker,J.A.; Cosme,K.W.; Couch,M.R.; Garrett,C.M.; Weghorst,K.L.; Davis,M.G.; Hanson,J.F.; Yohannes,R.A.; Abshire,J.P.; DeMarcus,L.S.; LLoyd,L.V.; Seidel,A.K.; Smith,J.P.; Fumia,K.F.; Zorich,S.C.; Macias,E.A.; Noe,J.C.; Sjoberg,P.A.
EPI462145	HA	United States	2013-Mar-15	B/Dictrict of Columbia/3353/2013		Other Database Import	Connors,B.C.; Jones,S.L.; Sanow,A.D.; Bisaha,S.A.; Canas,L.C.; Baker,J.A.; Cosme,K.W.; Couch,M.R.; Garrett,C.M.; Weghorst,K.L.; Davis,M.G.; Hanson,J.F.; Yohannes,R.A.; Abshire,J.P.; DeMarcus,L.S.; LLoyd,L.V.; Seidel,A.K.; Smith,J.P.; Fumia,K.F.; Zorich,S.C.; Macias,E.A.; Noe,J.C.; Sjoberg,P.A.
EPI462144	HA	United States	2013-Mar-15	B/Florida/3352/2013		Other Database Import	Connors,B.C.; Jones,S.L.; Sanow,A.D.; Bisaha,S.A.; Canas,L.C.; Baker,J.A.; Cosme,K.W.; Couch,M.R.; Garrett,C.M.; Weghorst,K.L.; Davis,M.G.; Hanson,J.F.; Yohannes,R.A.; Abshire,J.P.; DeMarcus,L.S.; LLoyd,L.V.; Seidel,A.K.; Smith,J.P.; Fumia,K.F.; Zorich,S.C.; Macias,E.A.; Noe,J.C.; Sjoberg,P.A.
EPI462137	HA	United States	2013-Mar-15	B/Alabama/3345/2013		Other Database Import	Connors,B.C.; Jones,S.L.; Sanow,A.D.; Bisaha,S.A.; Canas,L.C.; Baker,J.A.; Cosme,K.W.; Couch,M.R.; Garrett,C.M.; Weghorst,K.L.; Davis,M.G.; Hanson,J.F.; Yohannes,R.A.; Abshire,J.P.; DeMarcus,L.S.; LLoyd,L.V.; Seidel,A.K.; Smith,J.P.; Fumia,K.F.; Zorich,S.C.; Macias,E.A.; Noe,J.C.; Sjoberg,P.A.
EPI462136	HA	United States	2013-Mar-14	B/Virginia/3344/2013		Other Database Import	Connors,B.C.; Jones,S.L.; Sanow,A.D.; Bisaha,S.A.; Canas,L.C.; Baker,J.A.; Cosme,K.W.; Couch,M.R.; Garrett,C.M.; Weghorst,K.L.; Davis,M.G.; Hanson,J.F.; Yohannes,R.A.; Abshire,J.P.; DeMarcus,L.S.; LLoyd,L.V.; Seidel,A.K.; Smith,J.P.; Fumia,K.F.; Zorich,S.C.; Macias,E.A.; Noe,J.C.; Sjoberg,P.A.
EPI464381	HA	Russian Federation	2011-Feb-20	B/Tomsk/12/2011		Other Database Import	Sobolev,I.A.; Kurskaya,O.G.; Durymanov,A.G.; Ilyicheva,T.N.; Ivanova,E.V.; Ivanova,L.K.; Shestopalov,A.M.
EPI460640	HA	Romania	2013-Apr-08	B/Vaslui/139688/2013	Cantacuzino Institute	National Institute for Medical Research
EPI460145	HA	United States	2013-Apr-08	B/Indiana/04/2013	Indiana State Department of Health Laboratories	Centers for Disease Control and Prevention
EPI460073	HA	Brazil	2013-Jan-10	B/Mato Grosso/4794/2013		Other Database Import	Borborema,S.E.T.; Santos,K.C.O.; Silva,D.B.B.; Paiva,T.M.; Santos,C.L.S.
EPI459729	HA	United States	2013-May-05	B/Alaska/05/2013	Alaska State Virology Lab	Centers for Disease Control and Prevention
EPI459713	HA	United States	2013-May-06	B/Maryland/03/2013	Maryland Department of Health and Mental Hygiene	Centers for Disease Control and Prevention
EPI459707	HA	United States	2013-May-08	B/New Jersey/07/2013	New Jersey Department of Health & Senior Services	Centers for Disease Control and Prevention
EPI457583	HA	United States	2013-Jan-19	B/California/04/2013	California Department of Health Services	Centers for Disease Control and Prevention
EPI453240	HA	Spain	2013-Feb-06	B/Catalonia/2074200NS/2013	Hospital Clínic	Hospital Clínic de Barcelona	Mosquera, MM.; Isanta, R.; Marcos, MA.; Vila, J.
EPI452256	HA	Chile	2013-Apr-09	B/Santiago/23499/2013	Instituto de Salud Publica de Chile	Centers for Disease Control and Prevention
EPI450719	HA	Kazakhstan	2013-Jan-13	B/Almaty/2845/2013	National Reference Laboratory	National Institute for Medical Research
EPI450717	HA	Russian Federation	2012-Nov-22	B/Moscow/93/2012	Ivanovsky Research Institute of Virology RAMS	National Institute for Medical Research
EPI450703	HA	Kazakhstan	2013-Jan-21	B/Karaganda/2914/2013	National Reference Laboratory	National Institute for Medical Research
EPI450335	HA	Thailand	2012-Dec-18	B/CHIANG RAI/3518/2012	WHO National Influenza Centre, National Institute of Medical Research (NIMR)	WHO Collaborating Centre for Reference and Research on Influenza	Deng,Y-M., Iannello,P.,Caldwell,N., Jelley,L.,Komadina,N.
EPI450056	HA	Morocco	2013-Feb-18	B/CASABLANCA/247/2013	Institut National d Hygiene, Ministere de la sante sante	National Institute of Hygien	Hassan Ihazmade,Amal Barakat
EPI447104	HA	United States	2013-Mar-17	B/Indiana/02/2013	Indiana State Department of Health Laboratories	Centers for Disease Control and Prevention
EPI447002	HA	Cambodia	2011-Oct-26	B/Cambodia/V1103320/2011		Other Database Import	Buchy,P.
EPI447001	HA	Cambodia	2011-Oct-10	B/Cambodia/V1012330/2011		Other Database Import	Buchy,P.
EPI446994	HA	Cambodia	2011-Jun-09	B/Cambodia/V0615332/2011		Other Database Import	Buchy,P.
EPI446654	HA	United States	2012-Dec-22	B/Texas/3303/2012		Other Database Import	Connors,B.C.; Jones,S.L.; Sanow,A.D.; Bisaha,S.A.; Canas,L.C.; Baker,J.A.; Cosme,K.W.; Couch,M.R.; Garrett,C.M.; Weghorst,K.L.; Davis,M.G.; Hanson,J.F.; Yohannes,R.A.; Abshire,J.P.; DeMarcus,L.S.; LLoyd,L.V.; Seidel,A.K.; Smith,J.P.; Macintosh,V.H.; Fumia,K.F.; Zorich,S.C.; Macias,E.A.; Noe,J.C.; Sjoberg,P.A.
EPI446649	HA	United States	2013-Jan-09	B/Oklahoma/3298/2013		Other Database Import	Connors,B.C.; Jones,S.L.; Sanow,A.D.; Bisaha,S.A.; Canas,L.C.; Baker,J.A.; Cosme,K.W.; Couch,M.R.; Garrett,C.M.; Weghorst,K.L.; Davis,M.G.; Hanson,J.F.; Yohannes,R.A.; Abshire,J.P.; DeMarcus,L.S.; LLoyd,L.V.; Seidel,A.K.; Smith,J.P.; Macintosh,V.H.; Fumia,K.F.; Zorich,S.C.; Macias,E.A.; Noe,J.C.; Sjoberg,P.A.
EPI446648	HA	United States	2013-Jan-18	B/New York/3297/2013		Other Database Import	Connors,B.C.; Jones,S.L.; Sanow,A.D.; Bisaha,S.A.; Canas,L.C.; Baker,J.A.; Cosme,K.W.; Couch,M.R.; Garrett,C.M.; Weghorst,K.L.; Davis,M.G.; Hanson,J.F.; Yohannes,R.A.; Abshire,J.P.; DeMarcus,L.S.; LLoyd,L.V.; Seidel,A.K.; Smith,J.P.; Macintosh,V.H.; Fumia,K.F.; Zorich,S.C.; Macias,E.A.; Noe,J.C.; Sjoberg,P.A.
EPI446637	HA	United States	2012-Dec-19	B/Nebraska/3286/2012		Other Database Import	Connors,B.C.; Jones,S.L.; Sanow,A.D.; Bisaha,S.A.; Canas,L.C.; Baker,J.A.; Cosme,K.W.; Couch,M.R.; Garrett,C.M.; Weghorst,K.L.; Davis,M.G.; Hanson,J.F.; Yohannes,R.A.; Abshire,J.P.; DeMarcus,L.S.; LLoyd,L.V.; Seidel,A.K.; Smith,J.P.; Macintosh,V.H.; Fumia,K.F.; Zorich,S.C.; Macias,E.A.; Noe,J.C.; Sjoberg,P.A.
EPI446625	HA	United States	2013-Jan-22	B/Georgia/3280/2013		Other Database Import	Connors,B.C.; Jones,S.L.; Sanow,A.D.; Bisaha,S.A.; Canas,L.C.; Baker,J.A.; Cosme,K.W.; Couch,M.R.; Garrett,C.M.; Weghorst,K.L.; Davis,M.G.; Hanson,J.F.; Yohannes,R.A.; Abshire,J.P.; DeMarcus,L.S.; LLoyd,L.V.; Seidel,A.K.; Smith,J.P.; Macintosh,V.H.; Fumia,K.F.; Zorich,S.C.; Macias,E.A.; Noe,J.C.; Sjoberg,P.A.
EPI446623	HA	United States	2013-Jan-15	B/Florida/3278/2013		Other Database Import	Connors,B.C.; Jones,S.L.; Sanow,A.D.; Bisaha,S.A.; Canas,L.C.; Baker,J.A.; Cosme,K.W.; Couch,M.R.; Garrett,C.M.; Weghorst,K.L.; Davis,M.G.; Hanson,J.F.; Yohannes,R.A.; Abshire,J.P.; DeMarcus,L.S.; LLoyd,L.V.; Seidel,A.K.; Smith,J.P.; Macintosh,V.H.; Fumia,K.F.; Zorich,S.C.; Macias,E.A.; Noe,J.C.; Sjoberg,P.A.
EPI446618	HA	United States	2013-Jan-14	B/Colorado/3273/2013		Other Database Import	Connors,B.C.; Jones,S.L.; Sanow,A.D.; Bisaha,S.A.; Canas,L.C.; Baker,J.A.; Cosme,K.W.; Couch,M.R.; Garrett,C.M.; Weghorst,K.L.; Davis,M.G.; Hanson,J.F.; Yohannes,R.A.; Abshire,J.P.; DeMarcus,L.S.; LLoyd,L.V.; Seidel,A.K.; Smith,J.P.; Macintosh,V.H.; Fumia,K.F.; Zorich,S.C.; Macias,E.A.; Noe,J.C.; Sjoberg,P.A.
EPI445951	HA	Ireland	2012-Nov-19	B/Ireland/87829/2012	National Virus Reference Laboratory	National Institute for Medical Research
EPI445929	HA	Spain	2013-Jan-07	B/Catalonia/2066914NS/2013	Barcelona, Facultad de Medicina	National Institute for Medical Research
EPI443770	HA	United States	2013-Mar-24	B/Tennessee/01/2013	Tennessee Department of Health Laboratory-Nashville	Centers for Disease Control and Prevention
EPI443690	HA	United States	2013-Jan-09	B/Texas/02/2013	Texas Department of State Health Services-Laboratory Services	Centers for Disease Control and Prevention
EPI442837	HA	United States	2013-Mar-06	B/Montana/02/2013	Montana Laboratory Services Bureau	Centers for Disease Control and Prevention
EPI440033	HA	United States	2013-Feb-03	B/New York/02/2013	New York State Department of Health	Centers for Disease Control and Prevention
EPI439040	HA	Japan	2013-Feb-08	B/CHIBA-C/26/2013	Chiba City Institute of Health and Environment	National Institute of Infectious Diseases (NIID)	Fujisaki,Seiichiro; Kim,Namhee; Itoh,Reiko; Tashiro,Masato; Odagiri,Takato
EPI439024	HA	Japan	2013-Feb-06	B/GIFU-C/6/2013	Gifu Municipal Institute of Public Health	National Institute of Infectious Diseases (NIID)	Fujisaki,Seiichiro; Kim,Namhee; Itoh,Reiko; Tashiro,Masato; Odagiri,Takato
EPI438944	HA	United States	2013-Jan-17	B/Alaska/01/2013	Alaska State Virology Lab	Centers for Disease Control and Prevention
EPI438922	HA	United States	2012-Dec-18	B/Hawaii/15/2012	State of Hawaii Department of Health	Centers for Disease Control and Prevention
EPI438793	HA	Italy	2012-Dec-11	B/Trieste/02/2012	Istituto Superiore di Sanità	National Institute for Medical Research
EPI438788	HA	Switzerland	2012-Dec-21	B/Switzerland/7659215/2012	Hopital Cantonal Universitaire de Geneves	National Institute for Medical Research
EPI438774	HA	Malta	2013-Jan-14	B/Malta/MV14378/2013	Mater Dei Hospital	National Institute for Medical Research
EPI438743	HA	Belgium	2012-Dec-25	B/Belgium/S0314/2012	Scientific Institute of Public Health	National Institute for Medical Research
EPI438741	HA	Belgium	2013-Jan-12	B/Belgium/S0081/2013	Scientific Institute of Public Health	National Institute for Medical Research
EPI438739	HA	Belgium	2012-Feb-06	B/Belgium/H20/2012	Scientific Institute of Public Health	National Institute for Medical Research
EPI432564	HA	United States	2012-Dec-14	B/New York/17/2012	New York State Department of Health	Centers for Disease Control and Prevention
EPI431356	HA	Latvia	2013-Jan-15	B/Latvia/1-40275p/2013	State Agency, Infectology Center of Latvia	National Institute for Medical Research
EPI430111	HA	Spain	2013-Feb-17	B/Catalonia/NSVH219324/2013	Hospital Universitari Vall d'Hebron	Hospital Universitari Vall d'Hebron	Anton, A; Codina, MG; Pumarola, T
EPI424234	HA	United States	2012-Dec-13	B/Nevada/3071/2012		Other Database Import	Connors,B.C.; Jones,S.L.; Sanow,A.D.; Bisaha,S.A.; Canas,L.C.; Cosme,K.W.; Davis,M.G.; Yohannes,R.A.; Abshire,J.P.; DeMarcus,L.S.; LLoyd,L.V.; Seidel,A.K.; Smith,J.P.; Macintosh,V.H.; Fumia,K.F.; Macias,E.A.; Noe,J.C.; Sjoberg,P.A.; Zorich,S.C.
EPI422709	HA	United States	2013-Jan-15	B/Wisconsin/01/2013	Wisconsin State Laboratory of Hygiene	Centers for Disease Control and Prevention
EPI419014	HA	Sweden	2012-Dec-17	B/Stockholm/18/2012		Swedish Institute for Infectious Disease Control
EPI418222	HA	United States	2013-Jan-09	B/Alabama/01/2013	Alabama State Laboratory	Centers for Disease Control and Prevention
EPI418216	HA	United States	2013-Jan-14	B/Ohio/01/2013	Ohio Department of Health Laboratories	Centers for Disease Control and Prevention
EPI417749	HA	Jordan	2012-Dec-30	B/Jordan/30014/2012	Laboratory Directorate	National Institute for Medical Research
EPI417737	HA	Portugal	2012-Dec-21	B/Braga_PT/12/2012	Instituto Nacional de Saude	National Institute for Medical Research
EPI417735	HA	Portugal	2012-Dec-23	B/Braga_PT/10/2012	Instituto Nacional de Saude	National Institute for Medical Research
EPI417730	HA	Norway	2012-Nov-14	B/Norway/2308/2012	Drammen Hospital / Vestreviken HF, Department for Medical Microbiology section Drammen	Norwegian Institute of Public Health	Kilander, A.;Khider, M.;Waalen, K.;Dudman, S.;Hungnes, O.
EPI417515	HA	United States	2012-Dec-09	B/Wisconsin/16/2012	Wisconsin State Laboratory of Hygiene	Centers for Disease Control and Prevention
EPI417426	HA	Australia	2012-Sep-08	B/TASMANIA/51/2012	Royal Hobart Hospital	WHO Collaborating Centre for Reference and Research on Influenza	Deng,Y-M., Iannello,P.,Caldwell,N., Jelley,L.,Komadina,N.
EPI417408	HA	Sri Lanka	2011-Nov-01	B/SRI LANKA/12/2011	Medical Research Institute	WHO Collaborating Centre for Reference and Research on Influenza	Deng,Y-M., Iannello,P.,Caldwell,N., Jelley,L.,Komadina,N.
EPI417395	HA	New Zealand	2012-Jun-19	B/SOUTH AUCKLAND/8/2012	Institute of Environmental Science and Research	WHO Collaborating Centre for Reference and Research on Influenza	Deng,Y-M.; Iannello,P.;Caldwell,N.;Jelley,L.;Komadina,N.
EPI417392	HA	New Zealand	2012-Jul-25	B/SOUTH AUCKLAND/30/2012	Institute of Environmental Science and Research	WHO Collaborating Centre for Reference and Research on Influenza	Deng,Y-M., Iannello,P.,Caldwell,N., Jelley,L.,Komadina,N.
EPI416447	HA	Denmark	2012-Dec-06	B/Denmark/31/2012	Statens Serum Institute	National Institute for Medical Research
EPI416441	HA	Germany	2012-Oct-25	B/Baden Wurttemberg/39/2012	Robert-Koch-Institute	National Institute for Medical Research
EPI414459	HA	United States	1996-Jan-01	B/Memphis/20/1996	Centers for Disease Control and Prevention	Centers for Disease Control and Prevention
EPI414456	HA	United States	2001-Jan-01	B/Rochester/02/2001	Centers for Disease Control and Prevention	Centers for Disease Control and Prevention
EPI408676	HA	Bangladesh	2012-Jul-19	B/Bangladesh/3849/2012	Institute of Epidemiology Disease Control and Research (IEDCR) & Bangladesh National Influenza Centre (NIC)	Centers for Disease Control and Prevention
EPI408257	HA	United States	2012-Dec-05	B/Alabama/05/2012	ADPH Bureau of Clinical Laboratories	Centers for Disease Control and Prevention
EPI408249	HA	United States	2012-Dec-06	B/Colorado/06/2012	Colorado Department of Health Lab	Centers for Disease Control and Prevention
EPI408069	HA	Norway	2012-Oct-11	B/Norway/1995/2012	WHO National Influenza Centre	National Institute for Medical Research
EPI408055	HA	Denmark	2012-Dec-06	B/Denmark/31/2012	Statens Serum Institute	National Institute for Medical Research
EPI407593	HA	United States	2012-Oct-16	B/Maryland/3039/2012		Other Database Import	Connors,B.C.; Jones,S.L.; Adams,J.E.; Bisaha,S.A.; Canas,L.C.; Cosme,K.W.; Davis,M.G.; Yohannes,R.A.; Abshire,J.P.; DeMarcus,L.S.; LLoyd,L.V.; Seidel,A.K.; Smith,J.P.; Macintosh,V.H.; Fumia,K.F.; Macias,E.A.; Noe,J.C.; Sjoberg,P.A.; Zorich,S.C.
EPI406973	HA	Bangladesh	2012-Sep-22	B/Bangladesh/9265/2012	Institute of Epidemiology Disease Control and Research (IEDCR) & Bangladesh National Influenza Centre (NIC)	Centers for Disease Control and Prevention
EPI406305	HA	Norway	2012-Mar-19	B/Norway/1072/2012	WHO National Influenza Centre	National Institute for Medical Research
EPI406260	HA	South Africa	2012-Jul-02	B/Johannesburg/3462/2012	Sandringham, National Institute for Communicable D	National Institute for Medical Research
EPI405085	HA	Sweden	2012-Nov-04	B/Stockholm/14/2012		Swedish Institute for Infectious Disease Control
EPI405031	HA	United States	2012-Oct-30	B/Florida/38/2012	Florida Department of Health-Jacksonville	Centers for Disease Control and Prevention
EPI401040	HA	Taiwan	2012-Mar-05	B/Taiwan/94818/2012		Other Database Import	Yang,J.R.; Huang,Y.P.; Chang,F.Y.; Hsu,L.C.; Lin,Y.C.; Huang,H.Y.; Wu,F.T.; Wu,H.S.; Liu,M.T.; Yang,J.-R.; Wu,H.-S.; Liu,M.-T.
EPI401037	HA	Taiwan	2012-Jan-14	B/Taiwan/94750/2012		Other Database Import	Yang,J.R.; Huang,Y.P.; Chang,F.Y.; Hsu,L.C.; Lin,Y.C.; Huang,H.Y.; Wu,F.T.; Wu,H.S.; Liu,M.T.; Yang,J.-R.; Wu,H.-S.; Liu,M.-T.
EPI401025	HA	Taiwan	2012-Jan-04	B/Taiwan/94698/2012		Other Database Import	Yang,J.R.; Huang,Y.P.; Chang,F.Y.; Hsu,L.C.; Lin,Y.C.; Huang,H.Y.; Wu,F.T.; Wu,H.S.; Liu,M.T.; Yang,J.-R.; Wu,H.-S.; Liu,M.-T.
EPI401011	HA	Taiwan	2011-Dec-09	B/Taiwan/94543/2011		Other Database Import	Yang,J.R.; Huang,Y.P.; Chang,F.Y.; Hsu,L.C.; Lin,Y.C.; Huang,H.Y.; Wu,F.T.; Wu,H.S.; Liu,M.T.; Yang,J.-R.; Wu,H.-S.; Liu,M.-T.
EPI399791	HA	Brazil	2011-Jun-02	B/Sao Paulo/39773/2011		Other Database Import	Santos,C.L.S.; Borborema,S.E.T.; Correa,K.O.; Silva,D.B.B.; Oliveira,M.I.; Paiva,T.M.
EPI399786	HA	Brazil	2011-Apr-22	B/Sao Paulo/29185/2011		Other Database Import	Santos,C.L.S.; Borborema,S.E.T.; Correa,K.O.; Silva,D.B.B.; Oliveira,M.I.; Paiva,T.M.
EPI399780	HA	Brazil	2011-Feb-12	B/Sao Paulo/9750/2011		Other Database Import	Santos,C.L.S.; Borborema,S.E.T.; Correa,K.O.; Silva,D.B.B.; Oliveira,M.I.; Paiva,T.M.
EPI399778	HA	Brazil	2011-Jan-14	B/Tocantins/3537/2011		Other Database Import	Santos,C.L.S.; Borborema,S.E.T.; Correa,K.O.; Silva,D.B.B.; Oliveira,M.I.; Paiva,T.M.
EPI399777	HA	Brazil	2010-Dec-29	B/Sao Paulo/09-12547/2010		Other Database Import	Santos,C.L.S.; Borborema,S.E.T.; Correa,K.O.; Silva,D.B.B.; Oliveira,M.I.; Paiva,T.M.
EPI399776	HA	Brazil	2010-Sep-18	B/Sao Paulo/11-17792/2010		Other Database Import	Santos,C.L.S.; Borborema,S.E.T.; Correa,K.O.; Silva,D.B.B.; Oliveira,M.I.; Paiva,T.M.
EPI398075	HA	Argentina	2012-Sep-04	B/Argentina/872/2012	Instituto Nacional de Enfermedades Infecciosas	Centers for Disease Control and Prevention
EPI398051	HA	United States	2012-Oct-13	B/Minnesota/03/2012	Minnesota Department of Health	Centers for Disease Control and Prevention
EPI397800	HA	Bolivia, Plurinationial State of	2012-Aug-17	B/Bolivia/3136/2012	Instituto Nacional de Laboratoriosde Salud (INLASA)	Centers for Disease Control and Prevention
EPI397797	HA	Bolivia, Plurinationial State of	2012-Aug-14	B/Bolivia/3099/2012	Instituto Nacional de Laboratoriosde Salud (INLASA)	Centers for Disease Control and Prevention
EPI397775	HA	United States	2012-Aug-15	B/Hawaii/12/2012	State of Hawaii Department of Health	Centers for Disease Control and Prevention
EPI397170	HA	United States	2012-Aug-31	B/Florida/32/2012	Florida Department of Health-Jacksonville	Centers for Disease Control and Prevention
EPI397164	HA	United States	2012-Jul-24	B/Hawaii/09/2012	State of Hawaii Department of Health	Centers for Disease Control and Prevention
EPI395211	HA	India	2012-Jun-19	B/India/316/2012	National Institute of Virology	Centers for Disease Control and Prevention
EPI394724	HA	India	2012-Jul-06	B/India/7688/2012	National Institute of Virology	Centers for Disease Control and Prevention
EPI394709	HA	United States	2012-Jul-20	B/Hawaii/04/2012	State of Hawaii Department of Health	Centers for Disease Control and Prevention
EPI394692	HA	United States	2012-Jul-20	B/Alaska/19/2012	Alaska State Virology Lab	Centers for Disease Control and Prevention
EPI394425	HA	Australia	2012-Jun-24	B/PERTH/114/2012	Pathwest QE II Medical Centre	WHO Collaborating Centre for Reference and Research on Influenza	Deng,Y-M; Iannello,P; Caldwell,N; Jelley,L; Komadina,N
EPI394422	HA	Australia	2012-Jul-27	B/VICTORIA/526/2012	Monash Medical Centre	WHO Collaborating Centre for Reference and Research on Influenza	Deng,Y-M; Iannello,P; Caldwell,N; Jelley,L; Komadina,N
EPI394402	HA	Singapore	2012-Mar-20	B/SINGAPORE/20/2012	National Public Health Laboratory	WHO Collaborating Centre for Reference and Research on Influenza	Deng,Y-M; Iannello,P; Caldwell,N; Jelley,L; Komadina,N
EPI394372	HA	Australia	2012-Jul-04	B/VICTORIA/8/2012	Victorian Infectious Diseases Reference Laboratory	WHO Collaborating Centre for Reference and Research on Influenza	Deng,Y-M; Iannello,P; Caldwell,N; Jelley,L; Komadina,N
EPI393643	HA	China	2012-Apr-03	B/Jilin-Chuanying/1417/2012	WHO Chinese National Influenza Center	Centers for Disease Control and Prevention
EPI393606	HA	Argentina	2012-Jul-05	B/Argentina/35/2012	Instituto Nacional de Enfermedades Infecciosas	Centers for Disease Control and Prevention
EPI393591	HA	United States	2012-Jul-10	B/Florida/29/2012	Florida Department of Health-Jacksonville	Centers for Disease Control and Prevention
EPI393564	HA	Senegal	2012-Apr-13	B/Dakar/04/2012	Institut Pasteur de Dakar	National Institute for Medical Research
EPI393424	HA	Japan	2012-May-24	B/WAKAYAMA-C/22/2012	Wakayama City Institute of Public Health	National Institute of Infectious Diseases (NIID)	Fujisaki,Seiichiro; Kim,Namhee; Aya,Sato; Tahiro,Masato; Odagiri,Takato'
EPI392604	HA	Madagascar	2012-Feb-27	B/Madagascar/01593/2012	Institut Pasteur de Madagascar	National Institute for Medical Research
EPI392600	HA	France	2012-Apr-28	B/Lorraine/1408/2012	CRR virus Influenza region Sud	National Institute for Medical Research
EPI392591	HA	Hong Kong (SAR)	2012-Jun-13	B/Hong Kong/3579/2012	Government Virus Unit	National Institute for Medical Research
EPI392566	HA	France	2012-Mar-24	B/Djibouti/IP1157/2012	CRR virus Influenza region Sud	National Institute for Medical Research
EPI391330	HA	United States	2012-Jul-16	B/Washington/12/2012	Washington State Public Health Laboratory	Centers for Disease Control and Prevention
EPI387724	HA	Bangladesh	2012-Jun-10	B/Bangladesh/6704/2012	Institute of Epidemiology Disease Control and Research (IEDCR) & Bangladesh National Influenza Centre (NIC)	Centers for Disease Control and Prevention
EPI386060	HA	United States	2012-Jun-14	B/Michigan/06/2012	Michigan Department of Community Health	Centers for Disease Control and Prevention
EPI382051	HA	Japan	2012-Mar-12	B/KAGAWA/12/2012	Kagawa Prefectural Research Institute for Environmental Sciences and Public Health	National Institute of Infectious Diseases (NIID)	Fujisaki,Seiichiro; Kim,Namhee; Aya,Sato; Tashiro,Masato; Odagiri,Takato'
EPI381489	HA	Nicaragua	2008-Jun-09	B/Managua/36.01/2008		Other Database Import	Wentworth,D.E.; Dugan,V.; Halpin,R.; Lin,X.; Bera,J.; Ghedin,E.; Hostetler,J.; Fedorova,N.; Overton,L.; Tsitrin,T.; Stockwell,T.; Katzel,D.; Li,K.; Amedeo,P.; Schobel,S.; Shrivastava,S.; Wang,S.; Thovarai,V.; Bishop,B.; Edworthy,P.; Kim,M.; Gordon,A.; Harris,E.; Balmaseda,A.; Saborio,S.; Guillermina,K.; Bao,Y.; Sanders,R.; Dernovoy,D.; Kiryutin,B.; Lipman,D.J.; Tatusova,T.
EPI380010	HA	United States	2012-Apr-26	B/New Jersey/01/2012	New Jersey Department of Health & Senior Services	Centers for Disease Control and Prevention
EPI379942	HA	Ukraine	2012-Mar-03	B/Ukraine/104/2012	Institute of Epidemiology and Infectious Diseases AMS of Ukraine	National Institute for Medical Research
EPI379936	HA	Sweden	2012-Feb-09	B/Stockholm/5/2012	Swedish Institute for Infectious Disease Control	National Institute for Medical Research
EPI379553	HA	Thailand	2012-Mar-02	B/NONTHABURI/45/2012	WHO National Influenza Centre, National Institute of Medical Research (NIMR)	WHO Collaborating Centre for Reference and Research on Influenza	Deng,Y-M; Iannello,P; Caldwell,N; Jelley,L; Komadina,N
EPI379551	HA	Malaysia	2012-Mar-01	B/MALAYSIA/346/2012	Institut Penyelidikan Perubatan	WHO Collaborating Centre for Reference and Research on Influenza	Deng,Y-M; Iannello,P; Caldwell,N; Jelley,L; Komadina,N
EPI379468	HA	Australia	2011-Aug-16	B/BRISBANE/81/2011	Queensland Health Scientific Services	WHO Collaborating Centre for Reference and Research on Influenza	Deng,Y-M; Iannello,P; Caldwell,N; Jelley,L; Komadina,N
EPI379421	HA	Australia	2012-Apr-11	B/TOWNSVILLE/3/2012	Queensland Health Scientific Services	WHO Collaborating Centre for Reference and Research on Influenza	Deng,Y-M; Iannello,P; Caldwell,N; Jelley,L; Komadina,N
EPI379379	HA	Australia	2012-Mar-16	B/PERTH/34/2012	Pathwest QE II Medical Centre	WHO Collaborating Centre for Reference and Research on Influenza	Deng,Y-M; Iannello,P; Caldwell,N; Jelley,L; Komadina,N
EPI378244	HA	Lao, People's Democratic Republic	2012-Jan-05	B/Laos/I008/2012	Ministry of Health Laos	National Institute of Infectious Diseases (NIID)	Fujisaki,Seiichiro; Kim,Namhee; Aya,Sato; Tahiro,Masato; Odagiri,Takato'
EPI378189	HA	Chile	2012-May-08	B/Santiago/32756/2012	Instituto de Salud Publica de Chile	Centers for Disease Control and Prevention
EPI378183	HA	China	2012-Mar-06	B/Hubei-Lunan/1159/2012	WHO Chinese National Influenza Center	Centers for Disease Control and Prevention
EPI378151	HA	United States	2012-May-22	B/Wyoming/03/2012	Wyoming Public Health Laboratory	Centers for Disease Control and Prevention
EPI378143	HA	United States	2012-May-04	B/Wyoming/02/2012	Wyoming Public Health Laboratory	Centers for Disease Control and Prevention
EPI378134	HA	United States	2012-May-23	B/Florida/06/2012	Florida Department of Health-Jacksonville	Centers for Disease Control and Prevention
EPI378061	HA	United States	2012-Apr-12	B/New York/03/2012	New York City Department of Health	Centers for Disease Control and Prevention
EPI377682	HA	Slovenia	2012-Mar-26	B/Slovenia/955/2012	Laboratory for Virology, National Institute of Public Health	National Institute for Medical Research
EPI377206	HA	Japan	2012-Jan-30	B/WAKAYAMA-C/5/2012	Wakayama City Institute of Public Health	National Institute of Infectious Diseases (NIID)	Fujisaki,Seiichiro; Kim,Namhee; Aya,Sato; Tahiro,Masato; Odagiri,Takato'
EPI377168	HA	Spain	2012-Mar-20	B/Catalonia/S5070/2012	Barcelona, Facultad de Medicina	Hospital Clinic	Anton, A.; Isanta, R.; Pumarola, T.
EPI376324	HA	United States	2012-May-07	B/Rhode Island/02/2012	Rhode Island Department of Health	Centers for Disease Control and Prevention
EPI374503	HA	Malaysia	2007-Apr-01	B/Malaysia/1733951/2007		Other Database Import	Wentworth,D.E.; Dugan,V.; Halpin,R.; Lin,X.; Bera,J.; Ghedin,E.; Fedorova,N.; Overton,L.; Tsitrin,T.; Stockwell,T.; Katzel,D.; Li,K.; Amedeo,P.; Schobel,S.; Shrivastava,S.; Wang,S.; Thovarai,V.; Bishop,B.; Edworthy,P.; Kim,M.; Chan,Y.F.; Sam,I.C.; AbuBakar,S.; Chang,L.Y.; Nor&apos;e,S.S.; Jafar,F.L.; Hassan,A.; Ahmad-Nasrah,S.N.; Bao,Y.; Sanders,R.; Dernovoy,D.; Kiryutin,B.; Lipman,D.J.; Tatusova…
EPI374407	HA	Malaysia	2005-Jan-28	B/Malaysia/30743/2005		Other Database Import	Wentworth,D.E.; Dugan,V.; Halpin,R.; Lin,X.; Bera,J.; Ghedin,E.; Fedorova,N.; Overton,L.; Tsitrin,T.; Stockwell,T.; Katzel,D.; Li,K.; Amedeo,P.; Schobel,S.; Shrivastava,S.; Wang,S.; Thovarai,V.; Bishop,B.; Edworthy,P.; Kim,M.; Chan,Y.F.; Sam,I.C.; AbuBakar,S.; Chang,L.Y.; Nor&apos;e,S.S.; Jafar,F.L.; Hassan,A.; Ahmad-Nasrah,S.N.; Bao,Y.; Sanders,R.; Dernovoy,D.; Kiryutin,B.; Lipman,D.J.; Tatusova…
EPI374375	HA	Malaysia	2004-Dec-22	B/Malaysia/30397/2004		Other Database Import	Wentworth,D.E.; Dugan,V.; Halpin,R.; Lin,X.; Bera,J.; Ghedin,E.; Fedorova,N.; Overton,L.; Tsitrin,T.; Stockwell,T.; Katzel,D.; Li,K.; Amedeo,P.; Schobel,S.; Shrivastava,S.; Wang,S.; Thovarai,V.; Bishop,B.; Edworthy,P.; Kim,M.; Chan,Y.F.; Sam,I.C.; AbuBakar,S.; Chang,L.Y.; Nor&apos;e,S.S.; Jafar,F.L.; Hassan,A.; Ahmad-Nasrah,S.N.; Bao,Y.; Sanders,R.; Dernovoy,D.; Kiryutin,B.; Lipman,D.J.; Tatusova…
EPI373065	HA	Malaysia	2007-Nov-07	B/Malaysia/1887872/2007		Other Database Import	Wentworth,D.E.; Dugan,V.; Halpin,R.; Lin,X.; Bera,J.; Ghedin,E.; Fedorova,N.; Overton,L.; Tsitrin,T.; Stockwell,T.; Katzel,D.; Li,K.; Amedeo,P.; Schobel,S.; Shrivastava,S.; Wang,S.; Thovarai,V.; Bishop,B.; Edworthy,P.; Kim,M.; Chan,Y.F.; Sam,I.C.; AbuBakar,S.; Chang,L.Y.; Nor&apos;e,S.S.; Jafar,F.L.; Hassan,A.; Ahmad-Nasrah,S.N.; Bao,Y.; Sanders,R.; Dernovoy,D.; Kiryutin,B.; Lipman,D.J.; Tatusova…
EPI373045	HA	United States	2012-Mar-22	B/Idaho/01/2012	State of Idaho Bureau of Laboratories	Centers for Disease Control and Prevention
EPI370739	HA	Japan	2012-Feb-06	B/IWATE/4/2012	Research Institute for Environmental Sciences and Public Health of Iwate Prefecture	National Institute of Infectious Diseases (NIID)	Fujisaki,Seiichiro; Kim,Namhee; Aya,Sato; Tahiro,Masato; Odagiri,Takato'
EPI370725	HA	Lao, People's Democratic Republic	2011-Nov-28	B/Laos/I969/2011	Ministry of Health Laos	National Institute of Infectious Diseases (NIID)	Fujisaki,Seiichiro; Kim,Namhee; Aya,Sato; Tahiro,Masato; Odagiri,Takato'
EPI370715	HA	Japan	2012-Jan-19	B/NAGANO-C/7/2012	Nagano City Health Center	National Institute of Infectious Diseases (NIID)	Fujisaki,Seiichiro; Kim,Namhee; Aya,Sato; Tahiro,Masato; Odagiri,Takato'
EPI370147	HA	Australia	2012-Jan-22	B/DARWIN/3/2012	Royal Darwin Hospital	WHO Collaborating Centre for Reference and Research on Influenza	Deng,Y-M; Iannello,P; Caldwell,N; Komadina,N.
EPI370120	HA	Singapore	2011-Nov-03	B/SINGAPORE/26/2011	National Public Health Laboratory	WHO Collaborating Centre for Reference and Research on Influenza	Deng,Y-M; Iannello,P; Caldwell,N; Komadina,N.
EPI370039	HA	Singapore	2011-Nov-17	B/SINGAPORE/42/2011	National Public Health Laboratory	WHO Collaborating Centre for Reference and Research on Influenza	Deng,Y-M; Iannello,P; Caldwell,N; Komadina,N.
EPI370033	HA	Singapore	2011-Nov-01	B/SINGAPORE/31/2011	National Public Health Laboratory	WHO Collaborating Centre for Reference and Research on Influenza	Deng,Y-M; Iannello,P; Caldwell,N; Komadina,N.
EPI368779	HA	Chile	2012-Feb-19	B/Santiago/11896/2012	Instituto de Salud Publica de Chile	Centers for Disease Control and Prevention
EPI368776	HA	Ethiopia	2012-Mar-14	B/Ethiopia/32/2012	Ethiopian Health and Nutrition Research Institute (EHNRI)	Centers for Disease Control and Prevention
EPI368743	HA	United States	2012-Jan-01	B/Wisconsin/03/2012	Wisconsin State Laboratory of Hygiene	Centers for Disease Control and Prevention
EPI368374	HA	United States	2012-Feb-21	B/North Carolina/01/2012	North Carolina State Laboratory of Public Health	Centers for Disease Control and Prevention
EPI366461	HA	Australia	2008-Jan-01	B/Brisbane/60/2008		Other Database Import	Wentworth,D.E.; Dugan,V.; Halpin,R.; Lin,X.; Bera,J.; Ghedin,E.; Fedorova,N.; Overton,L.; Tsitrin,T.; Stockwell,T.; Amedeo,P.; Bishop,B.; Chen,H.; Edworthy,P.; Gupta,N.; Katzel,D.; Li,K.; Schobel,S.; Shrivastava,S.; Thovarai,V.; Wang,S.; Ramanunninair,M.; Silverman,J.; Devis,R.; Phan,L.; Le,J.; Pokorny,B.A.; Onodera,S.; Fulvini,A.A.; He,Y.; Kilbourne,E.D.; Bucher,D.; Bao,Y.; Sanders,R.; Dernovoy,…
EPI366227	HA	Kenya	2010-Nov-09	B/Kenya/2050/2010	CDC-Kenya	Centers for Disease Control and Prevention
EPI363722	HA	United States	2011-Feb-11	B/Boston/DB01/2011		Other Database Import	Wentworth,D.E.; Dugan,V.; Halpin,R.; Lin,X.; Bera,J.; Ghedin,E.; Hostetler,J.; Fedorova,N.; Overton,L.; Tsitrin,T.; Stockwell,T.; Katzel,D.; Li,K.; Amedeo,P.; Schobel,S.; Shrivastava,S.; Wang,S.; Thovarai,V.; Bishop,B.; Edworthy,P.; Kim,M.; Donnino,M.; Cocchi,M.; Salciccioli,J.; Giberson,B.; Bourgeois,F.; Jones-Bamman,C.; Bao,Y.; Sanders,R.; Dernovoy,D.; Kiryutin,B.; Lipman,D.J.; Tatusova,T.
EPI357762	HA	Cameroon	2011-Nov-15	B/Yaounde/11V-20028/2011	Centre Pasteur du Cameroun	National Institute for Medical Research
EPI357748	HA	Cameroon	2011-Aug-26	B/Yaounde/11V-18472 GVFI/2011	Centre Pasteur du Cameroun	National Institute for Medical Research
EPI357708	HA	Denmark	2011-Mar-23	B/Denmark/23/2011	Statens Serum Institute	National Institute for Medical Research
EPI357702	HA	Switzerland	2011-Nov-21	B/Switzerland/5632623/2011	Hopital Cantonal Universitaire de Geneves	National Institute for Medical Research
EPI357602	HA	Australia	2011-Nov-18	B/BRISBANE/125/2011	Queensland Health Scientific Services	WHO Collaborating Centre for Reference and Research on Influenza	Deng,Y-M; Iannello,P; Caldwell,N; Komadina,N.
EPI357588	HA	Australia	2011-Nov-29	B/VICTORIA/859/2011	Austin Health	WHO Collaborating Centre for Reference and Research on Influenza	Deng,Y-M; Iannello,P; Caldwell,N; Komadina,N.
EPI357557	HA	Australia	2011-Sep-11	B/SYDNEY/515/2011	Childrens Hospital Westmead	WHO Collaborating Centre for Reference and Research on Influenza	Deng,Y-M; Iannello,P; Caldwell,N; Komadina,N.
EPI357403	HA	Sweden	2011-Feb-28	B/Stockholm/12/2011	National Institute for Medical Research	Centers for Disease Control and Prevention
EPI356988	HA	Japan	2011-Dec-14	B/OSAKA-C/1035/2011	Osaka City Institute of Public Health and Environmental Sciences	National Institute of Infectious Diseases (NIID)	Fujisaki,Seiichiro; Kim,Namhee; Aya,Sato; Tahiro,Masato; Odagiri,Takato'
EPI356976	HA	Japan	2012-Jan-15	B/KOBE/297/2012	Kobe Institute of Health	National Institute of Infectious Diseases (NIID)	Fujisaki,Seiichiro; Kim,Namhee; Aya,Sato; Tahiro,Masato; Odagiri,Takato'
EPI356974	HA	Japan	2012-Jan-10	B/YAMAGATA/3/2012	Yamagata Prefectural Institute of Public Health	National Institute of Infectious Diseases (NIID)	Fujisaki,Seiichiro; Kim,Namhee; Aya,Sato; Tahiro,Masato; Odagiri,Takato'
EPI356967	HA	Japan	2012-Jan-13	B/MIE/3/2012	Mie Prefecture Health and Environment Research Institute	National Institute of Infectious Diseases (NIID)	Fujisaki,Seiichiro; Kim,Namhee; Aya,Sato; Tahiro,Masato; Odagiri,Takato'
EPI356023	HA	Nigeria	2011-Jan-25	B/Nigeria/5451/2011	National Influenza Reference Laboratory	Centers for Disease Control and Prevention
EPI356009	HA	United States	2012-Jan-07	B/Iowa/01/2012	Iowa State Hygienic Laboratory	Centers for Disease Control and Prevention
EPI355024	HA	Japan	2011-Nov-21	B/FUKUI/48/2011	Fukui Prefectural Institute of Public Health	National Institute of Infectious Diseases (NIID)	Fujisaki,Seiichiro; Kim,Namhee; Aya,Sato; Tahiro,Masato; Odagiri,Takato'
EPI354052	HA	Chile	2011-Mar-25	B/Santiago/6025/2011	Instituto de Salud Publica de Chile	Centers for Disease Control and Prevention
EPI353998	HA	United States	2012-Jan-03	B/New Hampshire/01/2012	New Hampshire Public Health Laboratories	Centers for Disease Control and Prevention
EPI353985	HA	India	2011-Dec-16	B/India/8575/2011	National Institute of Virology	Centers for Disease Control and Prevention
EPI353973	HA	China	2011-Nov-07	B/Hubei-Xiangcheng/1527/2011	WHO Chinese National Influenza Center	Centers for Disease Control and Prevention
EPI353964	HA	Guatemala	2011-Nov-13	B/Guatemala/38/2011	Laboratorio Nacional De Salud Guatemala	Centers for Disease Control and Prevention
EPI352421	HA	Sweden	2011-Nov-15	B/Sweden/2/2011	Swedish Institute for Infectious Disease Control	National Institute for Medical Research
EPI351328	HA	Taiwan	2011-Nov-20	B/Taiwan/1242/2011	ADImmune Corporation	Centers for Disease Control and Prevention
EPI351325	HA	United States	2011-Dec-22	B/Texas/10/2011	Tarrant County Public Health	Centers for Disease Control and Prevention
EPI349330	HA	United States	2011-Dec-17	B/Utah/06/2011	Utah Public Health Laboratory	Centers for Disease Control and Prevention
EPI348452	HA	Cambodia	2011-Oct-10	B/Cambodia/1412/2011	National Public Health Laboratory	Centers for Disease Control and Prevention
EPI347927	HA	China	2011-Nov-08	B/Fujian-Gulou/1727/2011	WHO Chinese National Influenza Center	WHO Chinese National Influenza Center	Yu Lan,Xiyan Li,Xiang Zhao,Yanhui Cheng,minju Tan,Yaoyao Chen,Bin Liu,Dayan Wang,Dexin Li,Yuelong Shu
EPI347860	HA	China	2011-Oct-03	B/Hunan-Suxian/1313/2011	WHO Chinese National Influenza Center	WHO Chinese National Influenza Center	Yu Lan,Xiyan Li,Xiang Zhao,Yanhui Cheng,minju Tan,Yaoyao Chen,Bin Liu,Dayan Wang,Dexin Li,Yuelong Shu
EPI347858	HA	China	2011-Sep-29	B/Jiangxi-Donghu/1413/2011	WHO Chinese National Influenza Center	WHO Chinese National Influenza Center	Yu Lan,Xiyan Li,Xiang Zhao,Yanhui Cheng,minju Tan,Yaoyao Chen,Bin Liu,Dayan Wang,Dexin Li,Yuelong Shu
EPI346965	HA	Canada	2011-Sep-10	B/Alberta/RV1394/2011	National Microbiology Laboratory, Health Canada	Centers for Disease Control and Prevention
EPI346959	HA	United States	2011-Oct-19	B/Alaska/09/2011	Alaska State Virology Lab	Centers for Disease Control and Prevention
EPI346954	HA	Morocco	2011-Jan-18	B/Marrakech/281/2011	Institut National d Hygiene, Ministere de la sante sante	National Institute of Hygien	A,Barakat;H,Ihazmade;F,Elfalaki;A,Bimouhen;Z,Regragui
EPI346952	HA	Morocco	2010-Dec-13	B/Tanger/63/2010	Institut National d Hygiene, Ministere de la sante sante	National Institute of Hygien	H,Ihazmade;A,Barakat;F,Elfalaki;A,Bimouhen;Z,Regragui
EPI346797	HA	Kazakhstan	2011-Feb-24	B/Kazakhstan/2133/2011	National Reference Laboratory	National Institute for Medical Research
EPI346783	HA	Cameroon	2011-May-31	B/Cameroon11V-12076 GVFI/2011	Centre Pasteur du Cameroun	National Institute for Medical Research
EPI346746	HA	Ukraine	2011-Jan-27	B/Dnepropetrovsk/4719/2011	Institute of Epidemiology and Infectious Diseases AMS of Ukraine	National Institute for Medical Research
EPI346742	HA	Ukraine	2011-Jan-20	B/Donetsk/4546/2011	Institute of Epidemiology and Infectious Diseases AMS of Ukraine	National Institute for Medical Research
EPI346480	HA	Morocco	2011-Jan-27	B/Tanger/146/2011	Institut National d Hygiene, Ministere de la sante sante	National Institute of Hygien
EPI346141	HA	Australia	2011-Sep-06	B/BRISBANE/99/2011	Queensland Health Scientific Services	WHO Collaborating Centre for Reference and Research on Influenza	Deng,Y-M.; Iannello,P.; Caldwell,N.; Leang,S-K; Komadina,N.
EPI346135	HA	Australia	2011-Sep-05	B/SOUTH AUSTRALIA/327/2011	Institute of Medical and Veterinary Science (IMVS)	WHO Collaborating Centre for Reference and Research on Influenza	Deng,Y-M.; Iannello,P.; Caldwell,N.; Leang,S-K; Komadina,N.
EPI346081	HA	Cambodia	2011-Jun-29	B/CAMBODIA/26/2011	Institute Pasteur du Cambodia	WHO Collaborating Centre for Reference and Research on Influenza	Deng,Y-M.; Iannello,P.; Caldwell,N.; Leang,S-K; Komadina,N.
EPI346012	HA	Australia	2011-Jul-03	B/NEWCASTLE/1/2011	John Hunter Hospital	WHO Collaborating Centre for Reference and Research on Influenza	Deng,Y-M.; Iannello,P.; Caldwell,N.; Leang,S-K; Komadina,N.
EPI346001	HA	Morocco	2011-Jan-26	B/Rabat/123/2011	Institut National d Hygiene, Ministere de la sante sante	National Institute of Hygien	ihazmade,hassan;bimouhen,abderrahman;fatima ,elfalaki;regragui,zakia
EPI345861	HA	Nicaragua	2010-Sep-17	B/Managua/5549.04/2010		Other Database Import	The NIAID Influenza Genome Sequencing Consortium
EPI345845	HA	Nicaragua	2010-Jul-03	B/Managua/1312.01/2010		Other Database Import	The NIAID Influenza Genome Sequencing Consortium
EPI342025	HA	Germany	2010-Oct-18	B/Niedersachsen/01/2010	National Institute for Medical Research	Centers for Disease Control and Prevention
EPI340849	HA	Vietnam	2011-Mar-22	B/Vietnam/92/2011	National Institute of Hygiene and Epidemiology	Centers for Disease Control and Prevention
EPI338918	HA	United States	2005-Feb-22	B/California/NHRC0008/2005		Other Database Import	The NIAID Influenza Genome Sequencing Consortium
EPI338330	HA	Sweden	2011-Aug-05	B/Karlstad/3/2011		Swedish Institute for Infectious Disease Control
EPI338073	HA	United States	2003-Mar-10	B/California/NHRC0005/2003		Other Database Import	The NIAID Influenza Genome Sequencing Consortium
EPI338049	HA	United States	2005-Apr-08	B/Texas/NHRC0001/2005		Other Database Import	The NIAID Influenza Genome Sequencing Consortium
EPI338041	HA	United States	2004-Dec-23	B/South Carolina/NHRC0001/2004		Other Database Import	The NIAID Influenza Genome Sequencing Consortium
EPI338033	HA	United States	2003-Mar-04	B/Missouri/NHRC0001/2003		Other Database Import	The NIAID Influenza Genome Sequencing Consortium
EPI335768	HA	Bolivia, Plurinationial State of	2011-Aug-30	B/Bolivia/812/2011	CENETROP	Centers for Disease Control and Prevention
EPI335765	HA	Dominican Republic	2011-Jul-11	B/Dominican Republic/5508/2011	Laboratorio de Investigacion / Centro de Educacion Medica y Amistad Dominico Japones (CEMADOJA)	Centers for Disease Control and Prevention
EPI335759	HA	Bangladesh	2011-Aug-01	B/Bangladesh/9234/2011	Institute of Epidemiology Disease Control and Research (IEDCR) & Bangladesh National Influenza Centre (NIC)	Centers for Disease Control and Prevention
EPI334658	HA	France	2011-Apr-20	B/Lyon/CHU/16.432/2011	CRR virus Influenza region Sud	National Institute for Medical Research
EPI333043	HA	Australia	2011-Jun-22	B/VICTORIA/1/2011		WHO Collaborating Centre for Reference and Research on Influenza
EPI333039	HA	Australia	2011-Jun-25	B/SOUTH AUSTRALIA/73/2011	Institute of Medical and Veterinary Science (IMVS)	WHO Collaborating Centre for Reference and Research on Influenza
EPI332673	HA	Thailand	2011-Mar-01	B/SONG KHLA/43/2011	WHO National Influenza Centre, National Institute of Medical Research (NIMR)	WHO Collaborating Centre for Reference and Research on Influenza	Deng,Y-M.; Iannello,P.; Caldwell,N.; Leang,S-K; Komadina,N.
EPI331576	HA	Australia	2011-May-03	B/TASMANIA/1/2011	Royal Hobart Hospital	WHO Collaborating Centre for Reference and Research on Influenza	Deng,Y-M.; Iannello,P.; Caldwell,N.; Leang,S-K; Komadina,N.
EPI331417	HA	Australia	2011-Feb-18	B/BRISBANE/10/2011	Queensland Health Scientific Services	WHO Collaborating Centre for Reference and Research on Influenza	Deng,Y-M.; Iannello,P.; Caldwell,N.; Leang,S-K; Komadina,N.
EPI331354	HA	Australia	2010-Dec-17	B/BRISBANE/40/2010	Queensland Health Scientific Services	WHO Collaborating Centre for Reference and Research on Influenza	Deng,Y-M.; Iannello,P.; Caldwell,N.; Leang,S-K; Komadina,N.
EPI331192	HA	Uganda	2011-Jun-14	B/Uganda/2719/2011	Uganda Virus Research Institute (UVRI), National Influenza Center	Centers for Disease Control and Prevention
EPI331160	HA	United States	2011-May-14	B/New Mexico/05/2011	New Mexico Department of Health	Centers for Disease Control and Prevention
EPI331141	HA	United States	2011-Apr-20	B/Massachusetts/03/2011	Massachusetts Department of Public Health	Centers for Disease Control and Prevention
EPI331112	HA	Brazil	2011-Jun-02	B/Brazil/9442/2011	Instituto Adolfo Lutz	Centers for Disease Control and Prevention
EPI331102	HA	Slovenia	2011-Feb-15	B/Slovenia/1010/2011	Laboratory for Virology, National Institute of Public Health	National Institute for Medical Research
EPI331098	HA	Ghana	2011-Jun-03	B/Ghana/847/2011	University of Ghana	National Institute for Medical Research
EPI330961	HA	China	2011-Jun-18	B/Chongqing-Wanzhou/1294/2011	WHO Chinese National Influenza Center	WHO Chinese National Influenza Center	Lan,Yu;Wang,Dayan;Li,Xiyan;Huang,Weijuan;Zhao,Xiang;Chen,Yaoyao;Yang,Lei;Shu,Yuelong
EPI330817	HA	China	2011-May-03	B/Anhui-Luyang/1142/2011	WHO Chinese National Influenza Center	WHO Chinese National Influenza Center	Lan,Yu;Wang,Dayan;Li,Xiyan;Huang,Weijuan;Zhao,Xiang;Chen,Yaoyao;Yang,Lei;Shu,Yuelong
EPI330641	HA	China	2011-Apr-12	B/Shanghai-Luwan/1188/2011	WHO Chinese National Influenza Center	WHO Chinese National Influenza Center	Lan,Yu;Wang,Dayan;Li,Xiyan;Huang,Weijuan;Zhao,Xiang;Chen,Yaoyao;Yang,Lei;Shu,Yuelong
EPI330625	HA	China	2011-Apr-12	B/Chongqing-Jiulongpo/39/2011	WHO Chinese National Influenza Center	WHO Chinese National Influenza Center	Lan,Yu;Wang,Dayan;Li,Xiyan;Huang,Weijuan;Zhao,Xiang;Chen,Yaoyao;Yang,Lei;Shu,Yuelong
EPI330492	HA	China	2011-Feb-03	B/Chongqing-Wanzhou/145/2011	WHO Chinese National Influenza Center	WHO Chinese National Influenza Center	Lan,Yu;Wang,Dayan;Li,Xiyan;Huang,Weijuan;Zhao,Xiang;Chen,Yaoyao;Yang,Lei;Shu,Yuelong
EPI330236	HA	China	2011-Mar-10	B/Beijing-Huairou/1338/2011	WHO Chinese National Influenza Center	WHO Chinese National Influenza Center	Lan,Yu;Wang,Dayan;Li,Xiyan;Huang,Weijuan;Zhao,Xiang;Chen,Yaoyao;Yang,Lei;Shu,Yuelong
EPI330124	HA	China	2011-Feb-22	B/Shanghai-Huangpu/171/2011	WHO Chinese National Influenza Center	WHO Chinese National Influenza Center	Lan,Yu;Wang,Dayan;Li,Xiyan;Huang,Weijuan;Zhao,Xiang;Chen,Yaoyao;Yang,Lei;Shu,Yuelong
EPI326185	HA	Slovakia	2011-Feb-07	B/Slovakia/302/2011	National Public Health Institute of Slovakia	National Institute for Medical Research
EPI326171	HA	Serbia	2011-Mar-08	B/Serbia/1894/2011	Institute of Immunology and Virology Torlak	National Institute for Medical Research
EPI326165	HA	Hong Kong (SAR)	2011-Apr-20	B/Hong Kong/591/2011	Government Virus Unit	National Institute for Medical Research
EPI326153	HA	United Kingdom	2010-Dec-14	B/England/684/2010	Microbiology Services Colindale, Public Health England	National Institute for Medical Research
EPI325283	HA	China	2010-Dec-22	B/Shanghai-Zhangning/1725/2010	WHO Chinese National Influenza Center	Centers for Disease Control and Prevention
EPI325264	HA	United States	2011-Feb-08	B/North Carolina/24/2011	North Carolina State Laboratory of Public Health	Centers for Disease Control and Prevention
EPI325204	HA	United States	2011-Mar-14	B/Nevada/11/2011	Southern Nevada Public Health Lab	Centers for Disease Control and Prevention
EPI325182	HA	United States	2011-Mar-01	B/Missouri/03/2011	Missouri Department. of Health & Senior Services	Centers for Disease Control and Prevention
EPI325174	HA	United States	2011-Feb-23	B/Missouri/02/2011	Missouri Department. of Health & Senior Services	Centers for Disease Control and Prevention
EPI325171	HA	United States	2011-Feb-18	B/Mississippi/02/2011	Mississippi Public Health Laboratory	Centers for Disease Control and Prevention
EPI325150	HA	United States	2011-Apr-04	B/Maryland/03/2011	Maryland Department of Health and Mental Hygiene	Centers for Disease Control and Prevention
EPI325143	HA	United States	2011-Mar-13	B/Louisiana/11/2011	Louisiana Department of Health and Hospitals	Centers for Disease Control and Prevention
EPI325131	HA	United States	2011-Jan-09	B/Kansas/01/2011	Kansas Department of Health and Environment	Centers for Disease Control and Prevention
EPI334449	HA	Bangladesh	2011-Mar-22	B/Bangladesh/1585/2011	Institute of Epidemiology Disease Control and Research (IEDCR) & Bangladesh National Influenza Centre (NIC)	Centers for Disease Control and Prevention
EPI325071	HA	Russian Federation	2011-Feb-14	B/Astrakhan/04/2011	Russian Academy of Medical Sciences	Centers for Disease Control and Prevention
EPI325068	HA	United States	2011-Apr-19	B/Arkansas/04/2011	Arkansas Department of Health	Centers for Disease Control and Prevention
EPI325065	HA	United States	2011-Feb-28	B/Arkansas/03/2011	Arkansas Department of Health	Centers for Disease Control and Prevention
EPI319569	HA	Sweden	2011-Mar-11	B/Sweden1/2011		Swedish Institute for Infectious Disease Control
EPI319429	HA	France	2010-Jan-01	B/Lyon/CHU/47.320/2010	CRR virus Influenza region Sud	National Institute for Medical Research
EPI319427	HA	Ukraine	2010-Jan-01	B/Hmelnizk/4322/2010	Institute of Epidemiology and Infectious Diseases AMS of Ukraine	National Institute for Medical Research
EPI319423	HA	Cameroon	2010-Nov-09	B/Cameroon/10v-4954/2010	Centre Pasteur du Cameroun	National Institute for Medical Research
EPI319383	HA	France	2011-Jan-03	B/Lyon/74/2011	CRR virus Influenza region Sud	National Institute for Medical Research
EPI319367	HA	Spain	2010-Dec-14	B/LaRioja/RR6969/2010	Universidad de Valladolid	National Institute for Medical Research
EPI319337	HA	Ukraine	2011-Jan-11	B/Doneck/4353/2011	Institute of Epidemiology and Infectious Diseases AMS of Ukraine	National Institute for Medical Research
EPI312976	HA	United States	2011-Feb-15	B/Wyoming/02/2011	Wyoming Public Health Laboratory	Centers for Disease Control and Prevention
EPI312912	HA	China	2011-Jan-27	B/Shanghai-Zhangning/188/2011	WHO Chinese National Influenza Center	Centers for Disease Control and Prevention
EPI312835	HA	United States	2011-Jan-14	B/Missouri/01/2011	Missouri Department. of Health & Senior Services	Centers for Disease Control and Prevention
EPI312832	HA	United States	2011-Jan-31	B/Minnesota/02/2011	Minnesota Department of Health	Centers for Disease Control and Prevention
EPI312815	HA	United States	2011-Mar-10	B/Maine/04/2011	Maine Health and Environmental Testing Laboratory	Centers for Disease Control and Prevention
EPI312767	HA	United States	2011-Feb-14	B/Connecticut/02/2011	Connecticut Department. of Public Health	Centers for Disease Control and Prevention
EPI309705	HA	Italy	2011-Jan-03	B/Genoa/02/2011	University of Genoa	National Institute for Medical Research
EPI309296	HA	United States	2011-Jan-18	B/Wyoming/01/2011	Wyoming Public Health Laboratory	Centers for Disease Control and Prevention
EPI309254	HA	United States	2010-Nov-26	B/New York/02/2010	New York State Department of Health	Centers for Disease Control and Prevention
EPI309236	HA	United States	2011-Feb-04	B/Nebraska/04/2011	Nebraska Public Health Lab	Centers for Disease Control and Prevention
EPI309185	HA	United States	2011-Jan-04	B/Illinois/01/2011	Illinois Department of Public Health-Chicago	Centers for Disease Control and Prevention
EPI309171	HA	United States	2010-Dec-21	B/California/13/2010	California Department of Health Services	Centers for Disease Control and Prevention
EPI305380	HA	Belgium	2010-Dec-13	B/Brussels/G0710/2010	Scientific Institute of Public Health	National Institute for Medical Research
EPI305379	HA	Belgium	2010-Dec-09	B/Brussels/G0707/2010	Scientific Institute of Public Health	National Institute for Medical Research
EPI304404	HA	Australia	2010-Sep-22	B/PERTH/227/2010	Pathwest QE II Medical Centre	WHO Collaborating Centre for Reference and Research on Influenza	Deng,Y-M.; Iannello,P.; Caldwell,N.; Leang,S-Y; Komadina,N.
EPI304401	HA	Philippines	2010-Nov-24	B/PHILIPPINES/2146/2010	Research Institute of Tropical Medicine	WHO Collaborating Centre for Reference and Research on Influenza	Deng,Y-M.; Iannello,P.; Caldwell,N.; Leang,S-Y; Komadina,N.
EPI302499	HA	Guatemala	2010-Oct-12	B/Guatemala/775/2010	Laboratorio Nacional De Salud Guatemala	Centers for Disease Control and Prevention
EPI302445	HA	Hong Kong (SAR)	2010-Dec-25	B/HONG KONG/2225/2010	Government Virus Unit	WHO Collaborating Centre for Reference and Research on Influenza	Deng,Y-M.; Iannello,P.; Caldwell,N.; Leang,S-Y; Komadina,N.
EPI302086	HA	India	2010-Sep-06	B/India/6613/2010	National Institute of Virology	Centers for Disease Control and Prevention
EPI302079	HA	Bolivia, Plurinationial State of	2010-Jan-01	B/Bolivia/1526/2010		Centers for Disease Control and Prevention
EPI302028	HA	Micronesia, Federated States of	2010-Oct-01	B/Micronesia/5613/2010	State of Hawaii Department of Health	Centers for Disease Control and Prevention
EPI301987	HA	United States	2010-Jan-01	B/Georgia/07/2010	Georgia Public Health Laboratory	Centers for Disease Control and Prevention
EPI301959	HA	United States	2011-Jan-03	B/California/01/2011	Naval Health Research Center	Centers for Disease Control and Prevention
EPI301943	HA	United States	2010-Dec-09	B/Alaska/01/2010	Alaska State Virology Lab	Centers for Disease Control and Prevention
EPI301385	HA	Sweden	2010-Dec-12	B/Stockholm/9/2010	Swedish Institute for Infectious Disease Control	Swedish Institute for Infectious Disease Control
EPI301332	HA	Argentina	2010-Jan-01	B/Argentina/R151/2010	Instituto Nacional de Enfermedades Infecciosas	National Institute for Medical Research
EPI301328	HA	Iran, Islamic Republic of	2010-Nov-01	B/Tehran/5277/2010	Tehran University of Medical Sciences	National Institute for Medical Research
EPI301322	HA	Switzerland	2010-Feb-08	B/Switzerland/2843262/2010	Hopital Cantonal Universitaire de Geneves	National Institute for Medical Research
EPI301220	HA	United States	2010-Oct-19	B/Texas/07/2010	Texas Department of State Health Services-Laboratory Services	Centers for Disease Control and Prevention
EPI301196	HA	United States	2010-Jan-01	B/Georgia/07/2010	Georgia Public Health Laboratory	Centers for Disease Control and Prevention
EPI301176	HA	United States	2010-Nov-16	B/Indiana/02/2010	Indiana State Department of Health Laboratories	Centers for Disease Control and Prevention
EPI294828	HA	United States	2010-Sep-19	B/Pennsylvania/13/2010	Pennsylvania Department of Health	Centers for Disease Control and Prevention
EPI294813	HA	United States	2010-Oct-18	B/Mississippi/03/2010	Mississippi Public Health Laboratory	Centers for Disease Control and Prevention
EPI294801	HA	Lao, People's Democratic Republic	2010-Sep-14	B/Laos/833/2010	National Center for Laboratory and Epidemiology	Centers for Disease Control and Prevention
EPI294696	HA	Argentina	2010-Jun-16	B/Argentina/159/2010	Instituto Nacional de Enfermedades Infecciosas	Centers for Disease Control and Prevention
EPI294428	HA	New Caledonia	2010-Aug-27	B/NEW CALEDONIA/15/2010	Institut Pasteur New Caledonia	WHO Collaborating Centre for Reference and Research on Influenza	Deng,Y-M; Iannello,P; Caldwell,N; Leang,S-K; Komadina,N.
EPI294350	HA	Australia	2010-Sep-01	B/VICTORIA/506/2010	Monash Medical Centre	WHO Collaborating Centre for Reference and Research on Influenza	Deng,Y-M; Iannello,P; Caldwell,N; Leang,S-K; Komadina,N.
EPI291629	HA	China	2010-Jul-07	B/Chongqing-Yuzhong/1384/2010	WHO Chinese National Influenza Center	Centers for Disease Control and Prevention
EPI291615	HA	Bolivia, Plurinationial State of	2010-Sep-01	B/Bolivia/1470/2010	CENETROP	Centers for Disease Control and Prevention
EPI280400	HA	China	2010-Sep-04	B/Hong Kong/2066/2010	Government Virus Unit	Centers for Disease Control and Prevention
EPI279863	HA	Madagascar	2010-Jan-12	B/Madagascar/82/2010	Institut Pasteur de Madagascar	National Institute for Medical Research
EPI278966	HA	Panama	2010-Jun-22	B/Panama/307237/2010	Instituto Conmemorativo Gorgas de Estudios de la Salud	Centers for Disease Control and Prevention
EPI278952	HA	Hong Kong (SAR)	2010-Jul-11	B/Hong Kong/1863/2010	Government Virus Unit	Centers for Disease Control and Prevention
EPI275329	HA	United States	2010-Jun-11	B/Georgia/01/2010	Georgia Public Health Laboratory	Centers for Disease Control and Prevention
EPI275326	HA	United States	2010-Feb-24	B/North Carolina/01/2010	North Carolina State Laboratory of Public Health	Centers for Disease Control and Prevention
EPI272014	HA	Philippines	2010-Mar-24	B/PHILIPPINES/1400/2010	Research Institute of Tropical Medicine	WHO Collaborating Centre for Reference and Research on Influenza	Deng,Y-M.; Iannello,P.; Caldwell,N.; Leang,S-K.; Komadina,N.
EPI271885	HA	Italy	2010-Mar-23	B/Milano/21/2010	Istituto Superiore di Sanità	National Institute for Medical Research
EPI271875	HA	Italy	2010-Mar-09	B/Milano/2/2010	Istituto Superiore di Sanità	National Institute for Medical Research
EPI271641	HA	Taiwan	2010-Apr-01	B/Taiwan/31/2010	ADImmune Corporation	Centers for Disease Control and Prevention
EPI247586	HA	Bangladesh	2009-Nov-01	B/Bangladesh/9673/2009	Institute of Epidemiology Disease Control and Research (IEDCR) & Bangladesh National Influenza Centre (NIC)	Centers for Disease Control and Prevention
EPI242867	HA	United States	1959-Jan-04	B/Maryland/59		Other Database Import	Krystal,M.; Young,J.F.; Palese,P.; Wilson,I.A.; Skehel,J.J.; Wiley,D.C.
EPI241211	HA	United States	2008-Dec-29	B/New Jersey/11/2008		Centers for Disease Control and Prevention
EPI237646	HA	Sweden	2009-Nov-27	B/Stockholm/8/2009	Swedish Institute for Infectious Disease Control	Swedish Institute for Infectious Disease Control
EPI211753	HA	Australia	2009-May-27	B/PERTH/31/2009	Pathwest QE II Medical Centre	WHO Collaborating Centre for Reference and Research on Influenza	Deng,Y; Iannello,P.; Ernest,J.; Caldwell,N; Komadina,N.
EPI210302	HA	Australia	2009-May-05	B/SYDNEY/3/2009	Clinical Virology Unit, CDIM	WHO Collaborating Centre for Reference and Research on Influenza
EPI210301	HA	Fiji	2009-May-02	B/FIJI/1/2009	National Centre for Scientific Services for Virology and Vector Borne Diseases	WHO Collaborating Centre for Reference and Research on Influenza
EPI210300	HA	Malaysia	2009-May-19	B/MALAYSIA/947/2009	Institut Penyelidikan Perubatan	WHO Collaborating Centre for Reference and Research on Influenza
EPI193088	HA	Vietnam	2009-Apr-07	B/Vietnam/132/2009	National Institute of Hygiene and Epidemiology	Centers for Disease Control and Prevention
EPI193086	HA	Guatemala	2009-Jul-24	B/Guatemala/09/2009	Laboratorio Nacional De Salud Guatemala	Centers for Disease Control and Prevention
EPI187613	HA	United States	2009-Apr-08	B/Texas/10/2009	Texas Childrens Hospital	Centers for Disease Control and Prevention
EPI187579	HA	United States	2009-Apr-02	B/Montana/02/2009	Montana Public Health Laboratory	Centers for Disease Control and Prevention
EPI187568	HA	United States	2009-Apr-23	B/Minnesota/05/2009	Minnesota Department of Health	Centers for Disease Control and Prevention
EPI187566	HA	United States	2009-Apr-16	B/Minnesota/04/2009	Minnesota Department of Health	Centers for Disease Control and Prevention
EPI187515	HA	United States	2009-Mar-31	B/Hawaii/04/2009	State of Hawaii Department of Health	Centers for Disease Control and Prevention
EPI187513	HA	United States	2009-Mar-30	B/Hawaii/03/2009	State of Hawaii Department of Health	Centers for Disease Control and Prevention
EPI187511	HA	United States	2009-Mar-26	B/Hawaii/02/2009	State of Hawaii Department of Health	Centers for Disease Control and Prevention
EPI187509	HA	China	2009-Feb-01	B/Fujian-Siming/118/2009	WHO Chinese National Influenza Center	Centers for Disease Control and Prevention
EPI176419	HA	United States	2009-Feb-03	B/South Carolina/02/2009	South Carolina Department of Health	Centers for Disease Control and Prevention
EPI176410	HA	United States	2009-Jan-15	B/Texas/02/2009	Texas Childrens Hospital	Centers for Disease Control and Prevention
EPI176407	HA	United States	2009-Jan-15	B/Montana/01/2009	Montana Public Health Laboratory	Centers for Disease Control and Prevention
EPI176356	HA	United States	2008-Oct-27	B/Florida/10/2008		Centers for Disease Control and Prevention
EPI175795	HA	Nicaragua	2008-May-27	B/Managua/4847.02/2008		Other Database Import
EPI175755	HA	Malaysia	2004-Jan-01	B/Malaysia/2506/2004		Other Database Import
EPI175739	HA	Taiwan	2007-Jan-12	B/Taiwan/37/2007		Other Database Import
EPI174796	HA	Singapore	2008-Nov-11	B/Singapore/081/2008	Singapore General Hospital	WHO Collaborating Centre for Reference and Research on Influenza
EPI174786	HA	Australia	2008-Jul-01	B/Sydney/58/2008	Westmead Hospital	WHO Collaborating Centre for Reference and Research on Influenza
EPI173872	HA	United States	2007-Mar-05	B/Illinois/UR06-0516/2007		Other Database Import
EPI173250	HA	Philippines	2008-Nov-25	B/Philippines/7363/2008	Research Institute of Tropical Medicine	WHO Collaborating Centre for Reference and Research on Influenza
EPI173234	HA	Australia	2008-Aug-11	B/Sydney/524/2008	Westmead Hospital	WHO Collaborating Centre for Reference and Research on Influenza
EPI172571	HA	China	2008-Oct-31	B/Hubei/Songzi326/2008		Centers for Disease Control and Prevention
EPI172539	HA	United States	2008-Aug-18	B/Mississippi/04/2008		Centers for Disease Control and Prevention
EPI172490	HA	United States	2008-Nov-24	B/Texas/26/2008		Centers for Disease Control and Prevention
EPI172484	HA	Brazil	2008-Jul-25	B/Brazil/5935/2008		Centers for Disease Control and Prevention
EPI172336	HA	Philippines	2008-May-19	B/Philippines/846/2008	Research Institute of Tropical Medicine	WHO Collaborating Centre for Reference and Research on Influenza
EPI171423	HA	United States	2008-Nov-25	B/Florida/18/2008		Centers for Disease Control and Prevention
EPI171422	HA	United States	2008-Dec-10	B/Florida/16/2008		Centers for Disease Control and Prevention
EPI171421	HA	United States	2008-Nov-18	B/Florida/14/2008		Centers for Disease Control and Prevention
EPI171409	HA	Costa Rica	2008-Oct-27	B/Costa Rica/0123/2008		Centers for Disease Control and Prevention
EPI169261	HA	United States	2008-Oct-12	B/Hawaii/06/2008		Centers for Disease Control and Prevention
EPI169255	HA	United States	2008-Oct-23	B/Wisconsin/25/2008		Centers for Disease Control and Prevention
EPI168185	HA	United States	2008-Sep-15	B/California/03/2008		Centers for Disease Control and Prevention
EPI168179	HA	Nicaragua	2008-Jun-06	B/Nicaragua/2028/2008		Centers for Disease Control and Prevention
EPI168170	HA	United States	2008-Apr-12	B/Hawaii/05/2008		Centers for Disease Control and Prevention
EPI168165	HA	Brazil	2008-Jul-28	B/Brazil/2937/2008		Centers for Disease Control and Prevention
EPI168145	HA	United States	2008-Feb-29	B/Washington/01/2008		Centers for Disease Control and Prevention
EPI163726	HA	Australia	2008-Jul-13	B/Brisbane/33/2008	Queensland Health Scientific Services	WHO Collaborating Centre for Reference and Research on Influenza
EPI161965	HA	China	2008-Feb-09	B/Hong Kong/125/2008		Centers for Disease Control and Prevention
EPI161959	HA	China	2008-Feb-09	B/Hong Kong/119/2008		Centers for Disease Control and Prevention
EPI161834	HA	Australia	2008-Jan-15	B/Brisbane/01/2008		Centers for Disease Control and Prevention
EPI161774	HA	Chile	2008-Jan-01	B/Santiago/5241/2008		Centers for Disease Control and Prevention
EPI161762	HA	Thailand	2008-Mar-17	B/Thailand/393/2008		Centers for Disease Control and Prevention
EPI161751	HA	China	2008-Feb-09	B/Hong Kong/129/2008		Centers for Disease Control and Prevention
EPI160370	HA	United States	2008-Apr-10	B/Nebraska/02/2008		Centers for Disease Control and Prevention
EPI159978	HA	United States	2006-Jan-01	B/Florida/4/2006		Other Database Import
EPI157247	HA	China	2007-Jul-02	B/Tianjin/Jinnan174/2007		Centers for Disease Control and Prevention
EPI163161	HA	China	2007-Oct-23	B/Tianjin/Dagang36/2007		Centers for Disease Control and Prevention
EPI157227	HA	Thailand	2007-Sep-14	B/Thailand/264/2007		Centers for Disease Control and Prevention
EPI138739	HA	United States	2007-Dec-24	B/New York/11/2007		Centers for Disease Control and Prevention
EPI134370	HA	United States	2007-Mar-15	B/Pennsylvania/07/2007		Centers for Disease Control and Prevention
EPI56011	HA	Japan	1998-Jan-01	B/Yamanashi/166/98		Other Database Import
EPI55954	HA	United States	2001-May-09	B/Hawaii/10/2001		Other Database Import
EPI51630	HA	Hong Kong (SAR)	2002-Jan-18	B/Hong Kong/1434/2002		Other Database Import
EPI156850	HA	New Zealand	2008-May-23	B/Waikato/2/2008	Institute of Environmental Science & Research	WHO Collaborating Centre for Reference and Research on Influenza
EPI156164	HA	United States	2008-Mar-10	B/Minnesota/04/2008		Centers for Disease Control and Prevention
EPI156079	HA	Malaysia	2008-Jan-29	B/Malaysia/416/2008	Institut Penyelidikan Perubatan	WHO Collaborating Centre for Reference and Research on Influenza
EPI155972	HA	China	2007-Jun-10	B/Tianjin/Hedong1141/2007		Centers for Disease Control and Prevention
EPI155892	HA	Egypt	2007-May-26	B/Egypt/4179/2007		Centers for Disease Control and Prevention
EPI155790	HA	China	2007-Jan-10	B/Shaanxi/Weicheng159/2007		Centers for Disease Control and Prevention
EPI155750	HA	Chile	2007-May-11	B/Santiago/6495/2007		Centers for Disease Control and Prevention
EPI155732	HA	Kazakhstan	2007-Feb-15	B/Kazakhstan/1946/2007		Centers for Disease Control and Prevention
EPI155620	HA	China	2007-Jan-10	B/Chongqing/Yuzhong18/2007		Centers for Disease Control and Prevention
EPI155618	HA	China	2007-Jan-10	B/Chongqing/Yuzhong111/2007		Centers for Disease Control and Prevention
EPI155556	HA	Russian Federation	2007-Apr-02	B/Khabarovsk/26/2007		Centers for Disease Control and Prevention
EPI155554	HA	Russian Federation	2007-Apr-09	B/Khabarovsk/06/2007		Centers for Disease Control and Prevention
EPI154271	HA	United States	2008-Feb-13	B/North Dakota/02/2008		Centers for Disease Control and Prevention
EPI154267	HA	United States	2008-Feb-03	B/West Virginia/01/2008		Centers for Disease Control and Prevention
EPI154265	HA	United States	2008-Feb-18	B/Oklahoma/02/2008		Centers for Disease Control and Prevention
EPI154246	HA	United States	2008-Jan-29	B/Wisconsin/07/2008		Centers for Disease Control and Prevention
EPI154232	HA	United States	2008-Jan-15	B/Louisiana/01/2008		Centers for Disease Control and Prevention
EPI154218	HA	United States	2007-Dec-31	B/New Mexico/05/2007		Centers for Disease Control and Prevention
EPI137547	HA	United States	2006-Nov-15	B/Florida/UR06-0002/2006		Other Database Import
EPI137099	HA	United States	2007-Feb-26	B/Tennessee/UR06-0431/2007		Other Database Import
EPI134398	HA	United States	2007-Mar-26	B/New York/02/2007		Centers for Disease Control and Prevention
EPI134346	HA	United States	2007-Apr-06	B/Michigan/14/2007		Centers for Disease Control and Prevention
EPI134308	HA	United States	2007-Nov-09	B/Oklahoma/02/2007		Centers for Disease Control and Prevention
EPI134364	HA	United States	2007-Mar-23	B/Pennsylvania/10/2007		Centers for Disease Control and Prevention
EPI133714	HA	United States	2007-Oct-29	B/California/13/2007		Centers for Disease Control and Prevention
EPI128595	HA	Hong Kong (SAR)	1973-Jan-01	B/Hong Kong/8/1973		Other Database Import
EPI129451	HA	Hong Kong (SAR)	1973-Jan-01	B/Hong Kong/8/1973		Other Database Import
EPI62295	HA	United States	1995-Feb-16	B/California/02/1995		Other Database Import
EPI56334	HA	United States	1993-Dec-08	B/New York/24/1993		Other Database Import
EPI55807	HA	United States	1997-Feb-10	B/Houston/B58/1997		Other Database Import
EPI52048	HA	Hong Kong (SAR)	2002-Jan-17	B/Hong Kong/1351/02		Other Database Import
EPI52010	HA	United States	1995-Jan-01	B/California/01/1995		Other Database Import
EPI51592	HA	Hong Kong (SAR)	2002-Jan-03	B/Hong Kong/167/2002		Other Database Import
EPI51497	HA	Hong Kong (SAR)	2001-Jan-08	B/Hong Kong/06/2001		Other Database Import
EPI51326	HA	Japan	1997-Jan-01	B/Osaka/547/1997		Other Database Import
EPI50871	HA	United States	2006-Jan-09	B/Florida/02/2006		Other Database Import
EPI50814	HA	United States	2005-Jan-12	B/Houston/B850/2005		Other Database Import
EPI50510	HA	United States	2003-Jan-01	B/Temple/B19/2003		Other Database Import
EPI20746	HA	China	1998-Jan-01	B/Nanchang/12/98		Other Database Import
EPI20728	HA	China	1995-Jan-01	B/Nanchang/15/95		Other Database Import
EPI20722	HA	China	1994-Jan-01	B/Nanchang/560/94		Other Database Import
EPI9030	HA	Hong Kong (SAR)	1999-Jan-01	B/Hong Kong/157/99		Other Database Import
EPI9032	HA	Hong Kong (SAR)	1999-Jan-01	B/Hong Kong/157/99		Other Database Import
EPI556775	HA	United States	2014-Jan-01	B/Utah/09/2014 BX-55	New York Medical College	Centers for Disease Control and Prevention
EPI516490	HA	United States	2013-Jan-01	B/Texas/02/2013-CDC-LV8B	Centers for Disease Control and Prevention	Centers for Disease Control and Prevention	Bousse, Tatiana; Shcheirbik, Svetlana; Pearce, Nicholas
EPI366716	HA	United States	2012-Jan-01	B/reassortant/NYMC BX-38-1P-1		Other Database Import	Wentworth,D.E.; Dugan,V.; Halpin,R.; Lin,X.; Bera,J.; Ghedin,E.; Fedorova,N.; Overton,L.; Tsitrin,T.; Stockwell,T.; Amedeo,P.; Bishop,B.; Chen,H.; Edworthy,P.; Gupta,N.; Katzel,D.; Li,K.; Schobel,S.; Shrivastava,S.; Thovarai,V.; Wang,S.; Ramanunninair,M.; Silverman,J.; Devis,R.; Phan,L.; Le,J.; Pokorny,B.A.; Onodera,S.; Fulvini,A.A.; He,Y.; Kilbourne,E.D.; Bucher,D.; Bao,Y.; Sanders,R.; Dernovoy,…
EPI366708	HA	United States	2012-Jan-01	B/reassortant/NYMC BX-43B		Other Database Import	Wentworth,D.E.; Dugan,V.; Halpin,R.; Lin,X.; Bera,J.; Ghedin,E.; Fedorova,N.; Overton,L.; Tsitrin,T.; Stockwell,T.; Amedeo,P.; Bishop,B.; Chen,H.; Edworthy,P.; Gupta,N.; Katzel,D.; Li,K.; Schobel,S.; Shrivastava,S.; Thovarai,V.; Wang,S.; Ramanunninair,M.; Silverman,J.; Devis,R.; Phan,L.; Le,J.; Pokorny,B.A.; Onodera,S.; Fulvini,A.A.; He,Y.; Kilbourne,E.D.; Bucher,D.; Bao,Y.; Sanders,R.; Dernovoy,…
EPI366494	HA	United States	2012-Jan-01	B/reassortant/NYMC BX-43		Other Database Import	Wentworth,D.E.; Dugan,V.; Halpin,R.; Lin,X.; Bera,J.; Ghedin,E.; Fedorova,N.; Overton,L.; Tsitrin,T.; Stockwell,T.; Amedeo,P.; Bishop,B.; Chen,H.; Edworthy,P.; Gupta,N.; Katzel,D.; Li,K.; Schobel,S.; Shrivastava,S.; Thovarai,V.; Wang,S.; Ramanunninair,M.; Silverman,J.; Devis,R.; Phan,L.; Le,J.; Pokorny,B.A.; Onodera,S.; Fulvini,A.A.; He,Y.; Kilbourne,E.D.; Bucher,D.; Bao,Y.; Sanders,R.; Dernovoy,…
EPI358088	HA	United States	2011-Jan-01	B/Nevada/03/2011 BX-47A	New York Medical College	Centers for Disease Control and Prevention
EPI328916	HA	United States	2010-Jan-01	B/Wisconsin/01/2010 BX-41		Centers for Disease Control and Prevention
EPI244699	HA	Australia	2009-Jan-01	B/Brisbane/60/2008 BX-31	New York Medical College	Centers for Disease Control and Prevention
EPI242828	HA	United States	2008-Jan-01	B/NYMC BX-5A(Lee/1940-Jilin/20/2003)		Other Database Import	The NIAID Influenza Genome Sequencing Consortium
EPI13613	HA	China	2003-Jan-01	B/Jiangsu/10/03		Other Database Import
EPI159946	HA	China	2003-Jan-01	B/Jiangsu/10/03		Other Database Import
EPI630993	HA	United States	2015-May-09	B/Utah/34/2015	Utah Department of Health	Centers for Disease Control and Prevention
EPI630932	HA	United States	2015-May-12	B/Idaho/17/2015	State of Idaho Bureau of Laboratories	Centers for Disease Control and Prevention
EPI630924	HA	United States	2015-May-19	B/Nevada/19/2015	Southern Nevada Public Health Lab	Centers for Disease Control and Prevention
EPI630517	HA	Lao, People's Democratic Republic	2015-May-13	B/Laos/O305/2015	Ministry of Health Laos	National Institute of Infectious Diseases (NIID)	Takashita,Emi; Fujisaki,Seiichiro; Shirakura,Masayuki; Watanabe,Shinji; Odagiri,Takato
EPI630491	HA	Taiwan	2015-Feb-22	B/Taiwan/24/2015	Center for Disease Control	National Institute of Infectious Diseases (NIID)	Takashita,Emi; Fujisaki,Seiichiro; Shirakura,Masayuki; Watanabe,Shinji; Odagiri,Takato
EPI630359	HA	Norway	2015-Jun-23	B/Norway/2539/2015		Norwegian Institute of Public Health	Bragstad K, Dudman SG, Waalen K, Hungnes O
EPI630361	HA	Norway	2015-Jun-24	B/Norway/2545/2015	Innlandet Hospital Trust, Division Lillehammer, Department for Microbiology	Norwegian Institute of Public Health	Bragstad, K; Dudman, SG; Waalen, K; Hungnes, O
EPI630358	HA	Norway	2015-Jun-22	B/Norway/2538/2015	Sorlandet Sykehus HF, Dept. of Medical Microbiology	Norwegian Institute of Public Health	Bragstad, K; Dudman, SG; Waalen, K; Hungnes, O
EPI630343	HA	Norway	2015-Mar-06	B/Norway/1570/2015	Health Forde, Department of Microbiology	Norwegian Institute of Public Health	Bragstad, K; Dudman, SG; Waalen, K; Hungnes, O
EPI630196	HA	Brazil	2015-Jul-01	B/Mato Grosso/57643/2015	Instituto Adolfo Lutz	Instituto Adolfo Lutz	Santos,Katia;Silva,Daniela;Benega,Margarete;Paulino,Renato;Santos,Cecilia;Paiva,Terezinha
EPI629512	HA	Russian Federation	2015-Feb-06	B/Rostov-On-Don/02/2015	Russian Academy of Medical Sciences	Centers for Disease Control and Prevention
EPI629480	HA	Peru	2015-May-13	B/Peru/20/2015	US NAMRU-6	Centers for Disease Control and Prevention
EPI629065	HA	United States	2015-Mar-14	B/Maryland/12/2015	Maryland Department of Health and Mental Hygiene	Centers for Disease Control and Prevention
EPI629059	HA	United States	2015-Mar-14	B/Maryland/12/2015	Maryland Department of Health and Mental Hygiene	Centers for Disease Control and Prevention
EPI628874	HA	Japan	2015-Apr-16	B/WAKAYAMA/72/2015	Wakayama Prefectural Research Center of Environment and Public Health	National Institute of Infectious Diseases (NIID)	Takashita,Emi; Fujisaki,Seiichiro; Shirakura,Masayuki; Watanabe,Shinji; Odagiri,Takato
EPI628840	HA	Brazil	2015-Jun-11	B/Sao Paulo/53930/2015	Instituto Adolfo Lutz	Instituto Adolfo Lutz	Santos,Katia;Silva,Daniela;Benega,Margarete;Paulino,Renato;Santos,Cecilia;Paiva,Terezinha
EPI625793	HA	Ukraine	2015-Feb-02	B/Odessa/233/2015	Institute of Epidemiology and Infectious Diseases AMS of Ukraine	Centers for Disease Control and Prevention
EPI624854	HA	Madagascar	2015-Mar-24	B/Tsaralalana/1283/2015	Institut Pasteur de Madagascar	National Institute for Medical Research
EPI624796	HA	Slovakia	2015-Feb-18	B/Michalovce/587/2015	National Public Health Institute of Slovakia	National Institute for Medical Research
EPI624764	HA	Madagascar	2015-Mar-16	B/Antsirabe/1037/2015	Institut Pasteur de Madagascar	National Institute for Medical Research
EPI624484	HA	Mongolia	2015-Mar-15	B/Choibalsan/1803/2015	National Center for Communicable Diseases	National Institute of Infectious Diseases (NIID)	Takashita,Emi; Fujisaki,Seiichiro; Shirakura,Masayuki; Watanabe,Shinji; Odagiri,Takato
EPI623896	HA	France	2015-Mar-18	B/Champagne Ardenne/1563/2015	Institut Pasteur	Institut Pasteur
EPI623777	HA	Denmark	2015-Mar-16	B/Denmark/06/2015		Statens Serum Institute	Trebbien,Ramona
EPI622447	HA	China	2014-Oct-12	B/Shanghai-Pudongxin/11568/2014	WHO Chinese National Influenza Center	WHO Chinese National Influenza Center	Yu Lan,Xiyan Li,Xiang Zhao,Yanhui Cheng,minju Tan,Weijuan Huang,Dayan Wang,Dexin Li,Yuelong Shu
EPI621993	HA	Ukraine	2015-Mar-03	B/Zaporizza/339/2015	Institute of Epidemiology and Infectious Diseases AMS of Ukraine	National Institute for Medical Research
EPI621983	HA	Ukraine	2015-Mar-29	B/Ukraine/6790/2015	Ministry of Health of Ukraine	National Institute for Medical Research
EPI621969	HA	Ukraine	2015-Mar-04	B/Ukraine/6458/2015	Ministry of Health of Ukraine	National Institute for Medical Research
EPI621929	HA	Spain	2015-Feb-13	B/Salamanca/232/2015	Universidad de Valladolid	National Institute for Medical Research
EPI621889	HA	Romania	2015-Mar-11	B/Constanta/179082/2015	Cantacuzino Institute	National Institute for Medical Research
EPI621527	HA	Lao, People's Democratic Republic	2015-Jan-05	B/Laos/I033/2015	Ministry of Health Laos	National Institute of Infectious Diseases (NIID)	Takashita,Emi; Fujisaki,Seiichiro; Shirakura,Masayuki; Watanabe,Shinji; Odagiri,Takato
EPI619068	HA	Japan	2015-Apr-03	B/FUKUSHIMA/24/2015	Fukushima Prefectural Institute of Public Health	National Institute of Infectious Diseases (NIID)	Takashita,Emi; Fujisaki,Seiichiro; Shirakura,Masayuki; Watanabe,Shinji; Odagiri,Takato
EPI625881	HA	United States	2015-Feb-17	B/South Carolina/05/2015	South Carolina Department of Health	Centers for Disease Control and Prevention
EPI621459	HA	United States	2015-Mar-26	B/Indiana/17/2015	Indiana State Department of Health Laboratories	Centers for Disease Control and Prevention
EPI610396	HA	Thailand	2012-Oct-01	B/Thailand/VIROAF3CS/2012		Other Database Import	Rutvisuttinunt,W.; Chinnawirotpisan,P.; Thaisomboonsuk,B.; Rodpradit,P.; Ajariyakhajorn,C.; Manasatienkij,W.; Simasathien,S.; Shrestha,S.K.; Yoon,I.-K.; Klungthong,C.; Fernandez,S.
EPI608954	HA	Japan	2015-Mar-12	B/SAKAI/2/2015	Sakai City Institute of Public Health	National Institute of Infectious Diseases (NIID)	Takashita,Emi; Fujisaki,Seiichiro; Shirakura,Masayuki; Watanabe,Shinji; Odagiri,Takato
EPI608952	HA	Japan	2015-Feb-03	B/SAITAMA-C/2/2015	Saitama City Institute of Health Science and Research	National Institute of Infectious Diseases (NIID)	Takashita,Emi; Fujisaki,Seiichiro; Shirakura,Masayuki; Watanabe,Shinji; Odagiri,Takato
EPI603507	HA	United States	2015-Apr-13	B/Utah/15/2015	Utah Department of Health	Centers for Disease Control and Prevention
EPI603389	HA	United States	2015-Apr-12	B/Delaware/02/2015	Delaware Public Health Lab	Centers for Disease Control and Prevention
EPI603230	HA	United States	2015-Mar-31	B/Texas/49/2015	Texas Department of State Health Services-Laboratory Services	Centers for Disease Control and Prevention
EPI598371	HA	Jordan	2015-Jan-26	B/Jordan/20114/2015	Laboratory Directorate	National Institute for Medical Research
EPI592671	HA	United States	2015-Apr-21	B/Alaska/08/2015	Alaska State Virology Lab	Centers for Disease Control and Prevention
EPI589460	HA	Jordan	2015-Mar-20	B/Jordan/20237/2015	Laboratory Directorate	National Institute for Medical Research
EPI589434	HA	Georgia	2015-Jan-06	B/Georgia/20/2015	National Centre for Disease Control and Public Health	National Institute for Medical Research
EPI589408	HA	Bulgaria	2015-Feb-13	B/Bulgaria/351/2015	National Centre of Infectious and	National Institute for Medical Research
EPI589323	HA	Japan	2015-Jan-22	B/TOYAMA/3/2015	Toyama Institute of Health	National Institute of Infectious Diseases (NIID)	Takashita,Emi; Fujisaki,Seiichiro; Shirakura,Masayuki; Watanabe,Shinji; Odagiri,Takato
EPI587371	HA	United States	2015-Mar-04	B/Montana/05/2015	Montana Laboratory Services Bureau	Centers for Disease Control and Prevention
EPI587259	HA	United States	2015-Mar-17	B/Texas/20/2015	Texas Department of State Health Services-Laboratory Services	Centers for Disease Control and Prevention
EPI586994	HA	United States	2015-Jan-28	B/Colorado/01/2015	Colorado Department of Health Lab	Centers for Disease Control and Prevention
EPI586809	HA	United States	2015-Feb-12	B/Washington/03/2015	Marshfield Clinic Research Foundation	Centers for Disease Control and Prevention
EPI586777	HA	United States	2015-Jan-17	B/Wisconsin/03/2015	Wisconsin State Laboratory of Hygiene	Centers for Disease Control and Prevention
EPI586769	HA	United States	2015-Mar-09	B/California/09/2015	California Department of Health Services	Centers for Disease Control and Prevention
EPI586756	HA	United States	2015-Mar-08	B/Idaho/07/2015	State of Idaho Bureau of Laboratories	Centers for Disease Control and Prevention
EPI586705	HA	United States	2015-Mar-10	B/Arkansas/12/2015	Arkansas Department of Health	Centers for Disease Control and Prevention
EPI586476	HA	Brazil	2015-Mar-19	B/Distrito Federal/32366/2015	Instituto Adolfo Lutz	Instituto Adolfo Lutz	Santos,Katia;Silva,Daniela;Benega,Margarete;Paulino,Renato;Santos,Cecilia;Paiva,Terezinha
EPI586458	HA	China	2014-Dec-22	B/Shaanxi-Beilin/11885/2014	WHO Chinese National Influenza Center	WHO Chinese National Influenza Center	Xiaoxu Zeng,Xiyan Li,Xiang Zhao,Yanhui Cheng,minju Tan,Weijuan Huang,Dayan Wang,Dexin Li,Yuelong Shu
EPI582901	HA	United States	2015-Feb-19	B/Illinois/02/2015	Illinois Department of Public Health-Chicago	Centers for Disease Control and Prevention
EPI625832	HA	United States	2015-Feb-18	B/Vermont/02/2015	Vermont Department of Health Laboratory	Centers for Disease Control and Prevention
EPI625823	HA	United States	2015-Feb-10	B/New York/09/2015	New York State Department of Health	Centers for Disease Control and Prevention
EPI582745	HA	United States	2015-Mar-07	B/California/03/2015	California Department of Health Services	Centers for Disease Control and Prevention
EPI582726	HA	United States	2015-Feb-24	B/Ohio/02/2015	Ohio Department of Health Laboratories	Centers for Disease Control and Prevention
EPI582599	HA	United States	2015-Feb-18	B/Arkansas/08/2015	Arkansas Department of Health	Centers for Disease Control and Prevention
EPI582494	HA	United States	2015-Feb-23	B/Vermont/03/2015	Vermont Department of Health Laboratory	Centers for Disease Control and Prevention
EPI582490	HA	United States	2015-Mar-04	B/North Carolina/04/2015	North Carolina State Laboratory of Public Health	Centers for Disease Control and Prevention
EPI582482	HA	United States	2015-Mar-06	B/Florida/10/2015	Florida Department of Health-Jacksonville	Centers for Disease Control and Prevention
EPI582455	HA	United States	2015-Mar-09	B/Alabama/04/2015	ADPH Bureau of Clinical Laboratories	Centers for Disease Control and Prevention
EPI582242	HA	Sweden	2015-Mar-11	B/Sweden/13/2015		Swedish Institute for Infectious Disease Control
EPI581826	HA	Japan	2015-Jan-06	B/NIIGATA/28/2015	Niigata Prefectural Institute of Public Health and Environmental Sciences	National Institute of Infectious Diseases (NIID)	Takashita,Emi; Fujisaki,Seiichiro; Shirakura,Masayuki; Watanabe,Shinji; Odagiri,Takato
EPI581453	HA	Japan	2014-Mar-15	B/Gunma/13G026/2014		Other Database Import	Hibino,A.; Saito,R.; Shoubugawa,Y.; Kondo,H.; Saito,T.; Takemae,N.; Kawashima,T.
EPI581138	HA	Japan	2014-Mar-17	B/Niigata/13F498/2014		Other Database Import	Hibino,A.; Saito,R.; Shoubugawa,Y.; Kondo,H.; Saito,T.; Takemae,N.; Sato,I.
EPI589064	HA	India	2013-Feb-04	B/Haryana/Y42/2013		Other Database Import	Kumar,S.; Khare,S.; Saidullah,B.; Rai,A.
EPI589055	HA	India	2012-Oct-02	B/Delhi/Y33/2012		Other Database Import	Kumar,S.; Khare,S.; Saidullah,B.; Rai,A.
EPI580451	HA	Vietnam	2012-Nov-23	B/Vietnam/13V B-1/2012		Niigata University	Saito, Reiko; Takemae, Nobuhiro; Saito, Takehiko; Shobugawa, Yugo; Kondo, Hiroki; Hibino, Akinobu
EPI575986	HA	France	2015-Jan-21	B/Pays de Loire/497/2015	Institut Pasteur	Institut Pasteur
EPI574840	HA	Iran, Islamic Republic of	2014-Sep-25	B/Tehran/69425/2014	Tehran University of Medical Sciences	National Institute for Medical Research
EPI574766	HA	Ghana	2014-Sep-10	B/Ghana/DILI-14-0818/2014	University of Ghana	National Institute for Medical Research
EPI574113	HA	France	2014-Dec-12	B/Paris/2293/2014	Institut Pasteur	Institut Pasteur	S, Behillil
EPI569775	HA	Lao, People's Democratic Republic	2014-Oct-15	B/Laos/I1078/2014	Ministry of Health Laos	National Institute of Infectious Diseases (NIID)	Takashita,Emi; Fujisaki,Seiichiro; Shirakura,Masayuki; Watanabe,Shinji; Odagiri,Takato
EPI569771	HA	Lao, People's Democratic Republic	2014-Oct-08	B/Laos/I1043/2014	Ministry of Health Laos	National Institute of Infectious Diseases (NIID)	Takashita,Emi; Fujisaki,Seiichiro; Shirakura,Masayuki; Watanabe,Shinji; Odagiri,Takato
EPI569242	HA	United States	2015-Jan-28	B/Wyoming/01/2015	Wyoming Public Health Laboratory	Centers for Disease Control and Prevention
EPI569176	HA	United States	2015-Jan-24	B/Utah/01/2015	Utah Department of Health	Centers for Disease Control and Prevention
EPI569157	HA	United States	2014-Dec-15	B/Texas/34/2014	Texas Department of State Health Services, South Texas Laboratory	Centers for Disease Control and Prevention
EPI569128	HA	Chile	2014-Nov-08	B/Santiago/73755/2014	Instituto de Salud Publica de Chile	Centers for Disease Control and Prevention
EPI569068	HA	United States	2014-Dec-31	B/North Dakota/05/2014	North Dakota Department of Health	Centers for Disease Control and Prevention
EPI569050	HA	United States	2015-Jan-19	B/New York/01/2015	New York State Department of Health	Centers for Disease Control and Prevention
EPI568994	HA	Mexico	2014-Dec-09	B/Mexico/2989/2014	Laboratorio de Virus Respiratorio	Centers for Disease Control and Prevention
EPI566791	HA	Vietnam	2013-Aug-30	B/Vietnam/13V B-4/2013		Niigata University	Saito, Reiko; Takemae, Nobuhiro; Saito, Takehiko; Shobugawa, Yugo; Kondo, Hiroki; Hibino, Akinobu
EPI566496	HA	Australia	2012-Nov-30	B/South Australia/72/2012	Institute of Medical and Veterinary Science (IMVS)	WHO Collaborating Centre for Reference and Research on Influenza	Deng,Y-M.; Iannello,P.; Erenest,J.; Spirason, N.; Komadina,N.
EPI566426	HA	Sweden	2015-Jan-11	B/Stockholm/1/2015		Swedish Institute for Infectious Disease Control
EPI566349	HA	Sweden	2015-Jan-17	B/Stockholm/2/2015		Swedish Institute for Infectious Disease Control
EPI565167	HA	United States	2015-Jan-03	B/Nebraska/01/2015	Nebraska Public Health Lab	Centers for Disease Control and Prevention
EPI565126	HA	Canada	2014-Dec-05	B/Alberta/RV3600/2014	National Microbiology Laboratory, Health Canada	Centers for Disease Control and Prevention
EPI564838	HA	Japan	2014-Dec-27	B/SAPPORO/94/2014	Sapporo City Institute of Public Health	National Institute of Infectious Diseases (NIID)	Takashita,Emi; Fujisaki,Seiichiro; Shirakura,Masayuki; Watanabe,Shinji; Odagiri,Takato
EPI564816	HA	Taiwan	2014-Oct-01	B/Taiwan/446/2014	Center for Disease Control	National Institute of Infectious Diseases (NIID)	Takashita,Emi; Fujisaki,Seiichiro; Shirakura,Masayuki; Watanabe,Shinji; Odagiri,Takato
EPI562798	HA	Brazil	2015-Jan-04	B/Goias/3022/2015	Instituto Adolfo Lutz	Instituto Adolfo Lutz	Santos,Katia;Silva,Daniela;Benega,Margarete;Paulino,Renato;Santos,Cecilia;Paiva,Terezinha
EPI562690	HA	Chile	2014-Oct-06	B/Temuco/66319/2014	Instituto de Salud Publica de Chile	Centers for Disease Control and Prevention
EPI562669	HA	United States	2014-Dec-16	B/North Dakota/03/2014	North Dakota Department of Health	Centers for Disease Control and Prevention
EPI562605	HA	Japan	2014-Jan-28	B/Nagasaki/13I003/2014		Niigata University	Saito, Reiko; Takemae, Nobuhiro; Saito, Takehiko; Shobugawa, Yugo; Kondo, Hiroki; Hibino, Akinobu; Ono, Yasuhiko
EPI562361	HA	Tunisia	2014-Dec-11	B/Tunisia/14192/2014	Hopital Charles Nicolle	National Institute for Medical Research
EPI561906	HA	New Caledonia	2014-Nov-01	B/New Caledonia/6/2014	Institut Pasteur New Caledonia	WHO Collaborating Centre for Reference and Research on Influenza	Deng,Y-M.; Iannello,P.; Spirason,N; Jelley,L.;Lau,H.; Komadina,N.
EPI561897	HA	New Caledonia	2014-Oct-10	B/New Caledonia/3/2014	Institut Pasteur New Caledonia	WHO Collaborating Centre for Reference and Research on Influenza	Deng,Y-M.; Iannello,P.; Spirason,N; Jelley,L.;Lau,H.; Komadina,N.
EPI561882	HA	Australia	2014-Oct-27	B/Brisbane/66/2014	Queensland Health Scientific Services	WHO Collaborating Centre for Reference and Research on Influenza	Deng,Y-M.; Iannello,P.; Spirason,N; Jelley,L.;Lau,H.; Komadina,N.
EPI561876	HA	Australia	2014-Oct-10	B/Brisbane/63/2014	Queensland Health Scientific Services	WHO Collaborating Centre for Reference and Research on Influenza	Deng,Y-M.; Iannello,P.; Spirason,N; Jelley,L.;Lau,H.; Komadina,N.
EPI557964	HA	Ukraine	2014-Dec-20	B/Ukraine/497/2014	Institute of Epidemiology and Infectious Diseases AMS of Ukraine	National Institute for Medical Research
EPI557952	HA	Italy	2014-Dec-20	B/Roma/3/2014	Istituto Superiore di Sanità	National Institute for Medical Research
EPI557940	HA	Portugal	2014-Nov-20	B/Lisboa/6/2014	Instituto Nacional de Saude	National Institute for Medical Research
EPI557920	HA	Italy	2014-Dec-15	B/Italy/FVG/01/2014	Istituto Superiore di Sanità	National Institute for Medical Research
EPI556772	HA	United States	2014-Dec-07	B/Arkansas/04/2014	Arkansas Department of Health	Centers for Disease Control and Prevention
EPI556770	HA	United States	2014-Dec-08	B/Wisconsin/13/2014	Wisconsin State Laboratory of Hygiene	Centers for Disease Control and Prevention
EPI556483	HA	Japan	2014-Dec-08	B/SAKAI/83/2014	Sakai City Institute of Public Health	National Institute of Infectious Diseases (NIID)	Takashita,Emi; Fujisaki,Seiichiro; Shirakura,Masayuki; Watanabe,Shinji; Odagiri,Takato
EPI554835	HA	China	2005-Apr-19	B/Anhui/745/2004	WHO Chinese National Influenza Center	WHO Chinese National Influenza Center	Xiaoxu Zeng,Xiyan Li,Xiang Zhao,Yanhui Cheng,minju Tan,Weijuan Huang,Dayan Wang,Dexin Li,Yuelong Shu
EPI554790	HA	China	2014-Aug-23	B/HK/3702/2014	WHO Chinese National Influenza Center	WHO Chinese National Influenza Center	Xiaoxu Zeng,Xiyan Li,Xiang Zhao,Yanhui Cheng,minju Tan,Weijuan Huang,Dayan Wang,Dexin Li,Yuelong Shu
EPI554615	HA	Colombia	2014-Jul-02	B/Colombia/2995/2014	Instituto Nacional de Salud de Columbia	Centers for Disease Control and Prevention
EPI554564	HA	Japan	2014-Sep-30	B/WAKAYAMA/131/2014	Wakayama Prefectural Research Center of Environment and Public Health	National Institute of Infectious Diseases (NIID)	Takashita,Emi; Fujisaki,Seiichiro; Shirakura,Masayuki; Watanabe,Shinji; Odagiri,Takato
EPI553993	HA	United States	2014-Nov-19	B/Montana/04/2014	Montana Public Health Laboratory	Centers for Disease Control and Prevention
EPI552520	HA	Bangladesh	2014-Sep-22	B/Bangladesh/13/2014	Institute of Epidemiology Disease Control and Research (IEDCR) & Bangladesh National Influenza Centre (NIC)	Centers for Disease Control and Prevention
EPI552503	HA	United States	2014-Sep-24	B/Florida/46/2014	Florida Department of Health-Jacksonville	Centers for Disease Control and Prevention
EPI552464	HA	United States	2014-Sep-17	B/South Carolina/03/2014	South Carolina Department of Health	Centers for Disease Control and Prevention
EPI552456	HA	United States	2014-Oct-18	B/Iowa/13/2014	Iowa State Hygienic Laboratory	Centers for Disease Control and Prevention
EPI552063	HA	Brazil	2014-Oct-20	B/Sao Paulo/84600/2014	Instituto Adolfo Lutz	Instituto Adolfo Lutz	Santos,Katia;Silva,Daniela;Benega,Margarete;Paulino,Renato;Santos,Cecilia;Paiva,Terezinha
EPI552060	HA	Brazil	2014-Nov-10	B/Sao Paulo/6-15904/2014	Instituto Adolfo Lutz	Instituto Adolfo Lutz	Santos,Katia;Silva,Daniela;Benega,Margarete;Paulino,Renato;Santos,Cecilia;Paiva,Terezinha
EPI551908	HA	Brazil	2014-Oct-27	B/Sao Paulo/3-36332/2014	Instituto Adolfo Lutz	Instituto Adolfo Lutz	Santos,Katia;Silva,Daniela;Benega,Margarete;Paulino,Renato;Santos,Cecilia;Paiva,Terezinha
EPI551318	HA	New Zealand	2014-Sep-08	B/SOUTH AUCKLAND/25/2014	Institute of Environmental Science & Research	WHO Collaborating Centre for Reference and Research on Influenza	Deng,Y-M.; Iannello,P.; Spirason,N.; Jelley,L.; Lau,H.; Komadina,N.
EPI551286	HA	Australia	2014-Aug-11	B/NEWCASTLE/22/2014	John Hunter Hospital	WHO Collaborating Centre for Reference and Research on Influenza	Deng,Y-M.; Iannello,P.; Spirason,N.; Jelley,L.; Lau,H.; Komadina,N.
EPI551255	HA	New Zealand	2014-Jun-27	B/CHRISTCHURCH/001/2014	Institute of Environmental Science & Research	WHO Collaborating Centre for Reference and Research on Influenza	Deng,Y-M.; Iannello,P.; Spirason,N.; Jelley,L.; Lau,H.; Komadina,N.
EPI551212	HA	United Kingdom	2014-Sep-03	B/ENG/43680729/2014	Microbiology Services Colindale, Public Health England	Microbiology Services Colindale, Public Health England	Galiano,M
EPI551206	HA	United Kingdom	2014-Oct-08	B/ENG/44220028/2014	Microbiology Services Colindale, Public Health England	Microbiology Services Colindale, Public Health England	Galiano,M
EPI551128	HA	China	2014-Sep-05	B/Jiangxi-Xunyang/1689/2014	WHO Chinese National Influenza Center	WHO Chinese National Influenza Center	Xiaoxu Zeng, Xiyan Li
EPI550823	HA	China	2014-Apr-17	B/Shanghai-Chongming/1364/2014	WHO Chinese National Influenza Center	Centers for Disease Control and Prevention
EPI548574	HA	Lao, People's Democratic Republic	2014-May-09	B/Laos/SA274/2014	Ministry of Health Laos	National Institute of Infectious Diseases (NIID)	Takashita,Emi; Fujisaki,Seiichiro; Shirakura,Masayuki; Watanabe,Shinji; Odagiri,Takato
EPI548564	HA	Lao, People's Democratic Republic	2014-Mar-24	B/Laos/I321/2014	Ministry of Health Laos	National Institute of Infectious Diseases (NIID)	Takashita,Emi; Fujisaki,Seiichiro; Shirakura,Masayuki; Watanabe,Shinji; Odagiri,Takato
EPI548562	HA	Lao, People's Democratic Republic	2014-Mar-17	B/Laos/I306/2014	Ministry of Health Laos	National Institute of Infectious Diseases (NIID)	Takashita,Emi; Fujisaki,Seiichiro; Shirakura,Masayuki; Watanabe,Shinji; Odagiri,Takato
EPI548552	HA	Lao, People's Democratic Republic	2014-Feb-17	B/Laos/I164/2014	Ministry of Health Laos	National Institute of Infectious Diseases (NIID)	Takashita,Emi; Fujisaki,Seiichiro; Shirakura,Masayuki; Watanabe,Shinji; Odagiri,Takato
EPI544240	HA	Indonesia	2014-Mar-19	B/Indonesia/Nihrd-Buas 882/2014	Ministry of Health, NIHRD	Centers for Disease Control and Prevention
EPI544166	HA	Japan	2014-Jun-10	B/MIYAZAKI/59/2014	Miyazaki Prefectural Institute for Public Health and Environment	National Institute of Infectious Diseases (NIID)	Takashita,Emi; Fujisaki,Seiichiro; Shirakura,Masayuki; Odagiri,Takato
EPI544154	HA	Japan	2014-Mar-11	B/KYOTO-C/12/2014	Kyoto City Institute of Health and Environmental Sciences	National Institute of Infectious Diseases (NIID)	Takashita,Emi; Fujisaki,Seiichiro; Shirakura,Masayuki; Odagiri,Takato
EPI543639	HA	United States	2014-Jul-31	B/Hawaii/22/2014	State of Hawaii Department of Health	Centers for Disease Control and Prevention
EPI543202	HA	Israel	2014-Mar-01	B/Israel/Z-1461/2014	Central Virology Laboratory Israel (NIC)	National Institute for Medical Research
EPI543199	HA	Israel	2014-Feb-18	B/Israel/Z-1323/2014	Central Virology Laboratory Israel (NIC)	National Institute for Medical Research
EPI543191	HA	Hong Kong (SAR)	2013-Dec-11	B/Hong Kong/432/2013	Government Virus Unit	National Institute for Medical Research
EPI541783	HA	Netherlands	2014-Apr-09	B/Netherlands/257/14	Erasmus Medical Center	Erasmus Medical Center
EPI541781	HA	Netherlands	2014-Feb-09	B/Netherlands/076/14	Erasmus Medical Center	Erasmus Medical Center
EPI541768	HA	Guatemala	2014-Jul-16	B/Guatemala/9720/2014	Laboratorio Nacional De Salud Guatemala	Centers for Disease Control and Prevention
EPI541560	HA	Ukraine	2014-Apr-01	B/Dnipro/318/2014	Institute of Epidemiology and Infectious Diseases AMS of Ukraine	Centers for Disease Control and Prevention
EPI541477	HA	Japan	2014-Apr-14	B/SENDAI/55/2014	Sendai City Institute of Public Health	National Institute of Infectious Diseases (NIID)	Takashita,Emi; Fujisaki,Seiichiro; Shirakura,Masayuki; Odagiri,Takato
EPI541288	HA	Australia	2014-May-27	B/SOUTH AUSTRALIA/1000/2014	Institute of Medical and Veterinary Science (IMVS)	WHO Collaborating Centre for Reference and Research on Influenza	Deng,Y-M.; Iannello,P.; Spirason,N.; Jelley,L.; Lau,H.; Komadina,N.
EPI541112	HA	Norway	2014-May-30	B/Norway/1927/2014	Mikrobiologisk laboratorium, Sykehuset i Vestfold	Norwegian Institute of Public Health	Bragstad K, Dudman SG, Waalen K, Hungnes O
EPI541107	HA	Norway	2014-Feb-07	B/Norway/525/2014	Oslo University Hospital, Ulleval Hospital, Dept. of Microbiology	Norwegian Institute of Public Health	Bragstad K, Dudman SG, Waalen K, Hungnes O
EPI540906	HA	Australia	2014-May-05	B/SYDNEY/13/2014	Westmead Hospital	WHO Collaborating Centre for Reference and Research on Influenza	Deng,Y-M.; Iannello,P.; Spirason,N.; Jelley,L.; Lau,H.; Komadina,N.
EPI540683	HA	Australia	2013-Nov-21	B/Phuket/3073/2013	WHO Collaborating Centre for Reference and Research on Influenza	National Institute for Medical Research
EPI540651	HA	Hungary	2014-Jan-20	B/Hungary/378/2014	Central Veterinary Institute Budapest	National Institute for Medical Research
EPI540641	HA	Ghana	2014-Apr-28	B/Ghana/DILI-0434/2014	University of Ghana	National Institute for Medical Research
EPI541735	HA	Chile	2014-Jul-29	B/Rancagua/48219/2014	Instituto de Salud Publica de Chile	Centers for Disease Control and Prevention
EPI540567	HA	Puerto Rico	2014-Jun-09	B/Puerto Rico/07/2014	Puerto Rico Department of Health	Centers for Disease Control and Prevention
EPI540121	HA	Japan	2014-Apr-14	B/SENDAI/55/2014	Sendai City Institute of Public Health	National Institute of Infectious Diseases (NIID)	Takashita,Emi; Fujisaki,Seiichiro; Shirakura,Masayuki; Ejima,Miho; Tashiro,Masato; Odagiri,Takato
EPI539448	HA	Russian Federation	2014-Apr-16	B/Moscow/23/2014	Ivanovsky Research Institute of Virology RAMS	National Institute for Medical Research
EPI539420	HA	Belarus	2014-May-09	B/Gomel/1634/2014	Laboratory of Influenza and ILI	National Institute for Medical Research
EPI539414	HA	Spain	2014-Mar-17	B/Extremadura/1755/2014	Instituto de Salud Carlos III	National Institute for Medical Research
EPI538175	HA	Burkina Faso	2014-Mar-06	B/Burkina Faso/285/2014	IRSS	Centers for Disease Control and Prevention
EPI538167	HA	Bangladesh	2014-Jun-03	B/Bangladesh/2004/2014	Institute of Epidemiology Disease Control and Research (IEDCR) & Bangladesh National Influenza Centre (NIC)	Centers for Disease Control and Prevention
EPI538003	HA	Brazil	2014-May-06	B/Sao Paulo/9-4966/2014	Instituto Adolfo Lutz	Instituto Adolfo Lutz	Santos,Katia;Silva,Daniela;Benega,Margarete;Paulino,Renato;Santos,Cecilia;Paiva,Terezinha
EPI537820	HA	Brazil	2014-Jul-08	B/Sao Paulo/60361/2014	Instituto Adolfo Lutz	Instituto Adolfo Lutz	Santos,Katia;Silva,Daniela;Benega,Margarete;Paulino,Renato;Santos,Cecilia;Paiva,Terezinha
EPI537815	HA	Brazil	2014-Jul-11	B/Sao Paulo/61679/2014	Instituto Adolfo Lutz	Instituto Adolfo Lutz	Santos,Katia;Silva,Daniela;Benega,Margarete;Paulino,Renato;Santos,Cecilia;Paiva,Terezinha
EPI537688	HA	France	2014-May-12	B/Centre/1663/2014	Institut Pasteur	Institut Pasteur	V,ENOUF
EPI536584	HA	Brazil	2014-Mar-25	B/Brazil/5137/2014	Instituto Adolfo Lutz	Centers for Disease Control and Prevention
EPI536431	HA	Romania	2014-Mar-20	B/Bucuresti/1772-1324/2014	Cantacuzino Institute	National Institute for Medical Research
EPI534717	HA	Japan	2014-Jan-21	B/YOKOHAMA/27/2014	Yokohama City Institute of Health	National Institute of Infectious Diseases (NIID)	Takashita,Emi; Fujisaki,Seiichiro; Shirakura,Masayuki; Ejima,Miho; Tashiro,Masato; Odagiri,Takato
EPI534644	HA	Japan	2014-Jan-11	B/FUKUI/3/2014	Fukui Prefectural Institute of Public Health	National Institute of Infectious Diseases (NIID)	Takashita,Emi; Fujisaki,Seiichiro; Shirakura,Masayuki; Ejima,Miho; Tashiro,Masato; Odagiri,Takato
EPI533643	HA	United States	2014-May-22	B/Nevada/11/2014	Southern Nevada Public Health Lab	Centers for Disease Control and Prevention
EPI533287	HA	Netherlands	2013-Mar-22	B/Bilthoven/4311300634/2013	National Institute for Public Health and the Environment (RIVM)	National Institute for Public Health and the Environment (RIVM)	Meijer, A.;Overduin, P.
EPI533281	HA	Netherlands	2013-Mar-01	B/Bilthoven/4311300491/2013	National Institute for Public Health and the Environment (RIVM)	National Institute for Public Health and the Environment (RIVM)	Meijer, A.;Overduin, P.
EPI533082	HA	Ukraine	2014-Feb-26	B/Ukraine/6068/2014	Ministry of Health of Ukraine	National Institute for Medical Research
EPI532492	HA	United States	2014-Feb-03	B/California/NHRC423871/2014		Other Database Import	Thammavong,H.; Balansay-Ames,M.; Hawksworth,A.; Myers,C.A.; Connors,B.; de Mattos,C.; Brice,G.
EPI532478	HA	United States	2014-Jan-23	B/California/NHRC421943/2014		Other Database Import	Thammavong,H.; Balansay-Ames,M.; Hawksworth,A.; Myers,C.A.; Connors,B.; de Mattos,C.; Brice,G.
EPI532476	HA	United States	2014-Jan-11	B/California/NHRC419618/2014		Other Database Import	Thammavong,H.; Balansay-Ames,M.; Hawksworth,A.; Myers,C.A.; Connors,B.; de Mattos,C.; Brice,G.
EPI532474	HA	United States	2014-Jan-21	B/California/NHRC420978/2014		Other Database Import	Thammavong,H.; Balansay-Ames,M.; Hawksworth,A.; Myers,C.A.; Connors,B.; de Mattos,C.; Brice,G.
EPI532236	HA	United States	2014-Mar-18	B/New York/3865/2014		Other Database Import	Connors,B.C.; Jones,S.L.; Bisaha,S.A.; Canas,L.C.; Baker,J.A.; Couch,M.R.; Garrett,C.M.; Powell,M.L.; Hanson,J.F.; Yohannes,R.A.; DeMarcus,L.S.; Smith,J.P.; Fumia,K.F.; Zorich,S.C.; Macias,E.A.; Olsen,E.T.; Sjoberg,P.A.
EPI532235	HA	United States	2014-Apr-03	B/New Jersey/3864/2014		Other Database Import	Connors,B.C.; Jones,S.L.; Bisaha,S.A.; Canas,L.C.; Baker,J.A.; Couch,M.R.; Garrett,C.M.; Powell,M.L.; Hanson,J.F.; Yohannes,R.A.; DeMarcus,L.S.; Smith,J.P.; Fumia,K.F.; Zorich,S.C.; Macias,E.A.; Olsen,E.T.; Sjoberg,P.A.
EPI532227	HA	United States	2014-Feb-04	B/Louisiana/3856/2014		Other Database Import	Connors,B.C.; Jones,S.L.; Bisaha,S.A.; Canas,L.C.; Baker,J.A.; Couch,M.R.; Garrett,C.M.; Powell,M.L.; Hanson,J.F.; Yohannes,R.A.; DeMarcus,L.S.; Smith,J.P.; Fumia,K.F.; Zorich,S.C.; Macias,E.A.; Olsen,E.T.; Sjoberg,P.A.
EPI532220	HA	Japan	2014-Mar-19	B/Japan/3849/2014		Other Database Import	Connors,B.C.; Jones,S.L.; Bisaha,S.A.; Canas,L.C.; Baker,J.A.; Couch,M.R.; Garrett,C.M.; Powell,M.L.; Hanson,J.F.; Yohannes,R.A.; DeMarcus,L.S.; Smith,J.P.; Fumia,K.F.; Zorich,S.C.; Macias,E.A.; Olsen,E.T.; Sjoberg,P.A.
EPI532216	HA	Japan	2014-Mar-12	B/Japan/3845/2014		Other Database Import	Connors,B.C.; Jones,S.L.; Bisaha,S.A.; Canas,L.C.; Baker,J.A.; Couch,M.R.; Garrett,C.M.; Powell,M.L.; Hanson,J.F.; Yohannes,R.A.; DeMarcus,L.S.; Smith,J.P.; Fumia,K.F.; Zorich,S.C.; Macias,E.A.; Olsen,E.T.; Sjoberg,P.A.
EPI532211	HA	Japan	2014-Mar-01	B/Japan/3840/2014		Other Database Import	Connors,B.C.; Jones,S.L.; Bisaha,S.A.; Canas,L.C.; Baker,J.A.; Couch,M.R.; Garrett,C.M.; Powell,M.L.; Hanson,J.F.; Yohannes,R.A.; DeMarcus,L.S.; Smith,J.P.; Fumia,K.F.; Zorich,S.C.; Macias,E.A.; Olsen,E.T.; Sjoberg,P.A.
EPI532205	HA	Korea, Republic of	2014-Jan-29	B/Korea/3834/2014		Other Database Import	Connors,B.C.; Jones,S.L.; Bisaha,S.A.; Canas,L.C.; Baker,J.A.; Couch,M.R.; Garrett,C.M.; Powell,M.L.; Hanson,J.F.; Yohannes,R.A.; DeMarcus,L.S.; Smith,J.P.; Fumia,K.F.; Zorich,S.C.; Macias,E.A.; Olsen,E.T.; Sjoberg,P.A.
EPI532190	HA	United States	2014-Mar-31	B/Colorado/3819/2014		Other Database Import	Connors,B.C.; Jones,S.L.; Bisaha,S.A.; Canas,L.C.; Baker,J.A.; Couch,M.R.; Garrett,C.M.; Powell,M.L.; Hanson,J.F.; Yohannes,R.A.; DeMarcus,L.S.; Smith,J.P.; Fumia,K.F.; Zorich,S.C.; Macias,E.A.; Olsen,E.T.; Sjoberg,P.A.
EPI532187	HA	United States	2014-Feb-09	B/California/3816/2014		Other Database Import	Connors,B.C.; Jones,S.L.; Bisaha,S.A.; Canas,L.C.; Baker,J.A.; Couch,M.R.; Garrett,C.M.; Powell,M.L.; Hanson,J.F.; Yohannes,R.A.; DeMarcus,L.S.; Smith,J.P.; Fumia,K.F.; Zorich,S.C.; Macias,E.A.; Olsen,E.T.; Sjoberg,P.A.
EPI532184	HA	United States	2014-Jan-23	B/California/3813/2014		Other Database Import	Connors,B.C.; Jones,S.L.; Bisaha,S.A.; Canas,L.C.; Baker,J.A.; Couch,M.R.; Garrett,C.M.; Powell,M.L.; Hanson,J.F.; Yohannes,R.A.; DeMarcus,L.S.; Smith,J.P.; Fumia,K.F.; Zorich,S.C.; Macias,E.A.; Olsen,E.T.; Sjoberg,P.A.
EPI531409	HA	Japan	2013-Dec-21	B/YOKOSUKA/8/2013	Yokosuka Institute of Public Health	National Institute of Infectious Diseases (NIID)	Takashita,Emi; Fujisaki,Seiichiro; Shirakura,Masayuki; Ejima,Miho; Tashiro,Masato; Odagiri,Takato
EPI531407	HA	Japan	2014-Jan-15	B/EHIME/2/2014	Ehime Prefecture Institute of Public Health and Environmental Science	National Institute of Infectious Diseases (NIID)	Takashita,Emi; Fujisaki,Seiichiro; Shirakura,Masayuki; Ejima,Miho; Tashiro,Masato; Odagiri,Takato
EPI530721	HA	Cameroon	2011-Aug-04	B/Hevecam/2011V-17457 GVFI/2011	Centre Pasteur du Cameroun	National Institute for Medical Research
EPI529613	HA	New Zealand	2014-Jan-14	B/SOUTH AUCKLAND/001/2014	Institute of Environmental Science and Research	WHO Collaborating Centre for Reference and Research on Influenza	Deng,Y-M.; Iannello,P.; Spirason,N.; Jelley,L.; Lau,H.; Komadina,N.
EPI529129	HA	Nicaragua	2012-Oct-04	B/Nicaragua/AGB2-13/2012		Other Database Import	Wentworth,D.E.; Halpin,R.A.; Lin,X.; Bera,J.; Akopov,A.; Ransier,A.; Mohan,M.; Fedorova,N.; Tsitrin,T.; Puri,V.; Stockwell,T.; Amedeo,P.; Appalla,L.; Bishop,B.; Edworthy,P.; Gupta,N.; Hoover,J.; Katzel,D.; Li,K.; Schobel,S.; Shrivastava,S.; Thovarai,V.; Wang,S.; Bao,Y.; Sanders,R.; Zhdanov,S.; Kiryutin,B.; Lipman,D.J.; Tatusova,T.; Gordon,A.
EPI529020	HA	Nicaragua	2012-Aug-02	B/Nicaragua/AGB2-24/2012		Other Database Import	Wentworth,D.E.; Halpin,R.A.; Lin,X.; Bera,J.; Akopov,A.; Ransier,A.; Mohan,M.; Fedorova,N.; Tsitrin,T.; Puri,V.; Stockwell,T.; Amedeo,P.; Appalla,L.; Bishop,B.; Edworthy,P.; Gupta,N.; Hoover,J.; Katzel,D.; Li,K.; Schobel,S.; Shrivastava,S.; Thovarai,V.; Wang,S.; Bao,Y.; Sanders,R.; Zhdanov,S.; Kiryutin,B.; Lipman,D.J.; Tatusova,T.; Gordon,A.
EPI528976	HA	Nicaragua	2012-Oct-08	B/Nicaragua/AGB2-29/2012		Other Database Import	Wentworth,D.E.; Halpin,R.A.; Lin,X.; Bera,J.; Akopov,A.; Ransier,A.; Mohan,M.; Fedorova,N.; Tsitrin,T.; Puri,V.; Stockwell,T.; Amedeo,P.; Appalla,L.; Bishop,B.; Edworthy,P.; Gupta,N.; Hoover,J.; Katzel,D.; Li,K.; Schobel,S.; Shrivastava,S.; Thovarai,V.; Wang,S.; Bao,Y.; Sanders,R.; Zhdanov,S.; Kiryutin,B.; Lipman,D.J.; Tatusova,T.; Gordon,A.
EPI528892	HA	Nicaragua	2012-Oct-23	B/Nicaragua/AGB2-42/2012		Other Database Import	Wentworth,D.E.; Halpin,R.A.; Lin,X.; Bera,J.; Akopov,A.; Ransier,A.; Mohan,M.; Fedorova,N.; Tsitrin,T.; Puri,V.; Stockwell,T.; Amedeo,P.; Appalla,L.; Bishop,B.; Edworthy,P.; Gupta,N.; Hoover,J.; Katzel,D.; Li,K.; Schobel,S.; Shrivastava,S.; Thovarai,V.; Wang,S.; Bao,Y.; Sanders,R.; Zhdanov,S.; Kiryutin,B.; Lipman,D.J.; Tatusova,T.; Gordon,A.
EPI528785	HA	United States	2014-Jan-15	B/California/NHRC418030/2014		Other Database Import	Thammavong,H.; Balansay-Ames,M.; Hawksworth,A.; Myers,C.A.; Connors,B.; de Mattos,C.; Brice,G.
EPI526722	HA	Australia	2013-Oct-26	B/SYDNEY/1015/2013	Institute of Medical and Veterinary Science (IMVS)	WHO Collaborating Centre for Reference and Research on Influenza	Deng,Y-D.; Iannello,P.; Spirason,N.; Jelley,L.; Lau,H.; Komadina,N.
EPI526095	HA	Canada	2014-Mar-06	B/New Brunswick/RV1555/2014	National Microbiology Laboratory, Health Canada	Centers for Disease Control and Prevention
EPI524277	HA	United States	2014-Mar-13	B/Mississippi/02/2014	Mississippi Public Health Laboratory	Centers for Disease Control and Prevention
EPI520259	HA	United States	2009-Mar-24	B/New York/1231/2009		Other Database Import	Wentworth,D.E.; Halpin,R.A.; Lin,X.; Bera,J.; Akopov,A.; Ransier,A.; Mohan,M.; Fedorova,N.; Tsitrin,T.; Stockwell,T.; Amedeo,P.; Appalla,L.; Bishop,B.; Edworthy,P.; Gupta,N.; Hoover,J.; Katzel,D.; Li,K.; Schobel,S.; Shrivastava,S.; Thovarai,V.; Wang,S.; Griesemer,S.B.; Bao,Y.; Sanders,R.; Zhdanov,S.; Kiryutin,B.; Lipman,D.J.; Tatusova,T.; St. George,K.
EPI520243	HA	United States	2009-Feb-01	B/New York/1228/2009		Other Database Import	Wentworth,D.E.; Halpin,R.A.; Lin,X.; Bera,J.; Akopov,A.; Ransier,A.; Mohan,M.; Fedorova,N.; Tsitrin,T.; Stockwell,T.; Amedeo,P.; Appalla,L.; Bishop,B.; Edworthy,P.; Gupta,N.; Hoover,J.; Katzel,D.; Li,K.; Schobel,S.; Shrivastava,S.; Thovarai,V.; Wang,S.; Griesemer,S.B.; Bao,Y.; Sanders,R.; Zhdanov,S.; Kiryutin,B.; Lipman,D.J.; Tatusova,T.; St. George,K.
EPI520195	HA	United States	2012-May-07	B/New York/1372/2012		Other Database Import	Wentworth,D.E.; Halpin,R.A.; Lin,X.; Bera,J.; Akopov,A.; Ransier,A.; Mohan,M.; Fedorova,N.; Tsitrin,T.; Stockwell,T.; Amedeo,P.; Appalla,L.; Bishop,B.; Edworthy,P.; Gupta,N.; Hoover,J.; Katzel,D.; Li,K.; Schobel,S.; Shrivastava,S.; Thovarai,V.; Wang,S.; Griesemer,S.B.; Bao,Y.; Sanders,R.; Zhdanov,S.; Kiryutin,B.; Lipman,D.J.; Tatusova,T.; St. George,K.
EPI520147	HA	United States	2012-May-03	B/New York/1365/2012		Other Database Import	Wentworth,D.E.; Halpin,R.A.; Lin,X.; Bera,J.; Akopov,A.; Ransier,A.; Mohan,M.; Fedorova,N.; Tsitrin,T.; Stockwell,T.; Amedeo,P.; Appalla,L.; Bishop,B.; Edworthy,P.; Gupta,N.; Hoover,J.; Katzel,D.; Li,K.; Schobel,S.; Shrivastava,S.; Thovarai,V.; Wang,S.; Griesemer,S.B.; Bao,Y.; Sanders,R.; Zhdanov,S.; Kiryutin,B.; Lipman,D.J.; Tatusova,T.; St. George,K.
EPI520139	HA	United States	2012-Apr-24	B/New York/1363/2012		Other Database Import	Wentworth,D.E.; Halpin,R.A.; Lin,X.; Bera,J.; Akopov,A.; Ransier,A.; Mohan,M.; Fedorova,N.; Tsitrin,T.; Stockwell,T.; Amedeo,P.; Appalla,L.; Bishop,B.; Edworthy,P.; Gupta,N.; Hoover,J.; Katzel,D.; Li,K.; Schobel,S.; Shrivastava,S.; Thovarai,V.; Wang,S.; Griesemer,S.B.; Bao,Y.; Sanders,R.; Zhdanov,S.; Kiryutin,B.; Lipman,D.J.; Tatusova,T.; St. George,K.
EPI520091	HA	United States	2012-Apr-14	B/New York/1355/2012		Other Database Import	Wentworth,D.E.; Halpin,R.A.; Lin,X.; Bera,J.; Akopov,A.; Ransier,A.; Mohan,M.; Fedorova,N.; Tsitrin,T.; Stockwell,T.; Amedeo,P.; Appalla,L.; Bishop,B.; Edworthy,P.; Gupta,N.; Hoover,J.; Katzel,D.; Li,K.; Schobel,S.; Shrivastava,S.; Thovarai,V.; Wang,S.; Griesemer,S.B.; Bao,Y.; Sanders,R.; Zhdanov,S.; Kiryutin,B.; Lipman,D.J.; Tatusova,T.; St. George,K.
EPI520019	HA	United States	2012-Mar-30	B/New York/1346/2012		Other Database Import	Wentworth,D.E.; Halpin,R.A.; Lin,X.; Bera,J.; Akopov,A.; Ransier,A.; Mohan,M.; Fedorova,N.; Tsitrin,T.; Stockwell,T.; Amedeo,P.; Appalla,L.; Bishop,B.; Edworthy,P.; Gupta,N.; Hoover,J.; Katzel,D.; Li,K.; Schobel,S.; Shrivastava,S.; Thovarai,V.; Wang,S.; Griesemer,S.B.; Bao,Y.; Sanders,R.; Zhdanov,S.; Kiryutin,B.; Lipman,D.J.; Tatusova,T.; St. George,K.
EPI519971	HA	United States	2012-Mar-17	B/New York/1340/2012		Other Database Import	Wentworth,D.E.; Halpin,R.A.; Lin,X.; Bera,J.; Akopov,A.; Ransier,A.; Mohan,M.; Fedorova,N.; Tsitrin,T.; Stockwell,T.; Amedeo,P.; Appalla,L.; Bishop,B.; Edworthy,P.; Gupta,N.; Hoover,J.; Katzel,D.; Li,K.; Schobel,S.; Shrivastava,S.; Thovarai,V.; Wang,S.; Griesemer,S.B.; Bao,Y.; Sanders,R.; Zhdanov,S.; Kiryutin,B.; Lipman,D.J.; Tatusova,T.; St. George,K.
EPI519907	HA	United States	2012-Mar-01	B/New York/1332/2012		Other Database Import	Wentworth,D.E.; Halpin,R.A.; Lin,X.; Bera,J.; Akopov,A.; Ransier,A.; Mohan,M.; Fedorova,N.; Tsitrin,T.; Stockwell,T.; Amedeo,P.; Appalla,L.; Bishop,B.; Edworthy,P.; Gupta,N.; Hoover,J.; Katzel,D.; Li,K.; Schobel,S.; Shrivastava,S.; Thovarai,V.; Wang,S.; Griesemer,S.B.; Bao,Y.; Sanders,R.; Zhdanov,S.; Kiryutin,B.; Lipman,D.J.; Tatusova,T.; St. George,K.
EPI519851	HA	United States	2011-Apr-05	B/New York/1301/2011		Other Database Import	Wentworth,D.E.; Halpin,R.A.; Lin,X.; Bera,J.; Akopov,A.; Ransier,A.; Mohan,M.; Fedorova,N.; Tsitrin,T.; Stockwell,T.; Amedeo,P.; Appalla,L.; Bishop,B.; Edworthy,P.; Gupta,N.; Hoover,J.; Katzel,D.; Li,K.; Schobel,S.; Shrivastava,S.; Thovarai,V.; Wang,S.; Griesemer,S.B.; Bao,Y.; Sanders,R.; Zhdanov,S.; Kiryutin,B.; Lipman,D.J.; Tatusova,T.; St. George,K.
EPI519803	HA	United States	2011-Mar-14	B/New York/1293/2011		Other Database Import	Wentworth,D.E.; Halpin,R.A.; Lin,X.; Bera,J.; Akopov,A.; Ransier,A.; Mohan,M.; Fedorova,N.; Tsitrin,T.; Stockwell,T.; Amedeo,P.; Appalla,L.; Bishop,B.; Edworthy,P.; Gupta,N.; Hoover,J.; Katzel,D.; Li,K.; Schobel,S.; Shrivastava,S.; Thovarai,V.; Wang,S.; Griesemer,S.B.; Bao,Y.; Sanders,R.; Zhdanov,S.; Kiryutin,B.; Lipman,D.J.; Tatusova,T.; St. George,K.
EPI519739	HA	United States	2011-Feb-18	B/New York/1284/2011		Other Database Import	Wentworth,D.E.; Halpin,R.A.; Lin,X.; Bera,J.; Akopov,A.; Ransier,A.; Mohan,M.; Fedorova,N.; Tsitrin,T.; Stockwell,T.; Amedeo,P.; Appalla,L.; Bishop,B.; Edworthy,P.; Gupta,N.; Hoover,J.; Katzel,D.; Li,K.; Schobel,S.; Shrivastava,S.; Thovarai,V.; Wang,S.; Griesemer,S.B.; Bao,Y.; Sanders,R.; Zhdanov,S.; Kiryutin,B.; Lipman,D.J.; Tatusova,T.; St. George,K.
EPI519635	HA	United States	2011-Feb-08	B/New York/1270/2011		Other Database Import	Wentworth,D.E.; Halpin,R.A.; Lin,X.; Bera,J.; Akopov,A.; Ransier,A.; Mohan,M.; Fedorova,N.; Tsitrin,T.; Stockwell,T.; Amedeo,P.; Appalla,L.; Bishop,B.; Edworthy,P.; Gupta,N.; Hoover,J.; Katzel,D.; Li,K.; Schobel,S.; Shrivastava,S.; Thovarai,V.; Wang,S.; Griesemer,S.B.; Bao,Y.; Sanders,R.; Zhdanov,S.; Kiryutin,B.; Lipman,D.J.; Tatusova,T.; St. George,K.
EPI519571	HA	United States	2011-Feb-02	B/New York/1262/2011		Other Database Import	Wentworth,D.E.; Halpin,R.A.; Lin,X.; Bera,J.; Akopov,A.; Ransier,A.; Mohan,M.; Fedorova,N.; Tsitrin,T.; Stockwell,T.; Amedeo,P.; Appalla,L.; Bishop,B.; Edworthy,P.; Gupta,N.; Hoover,J.; Katzel,D.; Li,K.; Schobel,S.; Shrivastava,S.; Thovarai,V.; Wang,S.; Griesemer,S.B.; Bao,Y.; Sanders,R.; Zhdanov,S.; Kiryutin,B.; Lipman,D.J.; Tatusova,T.; St. George,K.
EPI519563	HA	United States	2011-Feb-03	B/New York/1261/2011		Other Database Import	Wentworth,D.E.; Halpin,R.A.; Lin,X.; Bera,J.; Akopov,A.; Ransier,A.; Mohan,M.; Fedorova,N.; Tsitrin,T.; Stockwell,T.; Amedeo,P.; Appalla,L.; Bishop,B.; Edworthy,P.; Gupta,N.; Hoover,J.; Katzel,D.; Li,K.; Schobel,S.; Shrivastava,S.; Thovarai,V.; Wang,S.; Griesemer,S.B.; Bao,Y.; Sanders,R.; Zhdanov,S.; Kiryutin,B.; Lipman,D.J.; Tatusova,T.; St. George,K.
EPI519515	HA	United States	2011-Jan-31	B/New York/1253/2011		Other Database Import	Wentworth,D.E.; Halpin,R.A.; Lin,X.; Bera,J.; Akopov,A.; Ransier,A.; Mohan,M.; Fedorova,N.; Tsitrin,T.; Stockwell,T.; Amedeo,P.; Appalla,L.; Bishop,B.; Edworthy,P.; Gupta,N.; Hoover,J.; Katzel,D.; Li,K.; Schobel,S.; Shrivastava,S.; Thovarai,V.; Wang,S.; Griesemer,S.B.; Bao,Y.; Sanders,R.; Zhdanov,S.; Kiryutin,B.; Lipman,D.J.; Tatusova,T.; St. George,K.
EPI519499	HA	United States	2011-Jan-26	B/New York/1251/2011		Other Database Import	Wentworth,D.E.; Halpin,R.A.; Lin,X.; Bera,J.; Akopov,A.; Ransier,A.; Mohan,M.; Fedorova,N.; Tsitrin,T.; Stockwell,T.; Amedeo,P.; Appalla,L.; Bishop,B.; Edworthy,P.; Gupta,N.; Hoover,J.; Katzel,D.; Li,K.; Schobel,S.; Shrivastava,S.; Thovarai,V.; Wang,S.; Griesemer,S.B.; Bao,Y.; Sanders,R.; Zhdanov,S.; Kiryutin,B.; Lipman,D.J.; Tatusova,T.; St. George,K.
EPI519459	HA	United States	2011-Jan-19	B/New York/1246/2011		Other Database Import	Wentworth,D.E.; Halpin,R.A.; Lin,X.; Bera,J.; Akopov,A.; Ransier,A.; Mohan,M.; Fedorova,N.; Tsitrin,T.; Stockwell,T.; Amedeo,P.; Appalla,L.; Bishop,B.; Edworthy,P.; Gupta,N.; Hoover,J.; Katzel,D.; Li,K.; Schobel,S.; Shrivastava,S.; Thovarai,V.; Wang,S.; Griesemer,S.B.; Bao,Y.; Sanders,R.; Zhdanov,S.; Kiryutin,B.; Lipman,D.J.; Tatusova,T.; St. George,K.
EPI519043	HA	United States	2006-Apr-10	B/New York/1095/2006		Other Database Import	Wentworth,D.E.; Halpin,R.A.; Lin,X.; Bera,J.; Akopov,A.; Ransier,A.; Mohan,M.; Fedorova,N.; Tsitrin,T.; Stockwell,T.; Amedeo,P.; Appalla,L.; Bishop,B.; Edworthy,P.; Gupta,N.; Hoover,J.; Katzel,D.; Li,K.; Schobel,S.; Shrivastava,S.; Thovarai,V.; Wang,S.; Griesemer,S.B.; Bao,Y.; Sanders,R.; Zhdanov,S.; Kiryutin,B.; Lipman,D.J.; Tatusova,T.; St. George,K.
EPI519035	HA	United States	2005-Apr-04	B/New York/1085/2005		Other Database Import	Wentworth,D.E.; Halpin,R.A.; Lin,X.; Bera,J.; Akopov,A.; Ransier,A.; Mohan,M.; Fedorova,N.; Tsitrin,T.; Stockwell,T.; Amedeo,P.; Appalla,L.; Bishop,B.; Edworthy,P.; Gupta,N.; Hoover,J.; Katzel,D.; Li,K.; Schobel,S.; Shrivastava,S.; Thovarai,V.; Wang,S.; Griesemer,S.B.; Bao,Y.; Sanders,R.; Zhdanov,S.; Kiryutin,B.; Lipman,D.J.; Tatusova,T.; St. George,K.
EPI518963	HA	United States	2008-Mar-04	B/New York/1175/2008		Other Database Import	Wentworth,D.E.; Halpin,R.A.; Lin,X.; Bera,J.; Akopov,A.; Ransier,A.; Mohan,M.; Fedorova,N.; Tsitrin,T.; Stockwell,T.; Amedeo,P.; Appalla,L.; Bishop,B.; Edworthy,P.; Gupta,N.; Hoover,J.; Katzel,D.; Li,K.; Schobel,S.; Shrivastava,S.; Thovarai,V.; Wang,S.; Griesemer,S.B.; Bao,Y.; Sanders,R.; Zhdanov,S.; Kiryutin,B.; Lipman,D.J.; Tatusova,T.; St. George,K.
EPI518739	HA	United States	2008-Jan-22	B/New York/1146/2008		Other Database Import	Wentworth,D.E.; Halpin,R.A.; Lin,X.; Bera,J.; Akopov,A.; Ransier,A.; Mohan,M.; Fedorova,N.; Tsitrin,T.; Stockwell,T.; Amedeo,P.; Appalla,L.; Bishop,B.; Edworthy,P.; Gupta,N.; Hoover,J.; Katzel,D.; Li,K.; Schobel,S.; Shrivastava,S.; Thovarai,V.; Wang,S.; Griesemer,S.B.; Bao,Y.; Sanders,R.; Zhdanov,S.; Kiryutin,B.; Lipman,D.J.; Tatusova,T.; St. George,K.
EPI518723	HA	United States	2008-Jan-22	B/New York/1144/2008		Other Database Import	Wentworth,D.E.; Halpin,R.A.; Lin,X.; Bera,J.; Akopov,A.; Ransier,A.; Mohan,M.; Fedorova,N.; Tsitrin,T.; Stockwell,T.; Amedeo,P.; Appalla,L.; Bishop,B.; Edworthy,P.; Gupta,N.; Hoover,J.; Katzel,D.; Li,K.; Schobel,S.; Shrivastava,S.; Thovarai,V.; Wang,S.; Griesemer,S.B.; Bao,Y.; Sanders,R.; Zhdanov,S.; Kiryutin,B.; Lipman,D.J.; Tatusova,T.; St. George,K.
EPI518579	HA	United States	2007-Mar-30	B/New York/1120/2007		Other Database Import	Wentworth,D.E.; Halpin,R.A.; Lin,X.; Bera,J.; Akopov,A.; Ransier,A.; Mohan,M.; Fedorova,N.; Tsitrin,T.; Stockwell,T.; Amedeo,P.; Appalla,L.; Bishop,B.; Edworthy,P.; Gupta,N.; Hoover,J.; Katzel,D.; Li,K.; Schobel,S.; Shrivastava,S.; Thovarai,V.; Wang,S.; Griesemer,S.B.; Bao,Y.; Sanders,R.; Zhdanov,S.; Kiryutin,B.; Lipman,D.J.; Tatusova,T.; St. George,K.
EPI518458	HA	United States	2007-Feb-06	B/New York/1104/2007		Other Database Import	Wentworth,D.E.; Halpin,R.A.; Lin,X.; Bera,J.; Akopov,A.; Ransier,A.; Mohan,M.; Fedorova,N.; Tsitrin,T.; Stockwell,T.; Amedeo,P.; Appalla,L.; Bishop,B.; Edworthy,P.; Gupta,N.; Hoover,J.; Katzel,D.; Li,K.; Schobel,S.; Shrivastava,S.; Thovarai,V.; Wang,S.; Griesemer,S.B.; Bao,Y.; Sanders,R.; Zhdanov,S.; Kiryutin,B.; Lipman,D.J.; Tatusova,T.; St. George,K.
EPI518410	HA	United States	2006-May-15	B/New York/1091/2006		Other Database Import	Wentworth,D.E.; Halpin,R.A.; Lin,X.; Bera,J.; Akopov,A.; Ransier,A.; Mohan,M.; Fedorova,N.; Tsitrin,T.; Stockwell,T.; Amedeo,P.; Appalla,L.; Bishop,B.; Edworthy,P.; Gupta,N.; Hoover,J.; Katzel,D.; Li,K.; Schobel,S.; Shrivastava,S.; Thovarai,V.; Wang,S.; Griesemer,S.B.; Bao,Y.; Sanders,R.; Zhdanov,S.; Kiryutin,B.; Lipman,D.J.; Tatusova,T.; St. George,K.
EPI518378	HA	United States	2005-Apr-08	B/New York/1078/2005		Other Database Import	Wentworth,D.E.; Halpin,R.A.; Lin,X.; Bera,J.; Akopov,A.; Ransier,A.; Mohan,M.; Fedorova,N.; Tsitrin,T.; Stockwell,T.; Amedeo,P.; Appalla,L.; Bishop,B.; Edworthy,P.; Gupta,N.; Hoover,J.; Katzel,D.; Li,K.; Schobel,S.; Shrivastava,S.; Thovarai,V.; Wang,S.; Griesemer,S.B.; Bao,Y.; Sanders,R.; Zhdanov,S.; Kiryutin,B.; Lipman,D.J.; Tatusova,T.; St. George,K.
EPI518345	HA	United States	2005-Jan-29	B/New York/1070/2005		Other Database Import	Wentworth,D.E.; Halpin,R.A.; Lin,X.; Bera,J.; Akopov,A.; Ransier,A.; Mohan,M.; Fedorova,N.; Tsitrin,T.; Stockwell,T.; Amedeo,P.; Appalla,L.; Bishop,B.; Edworthy,P.; Gupta,N.; Hoover,J.; Katzel,D.; Li,K.; Schobel,S.; Shrivastava,S.; Thovarai,V.; Wang,S.; Griesemer,S.B.; Bao,Y.; Sanders,R.; Zhdanov,S.; Kiryutin,B.; Lipman,D.J.; Tatusova,T.; St. George,K.
EPI518266	HA	United States	2003-Dec-18	B/New York/1394/2003		Other Database Import	Wentworth,D.E.; Halpin,R.A.; Lin,X.; Bera,J.; Akopov,A.; Ransier,A.; Mohan,M.; Fedorova,N.; Tsitrin,T.; Stockwell,T.; Amedeo,P.; Appalla,L.; Bishop,B.; Edworthy,P.; Gupta,N.; Hoover,J.; Katzel,D.; Li,K.; Schobel,S.; Shrivastava,S.; Thovarai,V.; Wang,S.; Griesemer,S.B.; Bao,Y.; Sanders,R.; Zhdanov,S.; Kiryutin,B.; Lipman,D.J.; Tatusova,T.; St. George,K.
EPI518098	HA	United States	2001-Feb-07	B/New York/1037/2001		Other Database Import	Wentworth,D.E.; Halpin,R.A.; Lin,X.; Bera,J.; Akopov,A.; Ransier,A.; Mohan,M.; Fedorova,N.; Tsitrin,T.; Stockwell,T.; Amedeo,P.; Appalla,L.; Bishop,B.; Edworthy,P.; Gupta,N.; Hoover,J.; Katzel,D.; Li,K.; Schobel,S.; Shrivastava,S.; Thovarai,V.; Wang,S.; Griesemer,S.B.; Bao,Y.; Sanders,R.; Zhdanov,S.; Kiryutin,B.; Lipman,D.J.; Tatusova,T.; St. George,K.
EPI518010	HA	United States	2001-Jan-11	B/New York/1026/2001		Other Database Import	Wentworth,D.E.; Halpin,R.A.; Lin,X.; Bera,J.; Akopov,A.; Ransier,A.; Mohan,M.; Fedorova,N.; Tsitrin,T.; Stockwell,T.; Amedeo,P.; Appalla,L.; Bishop,B.; Edworthy,P.; Gupta,N.; Hoover,J.; Katzel,D.; Li,K.; Schobel,S.; Shrivastava,S.; Thovarai,V.; Wang,S.; Griesemer,S.B.; Bao,Y.; Sanders,R.; Zhdanov,S.; Kiryutin,B.; Lipman,D.J.; Tatusova,T.; St. George,K.
EPI518002	HA	United States	2001-Jan-04	B/New York/1025/2001		Other Database Import	Wentworth,D.E.; Halpin,R.A.; Lin,X.; Bera,J.; Akopov,A.; Ransier,A.; Mohan,M.; Fedorova,N.; Tsitrin,T.; Stockwell,T.; Amedeo,P.; Appalla,L.; Bishop,B.; Edworthy,P.; Gupta,N.; Hoover,J.; Katzel,D.; Li,K.; Schobel,S.; Shrivastava,S.; Thovarai,V.; Wang,S.; Griesemer,S.B.; Bao,Y.; Sanders,R.; Zhdanov,S.; Kiryutin,B.; Lipman,D.J.; Tatusova,T.; St. George,K.
EPI517946	HA	United States	1997-Feb-11	B/New York/1018/1997		Other Database Import	Wentworth,D.E.; Halpin,R.A.; Lin,X.; Bera,J.; Akopov,A.; Ransier,A.; Mohan,M.; Fedorova,N.; Tsitrin,T.; Stockwell,T.; Amedeo,P.; Appalla,L.; Bishop,B.; Edworthy,P.; Gupta,N.; Hoover,J.; Katzel,D.; Li,K.; Schobel,S.; Shrivastava,S.; Thovarai,V.; Wang,S.; Griesemer,S.B.; Bao,Y.; Sanders,R.; Zhdanov,S.; Kiryutin,B.; Lipman,D.J.; Tatusova,T.; St. George,K.
EPI517722	HA	United States	2012-May-05	B/New York/1377/2012		Other Database Import	Wentworth,D.E.; Halpin,R.A.; Lin,X.; Bera,J.; Akopov,A.; Ransier,A.; Mohan,M.; Fedorova,N.; Tsitrin,T.; Stockwell,T.; Amedeo,P.; Appalla,L.; Bishop,B.; Edworthy,P.; Gupta,N.; Hoover,J.; Katzel,D.; Li,K.; Schobel,S.; Shrivastava,S.; Thovarai,V.; Wang,S.; Griesemer,S.B.; Bao,Y.; Sanders,R.; Zhdanov,S.; Kiryutin,B.; Lipman,D.J.; Tatusova,T.; St. George,K.
EPI517712	HA	United States	2012-May-05	B/New York/1373/2012		Other Database Import	Wentworth,D.E.; Halpin,R.A.; Lin,X.; Bera,J.; Akopov,A.; Ransier,A.; Mohan,M.; Fedorova,N.; Tsitrin,T.; Stockwell,T.; Amedeo,P.; Appalla,L.; Bishop,B.; Edworthy,P.; Gupta,N.; Hoover,J.; Katzel,D.; Li,K.; Schobel,S.; Shrivastava,S.; Thovarai,V.; Wang,S.; Griesemer,S.B.; Bao,Y.; Sanders,R.; Zhdanov,S.; Kiryutin,B.; Lipman,D.J.; Tatusova,T.; St. George,K.
EPI517652	HA	United States	2011-Mar-09	B/New York/1291/2011		Other Database Import	Wentworth,D.E.; Halpin,R.A.; Lin,X.; Bera,J.; Akopov,A.; Ransier,A.; Mohan,M.; Fedorova,N.; Tsitrin,T.; Stockwell,T.; Amedeo,P.; Appalla,L.; Bishop,B.; Edworthy,P.; Gupta,N.; Hoover,J.; Katzel,D.; Li,K.; Schobel,S.; Shrivastava,S.; Thovarai,V.; Wang,S.; Griesemer,S.B.; Bao,Y.; Sanders,R.; Zhdanov,S.; Kiryutin,B.; Lipman,D.J.; Tatusova,T.; St. George,K.
EPI517583	HA	United States	2007-Jan-23	B/New York/1103/2007		Other Database Import	Wentworth,D.E.; Halpin,R.A.; Lin,X.; Bera,J.; Akopov,A.; Ransier,A.; Mohan,M.; Fedorova,N.; Tsitrin,T.; Stockwell,T.; Amedeo,P.; Appalla,L.; Bishop,B.; Edworthy,P.; Gupta,N.; Hoover,J.; Katzel,D.; Li,K.; Schobel,S.; Shrivastava,S.; Thovarai,V.; Wang,S.; Griesemer,S.B.; Bao,Y.; Sanders,R.; Zhdanov,S.; Kiryutin,B.; Lipman,D.J.; Tatusova,T.; St. George,K.
EPI517240	HA	United States	2013-Mar-14	B/Boston/YGB_01017/2013		Other Database Import	Wentworth,D.E.; Halpin,R.A.; Lin,X.; Bera,J.; Akopov,A.; Ransier,A.; Mohan,M.; Fedorova,N.; Tsitrin,T.; Stockwell,T.; Amedeo,P.; Appalla,L.; Bishop,B.; Edworthy,P.; Gupta,N.; Hoover,J.; Katzel,D.; Li,K.; Schobel,S.; Shrivastava,S.; Thovarai,V.; Wang,S.; Wilson,H.; Braidt,J.; Rosenberg,E.; Bao,Y.; Sanders,R.; Zhdanov,S.; Kiryutin,B.; Lipman,D.J.; Tatusova,T.; Grad,Y.
EPI517208	HA	United States	2013-Jan-31	B/Boston/YGB_01005/2013		Other Database Import	Wentworth,D.E.; Halpin,R.A.; Lin,X.; Bera,J.; Akopov,A.; Ransier,A.; Mohan,M.; Fedorova,N.; Tsitrin,T.; Stockwell,T.; Amedeo,P.; Appalla,L.; Bishop,B.; Edworthy,P.; Gupta,N.; Hoover,J.; Katzel,D.; Li,K.; Schobel,S.; Shrivastava,S.; Thovarai,V.; Wang,S.; Wilson,H.; Braidt,J.; Rosenberg,E.; Bao,Y.; Sanders,R.; Zhdanov,S.; Kiryutin,B.; Lipman,D.J.; Tatusova,T.; Grad,Y.
EPI517174	HA	United States	2013-Apr-27	B/Boston/YGB_01054/2013		Other Database Import	Wentworth,D.E.; Halpin,R.A.; Lin,X.; Bera,J.; Akopov,A.; Ransier,A.; Mohan,M.; Fedorova,N.; Tsitrin,T.; Stockwell,T.; Amedeo,P.; Appalla,L.; Bishop,B.; Edworthy,P.; Gupta,N.; Hoover,J.; Katzel,D.; Li,K.; Schobel,S.; Shrivastava,S.; Thovarai,V.; Wang,S.; Wilson,H.; Braidt,J.; Rosenberg,E.; Bao,Y.; Sanders,R.; Zhdanov,S.; Kiryutin,B.; Lipman,D.J.; Tatusova,T.; Grad,Y.
EPI517155	HA	Zambia	2013-Sep-14	B/Zambia/13/348/2013	University Teaching Hospital	National Institute for Medical Research
EPI517143	HA	Togo	2013-Nov-29	B/Togo/LNG/415/2013	Institute National D'Hygiene	National Institute for Medical Research
EPI517110	HA	United States	2014-Mar-20	B/New York/01/2014	New York State Department of Health	Centers for Disease Control and Prevention
EPI516757	HA	United States	2014-Mar-05	B/Colorado/01/2014	Colorado Department of Health Lab	Centers for Disease Control and Prevention
EPI516367	HA	Japan	2014-Jan-14	B/FUKUI/2/2014	Fukui Prefectural Institute of Public Health	National Institute of Infectious Diseases (NIID)	Takashita,Emi; Fujisaki,Seiichiro; Ejima,Miho; Odagiri,Takato
EPI515746	HA	Ethiopia	2014-Jan-06	B/Ethiopia/968/2014	Ethiopian Health and Nutrition Research Institute (EHNRI)	Centers for Disease Control and Prevention
EPI515241	HA	Germany	2014-Feb-10	B/Brandenburg/2/2014	Robert-Koch-Institute	National Institute for Medical Research
EPI511831	HA	Pakistan	2013-Nov-09	B/Pakistan/179/2013	National Institute of Health	Centers for Disease Control and Prevention
EPI510072	HA	United States	2014-Feb-06	B/California/03/2014	California Department of Health Services	Centers for Disease Control and Prevention
EPI508413	HA	United States	2014-Jan-03	B/Hawaii/02/2014	State of Hawaii Department of Health	Centers for Disease Control and Prevention
EPI508408	HA	United States	2014-Jan-16	B/Washington/01/2014	Seattle & King County Public Health Lab	Centers for Disease Control and Prevention
EPI508282	HA	Sweden	2014-Feb-01	B/Stockholm/2/2014		Swedish Institute for Infectious Disease Control
EPI507678	HA	Japan	2014-Jan-02	B/SAPPORO/2/2014	Sapporo City Institute of Public Health	National Institute of Infectious Diseases (NIID)	Takashita,Emi; Fujisaki,Seiichiro; Itoh,Reiko; Miura,Mai; Ejima,Miho; Tashiro,Masato; Odagiri,Takato
EPI505331	HA	Israel	2013-Nov-13	B/Israel/2/2013	Central Virology Laboratory Israel (NIC)	National Institute for Medical Research
EPI504818	HA	United States	2014-Jan-07	B/Nevada/01/2014	Nevada State Health Laboratory	Centers for Disease Control and Prevention
EPI504654	HA	Japan	2014-Jan-06	B/SAPPORO/1/2014	Sapporo City Institute of Public Health	National Institute of Infectious Diseases (NIID)	Takashita,Emi; Fujisaki,Seiichiro; Itoh,Reiko; Miura,Mai; Ejima,Miho; Tashiro,Masato; Odagiri,Takato
EPI503732	HA	Norway	2013-Nov-22	B/Norway/3200/2013	Akershus University Hospital	Norwegian Institute of Public Health	Dudman SG, Waalen K, Hungnes O
EPI503594	HA	Taiwan	2013-Nov-05	B/Taiwan/22/2013	ADImmune Corporation	Centers for Disease Control and Prevention
EPI503141	HA	Australia	2004-Oct-14	B/Sydney/6/2004		Other Database Import	Wentworth,D.E.; Halpin,R.A.; Lin,X.; Zhou,B.; Bera,J.; Ransier,A.; Fedorova,N.; Tsitrin,T.; McLellan,M.; Stockwell,T.; Amedeo,P.; Appalla,L.; Bishop,B.; Edworthy,P.; Gupta,N.; Hoover,J.; Katzel,D.; Li,K.; Schobel,S.; Shrivastava,S.; Thovarai,V.; Wang,S.; Barr,I.; Dhanasekaran,V.; Deng,Y.M.; Hurt,A.; Komadina,N.; Smith,G.; Bao,Y.; Sanders,R.; Dernovoy,D.; Kiryutin,B.; Lipman,D.J.; Tatusova,T.
EPI503133	HA	Australia	2004-Sep-02	B/Victoria/104/2004		Other Database Import	Wentworth,D.E.; Halpin,R.A.; Lin,X.; Zhou,B.; Bera,J.; Ransier,A.; Fedorova,N.; Tsitrin,T.; McLellan,M.; Stockwell,T.; Amedeo,P.; Appalla,L.; Bishop,B.; Edworthy,P.; Gupta,N.; Hoover,J.; Katzel,D.; Li,K.; Schobel,S.; Shrivastava,S.; Thovarai,V.; Wang,S.; Barr,I.; Dhanasekaran,V.; Deng,Y.M.; Hurt,A.; Komadina,N.; Smith,G.; Bao,Y.; Sanders,R.; Dernovoy,D.; Kiryutin,B.; Lipman,D.J.; Tatusova,T.
EPI503053	HA	Australia	2011-Jun-14	B/Brisbane/29/2011		Other Database Import	Wentworth,D.E.; Halpin,R.A.; Lin,X.; Zhou,B.; Bera,J.; Ransier,A.; Fedorova,N.; Tsitrin,T.; McLellan,M.; Stockwell,T.; Amedeo,P.; Appalla,L.; Bishop,B.; Edworthy,P.; Gupta,N.; Hoover,J.; Katzel,D.; Li,K.; Schobel,S.; Shrivastava,S.; Thovarai,V.; Wang,S.; Barr,I.; Dhanasekaran,V.; Deng,Y.M.; Hurt,A.; Komadina,N.; Smith,G.; Bao,Y.; Sanders,R.; Dernovoy,D.; Kiryutin,B.; Lipman,D.J.; Tatusova,T.
EPI503045	HA	Australia	2011-Jun-07	B/Victoria/506/2011		Other Database Import	Wentworth,D.E.; Halpin,R.A.; Lin,X.; Zhou,B.; Bera,J.; Ransier,A.; Fedorova,N.; Tsitrin,T.; McLellan,M.; Stockwell,T.; Amedeo,P.; Appalla,L.; Bishop,B.; Edworthy,P.; Gupta,N.; Hoover,J.; Katzel,D.; Li,K.; Schobel,S.; Shrivastava,S.; Thovarai,V.; Wang,S.; Barr,I.; Dhanasekaran,V.; Deng,Y.M.; Hurt,A.; Komadina,N.; Smith,G.; Bao,Y.; Sanders,R.; Dernovoy,D.; Kiryutin,B.; Lipman,D.J.; Tatusova,T.
EPI502803	HA	Australia	2005-Jun-19	B/Brisbane/6/2005		Other Database Import	Wentworth,D.E.; Halpin,R.A.; Lin,X.; Zhou,B.; Bera,J.; Ransier,A.; Fedorova,N.; Tsitrin,T.; McLellan,M.; Stockwell,T.; Amedeo,P.; Appalla,L.; Bishop,B.; Edworthy,P.; Gupta,N.; Hoover,J.; Katzel,D.; Li,K.; Schobel,S.; Shrivastava,S.; Thovarai,V.; Wang,S.; Barr,I.; Dhanasekaran,V.; Deng,Y.M.; Hurt,A.; Komadina,N.; Smith,G.; Bao,Y.; Sanders,R.; Dernovoy,D.; Kiryutin,B.; Lipman,D.J.; Tatusova,T.
EPI499516	HA	United States	2013-Apr-26	B/New York/3452/2013		Other Database Import	Connors,B.C.; Jones,S.L.; Bisaha,S.A.; Canas,L.C.; Baker,J.A.; Cosme,K.W.; Couch,M.R.; Garrett,C.M.; Weghorst,K.L.; Davis,M.G.; Hanson,J.F.; Yohannes,R.A.; Abshire,J.P.; DeMarcus,L.S.; Smith,J.P.; Fumia,K.F.; Zorich,S.C.; Macias,E.A.; Noe,J.C.; Sjoberg,P.A.
EPI499515	HA	United States	2013-Apr-16	B/Washington/3451/2013		Other Database Import	Connors,B.C.; Jones,S.L.; Bisaha,S.A.; Canas,L.C.; Baker,J.A.; Cosme,K.W.; Couch,M.R.; Garrett,C.M.; Weghorst,K.L.; Davis,M.G.; Hanson,J.F.; Yohannes,R.A.; Abshire,J.P.; DeMarcus,L.S.; Smith,J.P.; Fumia,K.F.; Zorich,S.C.; Macias,E.A.; Noe,J.C.; Sjoberg,P.A.
EPI498821	HA	China	2013-Dec-04	B/Shaanxi-Bei-Lin/11312/2013	WHO Chinese National Influenza Center	WHO Chinese National Influenza Center	Yu Lan,Xiyan Li,Xiang Zhao,Yanhui Cheng,minju Tan,Weijuan Huang,Dayan Wang,Dexin Li,Yuelong Shu
EPI498309	HA	Canada	2013-Oct-24	B/Ontario/RV2326/2013	National Microbiology Laboratory, Health Canada	Centers for Disease Control and Prevention
EPI498048	HA	Australia	2008-Aug-04	B/Brisbane/60/2008	WHO Centre for Reference & Research on Influenza	National Institute for Medical Research
EPI493763	HA	United States	2013-Feb-15	B/California/NHRC394074/2013		Other Database Import	Thammavong,H.; Balansay-Ames,M.; Hawksworth,A.; Myers,C.A.; Connors,B.; de Mattos,C.; Brice,G.
EPI493732	HA	United States	2013-Mar-14	B/Illinois/NHRC395528/2013		Other Database Import	Thammavong,H.; Balansay-Ames,M.; Hawksworth,A.; Myers,C.A.; Connors,B.; de Mattos,C.; Brice,G.
EPI491494	HA	Australia	2013-Sep-22	B/TASMANIA/9/2013	Royal Hobart Hospital	WHO Collaborating Centre for Reference and Research on Influenza	Deng,Y-M; Iannello,P; Spirason,N; Jelley,L; Lau,H; Komadina,N
EPI491452	HA	Australia	2013-Aug-17	B/CANBERRA/32/2013	Canberra Hospital	WHO Collaborating Centre for Reference and Research on Influenza	Deng,Y-M; Iannello,P; Spirason,N; Jelley,L; Lau,H; Komadina,N
EPI491404	HA	Australia	2013-Sep-03	B/VICTORIA/637/2013	Monash Medical Centre	WHO Collaborating Centre for Reference and Research on Influenza	Deng,Y-M; Iannello,P; Spirason,N; Jelley,L; Lau,H; Komadina,N
EPI491160	HA	Australia	2013-Jun-28	B/BRISBANE/20/2013	Queensland Health Scientific Services	WHO Collaborating Centre for Reference and Research on Influenza	Deng,Y-M; Iannello,P; Spirason,N; Jelley,L; Lau,H; Komadina,N
EPI491112	HA	Bahrain	2012-Dec-03	B/Bahrain/209/2012	Ministry of Health Bahrain	Centers for Disease Control and Prevention
EPI491109	HA	Bahrain	2013-Jan-15	B/Bahrain/28/2013	Ministry of Health Bahrain	Centers for Disease Control and Prevention
EPI484828	HA	New Zealand	2008-Sep-08	B/Auckland/157/2008		Other Database Import	Wentworth,D.E.; Halpin,R.A.; Lin,X.; Zhou,B.; Bera,J.; Ransier,A.; Fedorova,N.; Tsitrin,T.; McLellan,M.; Stockwell,T.; Amedeo,P.; Appalla,L.; Bishop,B.; Edworthy,P.; Gupta,N.; Hoover,J.; Katzel,D.; Li,K.; Schobel,S.; Shrivastava,S.; Thovarai,V.; Wang,S.; Barr,I.; Dhanasekaran,V.; Deng,Y.M.; Hurt,A.; Komadina,N.; Smith,G.; Bao,Y.; Sanders,R.; Dernovoy,D.; Kiryutin,B.; Lipman,D.J.; Tatusova,T.
EPI484816	HA	Australia	2008-Aug-19	B/Sydney/37/2008		Other Database Import	Wentworth,D.E.; Halpin,R.A.; Lin,X.; Zhou,B.; Bera,J.; Ransier,A.; Fedorova,N.; Tsitrin,T.; McLellan,M.; Stockwell,T.; Amedeo,P.; Appalla,L.; Bishop,B.; Edworthy,P.; Gupta,N.; Hoover,J.; Katzel,D.; Li,K.; Schobel,S.; Shrivastava,S.; Thovarai,V.; Wang,S.; Barr,I.; Dhanasekaran,V.; Deng,Y.M.; Hurt,A.; Komadina,N.; Smith,G.; Bao,Y.; Sanders,R.; Dernovoy,D.; Kiryutin,B.; Lipman,D.J.; Tatusova,T.
EPI484769	HA	Australia	2007-Feb-06	B/Brisbane/2/2007		Other Database Import	Wentworth,D.E.; Halpin,R.A.; Lin,X.; Zhou,B.; Bera,J.; Ransier,A.; Fedorova,N.; Tsitrin,T.; McLellan,M.; Stockwell,T.; Amedeo,P.; Appalla,L.; Bishop,B.; Edworthy,P.; Gupta,N.; Hoover,J.; Katzel,D.; Li,K.; Schobel,S.; Shrivastava,S.; Thovarai,V.; Wang,S.; Barr,I.; Dhanasekaran,V.; Deng,Y.M.; Hurt,A.; Komadina,N.; Smith,G.; Bao,Y.; Sanders,R.; Dernovoy,D.; Kiryutin,B.; Lipman,D.J.; Tatusova,T.
EPI484763	HA	Australia	2006-Aug-22	B/Sydney/210/2006		Other Database Import	Wentworth,D.E.; Halpin,R.A.; Lin,X.; Zhou,B.; Bera,J.; Ransier,A.; Fedorova,N.; Tsitrin,T.; McLellan,M.; Stockwell,T.; Amedeo,P.; Appalla,L.; Bishop,B.; Edworthy,P.; Gupta,N.; Hoover,J.; Katzel,D.; Li,K.; Schobel,S.; Shrivastava,S.; Thovarai,V.; Wang,S.; Barr,I.; Dhanasekaran,V.; Deng,Y.M.; Hurt,A.; Komadina,N.; Smith,G.; Bao,Y.; Sanders,R.; Dernovoy,D.; Kiryutin,B.; Lipman,D.J.; Tatusova,T.
EPI484084	HA	Australia	2008-Sep-17	B/Sydney/105/2008		Other Database Import	Wentworth,D.E.; Halpin,R.A.; Lin,X.; Zhou,B.; Bera,J.; Ransier,A.; Fedorova,N.; Tsitrin,T.; McLellan,M.; Stockwell,T.; Amedeo,P.; Appalla,L.; Bishop,B.; Edworthy,P.; Gupta,N.; Hoover,J.; Katzel,D.; Li,K.; Schobel,S.; Shrivastava,S.; Thovarai,V.; Wang,S.; Barr,I.; Dhanasekaran,V.; Deng,Y.M.; Hurt,A.; Komadina,N.; Smith,G.; Bao,Y.; Sanders,R.; Dernovoy,D.; Kiryutin,B.; Lipman,D.J.; Tatusova,T.
EPI484012	HA	Australia	2008-Aug-21	B/Brisbane/162/2008		Other Database Import	Wentworth,D.E.; Halpin,R.A.; Lin,X.; Zhou,B.; Bera,J.; Ransier,A.; Fedorova,N.; Tsitrin,T.; McLellan,M.; Stockwell,T.; Amedeo,P.; Appalla,L.; Bishop,B.; Edworthy,P.; Gupta,N.; Hoover,J.; Katzel,D.; Li,K.; Schobel,S.; Shrivastava,S.; Thovarai,V.; Wang,S.; Barr,I.; Dhanasekaran,V.; Deng,Y.M.; Hurt,A.; Komadina,N.; Smith,G.; Bao,Y.; Sanders,R.; Dernovoy,D.; Kiryutin,B.; Lipman,D.J.; Tatusova,T.
EPI483876	HA	Australia	2008-Jul-24	B/Brisbane/34/2008		Other Database Import	Wentworth,D.E.; Halpin,R.A.; Lin,X.; Zhou,B.; Bera,J.; Ransier,A.; Fedorova,N.; Tsitrin,T.; McLellan,M.; Stockwell,T.; Amedeo,P.; Appalla,L.; Bishop,B.; Edworthy,P.; Gupta,N.; Hoover,J.; Katzel,D.; Li,K.; Schobel,S.; Shrivastava,S.; Thovarai,V.; Wang,S.; Barr,I.; Dhanasekaran,V.; Deng,Y.M.; Hurt,A.; Komadina,N.; Smith,G.; Bao,Y.; Sanders,R.; Dernovoy,D.; Kiryutin,B.; Lipman,D.J.; Tatusova,T.
EPI483740	HA	Australia	2008-Jun-15	b/sydney/508/2008		Other Database Import	Wentworth,D.E.; Halpin,R.A.; Lin,X.; Zhou,B.; Bera,J.; Ransier,A.; Fedorova,N.; Tsitrin,T.; McLellan,M.; Stockwell,T.; Amedeo,P.; Appalla,L.; Bishop,B.; Edworthy,P.; Gupta,N.; Hoover,J.; Katzel,D.; Li,K.; Schobel,S.; Shrivastava,S.; Thovarai,V.; Wang,S.; Barr,I.; Dhanasekaran,V.; Deng,Y.M.; Hurt,A.; Komadina,N.; Smith,G.; Bao,Y.; Sanders,R.; Dernovoy,D.; Kiryutin,B.; Lipman,D.J.; Tatusova,T.
EPI483596	HA	Australia	2007-Nov-02	B/Brisbane/27/2007		Other Database Import	Wentworth,D.E.; Halpin,R.A.; Lin,X.; Zhou,B.; Bera,J.; Ransier,A.; Fedorova,N.; Tsitrin,T.; McLellan,M.; Stockwell,T.; Amedeo,P.; Appalla,L.; Bishop,B.; Edworthy,P.; Gupta,N.; Hoover,J.; Katzel,D.; Li,K.; Schobel,S.; Shrivastava,S.; Thovarai,V.; Wang,S.; Barr,I.; Dhanasekaran,V.; Deng,Y.M.; Hurt,A.; Komadina,N.; Smith,G.; Bao,Y.; Sanders,R.; Dernovoy,D.; Kiryutin,B.; Lipman,D.J.; Tatusova,T.
EPI483492	HA	Australia	2007-Sep-27	B/Victoria/510/2007		Other Database Import	Wentworth,D.E.; Halpin,R.A.; Lin,X.; Zhou,B.; Bera,J.; Ransier,A.; Fedorova,N.; Tsitrin,T.; McLellan,M.; Stockwell,T.; Amedeo,P.; Appalla,L.; Bishop,B.; Edworthy,P.; Gupta,N.; Hoover,J.; Katzel,D.; Li,K.; Schobel,S.; Shrivastava,S.; Thovarai,V.; Wang,S.; Barr,I.; Dhanasekaran,V.; Deng,Y.M.; Hurt,A.; Komadina,N.; Smith,G.; Bao,Y.; Sanders,R.; Dernovoy,D.; Kiryutin,B.; Lipman,D.J.; Tatusova,T.
EPI483444	HA	Australia	2007-Sep-11	B/Victoria/219/2007		Other Database Import	Wentworth,D.E.; Halpin,R.A.; Lin,X.; Zhou,B.; Bera,J.; Ransier,A.; Fedorova,N.; Tsitrin,T.; McLellan,M.; Stockwell,T.; Amedeo,P.; Appalla,L.; Bishop,B.; Edworthy,P.; Gupta,N.; Hoover,J.; Katzel,D.; Li,K.; Schobel,S.; Shrivastava,S.; Thovarai,V.; Wang,S.; Barr,I.; Dhanasekaran,V.; Deng,Y.M.; Hurt,A.; Komadina,N.; Smith,G.; Bao,Y.; Sanders,R.; Dernovoy,D.; Kiryutin,B.; Lipman,D.J.; Tatusova,T.
EPI483396	HA	New Zealand	2007-Sep-05	B/Wellington/11/2007		Other Database Import	Wentworth,D.E.; Halpin,R.A.; Lin,X.; Zhou,B.; Bera,J.; Ransier,A.; Fedorova,N.; Tsitrin,T.; McLellan,M.; Stockwell,T.; Amedeo,P.; Appalla,L.; Bishop,B.; Edworthy,P.; Gupta,N.; Hoover,J.; Katzel,D.; Li,K.; Schobel,S.; Shrivastava,S.; Thovarai,V.; Wang,S.; Barr,I.; Dhanasekaran,V.; Deng,Y.M.; Hurt,A.; Komadina,N.; Smith,G.; Bao,Y.; Sanders,R.; Dernovoy,D.; Kiryutin,B.; Lipman,D.J.; Tatusova,T.
[truncated: 7,625 more rows]

## Sheet: NA
We acknowledge the authors, originating and submitting laboratories of the sequences from GISAID’s EpiFlu Database on which this research is based. The list is detailed below.
All submitters of data may be contacted directly via the GISAID website www.gisaid.org
Segment ID	Segment	Country	Collection date	Isolate name	Originating Lab	Submitting Lab	Authors
[truncated: 6,295 more rows]

## Sheet: PB2
We acknowledge the authors, originating and submitting laboratories of the sequences from GISAID’s EpiFlu Database on which this research is based. The list is detailed below.
[truncated: 2,615 more rows]

[truncated: 5 more sheets: PB1, PA, NP, MP, NS]
