# Supplementary material for: Genome-wide evolutionary dynamics of influenza B viruses on a global scale
Source: PLOS journal article supplement (doi:10.1371/journal.ppat.1006749), 2017-12-28
Supplement: S5 (10.1371/journal.ppat.1006749.s005) [file journal.ppat.1006749.s005]

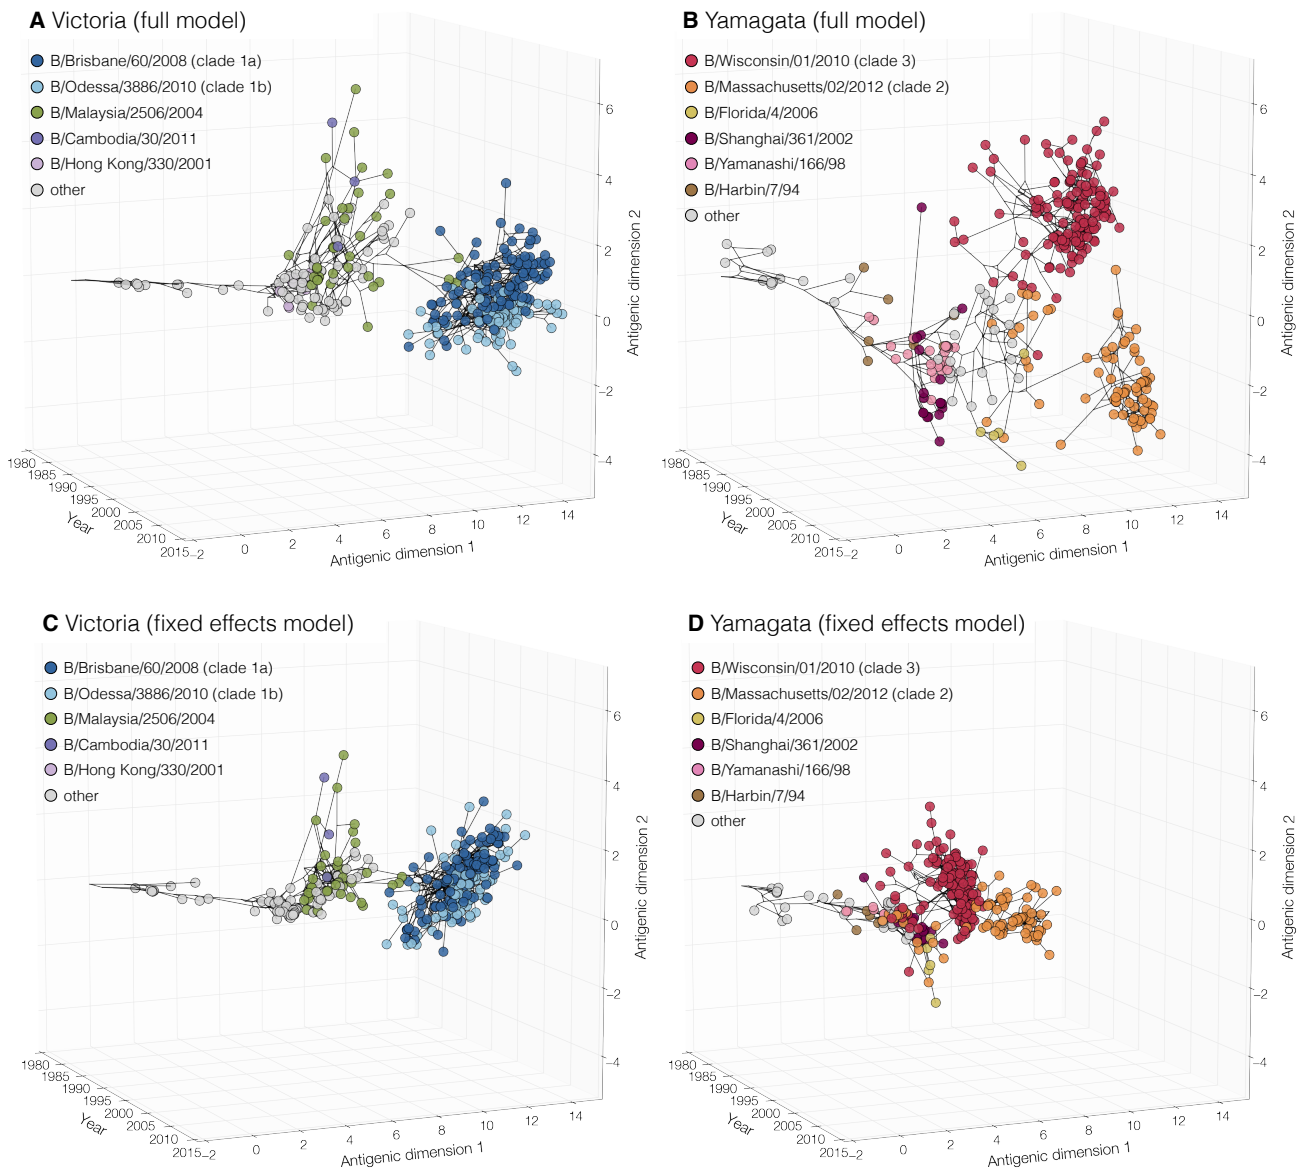

**S5 Fig. Antigenic map configurations for 309 Victoria-lineage and 308 Yamagata-lineage viruses inferred under BMDS models with co-estimated (A, B) and fixed (C,D) serum potencies and virus avidities, shown in two antigenic dimensions and one time dimension. See Fig 4 legend for further details and S1 and S2 Videos for animated visualizations.**
