# Supplementary material for: Genome-wide evolutionary dynamics of influenza B viruses on a global scale
Source: PLOS journal article supplement (doi:10.1371/journal.ppat.1006749), 2017-12-28
Supplement: S6 (10.1371/journal.ppat.1006749.s006) [file journal.ppat.1006749.s006]

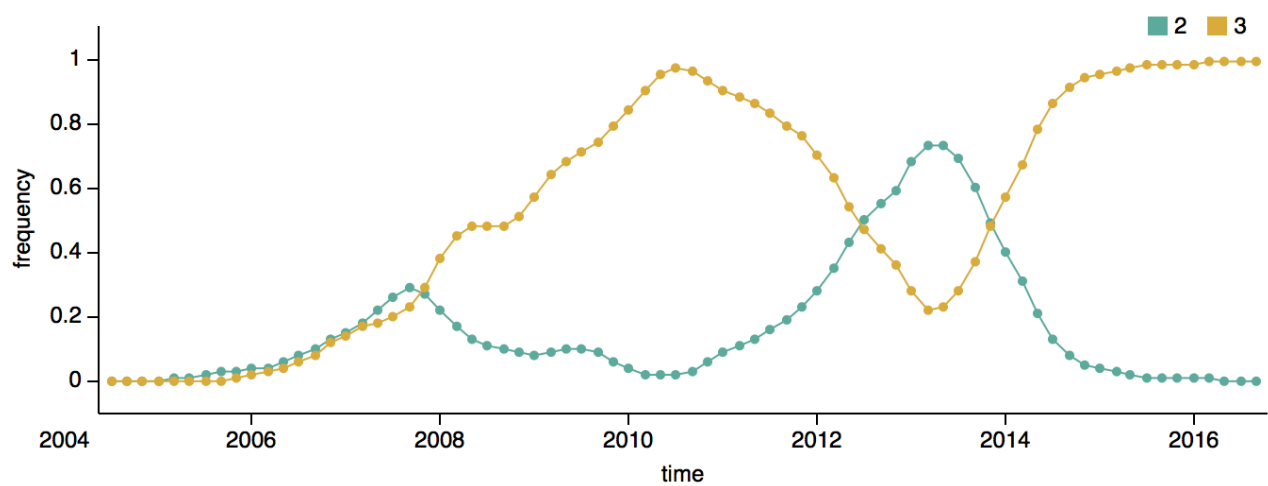

**S6 Fig. Estimated global relative frequencies for Yamagata-lineage clade 2 and clade 3 viruses.** As reported on nextflu.org (accessed 8 August 2016).
